# Supplementary material for: Effects of Dietary L-TRP on Immunity, Antioxidant Capacity and Intestinal Microbiota of the Chinese Mitten Crab (Eriocheir Sinensis) in Pond Culture
Source: MDPI journal article supplement (doi:10.3390/metabo13010001), 2022-12-20
Supplement: s1 [file s1]

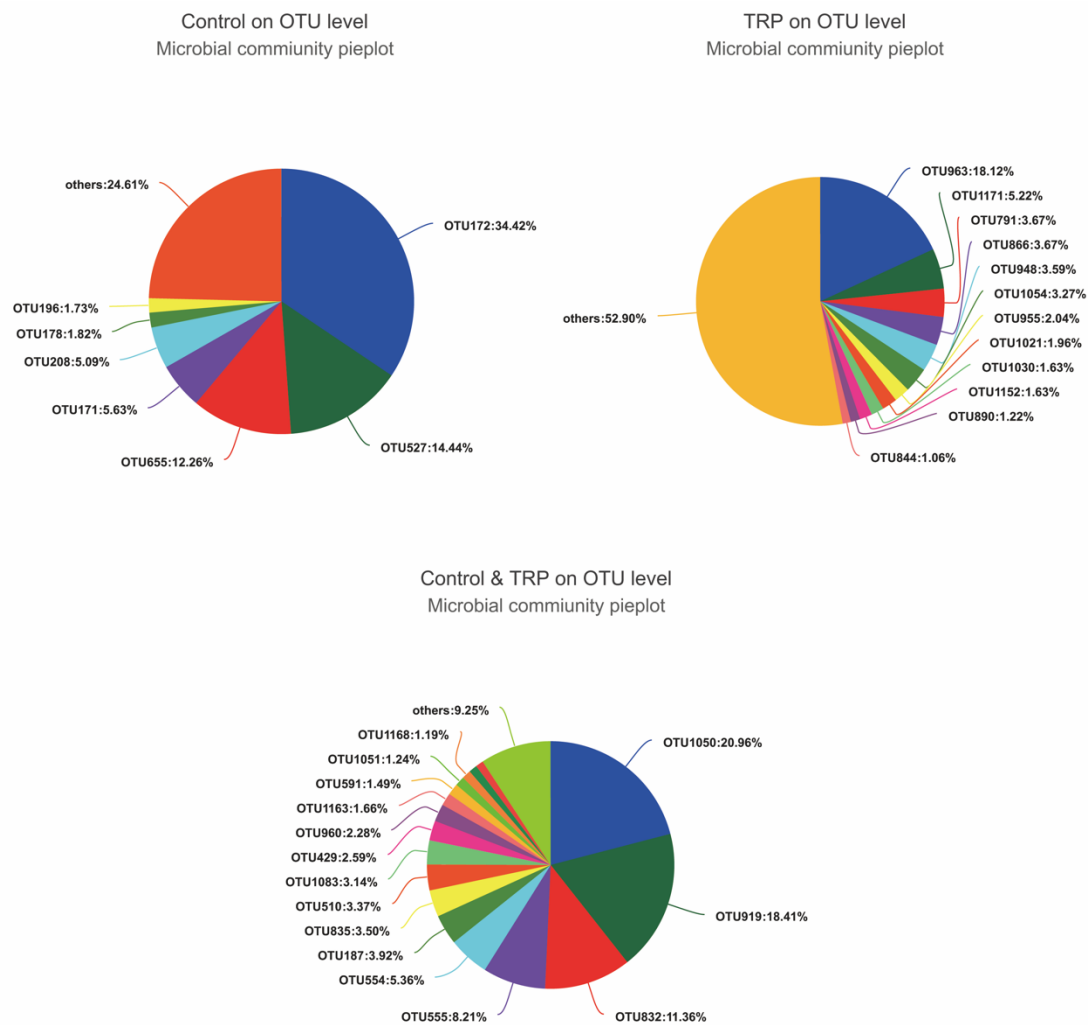

Figure S1. The distribution of unique or common species in control and L-TRP groups in August.

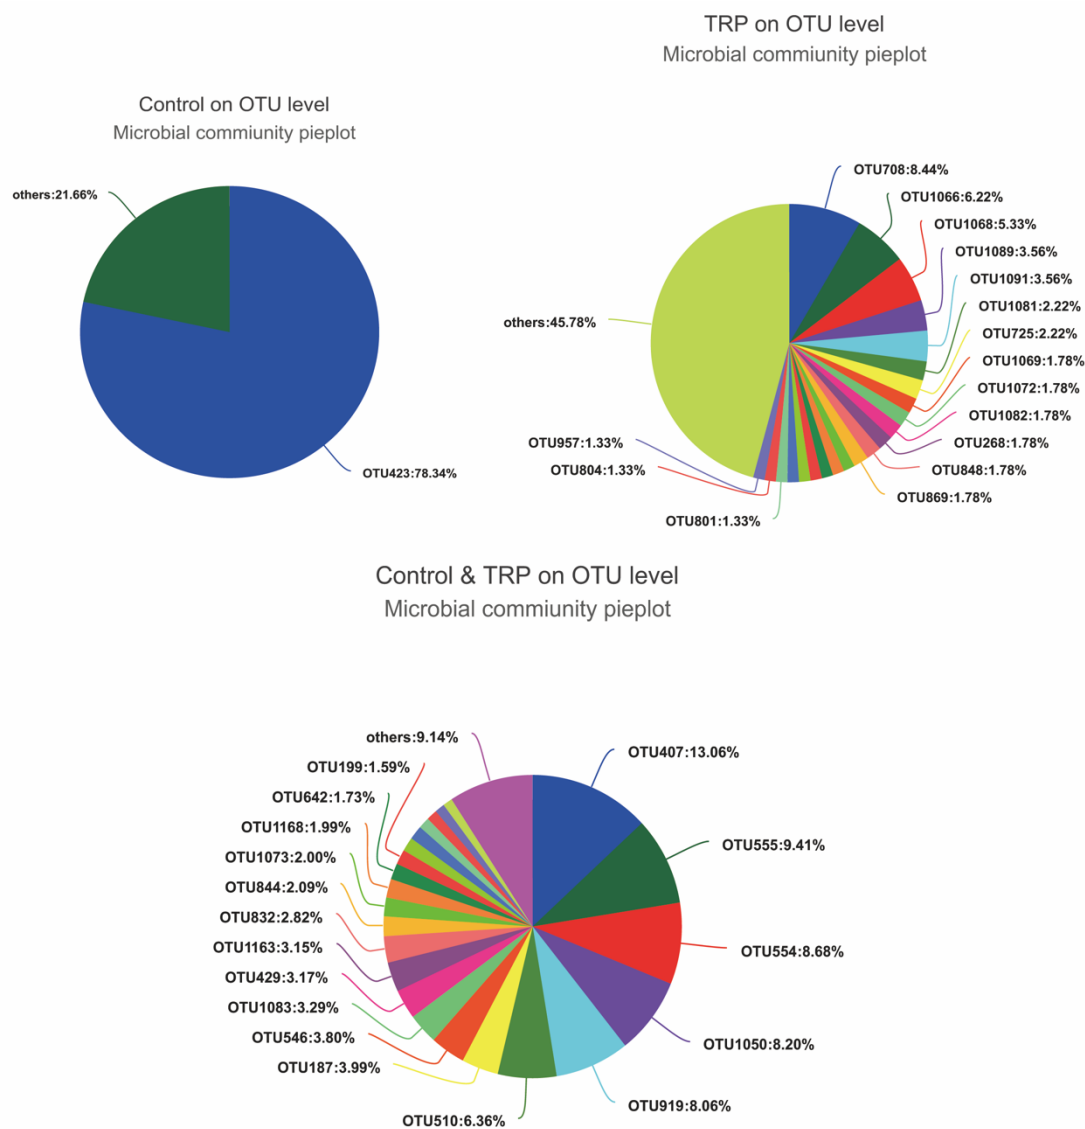

Figure S2. The distribution of unique or common species in control and L-TRP groups in September.

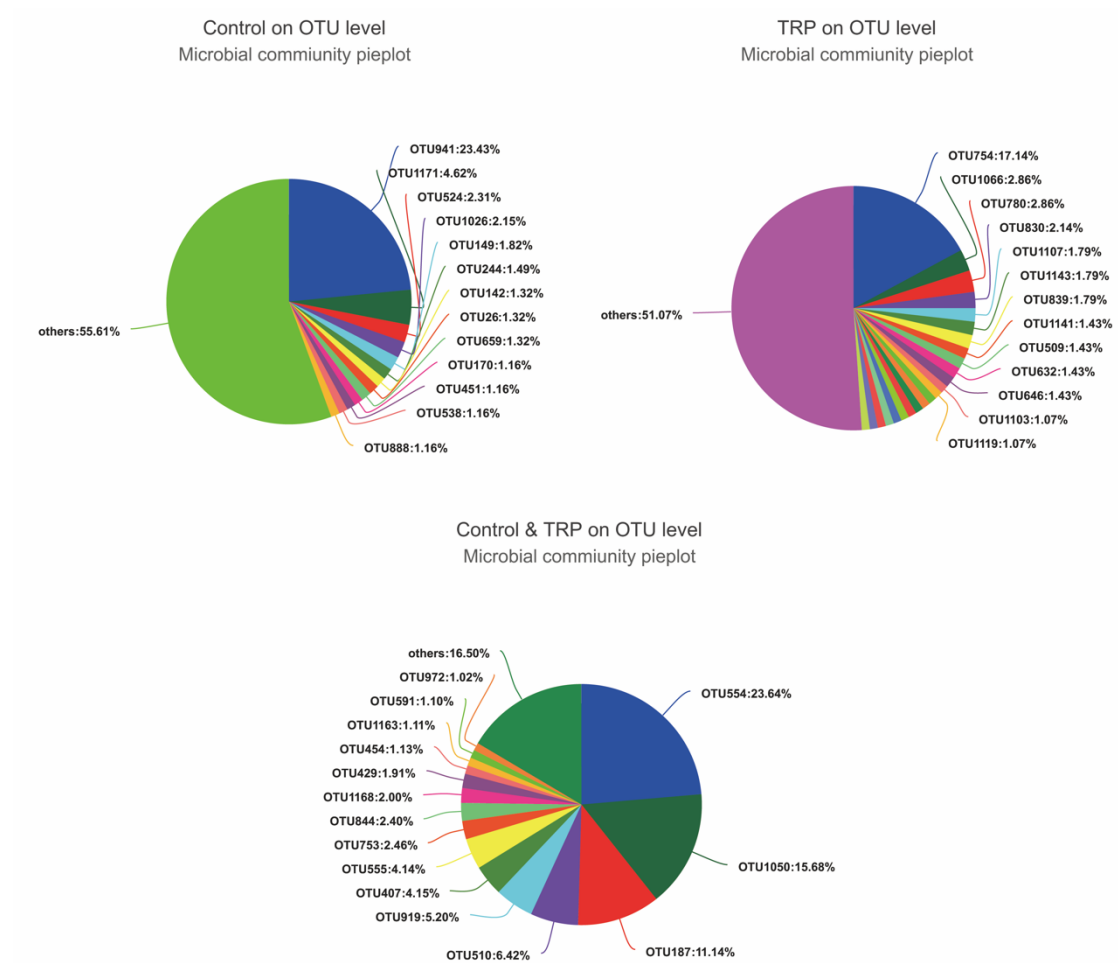

Figure S3. The distribution of unique or common species in control and L-TRP groups in November.
