# Supplementary material for: Effects of Dietary L-TRP on Immunity, Antioxidant Capacity and Intestinal Microbiota of the Chinese Mitten Crab (Eriocheir Sinensis) in Pond Culture
Source: Metabolites. 2022 Dec 20;13(1):1. doi: 10.3390/metabo13010001 (PMC9866439; doi:10.3390/metabo13010001)
Supplement: Supplementary file 1 [file metabolites-13-00001-s001.zip]

Archive with 7 entries (7 files):
- Figure S1.tif
- Figure S2.tif
- Figure S3.tif
- Supplementary  Material.pdf
- Table S1-OTU species classification statistics in Aug..csv
- Table S2-OTU species classification statistics in Sep..csv
- Table S3-OTU species classification statistics in Nov..csv
