# Supplementary material for: Effects of Dietary L-TRP on Immunity, Antioxidant Capacity and Intestinal Microbiota of the Chinese Mitten Crab (Eriocheir Sinensis) in Pond Culture
Source: Metabolites. 2022 Dec 20;13(1):1. doi: 10.3390/metabo13010001 (PMC9866439; doi:10.3390/metabo13010001)
Supplement: Supplementary file 1 [file metabolites-13-00001-s001.zip › Table S1-OTU species classification statistics in Aug..csv]

Domain	Kingdom	Phylum	Class	Order	Family	Genus	Species	OTU	C5_August	C1_August	C3_August	C4_August	C6_August	L2_August	L3_August	L4_August	L5_August	L6_August	SUM
d__Bacteria	k__norank_d__Bacteria	p__Verrucomicrobiota	c__Chlamydiae	o__Chlamydiales	f__unclassified_o__Chlamydiales	g__unclassified_o__Chlamydiales	s__unclassified_o__Chlamydiales	OTU907	0	0	0	0	0	0	0	0	0	1	1
d__Bacteria	k__norank_d__Bacteria	p__Chloroflexi	c__Anaerolineae	o__SJA-15	f__norank_o__SJA-15	g__norank_f__norank_o__SJA-15	s__uncultured_bacterium_g__norank_f__norank_o__SJA-15	OTU61	0	0	0	1	0	2	0	0	0	0	3
d__Bacteria	k__norank_d__Bacteria	p__Patescibacteria	c__Dojkabacteria	o__norank_c__Dojkabacteria	f__norank_o__norank_c__Dojkabacteria	g__norank_f__norank_o__norank_c__Dojkabacteria	s__uncultured_bacterium_g__norank_f__norank_o__norank_c__Dojkabacteria	OTU629	0	0	0	0	0	0	0	1	0	0	1
d__Bacteria	k__norank_d__Bacteria	p__Firmicutes	c__Bacilli	o__Mycoplasmatales	f__Mycoplasmataceae	g__norank_f__Mycoplasmataceae	s__uncultured_Firmicutes_bacterium_g__norank_f__Mycoplasmataceae	OTU971	29	107	27	92	100	0	1	447	124	9	936
d__Bacteria	k__norank_d__Bacteria	p__Firmicutes	c__Bacilli	o__Mycoplasmatales	f__Mycoplasmataceae	g__norank_f__Mycoplasmataceae	s__uncultured_Firmicutes_bacterium_g__norank_f__Mycoplasmataceae	OTU972	37	102	9	137	237	24	346	274	61	757	1984
d__Bacteria	k__norank_d__Bacteria	p__Proteobacteria	c__Alphaproteobacteria	o__Elsterales	f__norank_o__Elsterales	g__norank_f__norank_o__Elsterales	s__unclassified_g__norank_f__norank_o__Elsterales	OTU317	0	2	0	0	0	0	0	0	0	0	2
d__Bacteria	k__norank_d__Bacteria	p__Patescibacteria	c__CPR2	o__norank_c__CPR2	f__norank_o__norank_c__CPR2	g__norank_f__norank_o__norank_c__CPR2	s__uncultured_bacterium_g__norank_f__norank_o__norank_c__CPR2	OTU988	0	1	0	0	0	0	0	0	0	0	1
d__Bacteria	k__norank_d__Bacteria	p__Chloroflexi	c__KD4-96	o__norank_c__KD4-96	f__norank_o__norank_c__KD4-96	g__norank_f__norank_o__norank_c__KD4-96	s__uncultured_bacterium_g__norank_f__norank_o__norank_c__KD4-96	OTU73	0	0	0	0	0	0	0	1	0	1	2
d__Bacteria	k__norank_d__Bacteria	p__Patescibacteria	c__norank_p__Patescibacteria	o__norank_c__norank_p__Patescibacteria	f__norank_o__norank_c__norank_p__Patescibacteria	g__norank_f__norank_o__norank_c__norank_p__Patescibacteria	s__uncultured_bacterium_g__norank_f__norank_o__norank_c__norank_p__Patescibacteria	OTU416	0	0	0	5	0	0	0	0	0	0	5
d__Bacteria	k__norank_d__Bacteria	p__Bacteroidota	c__Bacteroidia	o__Chitinophagales	f__Saprospiraceae	g__norank_f__Saprospiraceae	s__unclassified_g__norank_f__Saprospiraceae	OTU160	0	2	0	0	2	0	0	1	0	0	5
d__Bacteria	k__norank_d__Bacteria	p__Chloroflexi	c__AD3	o__norank_c__AD3	f__norank_o__norank_c__AD3	g__norank_f__norank_o__norank_c__AD3	s__uncultured_Chloroflexi_bacterium_g__norank_f__norank_o__norank_c__AD3	OTU1044	0	3	0	0	0	0	0	0	1	0	4
d__Bacteria	k__norank_d__Bacteria	p__Proteobacteria	c__Alphaproteobacteria	o__Acetobacterales	f__Acetobacteraceae	g__Rhodovastum	s__uncultured_bacterium_g__Rhodovastum	OTU342	0	1	0	0	0	0	2	0	0	0	3
d__Bacteria	k__norank_d__Bacteria	p__Firmicutes	c__Negativicutes	o__Veillonellales-Selenomonadales	f__Sporomusaceae	g__Anaerosinus	s__uncultured_bacterium_g__Anaerosinus	OTU862	0	0	0	0	0	1	0	0	0	0	1
d__Bacteria	k__norank_d__Bacteria	p__Bdellovibrionota	c__Oligoflexia	o__0319-6G20	f__norank_o__0319-6G20	g__norank_f__norank_o__0319-6G20	s__unclassified_g__norank_f__norank_o__0319-6G20	OTU174	0	2	0	0	0	0	0	0	0	1	3
d__Bacteria	k__norank_d__Bacteria	p__Firmicutes	c__Bacilli	o__Mycoplasmatales	f__Mycoplasmataceae	g__norank_f__Mycoplasmataceae	s__uncultured_bacterium_g__norank_f__Mycoplasmataceae	OTU454	0	21	0	58	5	97	629	0	39	23	872
d__Bacteria	k__norank_d__Bacteria	p__Actinobacteriota	c__RBG-16-55-12	o__norank_c__RBG-16-55-12	f__norank_o__norank_c__RBG-16-55-12	g__norank_f__norank_o__norank_c__RBG-16-55-12	s__uncultured_bacterium_g__norank_f__norank_o__norank_c__RBG-16-55-12	OTU1047	0	0	0	0	0	0	0	0	1	0	1
d__Bacteria	k__norank_d__Bacteria	p__Firmicutes	c__Clostridia	o__Clostridiales	f__Clostridiaceae	g__Clostridium_sensu_stricto_11	s__Clostridium_acetobutylicum_ATCC_824	OTU1031	0	0	0	0	0	0	0	6	0	0	6
d__Bacteria	k__norank_d__Bacteria	p__Actinobacteriota	c__Actinobacteria	o__Kineosporiales	f__Kineosporiaceae	g__unclassified_f__Kineosporiaceae	s__unclassified_f__Kineosporiaceae	OTU85	0	1	0	0	0	0	0	0	1	0	2
d__Bacteria	k__norank_d__Bacteria	p__Actinobacteriota	c__Actinobacteria	o__PeM15	f__norank_o__PeM15	g__norank_f__norank_o__PeM15	s__metagenome_g__norank_f__norank_o__PeM15	OTU1027	0	0	0	0	0	0	0	1	0	1	2
d__Bacteria	k__norank_d__Bacteria	p__Chloroflexi	c__Anaerolineae	o__1-20	f__norank_o__1-20	g__norank_f__norank_o__1-20	s__unclassified_g__norank_f__norank_o__1-20	OTU878	0	0	0	0	0	1	0	1	0	0	2
d__Bacteria	k__norank_d__Bacteria	p__SAR324_cladeMarine_group_B	c__norank_p__SAR324_cladeMarine_group_B	o__norank_c__norank_p__SAR324_cladeMarine_group_B	f__norank_o__norank_c__norank_p__SAR324_cladeMarine_group_B	g__norank_f__norank_o__norank_c__norank_p__SAR324_cladeMarine_group_B	s__uncultured_prokaryote_g__norank_f__norank_o__norank_c__norank_p__SAR324_cladeMarine_group_B	OTU889	0	0	0	0	0	2	0	0	0	0	2
d__Bacteria	k__norank_d__Bacteria	p__Firmicutes	c__Bacilli	o__Staphylococcales	f__Staphylococcaceae	g__Staphylococcus	s__Staphylococcus_sciuri	OTU694	0	0	0	0	0	0	0	0	0	1	1
d__Bacteria	k__norank_d__Bacteria	p__Actinobacteriota	c__Actinobacteria	o__Propionibacteriales	f__Nocardioidaceae	g__Nocardioides	s__Nocardioides_sp._g__Nocardioides	OTU700	0	0	0	0	0	0	0	0	0	1	1
d__Bacteria	k__norank_d__Bacteria	p__Bacteroidota	c__Bacteroidia	o__Flavobacteriales	f__Weeksellaceae	g__unclassified_f__Weeksellaceae	s__unclassified_f__Weeksellaceae	OTU271	0	0	0	0	0	0	0	1	0	1	2
d__Bacteria	k__norank_d__Bacteria	p__Firmicutes	c__Clostridia	o__Peptostreptococcales-Tissierellales	f__Anaerovoracaceae	g__Eubacterium_brachy_group	s__uncultured_bacterium_g__Eubacterium_brachy_group	OTU803	0	0	0	0	1	2	0	1	0	1	5
d__Bacteria	k__norank_d__Bacteria	p__Actinobacteriota	c__Thermoleophilia	o__Solirubrobacterales	f__Solirubrobacteraceae	g__norank_f__Solirubrobacteraceae	s__soil_metagenome_g__norank_f__Solirubrobacteraceae	OTU214	0	6	1	0	1	1	0	1	0	0	10
d__Bacteria	k__norank_d__Bacteria	p__Bacteroidota	c__Bacteroidia	o__Chitinophagales	f__Chitinophagaceae	g__unclassified_f__Chitinophagaceae	s__unclassified_f__Chitinophagaceae	OTU430	0	0	0	0	0	0	2	0	0	0	2
d__Bacteria	k__norank_d__Bacteria	p__Actinobacteriota	c__Actinobacteria	o__Micrococcales	f__Intrasporangiaceae	g__unclassified_f__Intrasporangiaceae	s__unclassified_f__Intrasporangiaceae	OTU169	0	7	0	0	0	0	0	0	0	0	7
d__Bacteria	k__norank_d__Bacteria	p__Chloroflexi	c__KD4-96	o__norank_c__KD4-96	f__norank_o__norank_c__KD4-96	g__norank_f__norank_o__norank_c__KD4-96	s__metagenome_g__norank_f__norank_o__norank_c__KD4-96	OTU49	0	0	0	0	0	2	0	1	2	0	5
d__Bacteria	k__norank_d__Bacteria	p__Bacteroidota	c__Bacteroidia	o__Bacteroidales	f__Prolixibacteraceae	g__Roseimarinus	s__uncultured_bacterium_g__Roseimarinus	OTU1168	1743	575	0	0	261	105	1304	61	0	1441	5490
d__Bacteria	k__norank_d__Bacteria	p__Acidobacteriota	c__Vicinamibacteria	o__Vicinamibacterales	f__norank_o__Vicinamibacterales	g__norank_f__norank_o__Vicinamibacterales	s__unclassified_g__norank_f__norank_o__Vicinamibacterales	OTU415	0	0	0	3	0	0	0	0	0	0	3
d__Bacteria	k__norank_d__Bacteria	p__Desulfobacterota	c__Syntrophobacteria	o__Syntrophobacterales	f__Syntrophobacteraceae	g__Syntrophobacter	s__uncultured_bacterium_g__Syntrophobacter	OTU60	0	0	0	0	0	3	0	1	0	0	4
d__Bacteria	k__norank_d__Bacteria	p__Firmicutes	c__Bacilli	o__Lactobacillales	f__Streptococcaceae	g__Lactovum	s__uncultured_bacterium_g__Lactovum	OTU367	72	687	21	99	24	572	16	61	3	313	1868
d__Bacteria	k__norank_d__Bacteria	p__Actinobacteriota	c__Coriobacteriia	o__OPB41	f__norank_o__OPB41	g__norank_f__norank_o__OPB41	s__unclassified_g__norank_f__norank_o__OPB41	OTU868	0	0	0	0	0	1	0	0	0	0	1
d__Bacteria	k__norank_d__Bacteria	p__Bacteroidota	c__Bacteroidia	o__Sphingobacteriales	f__Sphingobacteriaceae	g__Pedobacter	s__unclassified_g__Pedobacter	OTU414	0	0	0	3	0	0	0	0	0	0	3
d__Bacteria	k__norank_d__Bacteria	p__Patescibacteria	c__Berkelbacteria	o__norank_c__Berkelbacteria	f__norank_o__norank_c__Berkelbacteria	g__norank_f__norank_o__norank_c__Berkelbacteria	s__Berkelbacteria_bacterium_GW2011_GWE1_39_12	OTU858	0	0	0	0	0	1	0	0	0	0	1
d__Bacteria	k__norank_d__Bacteria	p__Proteobacteria	c__Alphaproteobacteria	o__Elsterales	f__norank_o__Elsterales	g__norank_f__norank_o__Elsterales	s__uncultured_bacterium_g__norank_f__norank_o__Elsterales	OTU426	0	8	2	0	0	0	2	0	2	0	14
d__Bacteria	k__norank_d__Bacteria	p__Actinobacteriota	c__Thermoleophilia	o__Gaiellales	f__norank_o__Gaiellales	g__norank_f__norank_o__Gaiellales	s__metagenome_g__norank_f__norank_o__Gaiellales	OTU217	0	2	0	0	0	6	0	4	0	7	19
d__Bacteria	k__norank_d__Bacteria	p__Proteobacteria	c__Alphaproteobacteria	o__Rickettsiales	f__Rickettsiaceae	g__Candidatus_Megaira	s__uncultured_bacterium_g__Candidatus_Megaira	OTU268	0	0	0	0	0	1	0	0	0	0	1
d__Bacteria	k__norank_d__Bacteria	p__Cyanobacteria	c__Cyanobacteriia	o__Chloroplast	f__norank_o__Chloroplast	g__norank_f__norank_o__Chloroplast	s__Oscillatoriales_cyanobacterium_HF1	OTU876	0	0	0	0	0	1	0	0	0	0	1
d__Bacteria	k__norank_d__Bacteria	p__Proteobacteria	c__Alphaproteobacteria	o__Rhizobiales	f__Rhizobiales_Incertae_Sedis	g__norank_f__Rhizobiales_Incertae_Sedis	s__metagenome_g__norank_f__Rhizobiales_Incertae_Sedis	OTU437	0	15	2	8	2	35	4	41	13	31	151
d__Bacteria	k__norank_d__Bacteria	p__Firmicutes	c__Clostridia	o__norank_c__Clostridia	f__Hungateiclostridiaceae	g__Ruminiclostridium	s__Ruminiclostridium_hungatei	OTU848	0	1	0	0	0	0	0	1	0	2	4
d__Bacteria	k__norank_d__Bacteria	p__Planctomycetota	c__Planctomycetes	o__Gemmatales	f__Gemmataceae	g__norank_f__Gemmataceae	s__uncultured_bacterium_g__norank_f__Gemmataceae	OTU179	0	2	0	0	0	0	0	0	0	0	2
d__Bacteria	k__norank_d__Bacteria	p__Firmicutes	c__Bacilli	o__Bacillales	f__Bacillaceae	g__Bacillus	s__Bacillus_gibsonii	OTU1156	0	0	0	0	0	0	0	0	0	3	3
d__Bacteria	k__norank_d__Bacteria	p__Bacteroidota	c__Bacteroidia	o__Flavobacteriales	f__unclassified_o__Flavobacteriales	g__unclassified_o__Flavobacteriales	s__unclassified_o__Flavobacteriales	OTU427	0	0	0	1	0	0	0	0	0	0	1
d__Bacteria	k__norank_d__Bacteria	p__Firmicutes	c__Bacilli	o__Erysipelotrichales	f__Erysipelotrichaceae	g__ZOR0006	s__uncultured_bacterium_g__ZOR0006	OTU1171	0	0	0	0	0	0	0	0	2	62	64
d__Bacteria	k__norank_d__Bacteria	p__Actinobacteriota	c__Actinobacteria	o__Frankiales	f__Acidothermaceae	g__Acidothermus	s__unclassified_g__Acidothermus	OTU405	0	2	0	0	0	0	2	1	0	0	5
d__Bacteria	k__norank_d__Bacteria	p__Planctomycetota	c__Planctomycetes	o__Isosphaerales	f__Isosphaeraceae	g__Aquisphaera	s__uncultured_planctomycete_g__Aquisphaera	OTU1041	0	0	0	0	0	0	0	0	5	0	5
d__Bacteria	k__norank_d__Bacteria	p__Proteobacteria	c__Alphaproteobacteria	o__Elsterales	f__norank_o__Elsterales	g__norank_f__norank_o__Elsterales	s__uncultured_bacterium_g__norank_f__norank_o__Elsterales	OTU192	0	3	0	0	0	0	0	0	0	0	3
d__Bacteria	k__norank_d__Bacteria	p__Patescibacteria	c__Parcubacteria	o__Candidatus_Kaiserbacteria	f__norank_o__Candidatus_Kaiserbacteria	g__norank_f__norank_o__Candidatus_Kaiserbacteria	s__unclassified_g__norank_f__norank_o__Candidatus_Kaiserbacteria	OTU194	0	5	0	0	0	0	0	0	0	0	5
d__Bacteria	k__norank_d__Bacteria	p__Cyanobacteria	c__Cyanobacteriia	o__Chloroplast	f__norank_o__Chloroplast	g__norank_f__norank_o__Chloroplast	s__unclassified_g__norank_f__norank_o__Chloroplast	OTU1150	0	43	1	0	0	178	0	12	0	24	258
d__Bacteria	k__norank_d__Bacteria	p__Actinobacteriota	c__Actinobacteria	o__Micrococcales	f__Promicromonosporaceae	g__Cellulosimicrobium	s__Cellulosimicrobium_cellulans_g__Cellulosimicrobium	OTU492	0	0	0	0	0	0	3	0	0	1	4
d__Bacteria	k__norank_d__Bacteria	p__Myxococcota	c__Polyangia	o__Polyangiales	f__BIrii41	g__norank_f__BIrii41	s__metagenome_g__norank_f__BIrii41	OTU964	0	1	0	0	0	0	1	0	0	0	2
d__Bacteria	k__norank_d__Bacteria	p__Firmicutes	c__Limnochordia	o__norank_c__Limnochordia	f__norank_o__norank_c__Limnochordia	g__Hydrogenispora	s__uncultured_bacterium_g__Hydrogenispora	OTU772	0	0	0	0	0	1	0	0	0	2	3
d__Bacteria	k__norank_d__Bacteria	p__Bacteroidota	c__Bacteroidia	o__Chitinophagales	f__Chitinophagaceae	g__Terrimonas	s__uncultured_bacterium_g__Terrimonas	OTU493	0	0	0	0	0	0	0	1	0	0	1
d__Bacteria	k__norank_d__Bacteria	p__Actinobacteriota	c__Actinobacteria	o__Propionibacteriales	f__Nocardioidaceae	g__Nocardioides	s__unclassified_g__Nocardioides	OTU839	0	0	0	0	1	0	0	0	0	0	1
d__Bacteria	k__norank_d__Bacteria	p__Proteobacteria	c__Gammaproteobacteria	o__Enterobacterales	f__Budviciaceae	g__Pragia	s__bacterium_TSA241-4	OTU1056	0	0	0	0	0	0	0	1	1	2	4
d__Bacteria	k__norank_d__Bacteria	p__Firmicutes	c__Bacilli	o__Lactobacillales	f__Lactobacillaceae	g__Lactobacillus	s__Lactobacillus_plantarum_g__Lactobacillus	OTU418	0	6	0	1	2	2	1	0	1	0	13
d__Bacteria	k__norank_d__Bacteria	p__Actinobacteriota	c__MB-A2-108	o__norank_c__MB-A2-108	f__norank_o__norank_c__MB-A2-108	g__norank_f__norank_o__norank_c__MB-A2-108	s__uncultured_bacterium_g__norank_f__norank_o__norank_c__MB-A2-108	OTU2	0	0	0	0	0	3	0	0	0	0	3
d__Bacteria	k__norank_d__Bacteria	p__Cyanobacteria	c__Cyanobacteriia	o__Chloroplast	f__norank_o__Chloroplast	g__norank_f__norank_o__Chloroplast	s__unclassified_g__norank_f__norank_o__Chloroplast	OTU238	0	0	0	0	0	2	0	0	0	1	3
d__Bacteria	k__norank_d__Bacteria	p__Firmicutes	c__Bacilli	o__Erysipelotrichales	f__Erysipelotrichaceae	g__ZOR0006	s__uncultured_bacterium_g__ZOR0006	OTU187	905	4687	651	949	208	2312	229	815	3945	3389	18090
d__Bacteria	k__norank_d__Bacteria	p__Acidobacteriota	c__Holophagae	o__Subgroup_7	f__norank_o__Subgroup_7	g__norank_f__norank_o__Subgroup_7	s__uncultured_Acidobacteria_bacterium_g__norank_f__norank_o__Subgroup_7	OTU412	0	0	0	2	0	0	0	0	0	0	2
d__Bacteria	k__norank_d__Bacteria	p__Planctomycetota	c__Planctomycetes	o__Gemmatales	f__Gemmataceae	g__norank_f__Gemmataceae	s__uncultured_prokaryote_g__norank_f__Gemmataceae	OTU469	0	0	0	0	0	1	0	1	0	1	3
d__Bacteria	k__norank_d__Bacteria	p__Firmicutes	c__Clostridia	o__Peptostreptococcales-Tissierellales	f__Anaerovoracaceae	g__Anaerovorax	s__unclassified_g__Anaerovorax	OTU958	0	0	0	0	0	0	1	0	0	0	1
d__Bacteria	k__norank_d__Bacteria	p__Proteobacteria	c__Alphaproteobacteria	o__Micropepsales	f__Micropepsaceae	g__norank_f__Micropepsaceae	s__metagenome_g__norank_f__Micropepsaceae	OTU218	0	4	0	0	0	0	0	0	3	0	7
d__Bacteria	k__norank_d__Bacteria	p__Patescibacteria	c__Saccharimonadia	o__Saccharimonadales	f__norank_o__Saccharimonadales	g__norank_f__norank_o__Saccharimonadales	s__uncultured_bacterium_g__norank_f__norank_o__Saccharimonadales	OTU336	0	1	0	0	0	0	0	0	0	0	1
d__Bacteria	k__norank_d__Bacteria	p__Proteobacteria	c__Alphaproteobacteria	o__Acetobacterales	f__Acetobacteraceae	g__norank_f__Acetobacteraceae	s__metagenome_g__norank_f__Acetobacteraceae	OTU46	3	0	0	0	0	0	3	0	0	0	6
d__Bacteria	k__norank_d__Bacteria	p__Bacteroidota	c__Bacteroidia	o__Bacteroidales	f__Tannerellaceae	g__Parabacteroides	s__unclassified_g__Parabacteroides	OTU1083	3192	1627	68	1	103	2	8855	173	8	469	14498
d__Bacteria	k__norank_d__Bacteria	p__Actinobacteriota	c__Actinobacteria	o__Frankiales	f__norank_o__Frankiales	g__norank_f__norank_o__Frankiales	s__uncultured_bacterium_g__norank_f__norank_o__Frankiales	OTU380	1	1	0	0	1	2	0	0	0	4	9
d__Bacteria	k__norank_d__Bacteria	p__Proteobacteria	c__Gammaproteobacteria	o__Xanthomonadales	f__Xanthomonadaceae	g__unclassified_f__Xanthomonadaceae	s__unclassified_f__Xanthomonadaceae	OTU861	0	0	0	0	0	1	0	0	0	0	1
d__Bacteria	k__norank_d__Bacteria	p__Proteobacteria	c__Gammaproteobacteria	o__Enterobacterales	f__Enterobacteriaceae	g__Citrobacter	s__Citrobacter_freundii_g__Citrobacter	OTU168	5	57	0	0	0	109	16	1	5	1	194
d__Bacteria	k__norank_d__Bacteria	p__Proteobacteria	c__Alphaproteobacteria	o__Sphingomonadales	f__Sphingomonadaceae	g__Sphingomonas	s__uncultured_Sphingomonadaceae_bacterium_g__Sphingomonas	OTU906	0	3	0	0	0	1	1	0	5	2	12
d__Bacteria	k__norank_d__Bacteria	p__Chloroflexi	c__Anaerolineae	o__norank_c__Anaerolineae	f__norank_o__norank_c__Anaerolineae	g__norank_f__norank_o__norank_c__Anaerolineae	s__uncultured_bacterium_g__norank_f__norank_o__norank_c__Anaerolineae	OTU785	0	0	0	0	0	2	0	2	0	0	4
d__Bacteria	k__norank_d__Bacteria	p__Cyanobacteria	c__Cyanobacteriia	o__Chloroplast	f__norank_o__Chloroplast	g__norank_f__norank_o__Chloroplast	s__unclassified_g__norank_f__norank_o__Chloroplast	OTU448	0	0	0	0	0	1	0	0	0	0	1
d__Bacteria	k__norank_d__Bacteria	p__Bacteroidota	c__Bacteroidia	o__Flavobacteriales	f__Weeksellaceae	g__Empedobacter	s__uncultured_bacterium_g__Empedobacter	OTU462	0	1	0	0	0	0	0	0	0	1	2
d__Bacteria	k__norank_d__Bacteria	p__Firmicutes	c__Bacilli	o__Exiguobacterales	f__Exiguobacteraceae	g__Exiguobacterium	s__Exiguobacterium_indicum	OTU885	0	11	1	0	2	3	4	1	6	221	249
d__Bacteria	k__norank_d__Bacteria	p__Firmicutes	c__Bacilli	o__Mycoplasmatales	f__Mycoplasmataceae	g__norank_f__Mycoplasmataceae	s__uncultured_Firmicutes_bacterium_g__norank_f__Mycoplasmataceae	OTU1105	29	201	4	136	21	0	7	118	70	273	859
d__Bacteria	k__norank_d__Bacteria	p__Firmicutes	c__Bacilli	o__Mycoplasmatales	f__Mycoplasmataceae	g__Candidatus_Bacilloplasma	s__uncultured_bacterium_g__Candidatus_Bacilloplasma	OTU891	0	9	0	0	0	11	0	0	0	0	20
d__Bacteria	k__norank_d__Bacteria	p__Bacteroidota	c__Bacteroidia	o__Cytophagales	f__Spirosomaceae	g__unclassified_f__Spirosomaceae	s__unclassified_f__Spirosomaceae	OTU204	0	3	0	0	0	0	0	0	0	1	4
d__Bacteria	k__norank_d__Bacteria	p__Verrucomicrobiota	c__Verrucomicrobiae	o__Verrucomicrobiales	f__Verrucomicrobiaceae	g__norank_f__Verrucomicrobiaceae	s__uncultured_soil_bacterium_g__norank_f__Verrucomicrobiaceae	OTU890	0	0	0	0	0	12	0	0	0	3	15
d__Bacteria	k__norank_d__Bacteria	p__Chloroflexi	c__Anaerolineae	o__SJA-15	f__norank_o__SJA-15	g__norank_f__norank_o__SJA-15	s__uncultured_soil_bacterium_g__norank_f__norank_o__SJA-15	OTU1116	0	0	0	0	0	1	0	0	0	1	2
d__Bacteria	k__norank_d__Bacteria	p__Proteobacteria	c__Gammaproteobacteria	o__Burkholderiales	f__Chitinibacteraceae	g__Chitinilyticum	s__unclassified_g__Chitinilyticum	OTU171	0	62	0	0	0	0	0	0	0	0	62
d__Bacteria	k__norank_d__Bacteria	p__Patescibacteria	c__Saccharimonadia	o__Saccharimonadales	f__unclassified_o__Saccharimonadales	g__unclassified_o__Saccharimonadales	s__unclassified_o__Saccharimonadales	OTU590	0	1	0	0	0	0	0	0	0	1	2
d__Bacteria	k__norank_d__Bacteria	p__Patescibacteria	c__Saccharimonadia	o__Saccharimonadales	f__unclassified_o__Saccharimonadales	g__unclassified_o__Saccharimonadales	s__unclassified_o__Saccharimonadales	OTU1020	0	2	0	0	0	9	0	2	0	1	14
d__Bacteria	k__norank_d__Bacteria	p__Acidobacteriota	c__Acidobacteriae	o__Bryobacterales	f__Bryobacteraceae	g__Bryobacter	s__uncultured_Acidobacteria_bacterium_g__Bryobacter	OTU369	0	0	0	0	1	0	0	0	0	0	1
d__Bacteria	k__norank_d__Bacteria	p__Nitrospinota	c__P9X2b3D02	o__norank_c__P9X2b3D02	f__norank_o__norank_c__P9X2b3D02	g__norank_f__norank_o__norank_c__P9X2b3D02	s__uncultured_prokaryote_g__norank_f__norank_o__norank_c__P9X2b3D02	OTU81	0	0	0	0	0	0	0	1	0	0	1
d__Bacteria	k__norank_d__Bacteria	p__Proteobacteria	c__Alphaproteobacteria	o__Sphingomonadales	f__Sphingomonadaceae	g__Altererythrobacter	s__unclassified_g__Altererythrobacter	OTU1060	0	1	0	0	0	0	0	0	0	0	1
d__Bacteria	k__norank_d__Bacteria	p__Chloroflexi	c__Anaerolineae	o__Caldilineales	f__Caldilineaceae	g__unclassified_f__Caldilineaceae	s__unclassified_f__Caldilineaceae	OTU998	0	0	0	0	0	2	0	0	0	0	2
d__Bacteria	k__norank_d__Bacteria	p__Proteobacteria	c__Alphaproteobacteria	o__Rhizobiales	f__Beijerinckiaceae	g__1174-901-12	s__uncultured_bacterium_g__1174-901-12	OTU162	0	2	0	0	0	0	0	0	0	0	2
d__Bacteria	k__norank_d__Bacteria	p__Patescibacteria	c__Saccharimonadia	o__Saccharimonadales	f__norank_o__Saccharimonadales	g__norank_f__norank_o__Saccharimonadales	s__uncultured_bacterium_SBR2060	OTU425	0	0	0	2	0	0	2	0	0	0	4
d__Bacteria	k__norank_d__Bacteria	p__Bacteroidota	c__Bacteroidia	o__Bacteroidales	f__Prolixibacteraceae	g__BSV13	s__uncultured_bacterium_g__BSV13	OTU583	0	0	0	0	2	0	0	0	0	0	2
d__Bacteria	k__norank_d__Bacteria	p__Firmicutes	c__Clostridia	o__Clostridiales	f__Clostridiaceae	g__Clostridium_sensu_stricto_1	s__unclassified_g__Clostridium_sensu_stricto_1	OTU1057	0	5	0	2	1	5	1	9	0	4	27
d__Bacteria	k__norank_d__Bacteria	p__Firmicutes	c__Clostridia	o__Clostridiales	f__Clostridiaceae	g__Clostridium_sensu_stricto_1	s__unclassified_g__Clostridium_sensu_stricto_1	OTU1055	0	1	0	2	0	6	2	7	1	2	21
d__Bacteria	k__norank_d__Bacteria	p__Gemmatimonadota	c__Gemmatimonadetes	o__Gemmatimonadales	f__Gemmatimonadaceae	g__norank_f__Gemmatimonadaceae	s__unclassified_g__norank_f__Gemmatimonadaceae	OTU201	0	4	0	0	0	0	0	0	0	0	4
d__Bacteria	k__norank_d__Bacteria	p__Firmicutes	c__Clostridia	o__Lachnospirales	f__Lachnospiraceae	g__Tyzzerella	s__unclassified_g__Tyzzerella	OTU845	201	62	19	42	22	547	95	1414	32	123	2557
d__Bacteria	k__norank_d__Bacteria	p__Proteobacteria	c__Alphaproteobacteria	o__Rickettsiales	f__Mitochondria	g__norank_f__Mitochondria	s__unclassified_g__norank_f__Mitochondria	OTU209	0	2	0	0	0	8	0	0	0	0	10
d__Bacteria	k__norank_d__Bacteria	p__Proteobacteria	c__Alphaproteobacteria	o__unclassified_c__Alphaproteobacteria	f__unclassified_c__Alphaproteobacteria	g__unclassified_c__Alphaproteobacteria	s__unclassified_c__Alphaproteobacteria	OTU221	0	2	0	0	0	0	0	0	0	0	2
d__Bacteria	k__norank_d__Bacteria	p__Actinobacteriota	c__Actinobacteria	o__Propionibacteriales	f__Nocardioidaceae	g__Nocardioides	s__unclassified_g__Nocardioides	OTU484	0	0	0	0	0	2	0	0	0	4	6
d__Bacteria	k__norank_d__Bacteria	p__Chloroflexi	c__Anaerolineae	o__SJA-15	f__norank_o__SJA-15	g__norank_f__norank_o__SJA-15	s__uncultured_bacterium_g__norank_f__norank_o__SJA-15	OTU507	0	0	0	0	0	0	0	0	0	1	1
d__Bacteria	k__norank_d__Bacteria	p__Actinobacteriota	c__Thermoleophilia	o__Solirubrobacterales	f__Solirubrobacteraceae	g__Conexibacter	s__uncultured_bacterium_g__Conexibacter	OTU580	0	0	0	0	2	0	0	0	0	0	2
d__Bacteria	k__norank_d__Bacteria	p__Actinobacteriota	c__Actinobacteria	o__Micrococcales	f__Microbacteriaceae	g__Candidatus_Aquiluna	s__uncultured_bacterium_g__Candidatus_Aquiluna	OTU25	0	0	0	0	0	0	0	2	0	0	2
d__Bacteria	k__norank_d__Bacteria	p__Actinobacteriota	c__Actinobacteria	o__Propionibacteriales	f__Propionibacteriaceae	g__unclassified_f__Propionibacteriaceae	s__unclassified_f__Propionibacteriaceae	OTU921	0	0	0	0	0	0	0	0	1	0	1
d__Bacteria	k__norank_d__Bacteria	p__Actinobacteriota	c__Actinobacteria	o__Frankiales	f__Sporichthyaceae	g__hgcI_clade	s__uncultured_bacterium_g__hgcI_clade	OTU593	0	2	0	0	0	1	0	0	0	1	4
d__Bacteria	k__norank_d__Bacteria	p__Actinobacteriota	c__Acidimicrobiia	o__Microtrichales	f__Ilumatobacteraceae	g__CL500-29_marine_group	s__uncultured_bacterium_g__CL500-29_marine_group	OTU535	0	1	0	0	0	0	1	2	2	1	7
d__Bacteria	k__norank_d__Bacteria	p__Proteobacteria	c__Gammaproteobacteria	o__unclassified_c__Gammaproteobacteria	f__unclassified_c__Gammaproteobacteria	g__unclassified_c__Gammaproteobacteria	s__unclassified_c__Gammaproteobacteria	OTU185	0	3	0	0	0	0	0	0	0	0	3
d__Bacteria	k__norank_d__Bacteria	p__Firmicutes	c__Bacilli	o__Paenibacillales	f__Paenibacillaceae	g__Paenibacillus	s__unclassified_g__Paenibacillus	OTU175	0	1	0	0	0	5	0	0	0	0	6
d__Bacteria	k__norank_d__Bacteria	p__Proteobacteria	c__Gammaproteobacteria	o__Burkholderiales	f__Comamonadaceae	g__Delftia	s__Delftia_tsuruhatensis	OTU677	0	1	0	0	0	0	0	0	0	0	1
d__Bacteria	k__norank_d__Bacteria	p__Firmicutes	c__Bacilli	o__Entomoplasmatales	f__Entomoplasmatales_Incertae_Sedis	g__Candidatus_Hepatoplasma	s__uncultured_Entomoplasmatales_bacterium_g__Candidatus_Hepatoplasma	OTU180	1	4	0	0	3	0	0	0	0	6	14
d__Bacteria	k__norank_d__Bacteria	p__Proteobacteria	c__Gammaproteobacteria	o__Pseudomonadales	f__Pseudomonadaceae	g__Pseudomonas	s__unclassified_g__Pseudomonas	OTU766	0	4	0	0	0	0	0	0	0	0	4
d__Bacteria	k__norank_d__Bacteria	p__Chloroflexi	c__Chloroflexia	o__Thermomicrobiales	f__JG30-KF-CM45	g__norank_f__JG30-KF-CM45	s__metagenome_g__norank_f__JG30-KF-CM45	OTU100	0	0	0	0	0	1	0	0	0	0	1
d__Bacteria	k__norank_d__Bacteria	p__Actinobacteriota	c__Actinobacteria	o__Corynebacteriales	f__Mycobacteriaceae	g__Mycobacterium	s__uncultured_bacterium_g__Mycobacterium	OTU19	2	6	0	0	0	7	1	4	9	4	33
d__Bacteria	k__norank_d__Bacteria	p__Proteobacteria	c__Gammaproteobacteria	o__Competibacterales	f__Competibacteraceae	g__Candidatus_Competibacter	s__uncultured_bacterium_g__Candidatus_Competibacter	OTU872	0	0	0	0	0	1	0	0	0	0	1
d__Bacteria	k__norank_d__Bacteria	p__Patescibacteria	c__Saccharimonadia	o__Saccharimonadales	f__norank_o__Saccharimonadales	g__norank_f__norank_o__Saccharimonadales	s__unclassified_g__norank_f__norank_o__Saccharimonadales	OTU200	0	1	0	0	0	0	0	0	0	0	1
d__Bacteria	k__norank_d__Bacteria	p__Patescibacteria	c__ABY1	o__unclassified_c__ABY1	f__unclassified_c__ABY1	g__unclassified_c__ABY1	s__unclassified_c__ABY1	OTU272	0	0	0	0	0	0	0	1	0	0	1
d__Bacteria	k__norank_d__Bacteria	p__Firmicutes	c__Clostridia	o__Clostridiales	f__Clostridiaceae	g__Clostridium_sensu_stricto_1	s__uncultured_Clostridium_sp._g__Clostridium_sensu_stricto_1	OTU161	0	11	0	0	0	0	0	0	0	0	11
d__Bacteria	k__norank_d__Bacteria	p__Proteobacteria	c__Gammaproteobacteria	o__Methylococcales	f__Methylococcaceae	g__Methyloparacoccus	s__metagenome_g__Methyloparacoccus	OTU101	0	0	0	0	0	1	0	1	0	0	2
d__Bacteria	k__norank_d__Bacteria	p__Actinobacteriota	c__Acidimicrobiia	o__Actinomarinales	f__norank_o__Actinomarinales	g__norank_f__norank_o__Actinomarinales	s__unclassified_g__norank_f__norank_o__Actinomarinales	OTU512	0	0	0	0	0	3	0	6	0	0	9
d__Bacteria	k__norank_d__Bacteria	p__Acidobacteriota	c__Acidobacteriae	o__Solibacterales	f__Solibacteraceae	g__Candidatus_Solibacter	s__unclassified_g__Candidatus_Solibacter	OTU432	0	1	0	0	1	0	0	0	0	0	2
d__Bacteria	k__norank_d__Bacteria	p__Chloroflexi	c__KD4-96	o__norank_c__KD4-96	f__norank_o__norank_c__KD4-96	g__norank_f__norank_o__norank_c__KD4-96	s__metagenome_g__norank_f__norank_o__norank_c__KD4-96	OTU393	0	0	0	0	0	0	0	1	0	0	1
d__Bacteria	k__norank_d__Bacteria	p__Firmicutes	c__Clostridia	o__Clostridia_UCG-014	f__norank_o__Clostridia_UCG-014	g__norank_f__norank_o__Clostridia_UCG-014	s__unclassified_g__norank_f__norank_o__Clostridia_UCG-014	OTU1029	0	0	0	0	0	0	0	3	0	0	3
d__Bacteria	k__norank_d__Bacteria	p__Bacteroidota	c__Kapabacteria	o__Kapabacteriales	f__norank_o__Kapabacteriales	g__norank_f__norank_o__Kapabacteriales	s__uncultured_bacterium_g__norank_f__norank_o__Kapabacteriales	OTU1070	0	0	0	0	0	0	0	0	0	1	1
d__Bacteria	k__norank_d__Bacteria	p__Chloroflexi	c__Anaerolineae	o__Anaerolineales	f__Anaerolineaceae	g__RBG-16-58-14	s__uncultured_bacterium_g__RBG-16-58-14	OTU789	0	0	0	0	0	4	0	1	0	0	5
d__Bacteria	k__norank_d__Bacteria	p__Chloroflexi	c__Anaerolineae	o__Anaerolineales	f__Anaerolineaceae	g__norank_f__Anaerolineaceae	s__unclassified_g__norank_f__Anaerolineaceae	OTU1121	0	0	0	0	0	1	0	0	0	0	1
d__Bacteria	k__norank_d__Bacteria	p__Planctomycetota	c__Planctomycetes	o__Gemmatales	f__Gemmataceae	g__norank_f__Gemmataceae	s__bacterium_enrichment_culture_clone_B1452011	OTU516	0	0	0	0	0	0	0	0	1	0	1
d__Bacteria	k__norank_d__Bacteria	p__Proteobacteria	c__Gammaproteobacteria	o__Xanthomonadales	f__Xanthomonadaceae	g__Luteimonas	s__uncultured_Lysobacter_sp._g__Luteimonas	OTU944	0	1	0	0	0	0	0	0	0	0	1
d__Bacteria	k__norank_d__Bacteria	p__Patescibacteria	c__Saccharimonadia	o__Saccharimonadales	f__norank_o__Saccharimonadales	g__norank_f__norank_o__Saccharimonadales	s__uncultured_bacterium_g__norank_f__norank_o__Saccharimonadales	OTU473	0	0	0	0	0	1	0	0	0	0	1
d__Bacteria	k__norank_d__Bacteria	p__Firmicutes	c__Bacilli	o__Bacillales	f__Bacillaceae	g__Bacillus	s__Bacillus_anthracis_g__Bacillus	OTU1039	0	0	0	0	0	1	0	1	0	0	2
d__Bacteria	k__norank_d__Bacteria	p__Chloroflexi	c__Anaerolineae	o__Anaerolineales	f__Anaerolineaceae	g__norank_f__Anaerolineaceae	s__unclassified_g__norank_f__Anaerolineaceae	OTU779	0	0	0	0	0	0	0	1	0	0	1
d__Bacteria	k__norank_d__Bacteria	p__Proteobacteria	c__Alphaproteobacteria	o__Caulobacterales	f__Caulobacteraceae	g__norank_f__Caulobacteraceae	s__uncultured_bacterium_g__norank_f__Caulobacteraceae	OTU869	1	2	0	3	3	2	7	2	16	3	39
d__Bacteria	k__norank_d__Bacteria	p__Actinobacteriota	c__Acidimicrobiia	o__IMCC26256	f__norank_o__IMCC26256	g__norank_f__norank_o__IMCC26256	s__uncultured_Acidimicrobiia_bacterium_g__norank_f__norank	OTU599	0	0	0	0	0	1	0	1	0	0	2
d__Bacteria	k__norank_d__Bacteria	p__Proteobacteria	c__Alphaproteobacteria	o__Rhizobiales	f__Xanthobacteraceae	g__Pseudorhodoplanes	s__uncultured_bacterium_g__Pseudorhodoplanes	OTU22	0	1	0	0	0	1	0	1	0	1	4
d__Bacteria	k__norank_d__Bacteria	p__Chloroflexi	c__Anaerolineae	o__Caldilineales	f__Caldilineaceae	g__norank_f__Caldilineaceae	s__metagenome_g__norank_f__Caldilineaceae	OTU735	0	2	0	1	0	1	0	0	1	0	5
d__Bacteria	k__norank_d__Bacteria	p__Chloroflexi	c__Anaerolineae	o__SBR1031	f__A4b	g__norank_f__A4b	s__uncultured_bacterium_g__norank_f__A4b	OTU801	0	0	0	0	0	0	1	0	0	0	1
d__Bacteria	k__norank_d__Bacteria	p__Proteobacteria	c__Gammaproteobacteria	o__Aeromonadales	f__Aeromonadaceae	g__Aeromonas	s__Aeromonas_caviae	OTU960	386	92	113	2	56	66	9687	88	0	34	10524
d__Bacteria	k__norank_d__Bacteria	p__Acidobacteriota	c__Acidobacteriae	o__Solibacterales	f__Solibacteraceae	g__Candidatus_Solibacter	s__uncultured_Acidobacteria_bacterium_g__Candidatus_Solibacter	OTU1042	0	1	0	3	0	0	1	0	5	0	10
d__Bacteria	k__norank_d__Bacteria	p__Actinobacteriota	c__Actinobacteria	o__unclassified_c__Actinobacteria	f__unclassified_c__Actinobacteria	g__unclassified_c__Actinobacteria	s__unclassified_c__Actinobacteria	OTU545	0	0	0	1	0	2	0	6	1	0	10
d__Bacteria	k__norank_d__Bacteria	p__Acidobacteriota	c__Vicinamibacteria	o__Vicinamibacterales	f__Vicinamibacteraceae	g__norank_f__Vicinamibacteraceae	s__unclassified_g__norank_f__Vicinamibacteraceae	OTU291	0	0	0	0	0	0	0	0	0	1	1
d__Bacteria	k__norank_d__Bacteria	p__Patescibacteria	c__Saccharimonadia	o__Saccharimonadales	f__norank_o__Saccharimonadales	g__norank_f__norank_o__Saccharimonadales	s__uncultured_Candidatus_Saccharibacteria_bacterium_g__norank_f__norank	OTU1134	0	1	0	0	0	0	0	0	0	0	1
d__Bacteria	k__norank_d__Bacteria	p__Chloroflexi	c__Anaerolineae	o__Anaerolineales	f__Anaerolineaceae	g__unclassified_f__Anaerolineaceae	s__unclassified_f__Anaerolineaceae	OTU662	0	0	0	0	0	1	0	0	0	0	1
d__Bacteria	k__norank_d__Bacteria	p__Bacteroidota	c__Kapabacteria	o__Kapabacteriales	f__norank_o__Kapabacteriales	g__norank_f__norank_o__Kapabacteriales	s__uncultured_bacterium_g__norank_f__norank_o__Kapabacteriales	OTU197	0	5	1	0	1	0	0	0	0	2	9
d__Bacteria	k__norank_d__Bacteria	p__Desulfobacterota	c__Desulfobulbia	o__Desulfobulbales	f__Desulfobulbaceae	g__norank_f__Desulfobulbaceae	s__uncultured_bacterium_g__norank_f__Desulfobulbaceae	OTU447	0	0	0	0	0	1	0	0	0	0	1
d__Bacteria	k__norank_d__Bacteria	p__Firmicutes	c__Clostridia	o__Lachnospirales	f__Lachnospiraceae	g__Butyrivibrio	s__unclassified_g__Butyrivibrio	OTU1030	0	0	0	0	0	0	0	19	0	1	20
d__Bacteria	k__norank_d__Bacteria	p__Cyanobacteria	c__Cyanobacteriia	o__Cyanobacteriales	f__Nostocaceae	g__Nostoc_PCC-8976	s__unclassified_g__Nostoc_PCC-8976	OTU1122	0	0	0	0	0	0	0	0	0	2	2
d__Bacteria	k__norank_d__Bacteria	p__Proteobacteria	c__Alphaproteobacteria	o__Rhizobiales	f__Xanthobacteraceae	g__Bradyrhizobium	s__unclassified_g__Bradyrhizobium	OTU322	0	26	0	6	3	1	4	0	3	1	44
d__Bacteria	k__norank_d__Bacteria	p__Actinobacteriota	c__Actinobacteria	o__Kineosporiales	f__Kineosporiaceae	g__Kineosporia	s__uncultured_bacterium_g__Kineosporia	OTU701	0	9	0	0	0	4	0	13	0	3	29
d__Bacteria	k__norank_d__Bacteria	p__Actinobacteriota	c__Actinobacteria	o__Micrococcales	f__Microbacteriaceae	g__Agromyces	s__unclassified_g__Agromyces	OTU1157	0	0	0	0	0	0	0	0	0	12	12
d__Bacteria	k__norank_d__Bacteria	p__Cyanobacteria	c__Cyanobacteriia	o__Chloroplast	f__norank_o__Chloroplast	g__norank_f__norank_o__Chloroplast	s__unclassified_g__norank_f__norank_o__Chloroplast	OTU406	0	0	0	0	0	0	0	1	0	0	1
d__Bacteria	k__norank_d__Bacteria	p__Cyanobacteria	c__Cyanobacteriia	o__Chloroplast	f__norank_o__Chloroplast	g__norank_f__norank_o__Chloroplast	s__unclassified_g__norank_f__norank_o__Chloroplast	OTU402	0	2	0	7	0	3	12	2	0	0	26
d__Bacteria	k__norank_d__Bacteria	p__Desulfobacterota	c__Syntrophobacteria	o__Syntrophobacterales	f__norank_o__Syntrophobacterales	g__norank_f__norank_o__Syntrophobacterales	s__uncultured_bacterium_g__norank_f__norank_o__Syntrophobacterales	OTU135	0	0	0	0	0	0	0	0	0	1	1
d__Bacteria	k__norank_d__Bacteria	p__Proteobacteria	c__Gammaproteobacteria	o__Cellvibrionales	f__Halieaceae	g__OM60NOR5_clade	s__uncultured_bacterium_g__OM60NOR5_clade	OTU213	0	1	0	0	0	0	0	1	0	0	2
d__Bacteria	k__norank_d__Bacteria	p__Proteobacteria	c__Gammaproteobacteria	o__norank_c__Gammaproteobacteria	f__norank_o__norank_c__Gammaproteobacteria	g__norank_f__norank_o__norank_c__Gammaproteobacteria	s__uncultured_organism_g__norank_f__norank_o__norank_c__Gammaproteobacteria	OTU41	0	0	0	0	0	1	0	0	0	0	1
d__Bacteria	k__norank_d__Bacteria	p__Firmicutes	c__Clostridia	o__norank_c__Clostridia	f__Hungateiclostridiaceae	g__unclassified_f__Hungateiclostridiaceae	s__unclassified_f__Hungateiclostridiaceae	OTU1152	0	0	0	0	0	0	0	0	0	20	20
d__Bacteria	k__norank_d__Bacteria	p__Actinobacteriota	c__Actinobacteria	o__Frankiales	f__Sporichthyaceae	g__hgcI_clade	s__uncultured_bacterium_g__hgcI_clade	OTU956	0	0	0	0	0	0	2	0	0	0	2
d__Bacteria	k__norank_d__Bacteria	p__unclassified_k__norank_d__Bacteria	c__unclassified_k__norank_d__Bacteria	o__unclassified_k__norank_d__Bacteria	f__unclassified_k__norank_d__Bacteria	g__unclassified_k__norank_d__Bacteria	s__unclassified_k__norank_d__Bacteria	OTU1022	0	0	0	0	0	0	0	1	0	0	1
d__Bacteria	k__norank_d__Bacteria	p__Proteobacteria	c__Alphaproteobacteria	o__Rhizobiales	f__Beijerinckiaceae	g__Methylobacterium-Methylorubrum	s__unclassified_g__Methylobacterium-Methylorubrum	OTU880	0	0	0	1	0	1	0	0	0	1	3
d__Bacteria	k__norank_d__Bacteria	p__Proteobacteria	c__Gammaproteobacteria	o__Burkholderiales	f__Rhodocyclaceae	g__Dechloromonas	s__uncultured_bacterium_g__Dechloromonas	OTU266	0	0	0	0	0	0	0	0	0	2	2
d__Bacteria	k__norank_d__Bacteria	p__Proteobacteria	c__Gammaproteobacteria	o__Burkholderiales	f__SC-I-84	g__norank_f__SC-I-84	s__uncultured_prokaryote_g__norank_f__SC-I-84	OTU740	0	1	0	0	0	3	0	1	0	0	5
d__Bacteria	k__norank_d__Bacteria	p__Patescibacteria	c__CPR2	o__norank_c__CPR2	f__norank_o__norank_c__CPR2	g__norank_f__norank_o__norank_c__CPR2	s__uncultured_bacterium_g__norank_f__norank_o__norank_c__CPR2	OTU903	0	1	0	0	0	0	0	1	0	4	6
d__Bacteria	k__norank_d__Bacteria	p__Firmicutes	c__Bacilli	o__Alicyclobacillales	f__Alicyclobacillaceae	g__Tumebacillus	s__uncultured_bacterium_g__Tumebacillus	OTU1153	0	0	0	0	0	0	0	0	0	1	1
d__Bacteria	k__norank_d__Bacteria	p__Actinobacteriota	c__Thermoleophilia	o__Solirubrobacterales	f__Solirubrobacteraceae	g__Conexibacter	s__uncultured_bacterium_g__Conexibacter	OTU942	0	0	0	0	0	1	0	0	0	0	1
d__Bacteria	k__norank_d__Bacteria	p__Acidobacteriota	c__Acidobacteriae	o__Bryobacterales	f__Bryobacteraceae	g__Bryobacter	s__metagenome_g__Bryobacter	OTU390	0	1	0	0	0	0	0	0	0	0	1
d__Bacteria	k__norank_d__Bacteria	p__Proteobacteria	c__Alphaproteobacteria	o__Rhizobiales	f__Hyphomicrobiaceae	g__Hyphomicrobium	s__unclassified_g__Hyphomicrobium	OTU875	0	4	0	0	0	3	0	4	0	6	17
d__Bacteria	k__norank_d__Bacteria	p__Proteobacteria	c__Gammaproteobacteria	o__Alteromonadales	f__Shewanellaceae	g__Shewanella	s__Shewanella_marisflavi	OTU636	0	0	0	0	0	2	0	0	0	4	6
d__Bacteria	k__norank_d__Bacteria	p__unclassified_k__norank_d__Bacteria	c__unclassified_k__norank_d__Bacteria	o__unclassified_k__norank_d__Bacteria	f__unclassified_k__norank_d__Bacteria	g__unclassified_k__norank_d__Bacteria	s__unclassified_k__norank_d__Bacteria	OTU658	0	0	0	0	0	1	0	0	0	0	1
d__Bacteria	k__norank_d__Bacteria	p__Acidobacteriota	c__Vicinamibacteria	o__Vicinamibacterales	f__Vicinamibacteraceae	g__norank_f__Vicinamibacteraceae	s__unclassified_g__norank_f__Vicinamibacteraceae	OTU24	0	0	0	0	0	0	0	0	0	1	1
d__Bacteria	k__norank_d__Bacteria	p__Armatimonadota	c__norank_p__Armatimonadota	o__norank_c__norank_p__Armatimonadota	f__norank_o__norank_c__norank_p__Armatimonadota	g__norank_f__norank_o__norank_c__norank_p__Armatimonadota	s__uncultured_bacterium_g__norank_f__norank_o__norank_c__norank_p__Armatimonadota	OTU103	0	0	0	0	0	1	0	0	0	0	1
d__Bacteria	k__norank_d__Bacteria	p__Chloroflexi	c__Anaerolineae	o__SBR1031	f__norank_o__SBR1031	g__norank_f__norank_o__SBR1031	s__unclassified_g__norank_f__norank_o__SBR1031	OTU831	0	1	0	0	0	1	0	0	0	0	2
d__Bacteria	k__norank_d__Bacteria	p__Chloroflexi	c__Anaerolineae	o__Anaerolineales	f__Anaerolineaceae	g__norank_f__Anaerolineaceae	s__unclassified_g__norank_f__Anaerolineaceae	OTU541	0	0	0	1	0	0	0	0	0	0	1
d__Bacteria	k__norank_d__Bacteria	p__Actinobacteriota	c__WCHB1-81	o__norank_c__WCHB1-81	f__norank_o__norank_c__WCHB1-81	g__norank_f__norank_o__norank_c__WCHB1-81	s__uncultured_bacterium_g__norank_f__norank_o__norank_c__WCHB1-81	OTU133	0	0	0	0	0	2	0	0	0	0	2
d__Bacteria	k__norank_d__Bacteria	p__Actinobacteriota	c__Thermoleophilia	o__Gaiellales	f__norank_o__Gaiellales	g__norank_f__norank_o__Gaiellales	s__unclassified_g__norank_f__norank_o__Gaiellales	OTU404	0	3	0	1	0	0	0	0	0	0	4
d__Bacteria	k__norank_d__Bacteria	p__Actinobacteriota	c__Thermoleophilia	o__Gaiellales	f__norank_o__Gaiellales	g__norank_f__norank_o__Gaiellales	s__unclassified_g__norank_f__norank_o__Gaiellales	OTU159	0	2	0	0	0	0	0	0	0	0	2
d__Bacteria	k__norank_d__Bacteria	p__Firmicutes	c__Bacilli	o__Erysipelotrichales	f__Erysipelotrichaceae	g__Dielma	s__uncultured_bacterium_g__Dielma	OTU258	0	0	0	0	0	3	0	0	0	1	4
d__Bacteria	k__norank_d__Bacteria	p__Chloroflexi	c__Anaerolineae	o__1-20	f__norank_o__1-20	g__norank_f__norank_o__1-20	s__uncultured_bacterium_g__norank_f__norank_o__1-20	OTU287	0	0	0	0	0	0	0	3	1	0	4
d__Bacteria	k__norank_d__Bacteria	p__Actinobacteriota	c__Actinobacteria	o__Kineosporiales	f__Kineosporiaceae	g__unclassified_f__Kineosporiaceae	s__unclassified_f__Kineosporiaceae	OTU102	0	13	1	7	2	0	3	10	0	2	38
d__Bacteria	k__norank_d__Bacteria	p__Bdellovibrionota	c__Bdellovibrionia	o__Bdellovibrionales	f__Bdellovibrionaceae	g__Bdellovibrio	s__uncultured_bacterium_g__Bdellovibrio	OTU224	0	3	0	0	0	0	0	0	0	0	3
d__Bacteria	k__norank_d__Bacteria	p__Chloroflexi	c__Chloroflexia	o__Thermomicrobiales	f__JG30-KF-CM45	g__norank_f__JG30-KF-CM45	s__unclassified_g__norank_f__JG30-KF-CM45	OTU1106	0	0	0	0	0	0	0	0	0	2	2
d__Bacteria	k__norank_d__Bacteria	p__Firmicutes	c__Clostridia	o__Christensenellales	f__Christensenellaceae	g__Christensenellaceae_R-7_group	s__unclassified_g__Christensenellaceae_R-7_group	OTU237	0	0	0	0	0	0	0	2	0	0	2
d__Bacteria	k__norank_d__Bacteria	p__Firmicutes	c__Clostridia	o__Lachnospirales	f__Lachnospiraceae	g__Tyzzerella	s__uncultured_bacterium_g__Tyzzerella	OTU949	42	43	32	0	0	131	5	6	5	83	347
d__Bacteria	k__norank_d__Bacteria	p__Firmicutes	c__Bacilli	o__Bacillales	f__Bacillaceae	g__Fictibacillus	s__Fictibacillus_arsenicus	OTU883	0	0	0	0	0	2	0	0	0	3	5
d__Bacteria	k__norank_d__Bacteria	p__unclassified_k__norank_d__Bacteria	c__unclassified_k__norank_d__Bacteria	o__unclassified_k__norank_d__Bacteria	f__unclassified_k__norank_d__Bacteria	g__unclassified_k__norank_d__Bacteria	s__unclassified_k__norank_d__Bacteria	OTU11	0	0	0	0	0	0	0	1	0	1	2
d__Bacteria	k__norank_d__Bacteria	p__Actinobacteriota	c__Acidimicrobiia	o__Microtrichales	f__Microtrichaceae	g__IMCC26207	s__unclassified_g__IMCC26207	OTU1172	0	3	0	0	0	0	0	0	0	5	8
d__Bacteria	k__norank_d__Bacteria	p__Proteobacteria	c__Alphaproteobacteria	o__Rhodobacterales	f__Rhodobacteraceae	g__Albimonas	s__uncultured_bacterium_g__Albimonas	OTU539	1	2	1	0	0	0	0	0	0	0	4
d__Bacteria	k__norank_d__Bacteria	p__Firmicutes	c__Clostridia	o__Lachnospirales	f__Lachnospiraceae	g__Lachnoclostridium	s__unclassified_g__Lachnoclostridium	OTU220	0	1	0	0	0	0	0	21	0	0	22
d__Bacteria	k__norank_d__Bacteria	p__Desulfobacterota	c__Syntrophobacteria	o__Syntrophobacterales	f__Syntrophobacteraceae	g__Desulfovirga	s__uncultured_bacterium_g__Desulfovirga	OTU232	0	0	0	0	0	1	0	1	0	0	2
d__Bacteria	k__norank_d__Bacteria	p__Proteobacteria	c__Gammaproteobacteria	o__Oceanospirillales	f__Halomonadaceae	g__Halomonas	s__Candidatus_Halomonas_phosphatis	OTU166	0	4	0	0	0	0	0	0	0	0	4
d__Bacteria	k__norank_d__Bacteria	p__Bacteroidota	c__Bacteroidia	o__Flavobacteriales	f__Weeksellaceae	g__norank_f__Weeksellaceae	s__uncultured_bacterium_g__norank_f__Weeksellaceae	OTU511	0	0	0	0	0	0	0	1	0	0	1
d__Bacteria	k__norank_d__Bacteria	p__Patescibacteria	c__CPR2	o__norank_c__CPR2	f__norank_o__norank_c__CPR2	g__norank_f__norank_o__norank_c__CPR2	s__uncultured_bacterium_g__norank_f__norank_o__norank_c__CPR2	OTU309	0	0	0	0	0	1	0	0	0	0	1
d__Bacteria	k__norank_d__Bacteria	p__Patescibacteria	c__Saccharimonadia	o__Saccharimonadales	f__norank_o__Saccharimonadales	g__norank_f__norank_o__Saccharimonadales	s__uncultured_bacterium_g__norank_f__norank_o__Saccharimonadales	OTU547	0	0	0	0	0	0	0	1	1	0	2
d__Bacteria	k__norank_d__Bacteria	p__Proteobacteria	c__Alphaproteobacteria	o__Paracaedibacterales	f__Paracaedibacteraceae	g__Candidatus_Paracaedibacter	s__uncultured_bacterium_g__Candidatus_Paracaedibacter	OTU663	0	0	0	0	1	0	0	0	0	0	1
d__Bacteria	k__norank_d__Bacteria	p__Actinobacteriota	c__Actinobacteria	o__PeM15	f__norank_o__PeM15	g__norank_f__norank_o__PeM15	s__unclassified_g__norank_f__norank_o__PeM15	OTU21	0	1	1	4	0	14	0	1	5	2	28
d__Bacteria	k__norank_d__Bacteria	p__Firmicutes	c__Bacilli	o__Lactobacillales	f__Lactobacillaceae	g__Lactobacillus	s__Lactobacillus_aviarius	OTU207	0	2	1	1	0	0	0	0	0	0	4
d__Bacteria	k__norank_d__Bacteria	p__Firmicutes	c__Bacilli	o__RF39	f__norank_o__RF39	g__norank_f__norank_o__RF39	s__unclassified_g__norank_f__norank_o__RF39	OTU259	36	0	5	3	0	4	16	30	0	22	116
d__Bacteria	k__norank_d__Bacteria	p__Proteobacteria	c__Gammaproteobacteria	o__Competibacterales	f__Competibacteraceae	g__Candidatus_Competibacter	s__uncultured_bacterium_g__Candidatus_Competibacter	OTU992	0	0	0	0	0	0	0	0	5	0	5
d__Bacteria	k__norank_d__Bacteria	p__Proteobacteria	c__Alphaproteobacteria	o__Rhodobacterales	f__Rhodobacteraceae	g__unclassified_f__Rhodobacteraceae	s__unclassified_f__Rhodobacteraceae	OTU786	0	0	0	0	0	0	0	1	0	0	1
d__Bacteria	k__norank_d__Bacteria	p__Verrucomicrobiota	c__Verrucomicrobiae	o__Verrucomicrobiales	f__Rubritaleaceae	g__Luteolibacter	s__unclassified_g__Luteolibacter	OTU270	0	0	0	0	0	1	0	0	0	0	1
d__Bacteria	k__norank_d__Bacteria	p__Firmicutes	c__Clostridia	o__Lachnospirales	f__Lachnospiraceae	g__unclassified_f__Lachnospiraceae	s__unclassified_f__Lachnospiraceae	OTU853	0	0	0	0	0	1	0	1	0	0	2
d__Bacteria	k__norank_d__Bacteria	p__Proteobacteria	c__Gammaproteobacteria	o__Legionellales	f__Legionellaceae	g__Legionella	s__uncultured_bacterium_g__Legionella	OTU592	0	0	0	0	0	2	0	0	0	0	2
d__Bacteria	k__norank_d__Bacteria	p__Firmicutes	c__Bacilli	o__Exiguobacterales	f__Exiguobacteraceae	g__Exiguobacterium	s__Exiguobacterium_sp._AT1b	OTU850	1	7	0	2	3	0	0	2	0	499	514
d__Bacteria	k__norank_d__Bacteria	p__Proteobacteria	c__Gammaproteobacteria	o__Pseudomonadales	f__Pseudomonadaceae	g__Pseudomonas	s__Pseudomonas_rhizosphaerae	OTU962	0	1	0	0	1	0	2	0	0	0	4
d__Bacteria	k__norank_d__Bacteria	p__Patescibacteria	c__Saccharimonadia	o__Saccharimonadales	f__norank_o__Saccharimonadales	g__norank_f__norank_o__Saccharimonadales	s__unclassified_g__norank_f__norank_o__Saccharimonadales	OTU725	0	0	0	0	0	0	0	5	0	0	5
d__Bacteria	k__norank_d__Bacteria	p__Actinobacteriota	c__WCHB1-81	o__norank_c__WCHB1-81	f__norank_o__norank_c__WCHB1-81	g__norank_f__norank_o__norank_c__WCHB1-81	s__uncultured_bacterium_g__norank_f__norank_o__norank_c__WCHB1-81	OTU4	0	0	0	0	0	0	0	1	0	0	1
d__Bacteria	k__norank_d__Bacteria	p__Proteobacteria	c__Alphaproteobacteria	o__Sphingomonadales	f__Sphingomonadaceae	g__Novosphingobium	s__uncultured_bacterium_g__Novosphingobium	OTU999	0	5	2	1	0	0	3	3	6	1	21
d__Bacteria	k__norank_d__Bacteria	p__Proteobacteria	c__Gammaproteobacteria	o__Pseudomonadales	f__Moraxellaceae	g__Acinetobacter	s__Acinetobacter_haemolyticus	OTU196	0	19	0	0	0	0	0	0	0	0	19
d__Bacteria	k__norank_d__Bacteria	p__Firmicutes	c__Negativicutes	o__Acidaminococcales	f__Acidaminococcaceae	g__Succinispira	s__Succinispira_mobilis_DSM_6222	OTU945	0	0	0	0	0	0	3	0	0	0	3
d__Bacteria	k__norank_d__Bacteria	p__Verrucomicrobiota	c__Verrucomicrobiae	o__Verrucomicrobiales	f__Rubritaleaceae	g__Luteolibacter	s__unclassified_g__Luteolibacter	OTU900	0	0	0	0	0	0	2	0	0	0	2
d__Bacteria	k__norank_d__Bacteria	p__Desulfobacterota	c__Desulfovibrionia	o__Desulfovibrionales	f__Desulfovibrionaceae	g__Desulfovibrio	s__Desulfovibrio_vulgaris_DP4	OTU955	0	0	0	0	0	0	25	0	0	0	25
d__Bacteria	k__norank_d__Bacteria	p__Proteobacteria	c__Alphaproteobacteria	o__norank_c__Alphaproteobacteria	f__norank_o__norank_c__Alphaproteobacteria	g__norank_f__norank_o__norank_c__Alphaproteobacteria	s__unclassified_g__norank_f__norank_o__norank_c__Alphaproteobacteria	OTU874	0	0	0	0	0	3	0	1	0	2	6
d__Bacteria	k__norank_d__Bacteria	p__Patescibacteria	c__Saccharimonadia	o__Saccharimonadales	f__norank_o__Saccharimonadales	g__norank_f__norank_o__Saccharimonadales	s__uncultured_bacterium_g__norank_f__norank_o__Saccharimonadales	OTU737	0	7	0	0	0	1	0	1	0	3	12
d__Bacteria	k__norank_d__Bacteria	p__Firmicutes	c__Clostridia	o__Clostridiales	f__Clostridiaceae	g__unclassified_f__Clostridiaceae	s__unclassified_f__Clostridiaceae	OTU10	0	0	0	0	0	0	0	0	0	1	1
d__Bacteria	k__norank_d__Bacteria	p__Actinobacteriota	c__Actinobacteria	o__PeM15	f__norank_o__PeM15	g__norank_f__norank_o__PeM15	s__metagenome_g__norank_f__norank_o__PeM15	OTU3	1	3	1	0	0	10	1	8	1	6	31
d__Bacteria	k__norank_d__Bacteria	p__Firmicutes	c__Clostridia	o__Lachnospirales	f__Lachnospiraceae	g__unclassified_f__Lachnospiraceae	s__unclassified_f__Lachnospiraceae	OTU866	0	0	0	0	0	27	0	13	0	5	45
d__Bacteria	k__norank_d__Bacteria	p__Proteobacteria	c__Gammaproteobacteria	o__Pseudomonadales	f__Moraxellaceae	g__Acinetobacter	s__unclassified_g__Acinetobacter	OTU652	0	1	0	0	0	1	1	0	0	0	3
d__Bacteria	k__norank_d__Bacteria	p__Acidobacteriota	c__Vicinamibacteria	o__Vicinamibacterales	f__norank_o__Vicinamibacterales	g__norank_f__norank_o__Vicinamibacterales	s__uncultured_soil_bacterium_g__norank_f__norank_o__Vicinamibacterales	OTU274	0	0	0	0	0	0	1	0	0	0	1
d__Bacteria	k__norank_d__Bacteria	p__Proteobacteria	c__Gammaproteobacteria	o__Cellvibrionales	f__Halieaceae	g__OM60NOR5_clade	s__uncultured_bacterium_g__OM60NOR5_clade	OTU177	0	1	0	0	0	0	0	0	0	0	1
d__Bacteria	k__norank_d__Bacteria	p__Patescibacteria	c__Saccharimonadia	o__Saccharimonadales	f__LWQ8	g__norank_f__LWQ8	s__uncultured_bacterium_g__norank_f__LWQ8	OTU602	0	1	0	0	0	0	5	2	62	0	70
d__Bacteria	k__norank_d__Bacteria	p__Proteobacteria	c__Gammaproteobacteria	o__Run-SP154	f__norank_o__Run-SP154	g__norank_f__norank_o__Run-SP154	s__metagenome_g__norank_f__norank_o__Run-SP154	OTU290	1	0	0	1	0	6	0	6	0	1	15
d__Bacteria	k__norank_d__Bacteria	p__Actinobacteriota	c__Actinobacteria	o__Frankiales	f__Sporichthyaceae	g__Longivirga	s__uncultured_bacterium_g__Longivirga	OTU696	0	1	0	0	0	1	0	0	0	0	2
d__Bacteria	k__norank_d__Bacteria	p__Firmicutes	c__Clostridia	o__Clostridiales	f__Clostridiaceae	g__unclassified_f__Clostridiaceae	s__unclassified_f__Clostridiaceae	OTU995	0	0	0	0	0	1	0	0	0	0	1
d__Bacteria	k__norank_d__Bacteria	p__Patescibacteria	c__Gracilibacteria	o__Absconditabacteriales_SR1	f__norank_o__Absconditabacteriales_SR1	g__norank_f__norank_o__Absconditabacteriales_SR1	s__unclassified_g__norank_f__norank_o__Absconditabacteriales_SR1	OTU385	0	0	0	0	0	0	1	0	0	0	1
d__Bacteria	k__norank_d__Bacteria	p__Actinobacteriota	c__Actinobacteria	o__Micrococcales	f__Intrasporangiaceae	g__unclassified_f__Intrasporangiaceae	s__unclassified_f__Intrasporangiaceae	OTU358	0	4	0	8	0	0	0	7	33	1	53
d__Bacteria	k__norank_d__Bacteria	p__Firmicutes	c__Clostridia	o__Clostridiales	f__Clostridiaceae	g__Clostridium_sensu_stricto_3	s__Clostridiaceae_bacterium_g__Clostridium_sensu_stricto_3	OTU79	0	0	0	0	0	0	0	1	0	0	1
d__Bacteria	k__norank_d__Bacteria	p__Proteobacteria	c__Gammaproteobacteria	o__Enterobacterales	f__Morganellaceae	g__Morganella	s__Morganella_morganii	OTU423	178	100	0	0	0	2	0	370	14	0	664
d__Bacteria	k__norank_d__Bacteria	p__Firmicutes	c__Bacilli	o__Bacillales	f__Bacillaceae	g__Bacillus	s__unclassified_g__Bacillus	OTU1063	0	1	0	0	0	0	0	0	0	0	1
d__Bacteria	k__norank_d__Bacteria	p__Proteobacteria	c__Alphaproteobacteria	o__Rhizobiales	f__Hyphomicrobiaceae	g__Hyphomicrobium	s__unclassified_g__Hyphomicrobium	OTU70	0	10	0	0	0	2	0	12	0	12	36
d__Bacteria	k__norank_d__Bacteria	p__Patescibacteria	c__Saccharimonadia	o__Saccharimonadales	f__Saccharimonadaceae	g__TM7a	s__uncultured_bacterium_g__TM7a	OTU792	0	0	0	1	0	1	0	0	2	2	6
d__Bacteria	k__norank_d__Bacteria	p__Actinobacteriota	c__Acidimicrobiia	o__IMCC26256	f__norank_o__IMCC26256	g__norank_f__norank_o__IMCC26256	s__uncultured_bacterium_g__norank_f__norank_o__IMCC26256	OTU42	1	0	0	0	0	0	0	0	0	1	2
d__Bacteria	k__norank_d__Bacteria	p__Firmicutes	c__Bacilli	o__RF39	f__norank_o__RF39	g__norank_f__norank_o__RF39	s__unclassified_g__norank_f__norank_o__RF39	OTU487	4	1	1	0	0	0	0	12	0	4	22
d__Bacteria	k__norank_d__Bacteria	p__Verrucomicrobiota	c__Verrucomicrobiae	o__Chthoniobacterales	f__Chthoniobacteraceae	g__LD29	s__uncultured_bacterium_g__LD29	OTU661	0	0	0	1	0	20	2	12	10	2	47
d__Bacteria	k__norank_d__Bacteria	p__Desulfobacterota	c__Desulfobulbia	o__Desulfobulbales	f__Desulfobulbaceae	g__Desulfobulbus	s__uncultured_Desulfobulbus_sp._g__Desulfobulbus	OTU623	0	0	0	0	0	1	0	0	0	0	1
d__Bacteria	k__norank_d__Bacteria	p__Bacteroidota	c__Bacteroidia	o__Bacteroidales	f__Prolixibacteraceae	g__norank_f__Prolixibacteraceae	s__uncultured_soil_bacterium_g__norank_f__Prolixibacteraceae	OTU587	0	0	0	0	1	0	0	0	0	0	1
d__Bacteria	k__norank_d__Bacteria	p__Firmicutes	c__Bacilli	o__Bacillales	f__Planococcaceae	g__Lysinibacillus	s__unclassified_g__Lysinibacillus	OTU1069	0	0	0	0	0	1	0	0	0	0	1
d__Bacteria	k__norank_d__Bacteria	p__Firmicutes	c__Bacilli	o__Bacillales	f__Planococcaceae	g__Planococcus	s__Planococcus_rifietoensis	OTU612	0	1	0	0	0	0	0	0	0	0	1
d__Bacteria	k__norank_d__Bacteria	p__Proteobacteria	c__Alphaproteobacteria	o__Sphingomonadales	f__Sphingomonadaceae	g__Altererythrobacter	s__unclassified_g__Altererythrobacter	OTU1098	0	0	0	0	1	0	0	0	0	0	1
d__Bacteria	k__norank_d__Bacteria	p__Proteobacteria	c__Alphaproteobacteria	o__Rhizobiales	f__Rhizobiales_Incertae_Sedis	g__Phreatobacter	s__uncultured_bacterium_g__Phreatobacter	OTU151	0	0	0	0	0	0	0	2	0	1	3
d__Bacteria	k__norank_d__Bacteria	p__Chloroflexi	c__Anaerolineae	o__Caldilineales	f__Caldilineaceae	g__norank_f__Caldilineaceae	s__metagenome_g__norank_f__Caldilineaceae	OTU606	0	0	0	1	0	0	0	0	0	0	1
d__Bacteria	k__norank_d__Bacteria	p__Actinobacteriota	c__Thermoleophilia	o__Gaiellales	f__Gaiellaceae	g__Gaiella	s__metagenome_g__Gaiella	OTU483	0	0	0	0	0	0	0	0	0	1	1
d__Bacteria	k__norank_d__Bacteria	p__SAR324_cladeMarine_group_B	c__norank_p__SAR324_cladeMarine_group_B	o__norank_c__norank_p__SAR324_cladeMarine_group_B	f__norank_o__norank_c__norank_p__SAR324_cladeMarine_group_B	g__norank_f__norank_o__norank_c__norank_p__SAR324_cladeMarine_group_B	s__bacterium_enrichment_culture_clone_B302011	OTU537	0	0	0	0	0	1	0	0	0	1	2
d__Bacteria	k__norank_d__Bacteria	p__Firmicutes	c__Bacilli	o__Entomoplasmatales	f__Entomoplasmatales_Incertae_Sedis	g__Candidatus_Hepatoplasma	s__unclassified_g__Candidatus_Hepatoplasma	OTU591	750	1384	3188	41	770	124	4	11	0	598	6870
d__Bacteria	k__norank_d__Bacteria	p__Chloroflexi	c__Anaerolineae	o__Anaerolineales	f__Anaerolineaceae	g__norank_f__Anaerolineaceae	s__unclassified_g__norank_f__Anaerolineaceae	OTU607	0	0	0	0	0	6	0	1	1	0	8
d__Bacteria	k__norank_d__Bacteria	p__Bacteroidota	c__Bacteroidia	o__Bacteroidales	f__Prolixibacteraceae	g__norank_f__Prolixibacteraceae	s__uncultured_prokaryote_g__norank_f__Prolixibacteraceae	OTU340	0	0	0	0	0	0	0	0	0	1	1
d__Bacteria	k__norank_d__Bacteria	p__Patescibacteria	c__Saccharimonadia	o__Saccharimonadales	f__unclassified_o__Saccharimonadales	g__unclassified_o__Saccharimonadales	s__unclassified_o__Saccharimonadales	OTU970	0	1	0	0	0	0	0	1	3	1	6
d__Bacteria	k__norank_d__Bacteria	p__Actinobacteriota	c__Acidimicrobiia	o__Microtrichales	f__Ilumatobacteraceae	g__CL500-29_marine_group	s__uncultured_bacterium_g__CL500-29_marine_group	OTU138	0	3	0	0	0	1	0	0	0	0	4
d__Bacteria	k__norank_d__Bacteria	p__Patescibacteria	c__Dojkabacteria	o__norank_c__Dojkabacteria	f__norank_o__norank_c__Dojkabacteria	g__norank_f__norank_o__norank_c__Dojkabacteria	s__uncultured_anaerobic_bacterium_g__norank_f__norank_o__norank_c__Dojkabacteria	OTU871	0	0	0	0	0	1	0	0	0	0	1
d__Bacteria	k__norank_d__Bacteria	p__Patescibacteria	c__Saccharimonadia	o__Saccharimonadales	f__unclassified_o__Saccharimonadales	g__unclassified_o__Saccharimonadales	s__unclassified_o__Saccharimonadales	OTU870	0	0	0	0	0	4	0	1	0	0	5
d__Bacteria	k__norank_d__Bacteria	p__Cyanobacteria	c__Cyanobacteriia	o__Chloroplast	f__norank_o__Chloroplast	g__norank_f__norank_o__Chloroplast	s__Raphidocelis_subcapitata	OTU538	0	0	0	0	0	2	0	0	0	0	2
d__Bacteria	k__norank_d__Bacteria	p__Firmicutes	c__Bacilli	o__Mycoplasmatales	f__Mycoplasmataceae	g__Candidatus_Bacilloplasma	s__uncultured_bacterium_g__Candidatus_Bacilloplasma	OTU852	0	1	0	0	3	0	0	1	0	1	6
d__Bacteria	k__norank_d__Bacteria	p__Cyanobacteria	c__Cyanobacteriia	o__Chloroplast	f__norank_o__Chloroplast	g__norank_f__norank_o__Chloroplast	s__Oscillatoriales_cyanobacterium_HF1	OTU1160	0	1	0	0	0	0	0	0	0	4	5
d__Bacteria	k__norank_d__Bacteria	p__Bdellovibrionota	c__Bdellovibrionia	o__Bdellovibrionales	f__Bdellovibrionaceae	g__Bdellovibrio	s__unclassified_g__Bdellovibrio	OTU189	0	2	0	0	0	0	0	1	0	0	3
d__Bacteria	k__norank_d__Bacteria	p__Verrucomicrobiota	c__Chlamydiae	o__Chlamydiales	f__cvE6	g__norank_f__cvE6	s__uncultured_bacterium_g__norank_f__cvE6	OTU152	0	0	0	0	0	0	0	0	0	1	1
d__Bacteria	k__norank_d__Bacteria	p__Proteobacteria	c__Alphaproteobacteria	o__Rhodobacterales	f__Rhodobacteraceae	g__unclassified_f__Rhodobacteraceae	s__unclassified_f__Rhodobacteraceae	OTU598	0	0	0	1	0	0	0	0	0	0	1
d__Bacteria	k__norank_d__Bacteria	p__Actinobacteriota	c__Actinobacteria	o__Streptomycetales	f__Streptomycetaceae	g__Streptomyces	s__Streptomyces_scabiei	OTU1021	0	0	0	0	0	0	0	4	0	20	24
d__Bacteria	k__norank_d__Bacteria	p__Bacteroidota	c__Bacteroidia	o__Chitinophagales	f__Chitinophagaceae	g__Puia	s__unclassified_g__Puia	OTU959	0	2	0	0	1	0	3	0	0	0	6
d__Bacteria	k__norank_d__Bacteria	p__Proteobacteria	c__Gammaproteobacteria	o__Legionellales	f__Legionellaceae	g__Legionella	s__uncultured_bacterium_g__Legionella	OTU329	0	0	0	0	0	4	0	1	0	1	6
d__Bacteria	k__norank_d__Bacteria	p__Actinobacteriota	c__Actinobacteria	o__Micrococcales	f__Microbacteriaceae	g__Leucobacter	s__uncultured_bacterium_g__Leucobacter	OTU502	0	1	0	0	0	0	1	0	0	4	6
d__Bacteria	k__norank_d__Bacteria	p__Bacteroidota	c__Bacteroidia	o__Flavobacteriales	f__Weeksellaceae	g__Chryseobacterium	s__uncultured_bacterium_g__Chryseobacterium	OTU459	0	3	0	0	1	0	0	12	0	2	18
d__Bacteria	k__norank_d__Bacteria	p__Proteobacteria	c__Alphaproteobacteria	o__Rickettsiales	f__norank_o__Rickettsiales	g__norank_f__norank_o__Rickettsiales	s__uncultured_bacterium_g__norank_f__norank_o__Rickettsiales	OTU838	30	3	45	0	21	0	0	1	0	0	100
d__Bacteria	k__norank_d__Bacteria	p__Actinobacteriota	c__Actinobacteria	o__Corynebacteriales	f__Mycobacteriaceae	g__Mycobacterium	s__Mycobacterium_celatum_g__Mycobacterium	OTU202	3	6	0	0	0	1	1	0	0	0	11
d__Bacteria	k__norank_d__Bacteria	p__Actinobacteriota	c__Actinobacteria	o__unclassified_c__Actinobacteria	f__unclassified_c__Actinobacteria	g__unclassified_c__Actinobacteria	s__unclassified_c__Actinobacteria	OTU442	0	0	0	0	0	0	0	2	0	1	3
d__Bacteria	k__norank_d__Bacteria	p__Bacteroidota	c__Bacteroidia	o__Bacteroidales	f__Bacteroidaceae	g__Bacteroides	s__Bacteroides_graminisolvens	OTU963	0	0	0	0	0	0	222	0	0	0	222
d__Bacteria	k__norank_d__Bacteria	p__Proteobacteria	c__Gammaproteobacteria	o__Burkholderiales	f__Rhodocyclaceae	g__unclassified_f__Rhodocyclaceae	s__unclassified_f__Rhodocyclaceae	OTU377	0	0	0	0	0	0	0	0	0	1	1
d__Bacteria	k__norank_d__Bacteria	p__Proteobacteria	c__Alphaproteobacteria	o__Rhizobiales	f__Beijerinckiaceae	g__alphaI_cluster	s__metagenome_g__alphaI_cluster	OTU456	0	0	0	0	0	0	0	0	0	1	1
d__Bacteria	k__norank_d__Bacteria	p__Acidobacteriota	c__Vicinamibacteria	o__Vicinamibacterales	f__Vicinamibacteraceae	g__norank_f__Vicinamibacteraceae	s__unclassified_g__norank_f__Vicinamibacteraceae	OTU773	0	1	0	0	0	0	0	0	0	0	1
d__Bacteria	k__norank_d__Bacteria	p__Cyanobacteria	c__Cyanobacteriia	o__Chloroplast	f__norank_o__Chloroplast	g__norank_f__norank_o__Chloroplast	s__unclassified_g__norank_f__norank_o__Chloroplast	OTU609	0	0	0	1	0	0	0	0	0	0	1
d__Bacteria	k__norank_d__Bacteria	p__Actinobacteriota	c__Thermoleophilia	o__Solirubrobacterales	f__Solirubrobacteraceae	g__Conexibacter	s__unclassified_g__Conexibacter	OTU946	0	0	0	0	0	0	2	0	0	0	2
d__Bacteria	k__norank_d__Bacteria	p__Cyanobacteria	c__Cyanobacteriia	o__Cyanobacteriales	f__Phormidiaceae	g__Planktothrix_NIVA-CYA_15	s__uncultured_bacterium_g__Planktothrix_NIVA-CYA_15	OTU47	3	8	0	3	0	1	29	14	0	0	58
d__Bacteria	k__norank_d__Bacteria	p__Actinobacteriota	c__Thermoleophilia	o__Gaiellales	f__norank_o__Gaiellales	g__norank_f__norank_o__Gaiellales	s__uncultured_bacterium_g__norank_f__norank_o__Gaiellales	OTU186	0	2	0	0	0	1	0	1	1	3	8
d__Bacteria	k__norank_d__Bacteria	p__Proteobacteria	c__Gammaproteobacteria	o__Pseudomonadales	f__Pseudomonadaceae	g__Pseudomonas	s__unclassified_g__Pseudomonas	OTU476	0	0	1	0	0	0	0	0	0	0	1
d__Bacteria	k__norank_d__Bacteria	p__Bacteroidota	c__Bacteroidia	o__Bacteroidales	f__Dysgonomonadaceae	g__Dysgonomonas	s__unclassified_g__Dysgonomonas	OTU44	1393	1023	1378	41	66	136	58	592	6	9	4702
d__Bacteria	k__norank_d__Bacteria	p__Sva0485	c__norank_p__Sva0485	o__norank_c__norank_p__Sva0485	f__norank_o__norank_c__norank_p__Sva0485	g__norank_f__norank_o__norank_c__norank_p__Sva0485	s__uncultured_bacterium_g__norank_f__norank_o__norank_c__norank_p__Sva0485	OTU146	0	1	0	0	0	0	0	0	0	0	1
d__Bacteria	k__norank_d__Bacteria	p__unclassified_k__norank_d__Bacteria	c__unclassified_k__norank_d__Bacteria	o__unclassified_k__norank_d__Bacteria	f__unclassified_k__norank_d__Bacteria	g__unclassified_k__norank_d__Bacteria	s__unclassified_k__norank_d__Bacteria	OTU528	0	0	0	0	0	0	0	2	0	1	3
d__Bacteria	k__norank_d__Bacteria	p__Actinobacteriota	c__Actinobacteria	o__PeM15	f__norank_o__PeM15	g__norank_f__norank_o__PeM15	s__metagenome_g__norank_f__norank_o__PeM15	OTU569	0	0	0	0	0	0	1	0	0	0	1
d__Bacteria	k__norank_d__Bacteria	p__unclassified_k__norank_d__Bacteria	c__unclassified_k__norank_d__Bacteria	o__unclassified_k__norank_d__Bacteria	f__unclassified_k__norank_d__Bacteria	g__unclassified_k__norank_d__Bacteria	s__unclassified_k__norank_d__Bacteria	OTU527	1	0	0	0	158	0	0	0	0	0	159
d__Bacteria	k__norank_d__Bacteria	p__Proteobacteria	c__Alphaproteobacteria	o__Rhizobiales	f__unclassified_o__Rhizobiales	g__unclassified_o__Rhizobiales	s__unclassified_o__Rhizobiales	OTU1000	0	0	0	0	0	2	0	0	0	0	2
d__Bacteria	k__norank_d__Bacteria	p__unclassified_k__norank_d__Bacteria	c__unclassified_k__norank_d__Bacteria	o__unclassified_k__norank_d__Bacteria	f__unclassified_k__norank_d__Bacteria	g__unclassified_k__norank_d__Bacteria	s__unclassified_k__norank_d__Bacteria	OTU288	0	0	0	0	0	2	0	0	0	0	2
d__Bacteria	k__norank_d__Bacteria	p__Proteobacteria	c__Gammaproteobacteria	o__Burkholderiales	f__Sutterellaceae	g__norank_f__Sutterellaceae	s__unclassified_g__norank_f__Sutterellaceae	OTU916	0	4	0	0	0	3	1	0	0	0	8
d__Bacteria	k__norank_d__Bacteria	p__Bacteroidota	c__Bacteroidia	o__Flavobacteriales	f__Weeksellaceae	g__unclassified_f__Weeksellaceae	s__unclassified_f__Weeksellaceae	OTU421	0	1	0	5	0	0	5	0	0	1	12
d__Bacteria	k__norank_d__Bacteria	p__Chloroflexi	c__Anaerolineae	o__unclassified_c__Anaerolineae	f__unclassified_c__Anaerolineae	g__unclassified_c__Anaerolineae	s__unclassified_c__Anaerolineae	OTU1147	0	0	0	0	0	0	0	0	0	4	4
d__Bacteria	k__norank_d__Bacteria	p__Desulfobacterota	c__Desulfobulbia	o__Desulfobulbales	f__Desulfocapsaceae	g__unclassified_f__Desulfocapsaceae	s__unclassified_f__Desulfocapsaceae	OTU791	0	0	0	0	0	4	1	3	0	37	45
d__Bacteria	k__norank_d__Bacteria	p__Actinobacteriota	c__Acidimicrobiia	o__IMCC26256	f__norank_o__IMCC26256	g__norank_f__norank_o__IMCC26256	s__uncultured_Ferrimicrobium_sp._g__norank	OTU222	0	3	0	0	0	0	0	0	2	0	5
d__Bacteria	k__norank_d__Bacteria	p__Cyanobacteria	c__Cyanobacteriia	o__Chloroplast	f__norank_o__Chloroplast	g__norank_f__norank_o__Chloroplast	s__unclassified_g__norank_f__norank_o__Chloroplast	OTU506	0	0	1	0	0	0	0	0	0	3	4
d__Bacteria	k__norank_d__Bacteria	p__Firmicutes	c__Clostridia	o__Clostridiales	f__Clostridiaceae	g__Clostridium_sensu_stricto_12	s__Clostridium_carboxidivorans_P7	OTU888	0	0	0	0	0	3	0	1	0	1	5
d__Bacteria	k__norank_d__Bacteria	p__Actinobacteriota	c__Actinobacteria	o__Micromonosporales	f__Micromonosporaceae	g__unclassified_f__Micromonosporaceae	s__unclassified_f__Micromonosporaceae	OTU1169	0	3	0	1	0	0	0	8	2	11	25
d__Bacteria	k__norank_d__Bacteria	p__Firmicutes	c__Bacilli	o__Mycoplasmatales	f__Mycoplasmataceae	g__norank_f__Mycoplasmataceae	s__uncultured_Firmicutes_bacterium_g__norank_f__Mycoplasmataceae	OTU1163	186	302	104	805	292	296	23	3827	710	1129	7674
d__Bacteria	k__norank_d__Bacteria	p__Firmicutes	c__Clostridia	o__Peptostreptococcales-Tissierellales	f__Peptostreptococcaceae	g__Romboutsia	s__uncultured_bacterium_g__Romboutsia	OTU882	0	2	0	1	0	15	1	7	0	13	39
d__Bacteria	k__norank_d__Bacteria	p__Firmicutes	c__Desulfitobacteriia	o__Desulfitobacteriales	f__norank_o__Desulfitobacteriales	g__TC1	s__unclassified_g__TC1	OTU840	3	0	0	0	1	0	0	0	0	35	39
d__Bacteria	k__norank_d__Bacteria	p__Proteobacteria	c__Alphaproteobacteria	o__Reyranellales	f__Reyranellaceae	g__Reyranella	s__uncultured_bacterium_g__Reyranella	OTU996	0	1	0	0	0	0	1	0	0	0	2
d__Bacteria	k__norank_d__Bacteria	p__Patescibacteria	c__Saccharimonadia	o__Saccharimonadales	f__LWQ8	g__norank_f__LWQ8	s__uncultured_bacterium_g__norank_f__LWQ8	OTU540	0	3	0	12	0	0	8	0	3	0	26
d__Bacteria	k__norank_d__Bacteria	p__Patescibacteria	c__WWE3	o__norank_c__WWE3	f__norank_o__norank_c__WWE3	g__norank_f__norank_o__norank_c__WWE3	s__unclassified_g__norank_f__norank_o__norank_c__WWE3	OTU441	0	0	0	0	0	1	0	0	0	0	1
d__Bacteria	k__norank_d__Bacteria	p__Patescibacteria	c__CPR2	o__norank_c__CPR2	f__norank_o__norank_c__CPR2	g__norank_f__norank_o__norank_c__CPR2	s__unclassified_g__norank_f__norank_o__norank_c__CPR2	OTU777	0	0	0	0	0	0	0	1	0	0	1
d__Bacteria	k__norank_d__Bacteria	p__Bdellovibrionota	c__Bdellovibrionia	o__Bdellovibrionales	f__Bdellovibrionaceae	g__OM27_clade	s__uncultured_bacterium_g__OM27_clade	OTU264	0	0	0	0	0	0	0	1	0	0	1
d__Bacteria	k__norank_d__Bacteria	p__Firmicutes	c__Bacilli	o__Bacillales	f__Planococcaceae	g__Chryseomicrobium	s__uncultured_bacterium_g__Chryseomicrobium	OTU899	0	0	0	0	1	0	0	0	0	0	1
d__Bacteria	k__norank_d__Bacteria	p__Chloroflexi	c__Anaerolineae	o__unclassified_c__Anaerolineae	f__unclassified_c__Anaerolineae	g__unclassified_c__Anaerolineae	s__unclassified_c__Anaerolineae	OTU765	0	1	0	0	0	0	0	1	0	0	2
d__Bacteria	k__norank_d__Bacteria	p__Desulfobacterota	c__Desulfovibrionia	o__Desulfovibrionales	f__Desulfomicrobiaceae	g__Desulfomicrobium	s__uncultured_bacterium_g__Desulfomicrobium	OTU637	0	0	0	0	0	0	2	0	0	0	2
d__Bacteria	k__norank_d__Bacteria	p__Patescibacteria	c__Saccharimonadia	o__Saccharimonadales	f__norank_o__Saccharimonadales	g__norank_f__norank_o__Saccharimonadales	s__uncultured_bacterium_g__norank_f__norank_o__Saccharimonadales	OTU829	0	3	0	0	0	2	1	0	2	3	11
d__Bacteria	k__norank_d__Bacteria	p__Proteobacteria	c__Gammaproteobacteria	o__Vibrionales	f__Vibrionaceae	g__Photobacterium	s__Photobacterium_damselae_subsp._damselae_CIP_102761	OTU733	0	1	0	0	0	0	0	0	0	0	1
d__Bacteria	k__norank_d__Bacteria	p__Firmicutes	c__Clostridia	o__Lachnospirales	f__Lachnospiraceae	g__unclassified_f__Lachnospiraceae	s__unclassified_f__Lachnospiraceae	OTU178	0	20	0	0	0	0	0	0	0	0	20
d__Bacteria	k__norank_d__Bacteria	p__Proteobacteria	c__Gammaproteobacteria	o__SZB30	f__norank_o__SZB30	g__norank_f__norank_o__SZB30	s__uncultured_bacterium_g__norank_f__norank_o__SZB30	OTU934	0	0	0	0	0	2	0	4	0	0	6
d__Bacteria	k__norank_d__Bacteria	p__Firmicutes	c__Bacilli	o__Mycoplasmatales	f__Mycoplasmataceae	g__norank_f__Mycoplasmataceae	s__uncultured_Firmicutes_bacterium_g__norank_f__Mycoplasmataceae	OTU969	16	0	0	100	12	0	0	1	199	0	328
d__Bacteria	k__norank_d__Bacteria	p__Acidobacteriota	c__Vicinamibacteria	o__Vicinamibacterales	f__norank_o__Vicinamibacterales	g__norank_f__norank_o__Vicinamibacterales	s__uncultured_prokaryote_g__norank_f__norank_o__Vicinamibacterales	OTU93	0	1	0	0	0	2	0	1	0	0	4
d__Bacteria	k__norank_d__Bacteria	p__Proteobacteria	c__Gammaproteobacteria	o__Legionellales	f__Legionellaceae	g__Legionella	s__unclassified_g__Legionella	OTU851	0	2	0	0	0	0	0	1	0	0	3
d__Bacteria	k__norank_d__Bacteria	p__Proteobacteria	c__Alphaproteobacteria	o__Rhizobiales	f__Rhizobiaceae	g__norank_f__Rhizobiaceae	s__metagenome_g__norank_f__Rhizobiaceae	OTU1111	0	0	0	0	0	0	0	0	1	0	1
d__Bacteria	k__norank_d__Bacteria	p__Patescibacteria	c__Saccharimonadia	o__Saccharimonadales	f__unclassified_o__Saccharimonadales	g__unclassified_o__Saccharimonadales	s__unclassified_o__Saccharimonadales	OTU89	0	0	0	0	0	2	0	0	0	0	2
d__Bacteria	k__norank_d__Bacteria	p__Patescibacteria	c__Saccharimonadia	o__Saccharimonadales	f__unclassified_o__Saccharimonadales	g__unclassified_o__Saccharimonadales	s__unclassified_o__Saccharimonadales	OTU548	0	0	0	0	0	0	0	0	2	0	2
d__Bacteria	k__norank_d__Bacteria	p__Proteobacteria	c__Gammaproteobacteria	o__Xanthomonadales	f__Xanthomonadaceae	g__Thermomonas	s__uncultured_bacterium_g__Thermomonas	OTU807	0	0	0	1	0	0	0	0	0	1	2
d__Bacteria	k__norank_d__Bacteria	p__Firmicutes	c__Clostridia	o__Peptostreptococcales-Tissierellales	f__Peptostreptococcaceae	g__Proteocatella	s__uncultured_bacterium_g__Proteocatella	OTU113	0	0	0	0	1	0	0	0	0	1	2
d__Bacteria	k__norank_d__Bacteria	p__Proteobacteria	c__Alphaproteobacteria	o__Rhizobiales	f__Beijerinckiaceae	g__Methylobacterium-Methylorubrum	s__Methylobacterium_brachiatum	OTU1038	0	0	0	0	0	0	0	4	0	4	8
d__Bacteria	k__norank_d__Bacteria	p__Proteobacteria	c__Gammaproteobacteria	o__Coxiellales	f__Coxiellaceae	g__Coxiella	s__bacterium_enrichment_culture_clone_B2042011	OTU625	0	0	0	0	0	1	0	0	0	0	1
d__Bacteria	k__norank_d__Bacteria	p__Myxococcota	c__Polyangia	o__Polyangiales	f__Sandaracinaceae	g__Sandaracinus	s__unclassified_g__Sandaracinus	OTU205	0	2	0	0	0	0	0	0	0	0	2
d__Bacteria	k__norank_d__Bacteria	p__Firmicutes	c__Bacilli	o__Paenibacillales	f__Paenibacillaceae	g__Paenibacillus	s__unclassified_g__Paenibacillus	OTU1148	0	0	0	0	0	0	0	0	0	5	5
d__Bacteria	k__norank_d__Bacteria	p__Actinobacteriota	c__Actinobacteria	o__PeM15	f__norank_o__PeM15	g__norank_f__norank_o__PeM15	s__uncultured_soil_bacterium_g__norank_f__norank_o__PeM15	OTU453	0	2	0	1	0	8	0	1	1	1	14
d__Bacteria	k__norank_d__Bacteria	p__Actinobacteriota	c__Coriobacteriia	o__OPB41	f__norank_o__OPB41	g__norank_f__norank_o__OPB41	s__uncultured_Coriobacteriia_bacterium	OTU864	0	0	0	0	0	1	0	0	0	0	1
d__Bacteria	k__norank_d__Bacteria	p__Bacteroidota	c__Bacteroidia	o__Flavobacteriales	f__Flavobacteriaceae	g__Flavobacterium	s__Flavobacterium_sasangense	OTU582	0	0	0	0	2	0	0	0	0	0	2
d__Bacteria	k__norank_d__Bacteria	p__Chloroflexi	c__Anaerolineae	o__SBR1031	f__norank_o__SBR1031	g__norank_f__norank_o__SBR1031	s__unclassified_g__norank_f__norank_o__SBR1031	OTU953	0	0	0	0	0	0	1	0	0	0	1
d__Bacteria	k__norank_d__Bacteria	p__Actinobacteriota	c__Actinobacteria	o__Propionibacteriales	f__Nocardioidaceae	g__Marmoricola	s__uncultured_bacterium_g__Marmoricola	OTU750	0	0	0	1	0	0	0	0	0	3	4
d__Bacteria	k__norank_d__Bacteria	p__Actinobacteriota	c__Thermoleophilia	o__Gaiellales	f__norank_o__Gaiellales	g__norank_f__norank_o__Gaiellales	s__bacterium_Ellin6517	OTU182	0	6	0	0	0	0	0	0	0	0	6
d__Bacteria	k__norank_d__Bacteria	p__Bacteroidota	c__Bacteroidia	o__Bacteroidales	f__Bacteroidaceae	g__Bacteroides	s__unclassified_g__Bacteroides	OTU1051	238	196	312	0	11	1786	3040	55	0	81	5719
d__Bacteria	k__norank_d__Bacteria	p__Proteobacteria	c__Gammaproteobacteria	o__Diplorickettsiales	f__Diplorickettsiaceae	g__Aquicella	s__unclassified_g__Aquicella	OTU707	0	0	0	0	0	1	0	0	0	0	1
d__Bacteria	k__norank_d__Bacteria	p__Firmicutes	c__Bacilli	o__Mycoplasmatales	f__Mycoplasmataceae	g__Candidatus_Bacilloplasma	s__uncultured_bacterium_g__Candidatus_Bacilloplasma	OTU1050	2324	8164	655	11873	2185	15282	3756	14595	30717	7258	96809
d__Bacteria	k__norank_d__Bacteria	p__Cyanobacteria	c__Cyanobacteriia	o__Cyanobacteriales	f__Nostocaceae	g__Nodularia_PCC-9350	s__Anabaenopsis_sp._PCC_9215	OTU295	0	0	0	0	0	0	0	0	0	2	2
d__Bacteria	k__norank_d__Bacteria	p__Chloroflexi	c__Anaerolineae	o__SJA-15	f__norank_o__SJA-15	g__norank_f__norank_o__SJA-15	s__uncultured_bacterium_g__norank_f__norank_o__SJA-15	OTU783	0	0	0	0	0	2	0	1	0	2	5
d__Bacteria	k__norank_d__Bacteria	p__Firmicutes	c__Bacilli	o__Bacillales	f__Planococcaceae	g__Kurthia	s__Kurthia_sp._11kri321	OTU470	0	2	0	0	1	0	0	0	0	0	3
d__Bacteria	k__norank_d__Bacteria	p__Bacteroidota	c__Bacteroidia	o__Chitinophagales	f__Chitinophagaceae	g__unclassified_f__Chitinophagaceae	s__unclassified_f__Chitinophagaceae	OTU816	0	0	0	0	0	0	0	8	0	0	8
d__Bacteria	k__norank_d__Bacteria	p__Acidobacteriota	c__Acidobacteriae	o__Acidobacteriales	f__Acidobacteriaceae_Subgroup_1	g__Granulicella	s__unclassified_g__Granulicella	OTU181	1	3	0	0	1	0	0	0	0	0	5
d__Bacteria	k__norank_d__Bacteria	p__Firmicutes	c__Bacilli	o__Mycoplasmatales	f__Mycoplasmataceae	g__Candidatus_Bacilloplasma	s__uncultured_bacterium_g__Candidatus_Bacilloplasma	OTU554	1831	378	5100	523	1220	1902	10367	1109	1777	539	24746
d__Bacteria	k__norank_d__Bacteria	p__Actinobacteriota	c__Actinobacteria	o__Micrococcales	f__Micrococcaceae	g__Glutamicibacter	s__unclassified_g__Glutamicibacter	OTU479	0	0	0	0	1	0	0	0	0	0	1
d__Bacteria	k__norank_d__Bacteria	p__Proteobacteria	c__Alphaproteobacteria	o__Rhodobacterales	f__Rhodobacteraceae	g__unclassified_f__Rhodobacteraceae	s__unclassified_f__Rhodobacteraceae	OTU950	0	0	0	0	0	0	2	0	0	0	2
d__Bacteria	k__norank_d__Bacteria	p__Patescibacteria	c__Microgenomatia	o__Candidatus_Pacebacteria	f__norank_o__Candidatus_Pacebacteria	g__norank_f__norank_o__Candidatus_Pacebacteria	s__uncultured_anaerobic_bacterium_g__norank_f__norank_o__Candidatus_Pacebacteria	OTU854	0	0	0	0	0	1	0	0	0	0	1
d__Bacteria	k__norank_d__Bacteria	p__Acidobacteriota	c__Thermoanaerobaculia	o__Thermoanaerobaculales	f__Thermoanaerobaculaceae	g__Subgroup_23	s__uncultured_prokaryote_g__Subgroup_23	OTU265	0	0	0	1	0	1	0	0	0	0	2
d__Bacteria	k__norank_d__Bacteria	p__Cyanobacteria	c__Cyanobacteriia	o__Chloroplast	f__norank_o__Chloroplast	g__norank_f__norank_o__Chloroplast	s__unclassified_g__norank_f__norank_o__Chloroplast	OTU398	0	0	0	0	0	1	0	0	0	0	1
d__Bacteria	k__norank_d__Bacteria	p__Firmicutes	c__Clostridia	o__Clostridiales	f__Clostridiaceae	g__Clostridium_sensu_stricto_1	s__Clostridium_beijerinckii	OTU897	0	2	0	0	0	3	0	1	1	12	19
d__Bacteria	k__norank_d__Bacteria	p__Firmicutes	c__Bacilli	o__Erysipelotrichales	f__Erysipelotrichaceae	g__Turicibacter	s__uncultured_bacterium_g__Turicibacter	OTU82	0	1	0	0	0	0	0	2	0	0	3
d__Bacteria	k__norank_d__Bacteria	p__Firmicutes	c__Bacilli	o__Mycoplasmatales	f__Mycoplasmataceae	g__Candidatus_Bacilloplasma	s__uncultured_Firmicutes_bacterium_g__Candidatus_Bacilloplasma	OTU893	0	14	1	0	0	1	0	4	0	0	20
d__Bacteria	k__norank_d__Bacteria	p__Actinobacteriota	c__Actinobacteria	o__Propionibacteriales	f__Nocardioidaceae	g__Nocardioides	s__unclassified_g__Nocardioides	OTU855	0	2	0	0	0	3	0	2	0	0	7
d__Bacteria	k__norank_d__Bacteria	p__Patescibacteria	c__Gracilibacteria	o__norank_c__Gracilibacteria	f__norank_o__norank_c__Gracilibacteria	g__norank_f__norank_o__norank_c__Gracilibacteria	s__metagenome_g__norank_f__norank_o__norank_c__Gracilibacteria	OTU1119	0	0	0	0	0	0	0	0	0	2	2
d__Bacteria	k__norank_d__Bacteria	p__Proteobacteria	c__Gammaproteobacteria	o__Enterobacterales	f__Budviciaceae	g__Pragia	s__bacterium_TSA241-4	OTU1073	522	1097	197	314	150	1	265	288	114	333	3281
d__Bacteria	k__norank_d__Bacteria	p__Proteobacteria	c__Alphaproteobacteria	o__Rhizobiales	f__Rhizobiaceae	g__Aminobacter	s__unclassified_g__Aminobacter	OTU654	0	1	0	0	0	0	0	0	0	2	3
d__Bacteria	k__norank_d__Bacteria	p__Desulfobacterota	c__Syntrophorhabdia	o__Syntrophorhabdales	f__Syntrophorhabdaceae	g__Syntrophorhabdus	s__uncultured_Syntrophorhabdaceae_bacterium_SHA-207	OTU284	0	0	0	0	0	0	0	1	0	0	1
d__Bacteria	k__norank_d__Bacteria	p__Desulfobacterota	c__Desulfobulbia	o__Desulfobulbales	f__Desulfocapsaceae	g__Desulforhopalus	s__unclassified_g__Desulforhopalus	OTU148	0	0	0	0	0	0	0	1	0	0	1
d__Bacteria	k__norank_d__Bacteria	p__Firmicutes	c__Clostridia	o__Oscillospirales	f__Oscillospiraceae	g__unclassified_f__Oscillospiraceae	s__unclassified_f__Oscillospiraceae	OTU952	0	0	0	0	0	0	5	0	0	0	5
d__Bacteria	k__norank_d__Bacteria	p__Bacteroidota	c__Kapabacteria	o__Kapabacteriales	f__norank_o__Kapabacteriales	g__norank_f__norank_o__Kapabacteriales	s__unclassified_g__norank_f__norank_o__Kapabacteriales	OTU577	0	1	0	0	7	0	0	0	0	0	8
d__Bacteria	k__norank_d__Bacteria	p__Chloroflexi	c__KD4-96	o__norank_c__KD4-96	f__norank_o__norank_c__KD4-96	g__norank_f__norank_o__norank_c__KD4-96	s__uncultured_bacterium_g__norank_f__norank_o__norank_c__KD4-96	OTU549	0	2	0	1	0	2	0	0	0	0	5
d__Bacteria	k__norank_d__Bacteria	p__Patescibacteria	c__Saccharimonadia	o__Saccharimonadales	f__LWQ8	g__norank_f__LWQ8	s__uncultured_bacterium_g__norank_f__LWQ8	OTU1155	0	0	0	0	0	0	0	0	0	1	1
d__Bacteria	k__norank_d__Bacteria	p__Proteobacteria	c__Alphaproteobacteria	o__Rhizobiales	f__Rhizobiaceae	g__Allorhizobium-Neorhizobium-Pararhizobium-Rhizobium	s__unclassified_g__Allorhizobium-Neorhizobium-Pararhizobium-Rhizobium	OTU695	0	0	0	0	0	3	0	0	0	4	7
d__Bacteria	k__norank_d__Bacteria	p__Actinobacteriota	c__Thermoleophilia	o__Gaiellales	f__norank_o__Gaiellales	g__norank_f__norank_o__Gaiellales	s__unclassified_g__norank_f__norank_o__Gaiellales	OTU249	0	0	0	0	0	5	0	1	1	0	7
d__Bacteria	k__norank_d__Bacteria	p__Actinobacteriota	c__Acidimicrobiia	o__Microtrichales	f__Ilumatobacteraceae	g__norank_f__Ilumatobacteraceae	s__uncultured_bacterium_g__norank_f__Ilumatobacteraceae	OTU339	0	0	0	0	0	4	0	0	0	0	4
d__Bacteria	k__norank_d__Bacteria	p__Proteobacteria	c__Gammaproteobacteria	o__Chromatiales	f__Chromatiaceae	g__unclassified_f__Chromatiaceae	s__unclassified_f__Chromatiaceae	OTU987	0	0	0	0	0	1	0	1	0	0	2
d__Bacteria	k__norank_d__Bacteria	p__Firmicutes	c__Bacilli	o__Bacillales	f__Bacillaceae	g__Bacillus	s__Bacillus_aquimaris	OTU734	0	0	0	1	0	1	0	1	0	1	4
d__Bacteria	k__norank_d__Bacteria	p__Cyanobacteria	c__Cyanobacteriia	o__Synechococcales	f__Cyanobiaceae	g__Synechococcus_CC9902	s__unclassified_g__Synechococcus_CC9902	OTU509	0	1	0	0	0	0	0	0	0	0	1
d__Bacteria	k__norank_d__Bacteria	p__Proteobacteria	c__Alphaproteobacteria	o__Rhodobacterales	f__Rhodobacteraceae	g__Rhodobacter	s__uncultured_bacterium_g__Rhodobacter	OTU665	0	5	1	1	0	27	1	24	1	10	70
d__Bacteria	k__norank_d__Bacteria	p__Proteobacteria	c__Gammaproteobacteria	o__Burkholderiales	f__Rhodocyclaceae	g__norank_f__Rhodocyclaceae	s__uncultured_Rhodocyclaceae_bacterium_g__norank_f__Rhodocyclaceae	OTU1081	0	2	2	0	0	0	0	0	0	0	4
d__Bacteria	k__norank_d__Bacteria	p__Actinobacteriota	c__Thermoleophilia	o__Gaiellales	f__norank_o__Gaiellales	g__norank_f__norank_o__Gaiellales	s__metagenome_g__norank_f__norank_o__Gaiellales	OTU1167	0	1	0	0	0	2	0	1	0	1	5
d__Bacteria	k__norank_d__Bacteria	p__Firmicutes	c__Bacilli	o__Erysipelotrichales	f__Erysipelotrichaceae	g__ZOR0006	s__Cetobacterium_sp._ZOR0034	OTU857	0	0	0	0	0	1	0	0	0	2	3
d__Bacteria	k__norank_d__Bacteria	p__Verrucomicrobiota	c__Verrucomicrobiae	o__Verrucomicrobiales	f__Rubritaleaceae	g__Luteolibacter	s__uncultured_bacterium_g__Luteolibacter	OTU859	0	0	0	0	0	1	0	0	0	0	1
d__Bacteria	k__norank_d__Bacteria	p__Bacteroidota	c__Bacteroidia	o__Flavobacteriales	f__Crocinitomicaceae	g__Fluviicola	s__uncultured_bacterium_g__Fluviicola	OTU1074	0	2	0	0	0	0	0	0	0	0	2
d__Bacteria	k__norank_d__Bacteria	p__Patescibacteria	c__Dojkabacteria	o__norank_c__Dojkabacteria	f__norank_o__norank_c__Dojkabacteria	g__norank_f__norank_o__norank_c__Dojkabacteria	s__uncultured_prokaryote_g__norank_f__norank_o__norank_c__Dojkabacteria	OTU1023	0	0	0	0	0	0	0	1	0	0	1
d__Bacteria	k__norank_d__Bacteria	p__Proteobacteria	c__Alphaproteobacteria	o__Rhizobiales	f__Hyphomicrobiaceae	g__norank_f__Hyphomicrobiaceae	s__metagenome_g__norank_f__Hyphomicrobiaceae	OTU1004	0	3	0	0	0	0	0	0	0	1	4
d__Bacteria	k__norank_d__Bacteria	p__Cyanobacteria	c__Cyanobacteriia	o__Chloroplast	f__norank_o__Chloroplast	g__norank_f__norank_o__Chloroplast	s__unclassified_g__norank_f__norank_o__Chloroplast	OTU62	0	0	0	0	0	2	0	2	0	0	4
d__Bacteria	k__norank_d__Bacteria	p__Desulfobacterota	c__Desulfobulbia	o__Desulfobulbales	f__Desulfocapsaceae	g__norank_f__Desulfocapsaceae	s__unclassified_g__norank_f__Desulfocapsaceae	OTU150	0	0	0	0	0	3	0	2	0	2	7
d__Bacteria	k__norank_d__Bacteria	p__Firmicutes	c__Bacilli	o__Mycoplasmatales	f__Mycoplasmataceae	g__norank_f__Mycoplasmataceae	s__uncultured_Firmicutes_bacterium_g__norank_f__Mycoplasmataceae	OTU67	68	8	8	357	183	14	12	12	688	65	1415
d__Bacteria	k__norank_d__Bacteria	p__Cyanobacteria	c__Cyanobacteriia	o__Chloroplast	f__norank_o__Chloroplast	g__norank_f__norank_o__Chloroplast	s__Nannochloropsis_gaditana_g__norank	OTU1109	0	2	0	0	0	8	0	4	6	4	24
d__Bacteria	k__norank_d__Bacteria	p__Actinobacteriota	c__Thermoleophilia	o__Solirubrobacterales	f__67-14	g__norank_f__67-14	s__unclassified_g__norank_f__67-14	OTU928	0	0	0	0	0	2	0	0	1	1	4
d__Bacteria	k__norank_d__Bacteria	p__Firmicutes	c__Bacilli	o__Erysipelotrichales	f__Erysipelatoclostridiaceae	g__Coprobacillus	s__uncultured_bacterium_g__Coprobacillus	OTU886	254	391	61	286	32	2049	181	879	765	122	5020
d__Bacteria	k__norank_d__Bacteria	p__Proteobacteria	c__Alphaproteobacteria	o__Sphingomonadales	f__Sphingomonadaceae	g__unclassified_f__Sphingomonadaceae	s__unclassified_f__Sphingomonadaceae	OTU600	0	2	1	1	0	0	1	2	5	3	15
d__Bacteria	k__norank_d__Bacteria	p__Firmicutes	c__Bacilli	o__Erysipelotrichales	f__Erysipelotrichaceae	g__Erysipelothrix	s__uncultured_low_GC_Gram-positive_bacterium_g__Erysipelothrix	OTU632	0	0	0	0	1	0	0	0	0	0	1
d__Bacteria	k__norank_d__Bacteria	p__Patescibacteria	c__Saccharimonadia	o__Saccharimonadales	f__norank_o__Saccharimonadales	g__norank_f__norank_o__Saccharimonadales	s__uncultured_bacterium_g__norank_f__norank_o__Saccharimonadales	OTU879	0	3	1	0	0	1	0	0	0	0	5
d__Bacteria	k__norank_d__Bacteria	p__Patescibacteria	c__Saccharimonadia	o__Saccharimonadales	f__norank_o__Saccharimonadales	g__norank_f__norank_o__Saccharimonadales	s__uncultured_bacterium_g__norank_f__norank_o__Saccharimonadales	OTU1045	0	0	0	0	0	0	0	0	6	0	6
d__Bacteria	k__norank_d__Bacteria	p__Firmicutes	c__Clostridia	o__norank_c__Clostridia	f__Hungateiclostridiaceae	g__unclassified_f__Hungateiclostridiaceae	s__unclassified_f__Hungateiclostridiaceae	OTU1165	0	0	0	0	0	0	0	0	0	1	1
d__Bacteria	k__norank_d__Bacteria	p__Patescibacteria	c__Parcubacteria	o__Candidatus_Kaiserbacteria	f__norank_o__Candidatus_Kaiserbacteria	g__norank_f__norank_o__Candidatus_Kaiserbacteria	s__uncultured_organism_g__norank_f__norank_o__Candidatus_Kaiserbacteria	OTU173	0	2	0	0	0	0	0	0	0	0	2
d__Bacteria	k__norank_d__Bacteria	p__Chloroflexi	c__Chloroflexia	o__Chloroflexales	f__Herpetosiphonaceae	g__Herpetosiphon	s__unclassified_g__Herpetosiphon	OTU808	1	0	0	0	0	0	0	0	0	0	1
d__Bacteria	k__norank_d__Bacteria	p__Proteobacteria	c__Gammaproteobacteria	o__Alteromonadales	f__Shewanellaceae	g__Shewanella	s__Shewanella_bicestrii	OTU849	35	17	2	4	81	1	11	30	6	4	191
d__Bacteria	k__norank_d__Bacteria	p__Proteobacteria	c__Gammaproteobacteria	o__Burkholderiales	f__Chitinibacteraceae	g__Chitinilyticum	s__Chitinilyticum_aquatile	OTU172	0	379	0	0	0	0	0	0	0	0	379
d__Bacteria	k__norank_d__Bacteria	p__Chloroflexi	c__Anaerolineae	o__Caldilineales	f__Caldilineaceae	g__norank_f__Caldilineaceae	s__uncultured_Chloroflexi_bacterium_g__norank_f__Caldilineaceae	OTU75	0	0	0	0	0	1	0	0	0	0	1
d__Bacteria	k__norank_d__Bacteria	p__Cyanobacteria	c__Cyanobacteriia	o__Chloroplast	f__norank_o__Chloroplast	g__norank_f__norank_o__Chloroplast	s__Oscillatoriales_cyanobacterium_HF1	OTU63	0	1	0	0	0	0	0	0	0	2	3
d__Bacteria	k__norank_d__Bacteria	p__Actinobacteriota	c__Actinobacteria	o__Propionibacteriales	f__Nocardioidaceae	g__Nocardioides	s__Nocardioides_sp._g__Nocardioides	OTU920	0	1	0	0	0	0	0	0	0	0	1
d__Bacteria	k__norank_d__Bacteria	p__Actinobacteriota	c__Coriobacteriia	o__OPB41	f__norank_o__OPB41	g__norank_f__norank_o__OPB41	s__uncultured_bacterium_g__norank_f__norank_o__OPB41	OTU98	0	0	0	0	0	1	0	0	1	1	3
d__Bacteria	k__norank_d__Bacteria	p__Cyanobacteria	c__Cyanobacteriia	o__Chloroplast	f__norank_o__Chloroplast	g__norank_f__norank_o__Chloroplast	s__uncultured_Phacus	OTU43	1	0	0	1	0	0	0	0	0	0	2
d__Bacteria	k__norank_d__Bacteria	p__Actinobacteriota	c__Thermoleophilia	o__Gaiellales	f__Gaiellaceae	g__Gaiella	s__unclassified_g__Gaiella	OTU954	0	0	0	0	0	0	2	0	2	0	4
d__Bacteria	k__norank_d__Bacteria	p__Patescibacteria	c__WWE3	o__norank_c__WWE3	f__norank_o__norank_c__WWE3	g__norank_f__norank_o__norank_c__WWE3	s__unclassified_g__norank_f__norank_o__norank_c__WWE3	OTU451	0	1	0	0	0	0	0	0	0	0	1
d__Bacteria	k__norank_d__Bacteria	p__Actinobacteriota	c__Thermoleophilia	o__Gaiellales	f__norank_o__Gaiellales	g__norank_f__norank_o__Gaiellales	s__metagenome_g__norank_f__norank_o__Gaiellales	OTU276	0	1	0	0	0	0	0	0	0	0	1
d__Bacteria	k__norank_d__Bacteria	p__Actinobacteriota	c__Acidimicrobiia	o__Microtrichales	f__Ilumatobacteraceae	g__Ilumatobacter	s__unclassified_g__Ilumatobacter	OTU604	0	0	0	0	1	8	0	3	0	7	19
d__Bacteria	k__norank_d__Bacteria	p__Proteobacteria	c__Alphaproteobacteria	o__Rhodospirillales	f__Rhodospirillaceae	g__norank_f__Rhodospirillaceae	s__metagenome_g__norank_f__Rhodospirillaceae	OTU1103	0	0	0	0	0	0	1	0	0	0	1
d__Bacteria	k__norank_d__Bacteria	p__Patescibacteria	c__Saccharimonadia	o__Saccharimonadales	f__norank_o__Saccharimonadales	g__norank_f__norank_o__Saccharimonadales	s__unclassified_g__norank_f__norank_o__Saccharimonadales	OTU589	0	0	0	0	0	0	0	3	0	0	3
d__Bacteria	k__norank_d__Bacteria	p__Proteobacteria	c__Alphaproteobacteria	o__Rhodobacterales	f__Rhodobacteraceae	g__unclassified_f__Rhodobacteraceae	s__unclassified_f__Rhodobacteraceae	OTU967	0	14	1	5	0	0	0	14	1	5	40
d__Bacteria	k__norank_d__Bacteria	p__Patescibacteria	c__Saccharimonadia	o__Saccharimonadales	f__norank_o__Saccharimonadales	g__norank_f__norank_o__Saccharimonadales	s__uncultured_Candidatus_Saccharibacteria_bacterium_g__norank_f__norank	OTU708	0	1	0	0	0	0	0	1	0	0	2
d__Bacteria	k__norank_d__Bacteria	p__Proteobacteria	c__Gammaproteobacteria	o__Pseudomonadales	f__Moraxellaceae	g__Acinetobacter	s__unclassified_g__Acinetobacter	OTU939	0	1	0	0	0	0	0	0	0	0	1
d__Bacteria	k__norank_d__Bacteria	p__Proteobacteria	c__Gammaproteobacteria	o__Methylococcales	f__Methylomonadaceae	g__unclassified_f__Methylomonadaceae	s__unclassified_f__Methylomonadaceae	OTU931	0	1	0	0	0	1	0	0	0	0	2
d__Bacteria	k__norank_d__Bacteria	p__Chloroflexi	c__Anaerolineae	o__Anaerolineales	f__Anaerolineaceae	g__norank_f__Anaerolineaceae	s__uncultured_Chloroflexi_bacterium_g__norank_f__Anaerolineaceae	OTU756	0	0	0	1	0	0	0	0	0	0	1
d__Bacteria	k__norank_d__Bacteria	p__Chloroflexi	c__Anaerolineae	o__Anaerolineales	f__Anaerolineaceae	g__norank_f__Anaerolineaceae	s__uncultured_Anaerolineaceae_bacterium_g__norank_f__Anaerolineaceae	OTU596	0	0	0	0	0	0	0	1	0	0	1
d__Bacteria	k__norank_d__Bacteria	p__Cyanobacteria	c__Cyanobacteriia	o__Chloroplast	f__norank_o__Chloroplast	g__norank_f__norank_o__Chloroplast	s__uncultured_bacterium_g__norank_f__norank_o__Chloroplast	OTU631	0	1	0	0	0	2	1	0	2	1	7
d__Bacteria	k__norank_d__Bacteria	p__Firmicutes	c__Clostridia	o__Clostridiales	f__Clostridiaceae	g__Clostridium_sensu_stricto_6	s__Clostridium_bornimense	OTU5	0	0	0	0	0	1	0	0	0	0	1
d__Bacteria	k__norank_d__Bacteria	p__Dependentiae	c__Babeliae	o__Babeliales	f__unclassified_o__Babeliales	g__unclassified_o__Babeliales	s__unclassified_o__Babeliales	OTU311	0	0	0	0	0	0	0	0	0	1	1
d__Bacteria	k__norank_d__Bacteria	p__Actinobacteriota	c__Actinobacteria	o__Frankiales	f__Acidothermaceae	g__Acidothermus	s__unclassified_g__Acidothermus	OTU334	0	1	0	0	0	0	0	0	0	0	1
d__Bacteria	k__norank_d__Bacteria	p__Fusobacteriota	c__Fusobacteriia	o__Fusobacteriales	f__Leptotrichiaceae	g__unclassified_f__Leptotrichiaceae	s__unclassified_f__Leptotrichiaceae	OTU83	0	0	1	1	0	1	0	21	0	0	24
d__Bacteria	k__norank_d__Bacteria	p__Firmicutes	c__Clostridia	o__Peptostreptococcales-Tissierellales	f__Anaerovoracaceae	g__Eubacterium_brachy_group	s__uncultured_bacterium_g__Eubacterium_brachy_group	OTU199	161	960	408	26	26	2	127	108	56	216	2090
d__Bacteria	k__norank_d__Bacteria	p__Chloroflexi	c__KD4-96	o__norank_c__KD4-96	f__norank_o__norank_c__KD4-96	g__norank_f__norank_o__norank_c__KD4-96	s__unclassified_g__norank_f__norank_o__norank_c__KD4-96	OTU106	0	3	0	0	0	2	0	1	0	0	6
d__Bacteria	k__norank_d__Bacteria	p__Firmicutes	c__Clostridia	o__unclassified_c__Clostridia	f__unclassified_c__Clostridia	g__unclassified_c__Clostridia	s__unclassified_c__Clostridia	OTU1151	0	0	0	0	0	0	0	0	0	7	7
d__Bacteria	k__norank_d__Bacteria	p__Firmicutes	c__Bacilli	o__Bacillales	f__Planococcaceae	g__Lysinibacillus	s__unclassified_g__Lysinibacillus	OTU183	0	2	0	0	1	0	0	0	0	0	3
d__Bacteria	k__norank_d__Bacteria	p__Actinobacteriota	c__Actinobacteria	o__Micromonosporales	f__Micromonosporaceae	g__unclassified_f__Micromonosporaceae	s__unclassified_f__Micromonosporaceae	OTU1170	0	0	0	0	0	0	0	0	0	9	9
d__Bacteria	k__norank_d__Bacteria	p__Proteobacteria	c__Gammaproteobacteria	o__Legionellales	f__Legionellaceae	g__Legionella	s__uncultured_bacterium_g__Legionella	OTU684	0	0	0	0	0	0	0	0	1	0	1
d__Bacteria	k__norank_d__Bacteria	p__Firmicutes	c__Bacilli	o__Mycoplasmatales	f__Mycoplasmataceae	g__Candidatus_Bacilloplasma	s__uncultured_bacterium_g__Candidatus_Bacilloplasma	OTU510	428	213	5845	1046	836	3180	517	1345	2018	135	15563
d__Bacteria	k__norank_d__Bacteria	p__Bacteroidota	c__Bacteroidia	o__Chitinophagales	f__norank_o__Chitinophagales	g__norank_f__norank_o__Chitinophagales	s__uncultured_Cytophagales_bacterium_g__norank_f__norank	OTU536	0	0	0	0	0	0	1	0	0	0	1
d__Bacteria	k__norank_d__Bacteria	p__Myxococcota	c__Myxococcia	o__Myxococcales	f__Anaeromyxobacteraceae	g__Anaeromyxobacter	s__unclassified_g__Anaeromyxobacter	OTU158	0	3	0	0	0	0	0	0	0	0	3
d__Bacteria	k__norank_d__Bacteria	p__Actinobacteriota	c__Actinobacteria	o__Kineosporiales	f__Kineosporiaceae	g__Kineococcus	s__unclassified_g__Kineococcus	OTU703	0	2	0	0	0	0	0	0	0	0	2
d__Bacteria	k__norank_d__Bacteria	p__Actinobacteriota	c__Thermoleophilia	o__Gaiellales	f__norank_o__Gaiellales	g__norank_f__norank_o__Gaiellales	s__Gaiella_sp._EBR4-RS1	OTU176	0	3	0	0	0	0	0	2	0	1	6
d__Bacteria	k__norank_d__Bacteria	p__Chloroflexi	c__Anaerolineae	o__SJA-15	f__norank_o__SJA-15	g__norank_f__norank_o__SJA-15	s__uncultured_bacterium_g__norank_f__norank_o__SJA-15	OTU112	0	0	0	0	0	2	0	0	0	0	2
d__Bacteria	k__norank_d__Bacteria	p__Actinobacteriota	c__Acidimicrobiia	o__Microtrichales	f__norank_o__Microtrichales	g__norank_f__norank_o__Microtrichales	s__metagenome_g__norank_f__norank_o__Microtrichales	OTU508	0	1	0	0	0	3	0	0	1	1	6
d__Bacteria	k__norank_d__Bacteria	p__Proteobacteria	c__Gammaproteobacteria	o__Legionellales	f__Legionellaceae	g__Legionella	s__uncultured_bacterium_g__Legionella	OTU1052	0	0	0	0	0	0	0	0	1	0	1
d__Bacteria	k__norank_d__Bacteria	p__Acidobacteriota	c__Acidobacteriae	o__Subgroup_2	f__norank_o__Subgroup_2	g__norank_f__norank_o__Subgroup_2	s__uncultured_Acidobacteria_bacterium_g__norank_f__norank_o__Subgroup_2	OTU184	1	3	0	0	0	0	0	0	1	0	5
d__Bacteria	k__norank_d__Bacteria	p__Proteobacteria	c__Gammaproteobacteria	o__Gammaproteobacteria_Incertae_Sedis	f__unclassified_o__Gammaproteobacteria_Incertae_Sedis	g__Acidibacter	s__unclassified_g__Acidibacter	OTU420	0	0	0	3	0	0	0	0	0	0	3
d__Bacteria	k__norank_d__Bacteria	p__Actinobacteriota	c__Actinobacteria	o__Propionibacteriales	f__Propionibacteriaceae	g__Propioniciclava	s__metagenome_g__Propioniciclava	OTU1006	0	0	0	0	0	0	0	0	3	0	3
d__Bacteria	k__norank_d__Bacteria	p__Actinobacteriota	c__Acidimicrobiia	o__norank_c__Acidimicrobiia	f__norank_o__norank_c__Acidimicrobiia	g__norank_f__norank_o__norank_c__Acidimicrobiia	s__uncultured_forest_soil_bacterium_g__norank_f__norank_o__norank_c__Acidimicrobiia	OTU346	1	6	0	0	0	0	0	0	0	0	7
d__Bacteria	k__norank_d__Bacteria	p__Proteobacteria	c__Alphaproteobacteria	o__Sphingomonadales	f__Sphingomonadaceae	g__Novosphingobium	s__metagenome_g__Novosphingobium	OTU59	0	1	0	0	1	0	0	1	0	0	3
d__Bacteria	k__norank_d__Bacteria	p__Bacteroidota	c__Bacteroidia	o__Flavobacteriales	f__Weeksellaceae	g__unclassified_f__Weeksellaceae	s__unclassified_f__Weeksellaceae	OTU965	0	0	0	0	0	0	10	0	2	0	12
d__Bacteria	k__norank_d__Bacteria	p__Proteobacteria	c__Gammaproteobacteria	o__Burkholderiales	f__Neisseriaceae	g__norank_f__Neisseriaceae	s__unclassified_g__norank_f__Neisseriaceae	OTU1068	0	4	0	0	0	0	0	0	0	0	4
d__Bacteria	k__norank_d__Bacteria	p__Bacteroidota	c__Bacteroidia	o__Chitinophagales	f__Chitinophagaceae	g__Dinghuibacter	s__uncultured_bacterium_g__Dinghuibacter	OTU333	0	2	0	0	0	0	0	0	0	1	3
d__Bacteria	k__norank_d__Bacteria	p__Proteobacteria	c__Alphaproteobacteria	o__Rhizobiales	f__Pleomorphomonadaceae	g__Chthonobacter	s__uncultured_bacterium_g__Chthonobacter	OTU887	0	1	0	0	0	8	0	2	0	2	13
d__Bacteria	k__norank_d__Bacteria	p__Cyanobacteria	c__Cyanobacteriia	o__Chloroplast	f__norank_o__Chloroplast	g__norank_f__norank_o__Chloroplast	s__Lepocinclis_playfairiana	OTU1036	0	0	0	0	0	0	0	1	0	0	1
d__Bacteria	k__norank_d__Bacteria	p__Patescibacteria	c__Saccharimonadia	o__Saccharimonadales	f__norank_o__Saccharimonadales	g__norank_f__norank_o__Saccharimonadales	s__uncultured_bacterium_g__norank_f__norank_o__Saccharimonadales	OTU812	422	27	0	7	1	0	7	196	236	837	1733
d__Bacteria	k__norank_d__Bacteria	p__Firmicutes	c__Clostridia	o__Lachnospirales	f__Lachnospiraceae	g__unclassified_f__Lachnospiraceae	s__unclassified_f__Lachnospiraceae	OTU948	0	0	0	0	0	0	44	0	0	0	44
d__Bacteria	k__norank_d__Bacteria	p__Proteobacteria	c__Gammaproteobacteria	o__Burkholderiales	f__Comamonadaceae	g__Hydrogenophaga	s__uncultured_bacterium_g__Hydrogenophaga	OTU922	0	2	2	0	0	1	0	0	2	10	17
d__Bacteria	k__norank_d__Bacteria	p__Deinococcota	c__Deinococci	o__Deinococcales	f__Deinococcaceae	g__Deinococcus	s__Deinococcus_soli_Cha_et_al._2016	OTU834	0	2	1	1	1	0	0	0	0	0	5
d__Bacteria	k__norank_d__Bacteria	p__Bacteroidota	c__Bacteroidia	o__Bacteroidales	f__Rikenellaceae	g__norank_f__Rikenellaceae	s__uncultured_bacterium_SHA-7	OTU961	0	0	0	0	0	0	2	0	0	0	2
d__Bacteria	k__norank_d__Bacteria	p__Campilobacterota	c__Campylobacteria	o__Campylobacterales	f__Arcobacteraceae	g__Malaciobacter	s__Arcobacter_mytili_LMG_24559	OTU655	134	0	1	0	0	0	0	0	0	0	135
d__Bacteria	k__norank_d__Bacteria	p__Actinobacteriota	c__Thermoleophilia	o__Gaiellales	f__norank_o__Gaiellales	g__norank_f__norank_o__Gaiellales	s__unclassified_g__norank_f__norank_o__Gaiellales	OTU206	0	4	0	0	1	0	0	0	0	0	5
d__Bacteria	k__norank_d__Bacteria	p__Proteobacteria	c__Alphaproteobacteria	o__Acetobacterales	f__Acetobacteraceae	g__norank_f__Acetobacteraceae	s__unclassified_g__norank_f__Acetobacteraceae	OTU370	0	4	0	0	1	1	0	0	0	0	6
d__Bacteria	k__norank_d__Bacteria	p__Proteobacteria	c__Gammaproteobacteria	o__WD260	f__norank_o__WD260	g__norank_f__norank_o__WD260	s__uncultured_bacterium_g__norank_f__norank_o__WD260	OTU223	0	5	0	0	0	0	0	0	3	0	8
d__Bacteria	k__norank_d__Bacteria	p__Proteobacteria	c__Gammaproteobacteria	o__Burkholderiales	f__Oxalobacteraceae	g__Massilia	s__uncultured_bacterium_g__Massilia	OTU391	0	0	0	0	1	0	0	0	0	0	1
d__Bacteria	k__norank_d__Bacteria	p__Actinobacteriota	c__unclassified_p__Actinobacteriota	o__unclassified_p__Actinobacteriota	f__unclassified_p__Actinobacteriota	g__unclassified_p__Actinobacteriota	s__unclassified_p__Actinobacteriota	OTU23	0	0	0	0	0	1	0	0	0	0	1
d__Bacteria	k__norank_d__Bacteria	p__Firmicutes	c__Bacilli	o__Erysipelotrichales	f__Erysipelotrichaceae	g__Anaerorhabdus_furcosa_group	s__uncultured_Anaerorhabdus_sp.	OTU573	430	58	5	81	9	1	475	95	357	452	1963
d__Bacteria	k__norank_d__Bacteria	p__Firmicutes	c__Bacilli	o__Lactobacillales	f__Enterococcaceae	g__Enterococcus	s__Enterococcus_casseliflavus_g__Enterococcus	OTU666	0	4	0	0	0	0	0	0	0	0	4
d__Bacteria	k__norank_d__Bacteria	p__Firmicutes	c__Bacilli	o__Mycoplasmatales	f__Mycoplasmataceae	g__Candidatus_Bacilloplasma	s__uncultured_bacterium_g__Candidatus_Bacilloplasma	OTU832	296	2722	93	24035	312	3447	16	17340	71	4127	52459
d__Bacteria	k__norank_d__Bacteria	p__Proteobacteria	c__Alphaproteobacteria	o__Rhizobiales	f__Hyphomicrobiaceae	g__Pedomicrobium	s__uncultured_bacterium_g__Pedomicrobium	OTU325	0	2	0	0	0	6	0	5	0	5	18
d__Bacteria	k__norank_d__Bacteria	p__Proteobacteria	c__Alphaproteobacteria	o__Micavibrionales	f__Micavibrionaceae	g__norank_f__Micavibrionaceae	s__uncultured_bacterium_g__norank_f__Micavibrionaceae	OTU190	0	1	0	0	0	0	0	0	0	0	1
d__Bacteria	k__norank_d__Bacteria	p__Proteobacteria	c__Alphaproteobacteria	o__Rhizobiales	f__Beijerinckiaceae	g__Methylocystis	s__uncultured_bacterium_g__Methylocystis	OTU1016	0	1	0	5	1	15	3	81	5	7	118
d__Bacteria	k__norank_d__Bacteria	p__Firmicutes	c__Clostridia	o__Clostridiales	f__Clostridiaceae	g__Clostridium_sensu_stricto_1	s__unclassified_g__Clostridium_sensu_stricto_1	OTU167	0	81	0	0	0	0	1	1	0	1	84
d__Bacteria	k__norank_d__Bacteria	p__Patescibacteria	c__Dojkabacteria	o__norank_c__Dojkabacteria	f__norank_o__norank_c__Dojkabacteria	g__norank_f__norank_o__norank_c__Dojkabacteria	s__Chloroflexi_bacterium_RBG_13_46_9_g__norank	OTU1161	0	0	0	0	0	0	0	0	0	2	2
d__Bacteria	k__norank_d__Bacteria	p__Acidobacteriota	c__Vicinamibacteria	o__Subgroup_17	f__norank_o__Subgroup_17	g__norank_f__norank_o__Subgroup_17	s__uncultured_Acidobacteria_bacterium_g__norank_f__norank_o__Subgroup_17	OTU1154	0	0	0	0	0	0	0	0	0	6	6
d__Bacteria	k__norank_d__Bacteria	p__Actinobacteriota	c__Actinobacteria	o__Micrococcales	f__Micrococcaceae	g__Renibacterium	s__unclassified_g__Renibacterium	OTU896	0	0	0	0	0	0	0	0	3	0	3
d__Bacteria	k__norank_d__Bacteria	p__Chloroflexi	c__Anaerolineae	o__SJA-15	f__norank_o__SJA-15	g__norank_f__norank_o__SJA-15	s__unclassified_g__norank_f__norank_o__SJA-15	OTU144	0	1	0	0	0	2	0	1	2	2	8
d__Bacteria	k__norank_d__Bacteria	p__Acidobacteriota	c__Acidobacteriae	o__Acidobacteriales	f__Acidobacteriaceae_Subgroup_1	g__Acidicapsa	s__unclassified_g__Acidicapsa	OTU45	2	0	0	0	0	0	0	0	0	0	2
d__Bacteria	k__norank_d__Bacteria	p__Firmicutes	c__Bacilli	o__unclassified_c__Bacilli	f__unclassified_c__Bacilli	g__unclassified_c__Bacilli	s__unclassified_c__Bacilli	OTU884	0	0	0	0	0	1	0	0	0	0	1
d__Bacteria	k__norank_d__Bacteria	p__Proteobacteria	c__Alphaproteobacteria	o__Sphingomonadales	f__Sphingomonadaceae	g__Porphyrobacter	s__unclassified_g__Porphyrobacter	OTU195	0	21	0	0	4	1	0	12	0	3	41
d__Bacteria	k__norank_d__Bacteria	p__Proteobacteria	c__Gammaproteobacteria	o__Burkholderiales	f__Sutterellaceae	g__norank_f__Sutterellaceae	s__unclassified_g__norank_f__Sutterellaceae	OTU1078	0	2	0	0	0	4	0	0	0	0	6
d__Bacteria	k__norank_d__Bacteria	p__Verrucomicrobiota	c__Verrucomicrobiae	o__Verrucomicrobiales	f__Verrucomicrobiaceae	g__norank_f__Verrucomicrobiaceae	s__metagenome_g__norank_f__Verrucomicrobiaceae	OTU203	0	1	0	0	0	4	0	0	0	0	5
d__Bacteria	k__norank_d__Bacteria	p__Actinobacteriota	c__Thermoleophilia	o__Gaiellales	f__norank_o__Gaiellales	g__norank_f__norank_o__Gaiellales	s__unclassified_g__norank_f__norank_o__Gaiellales	OTU755	0	0	0	2	0	0	0	0	0	0	2
d__Bacteria	k__norank_d__Bacteria	p__Actinobacteriota	c__Actinobacteria	o__Micrococcales	f__Microbacteriaceae	g__Microbacterium	s__unclassified_g__Microbacterium	OTU578	0	0	0	0	1	0	0	0	2	1	4
d__Bacteria	k__norank_d__Bacteria	p__Actinobacteriota	c__Actinobacteria	o__Propionibacteriales	f__Nocardioidaceae	g__Nocardioides	s__Nocardioides_exalbidus	OTU704	0	0	0	0	0	0	0	0	0	1	1
d__Bacteria	k__norank_d__Bacteria	p__Bacteroidota	c__Bacteroidia	o__Cytophagales	f__Spirosomaceae	g__norank_f__Spirosomaceae	s__uncultured_bacterium_g__norank_f__Spirosomaceae	OTU513	0	3	0	2	5	0	0	15	0	1	26
d__Bacteria	k__norank_d__Bacteria	p__Firmicutes	c__Bacilli	o__Mycoplasmatales	f__Mycoplasmataceae	g__unclassified_f__Mycoplasmataceae	s__unclassified_f__Mycoplasmataceae	OTU892	0	0	0	0	0	6	0	0	0	0	6
d__Bacteria	k__norank_d__Bacteria	p__Myxococcota	c__Polyangia	o__Polyangiales	f__Polyangiaceae	g__Minicystis	s__unclassified_g__Minicystis	OTU867	0	0	0	0	0	1	0	0	0	0	1
d__Bacteria	k__norank_d__Bacteria	p__Proteobacteria	c__Gammaproteobacteria	o__Burkholderiales	f__B1-7BS	g__norank_f__B1-7BS	s__uncultured_Denitratisoma_sp._g__norank_f__B1-7BS	OTU29	0	0	1	0	0	0	0	0	0	0	1
d__Bacteria	k__norank_d__Bacteria	p__Firmicutes	c__Bacilli	o__Lactobacillales	f__Lactobacillaceae	g__Lactobacillus	s__Lactobacillus_amylovorus	OTU714	0	3	0	0	1	0	0	0	0	0	4
d__Bacteria	k__norank_d__Bacteria	p__Cyanobacteria	c__Cyanobacteriia	o__Synechococcales	f__Cyanobiaceae	g__Cyanobium_PCC-6307	s__unclassified_g__Cyanobium_PCC-6307	OTU96	0	1	0	4	0	20	2	16	11	5	59
d__Bacteria	k__norank_d__Bacteria	p__Chloroflexi	c__Anaerolineae	o__SBR1031	f__A4b	g__norank_f__A4b	s__uncultured_bacterium_g__norank_f__A4b	OTU643	0	0	0	0	0	0	0	0	1	0	1
d__Bacteria	k__norank_d__Bacteria	p__Firmicutes	c__Clostridia	o__Clostridiales	f__Clostridiaceae	g__Clostridium_sensu_stricto_12	s__unclassified_g__Clostridium_sensu_stricto_12	OTU1035	0	0	0	0	1	0	0	3	0	7	11
d__Bacteria	k__norank_d__Bacteria	p__Proteobacteria	c__Alphaproteobacteria	o__Rhizobiales	f__Rhizobiaceae	g__Allorhizobium-Neorhizobium-Pararhizobium-Rhizobium	s__unclassified_g__Allorhizobium-Neorhizobium-Pararhizobium-Rhizobium	OTU865	0	7	0	0	0	11	0	9	0	10	37
d__Bacteria	k__norank_d__Bacteria	p__Firmicutes	c__Bacilli	o__Entomoplasmatales	f__Entomoplasmatales_Incertae_Sedis	g__Candidatus_Hepatoplasma	s__unclassified_g__Candidatus_Hepatoplasma	OTU555	1943	3776	8118	304	3144	5401	37	90	0	15101	37914
d__Bacteria	k__norank_d__Bacteria	p__Bacteroidota	c__Bacteroidia	o__Chitinophagales	f__Chitinophagaceae	g__Flavisolibacter	s__uncultured_bacterium_g__Flavisolibacter	OTU585	0	0	0	0	3	0	0	0	0	0	3
d__Bacteria	k__norank_d__Bacteria	p__Proteobacteria	c__Gammaproteobacteria	o__Pseudomonadales	f__Moraxellaceae	g__Acinetobacter	s__unclassified_g__Acinetobacter	OTU215	1	20	47	3	1	1	36	0	0	1	110
d__Bacteria	k__norank_d__Bacteria	p__Proteobacteria	c__Alphaproteobacteria	o__Rhizobiales	f__Beijerinckiaceae	g__Roseiarcus	s__uncultured_bacterium_g__Roseiarcus	OTU212	0	11	0	0	0	0	0	0	3	0	14
d__Bacteria	k__norank_d__Bacteria	p__Acidobacteriota	c__Vicinamibacteria	o__Vicinamibacterales	f__Vicinamibacteraceae	g__Luteitalea	s__uncultured_bacterium_g__Luteitalea	OTU26	0	0	0	0	0	1	0	0	0	0	1
d__Bacteria	k__norank_d__Bacteria	p__Firmicutes	c__Bacilli	o__Mycoplasmatales	f__Mycoplasmataceae	g__norank_f__Mycoplasmataceae	s__uncultured_Firmicutes_bacterium_g__norank_f__Mycoplasmataceae	OTU1149	74	0	0	0	4	0	11	0	1338	1380	2807
d__Bacteria	k__norank_d__Bacteria	p__Firmicutes	c__Clostridia	o__Clostridiales	f__Clostridiaceae	g__Clostridium_sensu_stricto_12	s__Clostridium_luticellarii	OTU219	0	3	0	0	0	0	0	0	1	0	4
d__Bacteria	k__norank_d__Bacteria	p__Acidobacteriota	c__Acidobacteriae	o__Solibacterales	f__Solibacteraceae	g__Candidatus_Solibacter	s__uncultured_bacterium_g__Candidatus_Solibacter	OTU584	0	0	0	0	3	0	0	0	0	0	3
d__Bacteria	k__norank_d__Bacteria	p__Proteobacteria	c__Gammaproteobacteria	o__Burkholderiales	f__Comamonadaceae	g__Ramlibacter	s__unclassified_g__Ramlibacter	OTU281	0	5	0	0	2	0	0	14	0	1	22
d__Bacteria	k__norank_d__Bacteria	p__Bacteroidota	c__Bacteroidia	o__Bacteroidales	f__Prolixibacteraceae	g__Roseimarinus	s__uncultured_bacterium_g__Roseimarinus	OTU1100	0	0	0	0	0	0	1	0	0	0	1
d__Bacteria	k__norank_d__Bacteria	p__Actinobacteriota	c__Acidimicrobiia	o__Microtrichales	f__Microtrichaceae	g__Sva0996_marine_group	s__unclassified_g__Sva0996_marine_group	OTU736	0	0	0	0	0	0	0	0	0	3	3
d__Bacteria	k__norank_d__Bacteria	p__Firmicutes	c__Clostridia	o__Lachnospirales	f__Lachnospiraceae	g__norank_f__Lachnospiraceae	s__uncultured_Roseburia_sp._g__norank	OTU1033	0	0	0	0	0	0	0	8	0	0	8
d__Bacteria	k__norank_d__Bacteria	p__Patescibacteria	c__CPR2	o__norank_c__CPR2	f__norank_o__norank_c__CPR2	g__norank_f__norank_o__norank_c__CPR2	s__uncultured_bacterium_g__norank_f__norank_o__norank_c__CPR2	OTU66	0	0	0	0	0	0	0	0	0	1	1
d__Bacteria	k__norank_d__Bacteria	p__Bacteroidota	c__Bacteroidia	o__Flavobacteriales	f__Flavobacteriaceae	g__Actibacter	s__uncultured_bacterium_g__Actibacter	OTU457	0	0	0	0	0	1	0	0	0	0	1
d__Bacteria	k__norank_d__Bacteria	p__Firmicutes	c__Clostridia	o__Lachnospirales	f__Lachnospiraceae	g__unclassified_f__Lachnospiraceae	s__unclassified_f__Lachnospiraceae	OTU14	0	0	0	0	0	0	0	0	0	1	1
d__Bacteria	k__norank_d__Bacteria	p__Patescibacteria	c__Saccharimonadia	o__Saccharimonadales	f__Saccharimonadaceae	g__unclassified_f__Saccharimonadaceae	s__unclassified_f__Saccharimonadaceae	OTU822	0	2	0	8	0	0	9	0	17	0	36
d__Bacteria	k__norank_d__Bacteria	p__Bacteroidota	c__Bacteroidia	o__Flavobacteriales	f__Weeksellaceae	g__Cloacibacterium	s__unclassified_g__Cloacibacterium	OTU563	0	2	0	0	0	0	0	1	0	10	13
d__Bacteria	k__norank_d__Bacteria	p__Cyanobacteria	c__Cyanobacteriia	o__Chloroplast	f__norank_o__Chloroplast	g__norank_f__norank_o__Chloroplast	s__unclassified_g__norank_f__norank_o__Chloroplast	OTU1162	0	0	0	0	0	0	0	0	0	1	1
d__Bacteria	k__norank_d__Bacteria	p__Verrucomicrobiota	c__Chlamydiae	o__Chlamydiales	f__Parachlamydiaceae	g__unclassified_f__Parachlamydiaceae	s__unclassified_f__Parachlamydiaceae	OTU164	0	3	0	0	0	0	0	0	0	0	3
d__Bacteria	k__norank_d__Bacteria	p__Actinobacteriota	c__Coriobacteriia	o__OPB41	f__norank_o__OPB41	g__norank_f__norank_o__OPB41	s__unclassified_g__norank_f__norank_o__OPB41	OTU1064	0	0	0	0	0	4	1	0	0	7	12
d__Bacteria	k__norank_d__Bacteria	p__Proteobacteria	c__Gammaproteobacteria	o__Burkholderiales	f__Burkholderiaceae	g__unclassified_f__Burkholderiaceae	s__unclassified_f__Burkholderiaceae	OTU307	0	0	0	0	1	0	0	0	0	0	1
d__Bacteria	k__norank_d__Bacteria	p__Proteobacteria	c__Gammaproteobacteria	o__Run-SP154	f__norank_o__Run-SP154	g__norank_f__norank_o__Run-SP154	s__uncultured_bacterium_g__norank_f__norank_o__Run-SP154	OTU556	0	0	0	0	0	0	1	0	0	0	1
d__Bacteria	k__norank_d__Bacteria	p__Actinobacteriota	c__Thermoleophilia	o__Gaiellales	f__norank_o__Gaiellales	g__norank_f__norank_o__Gaiellales	s__metagenome_g__norank_f__norank_o__Gaiellales	OTU929	0	0	0	0	0	0	0	2	1	0	3
d__Bacteria	k__norank_d__Bacteria	p__Cyanobacteria	c__Cyanobacteriia	o__Chloroplast	f__norank_o__Chloroplast	g__norank_f__norank_o__Chloroplast	s__unclassified_g__norank_f__norank_o__Chloroplast	OTU419	0	0	0	2	0	0	0	0	0	0	2
d__Bacteria	k__norank_d__Bacteria	p__Firmicutes	c__Bacilli	o__Lactobacillales	f__Lactobacillaceae	g__Lactobacillus	s__Lactobacillus_mucosae_LM1	OTU410	0	0	0	2	0	0	0	0	0	0	2
d__Bacteria	k__norank_d__Bacteria	p__Firmicutes	c__Clostridia	o__Eubacteriales	f__Eubacteriaceae	g__Acetobacterium	s__uncultured_bacterium_g__Acetobacterium	OTU690	0	0	0	0	0	1	0	0	0	0	1
d__Bacteria	k__norank_d__Bacteria	p__Bacteroidota	c__Bacteroidia	o__Flavobacteriales	f__Weeksellaceae	g__Chryseobacterium	s__unclassified_g__Chryseobacterium	OTU208	0	56	0	0	0	0	0	0	0	0	56
d__Bacteria	k__norank_d__Bacteria	p__Proteobacteria	c__Alphaproteobacteria	o__Sphingomonadales	f__Sphingomonadaceae	g__Sphingorhabdus	s__uncultured_bacterium_g__Sphingorhabdus	OTU109	0	0	0	0	0	0	0	2	0	0	2
d__Bacteria	k__norank_d__Bacteria	p__Actinobacteriota	c__Acidimicrobiia	o__Microtrichales	f__Ilumatobacteraceae	g__Ilumatobacter	s__uncultured_bacterium_g__Ilumatobacter	OTU1142	0	1	0	0	1	8	0	3	0	4	17
d__Bacteria	k__norank_d__Bacteria	p__Proteobacteria	c__Alphaproteobacteria	o__Rhizobiales	f__Beijerinckiaceae	g__Bosea	s__unclassified_g__Bosea	OTU143	0	0	0	0	0	1	0	0	0	4	5
d__Bacteria	k__norank_d__Bacteria	p__Proteobacteria	c__Gammaproteobacteria	o__Burkholderiales	f__Burkholderiaceae	g__Polynucleobacter	s__uncultured_bacterium_g__Polynucleobacter	OTU431	0	0	0	0	0	1	0	0	0	1	2
d__Bacteria	k__norank_d__Bacteria	p__Proteobacteria	c__Gammaproteobacteria	o__Vibrionales	f__Vibrionaceae	g__Vibrio	s__Vibrio_campbellii	OTU642	1245	4	0	213	207	40	47	0	0	260	2016
d__Bacteria	k__norank_d__Bacteria	p__Myxococcota	c__Polyangia	o__Polyangiales	f__Polyangiaceae	g__Pajaroellobacter	s__unclassified_g__Pajaroellobacter	OTU1049	0	0	0	0	0	0	0	0	2	0	2
d__Bacteria	k__norank_d__Bacteria	p__Proteobacteria	c__Gammaproteobacteria	o__Vibrionales	f__Vibrionaceae	g__Vibrio	s__unclassified_g__Vibrio	OTU57	0	6	0	0	0	0	0	0	0	0	6
d__Bacteria	k__norank_d__Bacteria	p__Desulfobacterota	c__Syntrophobacteria	o__Syntrophobacterales	f__norank_o__Syntrophobacterales	g__norank_f__norank_o__Syntrophobacterales	s__uncultured_bacterium_g__norank_f__norank_o__Syntrophobacterales	OTU247	0	0	0	0	0	0	0	1	0	0	1
d__Bacteria	k__norank_d__Bacteria	p__Bacteroidota	c__Bacteroidia	o__Flavobacteriales	f__Weeksellaceae	g__Chryseobacterium	s__unclassified_g__Chryseobacterium	OTU1026	0	0	6	23	1	1	0	18	0	0	49
d__Bacteria	k__norank_d__Bacteria	p__Chloroflexi	c__Anaerolineae	o__Anaerolineales	f__Anaerolineaceae	g__norank_f__Anaerolineaceae	s__uncultured_Chloroflexi_bacterium_g__norank_f__Anaerolineaceae	OTU1136	0	0	0	0	0	1	0	0	0	0	1
d__Bacteria	k__norank_d__Bacteria	p__Proteobacteria	c__Gammaproteobacteria	o__Oceanospirillales	f__Halomonadaceae	g__Halomonas	s__metagenome_g__Halomonas	OTU188	0	3	0	0	0	0	0	0	0	1	4
d__Bacteria	k__norank_d__Bacteria	p__Proteobacteria	c__Gammaproteobacteria	o__unclassified_c__Gammaproteobacteria	f__unclassified_c__Gammaproteobacteria	g__unclassified_c__Gammaproteobacteria	s__unclassified_c__Gammaproteobacteria	OTU1158	0	0	0	0	0	0	0	0	0	2	2
d__Bacteria	k__norank_d__Bacteria	p__Proteobacteria	c__Gammaproteobacteria	o__Burkholderiales	f__Comamonadaceae	g__Comamonas	s__Comamonas_aquatica	OTU957	0	3	0	0	1	0	1	0	0	1	6
d__Bacteria	k__norank_d__Bacteria	p__Proteobacteria	c__Alphaproteobacteria	o__Rhodobacterales	f__Rhodobacteraceae	g__Rubellimicrobium	s__unclassified_g__Rubellimicrobium	OTU881	0	0	0	0	0	5	0	4	0	0	9
d__Bacteria	k__norank_d__Bacteria	p__Acidobacteriota	c__Acidobacteriae	o__Acidobacteriales	f__norank_o__Acidobacteriales	g__norank_f__norank_o__Acidobacteriales	s__uncultured_Acidobacteria_bacterium_g__norank_f__norank_o__Acidobacteriales	OTU424	0	0	0	2	0	0	0	0	0	0	2
d__Bacteria	k__norank_d__Bacteria	p__Desulfobacterota	c__Desulfobaccia	o__Desulfobaccales	f__Desulfobaccaceae	g__Desulfobacca	s__uncultured_bacterium_g__Desulfobacca	OTU790	0	0	0	1	0	0	0	2	2	0	5
d__Bacteria	k__norank_d__Bacteria	p__Firmicutes	c__Clostridia	o__Lachnospirales	f__Lachnospiraceae	g__unclassified_f__Lachnospiraceae	s__unclassified_f__Lachnospiraceae	OTU594	0	3	1	0	18	38	9	94	1	4	168
d__Bacteria	k__norank_d__Bacteria	p__Firmicutes	c__Clostridia	o__Lachnospirales	f__Lachnospiraceae	g__Ruminococcus_torques_group	s__unclassified_g__Ruminococcus_torques_group	OTU863	0	0	0	0	0	1	0	0	0	0	1
d__Bacteria	k__norank_d__Bacteria	p__Proteobacteria	c__Alphaproteobacteria	o__Rhizobiales	f__Rhizobiales_Incertae_Sedis	g__norank_f__Rhizobiales_Incertae_Sedis	s__unclassified_g__norank_f__Rhizobiales_Incertae_Sedis	OTU1037	0	0	0	0	0	1	0	7	0	2	10
d__Bacteria	k__norank_d__Bacteria	p__Verrucomicrobiota	c__Verrucomicrobiae	o__Chthoniobacterales	f__Chthoniobacteraceae	g__Candidatus_Udaeobacter	s__uncultured_Prosthecobacter_sp._g__Candidatus_Udaeobacter	OTU947	0	0	0	0	0	0	2	0	0	0	2
d__Bacteria	k__norank_d__Bacteria	p__Chloroflexi	c__Anaerolineae	o__SJA-15	f__norank_o__SJA-15	g__norank_f__norank_o__SJA-15	s__uncultured_bacterium_g__norank_f__norank_o__SJA-15	OTU744	0	0	0	0	0	2	0	1	0	1	4
d__Bacteria	k__norank_d__Bacteria	p__Bacteroidota	c__Bacteroidia	o__Cytophagales	f__Spirosomaceae	g__unclassified_f__Spirosomaceae	s__unclassified_f__Spirosomaceae	OTU586	0	0	0	0	2	0	0	0	0	0	2
d__Bacteria	k__norank_d__Bacteria	p__Actinobacteriota	c__Acidimicrobiia	o__Microtrichales	f__Ilumatobacteraceae	g__CL500-29_marine_group	s__metagenome_g__CL500-29_marine_group	OTU1135	0	3	0	2	0	10	0	4	1	5	25
d__Bacteria	k__norank_d__Bacteria	p__Bacteroidota	c__Bacteroidia	o__Bacteroidales	f__Prolixibacteraceae	g__Roseimarinus	s__uncultured_bacterium_g__Roseimarinus	OTU844	0	0	0	0	0	0	0	0	1	12	13
d__Bacteria	k__norank_d__Bacteria	p__Proteobacteria	c__Gammaproteobacteria	o__Pseudomonadales	f__Moraxellaceae	g__Acinetobacter	s__Acinetobacter_sp._CIP_64.2	OTU514	0	15	0	0	0	0	0	0	0	1	16
d__Bacteria	k__norank_d__Bacteria	p__Proteobacteria	c__Gammaproteobacteria	o__Pseudomonadales	f__Moraxellaceae	g__Acinetobacter	s__unclassified_g__Acinetobacter	OTU505	3	57	0	0	4	0	0	0	0	4	68
d__Bacteria	k__norank_d__Bacteria	p__Proteobacteria	c__Alphaproteobacteria	o__Rhodobacterales	f__Rhodobacteraceae	g__Gemmobacter	s__unclassified_g__Gemmobacter	OTU1061	0	4	0	1	0	4	0	10	0	9	28
d__Bacteria	k__norank_d__Bacteria	p__Firmicutes	c__Clostridia	o__Oscillospirales	f__Butyricicoccaceae	g__Butyricicoccus	s__unclassified_g__Butyricicoccus	OTU567	0	0	0	0	0	1	0	0	0	0	1
d__Bacteria	k__norank_d__Bacteria	p__Cyanobacteria	c__Cyanobacteriia	o__Cyanobacteriales	f__Phormidiaceae	g__Planktothrix_NIVA-CYA_15	s__bacterium_enrichment_culture_clone_B1252011	OTU610	0	1	0	0	0	0	0	0	0	0	1
d__Bacteria	k__norank_d__Bacteria	p__Desulfobacterota	c__Desulfobacteria	o__Desulfobacterales	f__Desulfosarcinaceae	g__Sva0081_sediment_group	s__uncultured_bacterium_g__Sva0081_sediment_group	OTU233	0	1	0	0	0	0	0	0	0	0	1
d__Bacteria	k__norank_d__Bacteria	p__Cyanobacteria	c__Cyanobacteriia	o__Cyanobacteriales	f__Nostocaceae	g__Nostoc_PCC-7524	s__unclassified_g__Nostoc_PCC-7524	OTU767	0	0	0	0	0	0	0	0	0	1	1
d__Bacteria	k__norank_d__Bacteria	p__Firmicutes	c__Bacilli	o__Bacillales	f__Planococcaceae	g__Jeotgalibacillus	s__Jeotgalibacillus_malaysiensis	OTU898	0	0	0	0	0	1	0	1	0	1	3
d__Bacteria	k__norank_d__Bacteria	p__Proteobacteria	c__Alphaproteobacteria	o__Azospirillales	f__Azospirillaceae	g__Azospirillum	s__unclassified_g__Azospirillum	OTU1166	0	0	0	0	0	0	0	0	0	2	2
d__Bacteria	k__norank_d__Bacteria	p__Actinobacteriota	c__Actinobacteria	o__Micrococcales	f__Micrococcaceae	g__Kocuria	s__unclassified_g__Kocuria	OTU649	0	0	0	0	0	1	0	0	0	2	3
d__Bacteria	k__norank_d__Bacteria	p__Proteobacteria	c__Alphaproteobacteria	o__Acetobacterales	f__Acetobacteraceae	g__Roseomonas	s__unclassified_g__Roseomonas	OTU53	0	0	0	0	0	0	0	1	0	0	1
d__Bacteria	k__norank_d__Bacteria	p__Firmicutes	c__Clostridia	o__Lachnospirales	f__Lachnospiraceae	g__Cellulosilyticum	s__unclassified_g__Cellulosilyticum	OTU815	0	0	0	0	0	0	0	2	0	0	2
d__Bacteria	k__norank_d__Bacteria	p__Firmicutes	c__Clostridia	o__Peptostreptococcales-Tissierellales	f__Thermotaleaceae	g__Crassaminicella	s__Marinisporobacter_sp.	OTU1093	0	0	0	0	0	0	0	1	0	0	1
d__Bacteria	k__norank_d__Bacteria	p__Bacteroidota	c__Bacteroidia	o__Chitinophagales	f__Saprospiraceae	g__norank_f__Saprospiraceae	s__uncultured_bacterium_g__norank_f__Saprospiraceae	OTU480	0	1	0	0	0	0	0	1	0	0	2
d__Bacteria	k__norank_d__Bacteria	p__Proteobacteria	c__Alphaproteobacteria	o__Rhizobiales	f__unclassified_o__Rhizobiales	g__unclassified_o__Rhizobiales	s__unclassified_o__Rhizobiales	OTU1018	0	0	0	0	0	1	0	4	1	2	8
d__Bacteria	k__norank_d__Bacteria	p__Actinobacteriota	c__Actinobacteria	o__Propionibacteriales	f__Nocardioidaceae	g__Nocardioides	s__Nocardioides_sp._g__Nocardioides	OTU17	0	2	0	0	0	0	0	0	0	0	2
d__Bacteria	k__norank_d__Bacteria	p__Proteobacteria	c__Alphaproteobacteria	o__Holosporales	f__Holosporaceae	g__norank_f__Holosporaceae	s__uncultured_bacterium_g__norank_f__Holosporaceae	OTU603	0	0	0	0	0	3	0	0	0	1	4
d__Bacteria	k__norank_d__Bacteria	p__Chloroflexi	c__Anaerolineae	o__SJA-15	f__norank_o__SJA-15	g__norank_f__norank_o__SJA-15	s__unclassified_g__norank_f__norank_o__SJA-15	OTU1129	0	0	0	0	0	2	0	0	1	1	4
d__Bacteria	k__norank_d__Bacteria	p__RCP2-54	c__norank_p__RCP2-54	o__norank_c__norank_p__RCP2-54	f__norank_o__norank_c__norank_p__RCP2-54	g__norank_f__norank_o__norank_c__norank_p__RCP2-54	s__uncultured_bacterium_g__norank_f__norank_o__norank_c__norank_p__RCP2-54	OTU1043	0	0	0	0	0	0	0	0	3	0	3
d__Bacteria	k__norank_d__Bacteria	p__Actinobacteriota	c__Thermoleophilia	o__Gaiellales	f__norank_o__Gaiellales	g__norank_f__norank_o__Gaiellales	s__unclassified_g__norank_f__norank_o__Gaiellales	OTU741	0	0	0	0	0	0	0	0	0	1	1
d__Bacteria	k__norank_d__Bacteria	p__Actinobacteriota	c__Acidimicrobiia	o__Microtrichales	f__Iamiaceae	g__Iamia	s__metagenome_g__Iamia	OTU770	0	0	0	0	0	3	0	1	0	0	4
d__Bacteria	k__norank_d__Bacteria	p__Firmicutes	c__Bacilli	o__Entomoplasmatales	f__Entomoplasmatales_Incertae_Sedis	g__Candidatus_Hepatoplasma	s__Astacus_leptodactylus_narrow-clawed_crayfish	OTU407	747	497	267	1	1883	152	19	14	0	274	3854
d__Bacteria	k__norank_d__Bacteria	p__Actinobacteriota	c__Actinobacteria	o__PeM15	f__norank_o__PeM15	g__norank_f__norank_o__PeM15	s__unclassified_g__norank_f__norank_o__PeM15	OTU679	0	0	0	1	0	2	1	2	2	1	9
d__Bacteria	k__norank_d__Bacteria	p__Actinobacteriota	c__Acidimicrobiia	o__Microtrichales	f__Ilumatobacteraceae	g__CL500-29_marine_group	s__uncultured_bacterium_g__CL500-29_marine_group	OTU124	0	1	0	0	0	0	0	0	0	0	1
d__Bacteria	k__norank_d__Bacteria	p__Cyanobacteria	c__Cyanobacteriia	o__Synechococcales	f__Cyanobiaceae	g__Cyanobium_PCC-6307	s__unclassified_g__Cyanobium_PCC-6307	OTU1144	0	2	1	7	0	21	6	31	22	11	101
d__Bacteria	k__norank_d__Bacteria	p__Proteobacteria	c__Gammaproteobacteria	o__Gammaproteobacteria_Incertae_Sedis	f__unclassified_o__Gammaproteobacteria_Incertae_Sedis	g__Candidatus_Berkiella	s__unclassified_g__Candidatus_Berkiella	OTU720	0	0	0	0	0	0	0	0	0	1	1
d__Bacteria	k__norank_d__Bacteria	p__Acidobacteriota	c__Vicinamibacteria	o__Subgroup_17	f__norank_o__Subgroup_17	g__norank_f__norank_o__Subgroup_17	s__unclassified_g__norank_f__norank_o__Subgroup_17	OTU860	0	1	0	0	0	5	0	1	1	0	8
d__Bacteria	k__norank_d__Bacteria	p__Chloroflexi	c__Anaerolineae	o__Anaerolineales	f__Anaerolineaceae	g__norank_f__Anaerolineaceae	s__unclassified_g__norank_f__Anaerolineaceae	OTU784	0	0	0	0	0	2	0	0	0	1	3
d__Bacteria	k__norank_d__Bacteria	p__Patescibacteria	c__Saccharimonadia	o__Saccharimonadales	f__norank_o__Saccharimonadales	g__norank_f__norank_o__Saccharimonadales	s__uncultured_bacterium_g__norank_f__norank_o__Saccharimonadales	OTU1127	0	2	0	0	0	0	0	0	0	0	2
d__Bacteria	k__norank_d__Bacteria	p__Chloroflexi	c__Anaerolineae	o__Caldilineales	f__Caldilineaceae	g__norank_f__Caldilineaceae	s__uncultured_Anaerolineaceae_bacterium_g__norank_f__Caldilineaceae	OTU256	0	0	0	0	0	1	0	0	0	0	1
d__Bacteria	k__norank_d__Bacteria	p__Desulfobacterota	c__Desulfobaccia	o__Desulfobaccales	f__Desulfobaccaceae	g__Desulfobacca	s__unclassified_g__Desulfobacca	OTU674	0	0	0	0	0	1	0	1	0	0	2
d__Bacteria	k__norank_d__Bacteria	p__Proteobacteria	c__Alphaproteobacteria	o__Caulobacterales	f__Parvularculaceae	g__Amphiplicatus	s__uncultured_Alphaproteobacteria_bacterium_g__Amphiplicatus	OTU331	0	0	0	0	0	0	1	0	0	0	1
d__Bacteria	k__norank_d__Bacteria	p__Actinobacteriota	c__Acidimicrobiia	o__Microtrichales	f__Ilumatobacteraceae	g__CL500-29_marine_group	s__uncultured_marine_bacterium_g__CL500-29_marine_group	OTU781	0	3	1	0	0	0	0	1	0	0	5
d__Bacteria	k__norank_d__Bacteria	p__Firmicutes	c__Bacilli	o__Mycoplasmatales	f__Mycoplasmataceae	g__Candidatus_Bacilloplasma	s__uncultured_bacterium_g__Candidatus_Bacilloplasma	OTU165	1	3	0	3	0	0	5	3	12	3	30
d__Bacteria	k__norank_d__Bacteria	p__Verrucomicrobiota	c__Verrucomicrobiae	o__Verrucomicrobiales	f__Verrucomicrobiaceae	g__norank_f__Verrucomicrobiaceae	s__uncultured_Verrucomicrobia_bacterium_g__norank_f__Verrucomicrobiaceae	OTU936	0	0	0	0	0	1	0	0	0	1	2
d__Bacteria	k__norank_d__Bacteria	p__Chloroflexi	c__Ktedonobacteria	o__Ktedonobacterales	f__Ktedonobacteraceae	g__unclassified_f__Ktedonobacteraceae	s__unclassified_f__Ktedonobacteraceae	OTU951	0	0	0	0	0	0	3	0	0	0	3
d__Bacteria	k__norank_d__Bacteria	p__Actinobacteriota	c__Acidimicrobiia	o__Actinomarinales	f__norank_o__Actinomarinales	g__norank_f__norank_o__Actinomarinales	s__uncultured_actinobacterium_g__norank_f__norank_o__Actinomarinales	OTU575	0	0	0	1	0	1	0	0	0	1	3
d__Bacteria	k__norank_d__Bacteria	p__Bacteroidota	c__Bacteroidia	o__Bacteroidales	f__Williamwhitmaniaceae	g__Blvii28_wastewater-sludge_group	s__unclassified_g__Blvii28_wastewater-sludge_group	OTU579	0	0	0	0	2	0	0	0	0	0	2
d__Bacteria	k__norank_d__Bacteria	p__Verrucomicrobiota	c__Verrucomicrobiae	o__Verrucomicrobiales	f__Rubritaleaceae	g__Luteolibacter	s__uncultured_bacterium_g__Luteolibacter	OTU411	0	0	0	1	0	0	0	0	0	0	1
d__Bacteria	k__norank_d__Bacteria	p__Firmicutes	c__Clostridia	o__Lachnospirales	f__Lachnospiraceae	g__Blautia	s__unclassified_g__Blautia	OTU500	0	2	0	0	0	0	2	0	0	0	4
d__Bacteria	k__norank_d__Bacteria	p__Proteobacteria	c__Alphaproteobacteria	o__Rhodobacterales	f__Rhodobacteraceae	g__Paracoccus	s__unclassified_g__Paracoccus	OTU846	0	15	1	3	1	2	3	7	4	15	51
d__Bacteria	k__norank_d__Bacteria	p__Proteobacteria	c__Gammaproteobacteria	o__Pseudomonadales	f__Moraxellaceae	g__Acinetobacter	s__Acinetobacter_sp._ACNIH1	OTU198	0	3	0	0	0	0	0	1	0	0	4
d__Bacteria	k__norank_d__Bacteria	p__Firmicutes	c__Bacilli	o__Lactobacillales	f__Leuconostocaceae	g__Weissella	s__Weissella_paramesenteroides	OTU193	0	2	0	0	0	0	0	0	0	0	2
d__Bacteria	k__norank_d__Bacteria	p__Bacteroidota	c__Bacteroidia	o__Flavobacteriales	f__Flavobacteriaceae	g__Flavobacterium	s__unclassified_g__Flavobacterium	OTU1024	0	0	0	0	2	2	1	2	0	5	12
d__Bacteria	k__norank_d__Bacteria	p__Proteobacteria	c__Gammaproteobacteria	o__Methylococcales	f__Methylomonadaceae	g__unclassified_f__Methylomonadaceae	s__unclassified_f__Methylomonadaceae	OTU239	0	0	0	0	0	0	0	0	1	0	1
d__Bacteria	k__norank_d__Bacteria	p__Firmicutes	c__Clostridia	o__Lachnospirales	f__Lachnospiraceae	g__Epulopiscium	s__unclassified_g__Epulopiscium	OTU1164	0	0	0	0	0	0	0	0	0	2	2
d__Bacteria	k__norank_d__Bacteria	p__Firmicutes	c__Bacilli	o__Mycoplasmatales	f__Mycoplasmataceae	g__norank_f__Mycoplasmataceae	s__uncultured_Firmicutes_bacterium_g__norank_f__Mycoplasmataceae	OTU760	0	1	0	0	0	0	0	0	0	0	1
d__Bacteria	k__norank_d__Bacteria	p__Actinobacteriota	c__Actinobacteria	o__Frankiales	f__Sporichthyaceae	g__unclassified_f__Sporichthyaceae	s__unclassified_f__Sporichthyaceae	OTU111	0	0	0	0	0	1	0	0	0	1	2
d__Bacteria	k__norank_d__Bacteria	p__Proteobacteria	c__Gammaproteobacteria	o__Enterobacterales	f__Enterobacteriaceae	g__Enterobacter	s__unclassified_g__Enterobacter	OTU422	23	32	0	1	0	64	9	8	1	2	140
d__Bacteria	k__norank_d__Bacteria	p__Acidobacteriota	c__Acidobacteriae	o__Acidobacteriales	f__norank_o__Acidobacteriales	g__norank_f__norank_o__Acidobacteriales	s__uncultured_bacterium_g__norank_f__norank_o__Acidobacteriales	OTU581	0	5	0	0	3	0	0	0	0	0	8
d__Bacteria	k__norank_d__Bacteria	p__Firmicutes	c__Clostridia	o__Lachnospirales	f__Lachnospiraceae	g__unclassified_f__Lachnospiraceae	s__unclassified_f__Lachnospiraceae	OTU757	0	0	0	0	0	0	0	0	0	1	1
d__Bacteria	k__norank_d__Bacteria	p__Firmicutes	c__Bacilli	o__Bacillales	f__Bacillaceae	g__Bacillus	s__Bacillus_selenatarsenatis	OTU436	0	0	0	0	0	0	0	0	0	7	7
d__Bacteria	k__norank_d__Bacteria	p__Proteobacteria	c__Gammaproteobacteria	o__Methylococcales	f__Methylomonadaceae	g__Crenothrix	s__Crenothrix_polyspora	OTU912	0	0	0	0	0	0	0	1	0	0	1
d__Bacteria	k__norank_d__Bacteria	p__Proteobacteria	c__Alphaproteobacteria	o__Rhodobacterales	f__Rhodobacteraceae	g__Roseovarius	s__unclassified_g__Roseovarius	OTU905	0	2	0	0	0	0	0	1	0	1	4
d__Bacteria	k__norank_d__Bacteria	p__Proteobacteria	c__Gammaproteobacteria	o__Xanthomonadales	f__Xanthomonadaceae	g__unclassified_f__Xanthomonadaceae	s__unclassified_f__Xanthomonadaceae	OTU910	0	1	0	0	0	0	0	0	1	0	2
d__Bacteria	k__norank_d__Bacteria	p__Desulfobacterota	c__Syntrophobacteria	o__Syntrophobacterales	f__Syntrophobacteraceae	g__Syntrophobacter	s__unclassified_g__Syntrophobacter	OTU978	0	0	0	0	0	1	0	0	0	0	1
d__Bacteria	k__norank_d__Bacteria	p__Firmicutes	c__Clostridia	o__Clostridiales	f__Clostridiaceae	g__Clostridium_sensu_stricto_13	s__unclassified_g__Clostridium_sensu_stricto_13	OTU977	0	0	0	0	0	0	0	1	0	0	1
d__Bacteria	k__norank_d__Bacteria	p__Proteobacteria	c__Alphaproteobacteria	o__Rhizobiales	f__Hyphomicrobiaceae	g__unclassified_f__Hyphomicrobiaceae	s__unclassified_f__Hyphomicrobiaceae	OTU225	0	1	0	0	0	1	0	2	0	2	6
d__Bacteria	k__norank_d__Bacteria	p__Verrucomicrobiota	c__Verrucomicrobiae	o__Verrucomicrobiales	f__Rubritaleaceae	g__Luteolibacter	s__uncultured_bacterium_g__Luteolibacter	OTU1085	0	0	0	0	0	0	0	0	0	1	1
d__Bacteria	k__norank_d__Bacteria	p__Patescibacteria	c__Saccharimonadia	o__Saccharimonadales	f__Saccharimonadaceae	g__TM7a	s__uncultured_bacterium_g__TM7a	OTU617	0	0	0	0	0	1	0	0	0	0	1
d__Bacteria	k__norank_d__Bacteria	p__Chloroflexi	c__Anaerolineae	o__norank_c__Anaerolineae	f__norank_o__norank_c__Anaerolineae	g__norank_f__norank_o__norank_c__Anaerolineae	s__uncultured_Chloroflexi_bacterium_g__norank_f__norank_o__norank_c__Anaerolineae	OTU824	0	0	0	0	0	0	0	0	0	1	1
d__Bacteria	k__norank_d__Bacteria	p__Proteobacteria	c__Alphaproteobacteria	o__Sphingomonadales	f__Sphingomonadaceae	g__Sandaracinobacter	s__uncultured_bacterium_g__Sandaracinobacter	OTU163	0	1	0	0	0	0	0	0	0	0	1
d__Bacteria	k__norank_d__Bacteria	p__Proteobacteria	c__Gammaproteobacteria	o__Methylococcales	f__Methylococcaceae	g__Methyloparacoccus	s__uncultured_bacterium_g__Methyloparacoccus	OTU925	0	0	0	0	0	2	0	4	1	0	7
d__Bacteria	k__norank_d__Bacteria	p__Proteobacteria	c__Alphaproteobacteria	o__Rhizobiales	f__Xanthobacteraceae	g__norank_f__Xanthobacteraceae	s__uncultured_bacterium_g__norank_f__Xanthobacteraceae	OTU210	0	15	0	0	0	0	3	2	2	0	22
d__Bacteria	k__norank_d__Bacteria	p__Actinobacteriota	c__Actinobacteria	o__Micromonosporales	f__Micromonosporaceae	g__norank_f__Micromonosporaceae	s__uncultured_bacterium_g__norank_f__Micromonosporaceae	OTU1054	0	0	0	0	0	0	0	0	0	40	40
d__Bacteria	k__norank_d__Bacteria	p__Patescibacteria	c__CPR2	o__norank_c__CPR2	f__norank_o__norank_c__CPR2	g__norank_f__norank_o__norank_c__CPR2	s__uncultured_microorganism_g__norank_f__norank_o__norank_c__CPR2	OTU984	0	0	0	0	0	0	0	0	0	1	1
d__Bacteria	k__norank_d__Bacteria	p__Firmicutes	c__Bacilli	o__Entomoplasmatales	f__Entomoplasmatales_Incertae_Sedis	g__Candidatus_Hepatoplasma	s__uncultured_bacterium_g__Candidatus_Hepatoplasma	OTU919	21995	3067	18317	195	39237	1339	41	79	0	777	85047
d__Bacteria	k__norank_d__Bacteria	p__unclassified_k__norank_d__Bacteria	c__unclassified_k__norank_d__Bacteria	o__unclassified_k__norank_d__Bacteria	f__unclassified_k__norank_d__Bacteria	g__unclassified_k__norank_d__Bacteria	s__unclassified_k__norank_d__Bacteria	OTU1040	0	0	0	0	0	0	0	1	0	0	1
d__Bacteria	k__norank_d__Bacteria	p__Firmicutes	c__Clostridia	o__Peptostreptococcales-Tissierellales	f__Fusibacteraceae	g__Fusibacter	s__unclassified_g__Fusibacter	OTU1112	0	1	0	0	0	0	0	0	0	0	1
d__Bacteria	k__norank_d__Bacteria	p__Actinobacteriota	c__Acidimicrobiia	o__Microtrichales	f__norank_o__Microtrichales	g__norank_f__norank_o__Microtrichales	s__wastewater_metagenome_g__norank_f__norank_o__Microtrichales	OTU170	0	2	0	0	0	2	0	0	0	4	8
d__Bacteria	k__norank_d__Bacteria	p__Firmicutes	c__Bacilli	o__Lactobacillales	f__Lactobacillaceae	g__Lactobacillus	s__Lactobacillus_johnsonii	OTU211	0	1	0	0	0	0	1	0	0	0	2
d__Bacteria	k__norank_d__Bacteria	p__Bacteroidota	c__SJA-28	o__norank_c__SJA-28	f__norank_o__norank_c__SJA-28	g__norank_f__norank_o__norank_c__SJA-28	s__unclassified_g__norank_f__norank_o__norank_c__SJA-28	OTU751	0	1	0	0	0	0	0	0	0	0	1
d__Bacteria	k__norank_d__Bacteria	p__Actinobacteriota	c__Coriobacteriia	o__OPB41	f__norank_o__OPB41	g__norank_f__norank_o__OPB41	s__uncultured_bacterium_g__norank_f__norank_o__OPB41	OTU69	0	0	0	1	0	1	0	3	0	3	8
d__Bacteria	k__norank_d__Bacteria	p__Acidobacteriota	c__Acidobacteriae	o__Subgroup_2	f__norank_o__Subgroup_2	g__norank_f__norank_o__Subgroup_2	s__unclassified_g__norank_f__norank_o__Subgroup_2	OTU401	1	3	0	0	1	0	0	0	0	1	6
d__Bacteria	k__norank_d__Bacteria	p__Patescibacteria	c__CPR2	o__norank_c__CPR2	f__norank_o__norank_c__CPR2	g__norank_f__norank_o__norank_c__CPR2	s__uncultured_bacterium_g__norank_f__norank_o__norank_c__CPR2	OTU1011	0	0	0	0	0	1	0	0	0	0	1
d__Bacteria	k__norank_d__Bacteria	p__Proteobacteria	c__Alphaproteobacteria	o__Rhodobacterales	f__Rhodobacteraceae	g__Tropicimonas	s__uncultured_bacterium_g__Tropicimonas	OTU877	0	3	0	1	0	7	0	3	0	13	27
d__Bacteria	k__norank_d__Bacteria	p__Chloroflexi	c__Anaerolineae	o__Caldilineales	f__Caldilineaceae	g__norank_f__Caldilineaceae	s__unclassified_g__norank_f__Caldilineaceae	OTU104	0	0	0	0	0	1	0	0	0	0	1
d__Bacteria	k__norank_d__Bacteria	p__Proteobacteria	c__Gammaproteobacteria	o__Burkholderiales	f__Comamonadaceae	g__unclassified_f__Comamonadaceae	s__unclassified_f__Comamonadaceae	OTU982	0	0	0	0	0	0	0	0	0	1	1
d__Bacteria	k__norank_d__Bacteria	p__Proteobacteria	c__Alphaproteobacteria	o__Rhodobacterales	f__Rhodobacteraceae	g__Rhodobacter	s__Rhodobacter_blasticus	OTU240	0	1	0	0	0	4	0	15	1	3	24
d__Bacteria	k__norank_d__Bacteria	p__Proteobacteria	c__Gammaproteobacteria	o__Xanthomonadales	f__Xanthomonadaceae	g__Stenotrophomonas	s__Flavobacterium_lutescens_g__Stenotrophomonas	OTU495	0	0	0	0	0	0	0	0	0	1	1
d__Bacteria	k__norank_d__Bacteria	p__Firmicutes	c__Bacilli	o__Bacillales	f__Sporolactobacillaceae	g__Sporolactobacillus	s__Sporolactobacillus_inulinus	OTU216	0	3	0	0	1	0	0	0	0	0	4
d__Bacteria	k__norank_d__Bacteria	p__Proteobacteria	c__Alphaproteobacteria	o__unclassified_c__Alphaproteobacteria	f__unclassified_c__Alphaproteobacteria	g__unclassified_c__Alphaproteobacteria	s__unclassified_c__Alphaproteobacteria	OTU1046	343	373	115	269	53	16	183	568	1067	423	3410
d__Bacteria	k__norank_d__Bacteria	p__Patescibacteria	c__Saccharimonadia	o__Saccharimonadales	f__norank_o__Saccharimonadales	g__norank_f__norank_o__Saccharimonadales	s__uncultured_organism_g__norank_f__norank_o__Saccharimonadales	OTU1139	0	0	0	1	0	0	0	0	0	0	1
d__Bacteria	k__norank_d__Bacteria	p__Patescibacteria	c__Saccharimonadia	o__Saccharimonadales	f__norank_o__Saccharimonadales	g__norank_f__norank_o__Saccharimonadales	s__unclassified_g__norank_f__norank_o__Saccharimonadales	OTU1159	0	0	0	0	0	0	0	0	0	3	3
d__Bacteria	k__norank_d__Bacteria	p__Cyanobacteria	c__Cyanobacteriia	o__Chloroplast	f__norank_o__Chloroplast	g__norank_f__norank_o__Chloroplast	s__Trachydiscus_minutus	OTU749	0	2	1	5	0	10	2	2	3	17	42
d__Bacteria	k__norank_d__Bacteria	p__Proteobacteria	c__Alphaproteobacteria	o__Rhizobiales	f__Rhizobiaceae	g__Allorhizobium-Neorhizobium-Pararhizobium-Rhizobium	s__unclassified_g__Allorhizobium-Neorhizobium-Pararhizobium-Rhizobium	OTU613	0	1	0	2	0	4	0	3	0	3	13
d__Bacteria	k__norank_d__Bacteria	p__Firmicutes	c__Clostridia	o__Lachnospirales	f__Lachnospiraceae	g__Tyzzerella	s__unclassified_g__Tyzzerella	OTU753	243	639	341	95	35	250	186	895	60	290	3034
d__Bacteria	k__norank_d__Bacteria	p__Firmicutes	c__Clostridia	o__Lachnospirales	f__Lachnospiraceae	g__unclassified_f__Lachnospiraceae	s__unclassified_f__Lachnospiraceae	OTU894	0	0	0	0	0	3	0	0	0	0	3
d__Bacteria	k__norank_d__Bacteria	p__Proteobacteria	c__Gammaproteobacteria	o__Steroidobacterales	f__Steroidobacteraceae	g__norank_f__Steroidobacteraceae	s__uncultured_gamma_proteobacterium_g__norank_f__Steroidobacteraceae	OTU933	0	13	0	1	1	15	0	1	1	4	36
d__Bacteria	k__norank_d__Bacteria	p__Actinobacteriota	c__Acidimicrobiia	o__IMCC26256	f__norank_o__IMCC26256	g__norank_f__norank_o__IMCC26256	s__unclassified_g__norank_f__norank_o__IMCC26256	OTU417	0	0	0	4	0	0	0	0	0	0	4
d__Bacteria	k__norank_d__Bacteria	p__Bacteroidota	c__Bacteroidia	o__Bacteroidales	f__Dysgonomonadaceae	g__Dysgonomonas	s__uncultured_bacterium_g__Dysgonomonas	OTU429	1029	1653	395	925	190	2091	135	4877	64	584	11943
d__Bacteria	k__norank_d__Bacteria	p__Firmicutes	c__Bacilli	o__Staphylococcales	f__Staphylococcaceae	g__Staphylococcus	s__Staphylococcus_saprophyticus_g__Staphylococcus	OTU676	0	1	0	0	0	0	0	0	0	0	1
d__Bacteria	k__norank_d__Bacteria	p__Proteobacteria	c__Gammaproteobacteria	o__Cellvibrionales	f__Halieaceae	g__unclassified_f__Halieaceae	s__unclassified_f__Halieaceae	OTU743	0	1	0	0	0	0	0	0	0	0	1
d__Bacteria	k__norank_d__Bacteria	p__Firmicutes	c__Bacilli	o__Mycoplasmatales	f__Mycoplasmataceae	g__norank_f__Mycoplasmataceae	s__uncultured_Firmicutes_bacterium_g__norank_f__Mycoplasmataceae	OTU30	5	0	0	0	0	0	0	0	10	0	15
d__Bacteria	k__norank_d__Bacteria	p__Actinobacteriota	c__Actinobacteria	o__Micrococcales	f__Demequinaceae	g__Demequina	s__uncultured_bacterium_g__Demequina	OTU837	0	2	0	0	0	0	0	3	0	1	6
d__Bacteria	k__norank_d__Bacteria	p__Firmicutes	c__Bacilli	o__Mycoplasmatales	f__Mycoplasmataceae	g__Candidatus_Bacilloplasma	s__uncultured_bacterium_g__Candidatus_Bacilloplasma	OTU542	0	0	0	0	0	0	0	0	1	0	1
d__Bacteria	k__norank_d__Bacteria	p__Firmicutes	c__Bacilli	o__Mycoplasmatales	f__Mycoplasmataceae	g__Candidatus_Bacilloplasma	s__uncultured_bacterium_g__Candidatus_Bacilloplasma	OTU546	27	12	525	93	1	20	2	78	1	140	899
d__Bacteria	k__norank_d__Bacteria	p__Actinobacteriota	c__Acidimicrobiia	o__Microtrichales	f__Ilumatobacteraceae	g__CL500-29_marine_group	s__uncultured_bacterium_g__CL500-29_marine_group	OTU118	0	1	0	0	0	0	0	0	0	0	1
d__Bacteria	k__norank_d__Bacteria	p__Patescibacteria	c__WWE3	o__norank_c__WWE3	f__norank_o__norank_c__WWE3	g__norank_f__norank_o__norank_c__WWE3	s__unclassified_g__norank_f__norank_o__norank_c__WWE3	OTU1075	0	0	0	0	0	0	0	1	0	0	1
d__Bacteria	k__norank_d__Bacteria	p__Firmicutes	c__Clostridia	o__Lachnospirales	f__Lachnospiraceae	g__Tyzzerella	s__unclassified_g__Tyzzerella	OTU1028	28	1	88	5	0	286	0	303	0	1	712
d__Bacteria	k__norank_d__Bacteria	p__Firmicutes	c__Bacilli	o__Lactobacillales	f__Enterococcaceae	g__Enterococcus	s__unclassified_g__Enterococcus	OTU1034	0	0	0	0	0	0	0	1	0	0	1
d__Bacteria	k__norank_d__Bacteria	p__Proteobacteria	c__Alphaproteobacteria	o__Rickettsiales	f__norank_o__Rickettsiales	g__norank_f__norank_o__Rickettsiales	s__uncultured_bacterium_g__norank_f__norank_o__Rickettsiales	OTU321	7	3	0	0	33	0	3	0	0	0	46
d__Bacteria	k__norank_d__Bacteria	p__Actinobacteriota	c__Acidimicrobiia	o__Microtrichales	f__unclassified_o__Microtrichales	g__unclassified_o__Microtrichales	s__unclassified_o__Microtrichales	OTU1025	0	0	0	0	0	1	0	1	0	0	2
d__Bacteria	k__norank_d__Bacteria	p__Bacteroidota	c__Bacteroidia	o__Chitinophagales	f__Chitinophagaceae	g__Taibaiella	s__Taibaiella_sp.	OTU1032	0	0	1	0	3	0	0	10	0	0	14
d__Bacteria	k__norank_d__Bacteria	p__Proteobacteria	c__Gammaproteobacteria	o__Burkholderiales	f__Hydrogenophilaceae	g__Thiobacillus	s__uncultured_Thiobacillus_sp._g__Thiobacillus	OTU1013	0	0	0	0	0	0	0	0	0	1	1
d__Bacteria	k__norank_d__Bacteria	p__Chloroflexi	c__Anaerolineae	o__Anaerolineales	f__Anaerolineaceae	g__norank_f__Anaerolineaceae	s__uncultured_prokaryote_g__norank_f__Anaerolineaceae	OTU1102	0	0	0	0	0	1	0	0	0	0	1
d__Bacteria	k__norank_d__Bacteria	p__Proteobacteria	c__Alphaproteobacteria	o__Azospirillales	f__norank_o__Azospirillales	g__norank_f__norank_o__Azospirillales	s__uncultured_bacterium_g__norank_f__norank_o__Azospirillales	OTU1048	0	0	0	0	0	0	0	0	3	0	3
d__Bacteria	k__norank_d__Bacteria	p__Bacteroidota	c__Bacteroidia	o__Bacteroidales	f__Muribaculaceae	g__norank_f__Muribaculaceae	s__uncultured_bacterium_g__norank_f__Muribaculaceae	OTU191	0	1	0	1	0	0	0	0	0	0	2
d__Bacteria	k__norank_d__Bacteria	p__Chloroflexi	c__Anaerolineae	o__1-20	f__norank_o__1-20	g__norank_f__norank_o__1-20	s__uncultured_bacterium_g__norank_f__norank_o__1-20	OTU86	0	0	0	0	0	1	0	1	0	0	2
d__Bacteria	k__norank_d__Bacteria	p__Proteobacteria	c__Gammaproteobacteria	o__Xanthomonadales	f__Xanthomonadaceae	g__Stenotrophomonas	s__Pseudomonas_geniculata_g__Stenotrophomonas	OTU458	0	0	0	0	0	0	0	0	0	1	1
d__Bacteria	k__norank_d__Bacteria	p__Proteobacteria	c__Gammaproteobacteria	o__Burkholderiales	f__Burkholderiaceae	g__Ralstonia	s__Ralstonia_pickettii	OTU742	0	0	0	0	0	0	0	0	0	2	2
d__Bacteria	k__norank_d__Bacteria	p__Verrucomicrobiota	c__Chlamydiae	o__Chlamydiales	f__unclassified_o__Chlamydiales	g__unclassified_o__Chlamydiales	s__unclassified_o__Chlamydiales	OTU873	0	0	0	0	0	1	0	0	0	0	1
d__Bacteria	k__norank_d__Bacteria	p__Proteobacteria	c__Alphaproteobacteria	o__Rhizobiales	f__Hyphomicrobiaceae	g__Hyphomicrobium	s__metagenome_g__Hyphomicrobium	OTU856	0	3	0	0	0	3	0	5	0	4	15
d__Bacteria	k__norank_d__Bacteria	p__Bacteroidota	c__Bacteroidia	o__Chitinophagales	f__Chitinophagaceae	g__Aurantisolimonas	s__uncultured_bacterium_g__Aurantisolimonas	OTU526	0	2	0	0	0	0	0	0	0	1	3
d__Bacteria	k__norank_d__Bacteria	p__Patescibacteria	c__Saccharimonadia	o__Saccharimonadales	f__norank_o__Saccharimonadales	g__norank_f__norank_o__Saccharimonadales	s__unclassified_g__norank_f__norank_o__Saccharimonadales	OTU413	0	0	0	5	0	0	0	0	0	0	5
d__Bacteria	k__norank_d__Bacteria	p__Proteobacteria	c__Alphaproteobacteria	o__Rhizobiales	f__unclassified_o__Rhizobiales	g__unclassified_o__Rhizobiales	s__unclassified_o__Rhizobiales	OTU74	0	0	0	0	0	0	1	2	0	1	4
d__Bacteria	k__norank_d__Bacteria	p__Bacteroidota	c__Bacteroidia	o__Chitinophagales	f__Saprospiraceae	g__norank_f__Saprospiraceae	s__unclassified_g__norank_f__Saprospiraceae	OTU799	0	0	0	0	0	0	0	1	0	0	1
d__Bacteria	k__norank_d__Bacteria	p__Proteobacteria	c__Gammaproteobacteria	o__Steroidobacterales	f__Steroidobacteraceae	g__norank_f__Steroidobacteraceae	s__unclassified_g__norank_f__Steroidobacteraceae	OTU994	0	0	0	0	0	1	0	0	0	0	1
d__Bacteria	k__norank_d__Bacteria	p__Firmicutes	c__Clostridia	o__Lachnospirales	f__Lachnospiraceae	g__Tyzzerella	s__unclassified_g__Tyzzerella	OTU835	228	5523	1453	121	103	4276	128	1766	14	2560	16172
d__Bacteria	k__norank_d__Bacteria	p__Actinobacteriota	c__Thermoleophilia	o__Gaiellales	f__norank_o__Gaiellales	g__norank_f__norank_o__Gaiellales	s__uncultured_Rubrobacteraceae_bacterium_g__norank	OTU246	0	1	0	0	0	2	0	2	1	0	6
d__Bacteria	k__norank_d__Bacteria	p__Bacteroidota	c__Bacteroidia	o__Bacteroidales	f__Dysgonomonadaceae	g__Dysgonomonas	s__uncultured_bacterium_g__Dysgonomonas	OTU843	0	0	0	0	0	0	0	3	0	0	3
d__Bacteria	k__norank_d__Bacteria	p__Chloroflexi	c__Anaerolineae	o__Anaerolineales	f__Anaerolineaceae	g__norank_f__Anaerolineaceae	s__uncultured_Anaerolineaceae_bacterium_g__norank_f__Anaerolineaceae	OTU782	0	0	0	3	0	3	0	0	1	0	7
d__Bacteria	k__norank_d__Bacteria	p__Proteobacteria	c__Alphaproteobacteria	o__Rhodobacterales	f__Rhodobacteraceae	g__unclassified_f__Rhodobacteraceae	s__unclassified_f__Rhodobacteraceae	OTU435	0	1	1	7	0	0	0	5	0	0	14
d__Bacteria	k__norank_d__Bacteria	p__Firmicutes	c__Clostridia	o__Clostridiales	f__Clostridiaceae	g__Clostridium_sensu_stricto_11	s__Clostridium_sp._DY2632	OTU1140	0	0	0	0	0	0	0	1	0	0	1
