# Supplementary material for: Effects of Dietary L-TRP on Immunity, Antioxidant Capacity and Intestinal Microbiota of the Chinese Mitten Crab (Eriocheir Sinensis) in Pond Culture
Source: Metabolites. 2022 Dec 20;13(1):1. doi: 10.3390/metabo13010001 (PMC9866439; doi:10.3390/metabo13010001)
Supplement: Supplementary file 1 [file metabolites-13-00001-s001.zip › Table S2-OTU species classification statistics in Sep..csv]

Domain	Kingdom	Phylum	Class	Order	Family	Genus	Species	OTU	C6_September	C2_September	C3_September	C4_September	C5_September	L2_September	L3_September	L4_September	L5_September	L6_September	SUM
d__Bacteria	k__norank_d__Bacteria	p__Bacteroidota	c__Bacteroidia	o__Flavobacteriales	f__Flavobacteriaceae	g__Flavobacterium	s__Flavobacterium_sasangense	OTU582	0	0	0	0	0	0	0	0	0	1	1
d__Bacteria	k__norank_d__Bacteria	p__Verrucomicrobiota	c__Chlamydiae	o__Chlamydiales	f__unclassified_o__Chlamydiales	g__unclassified_o__Chlamydiales	s__unclassified_o__Chlamydiales	OTU907	0	0	0	1	0	0	2	0	0	1	4
d__Bacteria	k__norank_d__Bacteria	p__Chloroflexi	c__Anaerolineae	o__SJA-15	f__norank_o__SJA-15	g__norank_f__norank_o__SJA-15	s__uncultured_bacterium_g__norank_f__norank_o__SJA-15	OTU61	2	0	0	1	1	0	0	0	0	1	5
d__Bacteria	k__norank_d__Bacteria	p__Patescibacteria	c__Saccharimonadia	o__Saccharimonadales	f__norank_o__Saccharimonadales	g__norank_f__norank_o__Saccharimonadales	s__uncultured_bacterium_SBR2060	OTU267	0	0	1	0	1	0	1	0	0	1	4
d__Bacteria	k__norank_d__Bacteria	p__Firmicutes	c__Bacilli	o__Mycoplasmatales	f__Mycoplasmataceae	g__norank_f__Mycoplasmataceae	s__uncultured_Firmicutes_bacterium_g__norank_f__Mycoplasmataceae	OTU971	291	106	93	1552	123	170	49	1053	12	0	3449
d__Bacteria	k__norank_d__Bacteria	p__Firmicutes	c__Clostridia	o__Clostridiales	f__Clostridiaceae	g__unclassified_f__Clostridiaceae	s__unclassified_f__Clostridiaceae	OTU966	0	0	0	2	0	0	0	1	0	0	3
d__Bacteria	k__norank_d__Bacteria	p__Firmicutes	c__Bacilli	o__Mycoplasmatales	f__Mycoplasmataceae	g__norank_f__Mycoplasmataceae	s__uncultured_Firmicutes_bacterium_g__norank_f__Mycoplasmataceae	OTU972	19	22	186	82	50	21	7	32	121	4	544
d__Bacteria	k__norank_d__Bacteria	p__Firmicutes	c__Bacilli	o__Bacillales	f__Bacillaceae	g__Halobacillus	s__unclassified_g__Halobacillus	OTU123	0	0	0	1	0	0	0	1	0	1	3
d__Bacteria	k__norank_d__Bacteria	p__Patescibacteria	c__CPR2	o__norank_c__CPR2	f__norank_o__norank_c__CPR2	g__norank_f__norank_o__norank_c__CPR2	s__uncultured_bacterium_g__norank_f__norank_o__norank_c__CPR2	OTU988	1	1	2	2	0	0	0	1	0	0	7
d__Bacteria	k__norank_d__Bacteria	p__Chloroflexi	c__KD4-96	o__norank_c__KD4-96	f__norank_o__norank_c__KD4-96	g__norank_f__norank_o__norank_c__KD4-96	s__uncultured_bacterium_g__norank_f__norank_o__norank_c__KD4-96	OTU73	2	0	0	1	0	0	0	1	0	0	4
d__Bacteria	k__norank_d__Bacteria	p__Chloroflexi	c__Chloroflexia	o__Thermomicrobiales	f__JG30-KF-CM45	g__norank_f__JG30-KF-CM45	s__metagenome_g__norank_f__JG30-KF-CM45	OTU428	0	1	1	0	0	0	0	0	0	0	2
d__Bacteria	k__norank_d__Bacteria	p__Bacteroidota	c__Bacteroidia	o__Chitinophagales	f__norank_o__Chitinophagales	g__norank_f__norank_o__Chitinophagales	s__uncultured_Cytophagales_bacterium_g__norank_f__norank	OTU39	0	0	0	1	1	0	0	0	1	0	3
d__Bacteria	k__norank_d__Bacteria	p__Proteobacteria	c__Alphaproteobacteria	o__Acetobacterales	f__Acetobacteraceae	g__Rhodovastum	s__uncultured_bacterium_g__Rhodovastum	OTU342	0	1	0	0	0	0	0	0	0	0	1
d__Bacteria	k__norank_d__Bacteria	p__Chloroflexi	c__Anaerolineae	o__Anaerolineales	f__Anaerolineaceae	g__norank_f__Anaerolineaceae	s__unclassified_g__norank_f__Anaerolineaceae	OTU1121	3	0	0	0	0	0	0	1	0	0	4
d__Bacteria	k__norank_d__Bacteria	p__Actinobacteriota	c__Actinobacteria	o__Corynebacteriales	f__Corynebacteriaceae	g__Corynebacterium	s__unclassified_g__Corynebacterium	OTU494	0	0	14	0	0	0	0	0	0	0	14
d__Bacteria	k__norank_d__Bacteria	p__Firmicutes	c__Bacilli	o__Mycoplasmatales	f__Mycoplasmataceae	g__norank_f__Mycoplasmataceae	s__uncultured_bacterium_g__norank_f__Mycoplasmataceae	OTU454	25	7	16	0	0	0	32	0	461	1	542
d__Bacteria	k__norank_d__Bacteria	p__Actinobacteriota	c__RBG-16-55-12	o__norank_c__RBG-16-55-12	f__norank_o__norank_c__RBG-16-55-12	g__norank_f__norank_o__norank_c__RBG-16-55-12	s__uncultured_bacterium_g__norank_f__norank_o__norank_c__RBG-16-55-12	OTU1047	0	0	0	0	0	0	0	0	0	1	1
d__Bacteria	k__norank_d__Bacteria	p__Firmicutes	c__Clostridia	o__Clostridiales	f__Clostridiaceae	g__Clostridium_sensu_stricto_11	s__Clostridium_acetobutylicum_ATCC_824	OTU1031	0	0	1	0	1	0	0	0	0	0	2
d__Bacteria	k__norank_d__Bacteria	p__Actinobacteriota	c__Actinobacteria	o__Kineosporiales	f__Kineosporiaceae	g__unclassified_f__Kineosporiaceae	s__unclassified_f__Kineosporiaceae	OTU85	0	0	1	4	2	0	0	2	0	0	9
d__Bacteria	k__norank_d__Bacteria	p__Chloroflexi	c__Anaerolineae	o__1-20	f__norank_o__1-20	g__norank_f__norank_o__1-20	s__unclassified_g__norank_f__norank_o__1-20	OTU878	0	0	0	2	0	0	0	0	0	0	2
d__Bacteria	k__norank_d__Bacteria	p__Firmicutes	c__Bacilli	o__Staphylococcales	f__Staphylococcaceae	g__Staphylococcus	s__Staphylococcus_sciuri	OTU694	0	0	22	4	1	0	0	0	1	0	28
d__Bacteria	k__norank_d__Bacteria	p__Proteobacteria	c__Alphaproteobacteria	o__Rhizobiales	f__Rhizobiaceae	g__unclassified_f__Rhizobiaceae	s__unclassified_f__Rhizobiaceae	OTU673	0	0	7	0	0	0	0	0	0	0	7
d__Bacteria	k__norank_d__Bacteria	p__Patescibacteria	c__Saccharimonadia	o__Saccharimonadales	f__norank_o__Saccharimonadales	g__norank_f__norank_o__Saccharimonadales	s__unclassified_g__norank_f__norank_o__Saccharimonadales	OTU725	0	0	0	0	0	0	1	0	0	4	5
d__Bacteria	k__norank_d__Bacteria	p__Firmicutes	c__Clostridia	o__Peptostreptococcales-Tissierellales	f__Anaerovoracaceae	g__Eubacterium_brachy_group	s__uncultured_bacterium_g__Eubacterium_brachy_group	OTU803	0	0	4	1	0	0	0	0	0	0	5
d__Bacteria	k__norank_d__Bacteria	p__Desulfobacterota	c__norank_p__Desulfobacterota	o__norank_c__norank_p__Desulfobacterota	f__norank_o__norank_c__norank_p__Desulfobacterota	g__norank_f__norank_o__norank_c__norank_p__Desulfobacterota	s__uncultured_Desulfuromonadales_bacterium_g__norank_f__norank_o__norank_c__norank_p__Desulfobacterota	OTU833	0	0	0	0	0	0	0	1	0	0	1
d__Bacteria	k__norank_d__Bacteria	p__Actinobacteriota	c__Thermoleophilia	o__Solirubrobacterales	f__Solirubrobacteraceae	g__norank_f__Solirubrobacteraceae	s__soil_metagenome_g__norank_f__Solirubrobacteraceae	OTU214	0	1	1	0	0	0	0	0	0	0	2
d__Bacteria	k__norank_d__Bacteria	p__Fusobacteriota	c__Fusobacteriia	o__Fusobacteriales	f__Fusobacteriaceae	g__Cetobacterium	s__uncultured_bacterium_g__Cetobacterium	OTU294	0	0	0	1	0	0	0	1	1	1	4
d__Bacteria	k__norank_d__Bacteria	p__Acidobacteriota	c__Vicinamibacteria	o__Vicinamibacterales	f__Vicinamibacteraceae	g__norank_f__Vicinamibacteraceae	s__unclassified_g__norank_f__Vicinamibacteraceae	OTU244	0	0	0	0	0	0	0	1	0	0	1
d__Bacteria	k__norank_d__Bacteria	p__Bacteroidota	c__Bacteroidia	o__Chitinophagales	f__Chitinophagaceae	g__unclassified_f__Chitinophagaceae	s__unclassified_f__Chitinophagaceae	OTU433	0	7	0	0	1	0	1	0	0	0	9
d__Bacteria	k__norank_d__Bacteria	p__Bacteroidota	c__Bacteroidia	o__Chitinophagales	f__Chitinophagaceae	g__unclassified_f__Chitinophagaceae	s__unclassified_f__Chitinophagaceae	OTU430	3	34	1	23	1	1	0	1	0	0	64
d__Bacteria	k__norank_d__Bacteria	p__Cyanobacteria	c__Vampirivibrionia	o__Gastranaerophilales	f__norank_o__Gastranaerophilales	g__norank_f__norank_o__Gastranaerophilales	s__uncultured_organism_g__norank_f__norank_o__Gastranaerophilales	OTU543	0	0	0	2	0	0	0	0	0	0	2
d__Bacteria	k__norank_d__Bacteria	p__Actinobacteriota	c__WCHB1-81	o__norank_c__WCHB1-81	f__norank_o__norank_c__WCHB1-81	g__norank_f__norank_o__norank_c__WCHB1-81	s__uncultured_bacterium_g__norank_f__norank_o__norank_c__WCHB1-81	OTU533	0	0	0	1	0	0	0	0	0	0	1
d__Bacteria	k__norank_d__Bacteria	p__Chloroflexi	c__KD4-96	o__norank_c__KD4-96	f__norank_o__norank_c__KD4-96	g__norank_f__norank_o__norank_c__KD4-96	s__metagenome_g__norank_f__norank_o__norank_c__KD4-96	OTU49	1	0	0	4	0	0	0	1	0	1	7
d__Bacteria	k__norank_d__Bacteria	p__Bacteroidota	c__Bacteroidia	o__Bacteroidales	f__Prolixibacteraceae	g__Roseimarinus	s__uncultured_bacterium_g__Roseimarinus	OTU1168	736	105	2170	21	3345	221	2	1639	305	624	9168
d__Bacteria	k__norank_d__Bacteria	p__Bacteroidota	c__Bacteroidia	o__Bacteroidales	f__Dysgonomonadaceae	g__Dysgonomonas	s__uncultured_bacterium_g__Dysgonomonas	OTU843	9	2	2	0	2	11	9	2	5	0	42
d__Bacteria	k__norank_d__Bacteria	p__Proteobacteria	c__Gammaproteobacteria	o__Methylococcales	f__Methylococcaceae	g__unclassified_f__Methylococcaceae	s__unclassified_f__Methylococcaceae	OTU1059	0	0	0	0	0	0	0	0	1	1	2
d__Bacteria	k__norank_d__Bacteria	p__Desulfobacterota	c__Syntrophobacteria	o__Syntrophobacterales	f__Syntrophobacteraceae	g__Syntrophobacter	s__uncultured_bacterium_g__Syntrophobacter	OTU60	2	0	0	1	0	0	0	0	0	0	3
d__Bacteria	k__norank_d__Bacteria	p__Firmicutes	c__Bacilli	o__Lactobacillales	f__Streptococcaceae	g__Lactovum	s__uncultured_bacterium_g__Lactovum	OTU367	364	84	436	113	34	43	50	177	66	36	1403
d__Bacteria	k__norank_d__Bacteria	p__Actinobacteriota	c__Thermoleophilia	o__Gaiellales	f__Gaiellaceae	g__Gaiella	s__metagenome_g__Gaiella	OTU483	1	0	1	0	0	0	0	0	0	0	2
d__Bacteria	k__norank_d__Bacteria	p__Patescibacteria	c__Saccharimonadia	o__Saccharimonadales	f__norank_o__Saccharimonadales	g__norank_f__norank_o__Saccharimonadales	s__uncultured_bacterium_g__norank_f__norank_o__Saccharimonadales	OTU1115	0	5	14	72	6	0	4	2	1	0	104
d__Bacteria	k__norank_d__Bacteria	p__Proteobacteria	c__Alphaproteobacteria	o__Elsterales	f__norank_o__Elsterales	g__norank_f__norank_o__Elsterales	s__uncultured_bacterium_g__norank_f__norank_o__Elsterales	OTU426	0	2	0	2	0	0	0	0	0	0	4
d__Bacteria	k__norank_d__Bacteria	p__Proteobacteria	c__Alphaproteobacteria	o__Rickettsiales	f__Rickettsiaceae	g__Candidatus_Megaira	s__uncultured_bacterium_g__Candidatus_Megaira	OTU268	0	0	0	0	0	0	0	0	0	4	4
d__Bacteria	k__norank_d__Bacteria	p__Cyanobacteria	c__Cyanobacteriia	o__Chloroplast	f__norank_o__Chloroplast	g__norank_f__norank_o__Chloroplast	s__Oscillatoriales_cyanobacterium_HF1	OTU876	0	0	1	0	0	0	0	0	0	0	1
d__Bacteria	k__norank_d__Bacteria	p__Proteobacteria	c__Alphaproteobacteria	o__Rhizobiales	f__Rhizobiales_Incertae_Sedis	g__norank_f__Rhizobiales_Incertae_Sedis	s__metagenome_g__norank_f__Rhizobiales_Incertae_Sedis	OTU437	13	19	40	96	22	1	3	5	12	5	216
d__Bacteria	k__norank_d__Bacteria	p__Firmicutes	c__Clostridia	o__Lachnospirales	f__Lachnospiraceae	g__Tyzzerella	s__uncultured_bacterium_g__Tyzzerella	OTU949	19	18	292	7	138	15	1	13	1	292	796
d__Bacteria	k__norank_d__Bacteria	p__Patescibacteria	c__Saccharimonadia	o__Saccharimonadales	f__norank_o__Saccharimonadales	g__norank_f__norank_o__Saccharimonadales	s__unclassified_g__norank_f__norank_o__Saccharimonadales	OTU529	0	0	0	5	0	0	0	1	0	0	6
d__Bacteria	k__norank_d__Bacteria	p__Bacteroidota	c__Bacteroidia	o__Flavobacteriales	f__unclassified_o__Flavobacteriales	g__unclassified_o__Flavobacteriales	s__unclassified_o__Flavobacteriales	OTU427	1	65	8	68	11	0	1	10	7	0	171
d__Bacteria	k__norank_d__Bacteria	p__Firmicutes	c__Bacilli	o__Erysipelotrichales	f__Erysipelotrichaceae	g__ZOR0006	s__uncultured_bacterium_g__ZOR0006	OTU1171	0	0	0	0	0	0	0	0	0	1	1
d__Bacteria	k__norank_d__Bacteria	p__Proteobacteria	c__Alphaproteobacteria	o__Rhizobiales	f__Rhizobiaceae	g__Paenochrobactrum	s__uncultured_bacterium_g__Paenochrobactrum	OTU490	0	0	5	0	0	0	0	0	0	0	5
d__Bacteria	k__norank_d__Bacteria	p__Patescibacteria	c__Saccharimonadia	o__Saccharimonadales	f__norank_o__Saccharimonadales	g__norank_f__norank_o__Saccharimonadales	s__uncultured_bacterium_g__norank_f__norank_o__Saccharimonadales	OTU530	0	0	0	1	0	0	0	0	0	0	1
d__Bacteria	k__norank_d__Bacteria	p__Bacteroidota	c__Bacteroidia	o__Bacteroidales	f__Bacteroidaceae	g__Bacteroides	s__unclassified_g__Bacteroides	OTU1051	411	119	7	39	124	96	21	1	784	770	2372
d__Bacteria	k__norank_d__Bacteria	p__Patescibacteria	c__Microgenomatia	o__Candidatus_Pacebacteria	f__norank_o__Candidatus_Pacebacteria	g__norank_f__norank_o__Candidatus_Pacebacteria	s__uncultured_anaerobic_bacterium_g__norank_f__norank_o__Candidatus_Pacebacteria	OTU854	0	0	0	0	0	0	0	0	0	1	1
d__Bacteria	k__norank_d__Bacteria	p__Bacteroidota	c__Bacteroidia	o__Chitinophagales	f__Chitinophagaceae	g__Dinghuibacter	s__uncultured_Bacteroidetes_bacterium_g__Dinghuibacter	OTU519	0	0	1	1	0	0	0	0	0	1	3
d__Bacteria	k__norank_d__Bacteria	p__Cyanobacteria	c__Cyanobacteriia	o__Chloroplast	f__norank_o__Chloroplast	g__norank_f__norank_o__Chloroplast	s__unclassified_g__norank_f__norank_o__Chloroplast	OTU1150	0	2	0	8	0	0	0	0	0	0	10
d__Bacteria	k__norank_d__Bacteria	p__Patescibacteria	c__Saccharimonadia	o__Saccharimonadales	f__norank_o__Saccharimonadales	g__norank_f__norank_o__Saccharimonadales	s__uncultured_bacterium_g__norank_f__norank_o__Saccharimonadales	OTU812	80	36	0	172	630	44	190	455	2	11	1620
d__Bacteria	k__norank_d__Bacteria	p__Firmicutes	c__Limnochordia	o__norank_c__Limnochordia	f__norank_o__norank_c__Limnochordia	g__Hydrogenispora	s__uncultured_bacterium_g__Hydrogenispora	OTU772	0	0	0	1	0	0	0	0	0	1	2
d__Bacteria	k__norank_d__Bacteria	p__Proteobacteria	c__Alphaproteobacteria	o__Rhizobiales	f__Rhizobiaceae	g__Allorhizobium-Neorhizobium-Pararhizobium-Rhizobium	s__unclassified_g__Allorhizobium-Neorhizobium-Pararhizobium-Rhizobium	OTU695	0	0	7	0	0	0	0	0	0	1	8
d__Bacteria	k__norank_d__Bacteria	p__Actinobacteriota	c__Actinobacteria	o__Propionibacteriales	f__Nocardioidaceae	g__Nocardioides	s__unclassified_g__Nocardioides	OTU839	0	0	4	1	0	0	0	0	0	1	6
d__Bacteria	k__norank_d__Bacteria	p__Proteobacteria	c__Gammaproteobacteria	o__Enterobacterales	f__Budviciaceae	g__Pragia	s__bacterium_TSA241-4	OTU1056	3	3	1	0	5	0	1	3	2	0	18
d__Bacteria	k__norank_d__Bacteria	p__Bacteroidota	c__Bacteroidia	o__Sphingobacteriales	f__Sphingobacteriaceae	g__Sphingobacterium	s__Sphingobacterium_hotanense	OTU461	0	0	4	0	0	0	0	0	0	0	4
d__Bacteria	k__norank_d__Bacteria	p__Firmicutes	c__Bacilli	o__Lactobacillales	f__Lactobacillaceae	g__Lactobacillus	s__Lactobacillus_plantarum_g__Lactobacillus	OTU418	0	0	0	1	1	0	0	0	0	1	3
d__Bacteria	k__norank_d__Bacteria	p__Cyanobacteria	c__Cyanobacteriia	o__Chloroplast	f__norank_o__Chloroplast	g__norank_f__norank_o__Chloroplast	s__unclassified_g__norank_f__norank_o__Chloroplast	OTU238	1	0	1	1	0	0	0	0	0	0	3
d__Bacteria	k__norank_d__Bacteria	p__Firmicutes	c__Bacilli	o__Erysipelotrichales	f__Erysipelotrichaceae	g__ZOR0006	s__uncultured_bacterium_g__ZOR0006	OTU187	2692	4019	4725	1507	1041	730	455	1883	485	852	18389
d__Bacteria	k__norank_d__Bacteria	p__Chloroflexi	c__Anaerolineae	o__SBR1031	f__norank_o__SBR1031	g__norank_f__norank_o__SBR1031	s__unclassified_g__norank_f__norank_o__SBR1031	OTU788	0	0	0	1	0	0	0	0	0	0	1
d__Bacteria	k__norank_d__Bacteria	p__Planctomycetota	c__Planctomycetes	o__Gemmatales	f__Gemmataceae	g__norank_f__Gemmataceae	s__uncultured_prokaryote_g__norank_f__Gemmataceae	OTU469	0	0	4	7	2	0	1	0	1	1	16
d__Bacteria	k__norank_d__Bacteria	p__Proteobacteria	c__Gammaproteobacteria	o__Nitrosococcales	f__Nitrosococcaceae	g__CI75cm.2.12	s__uncultured_bacterium_g__CI75cm.2.12	OTU126	0	0	1	0	0	0	0	0	0	0	1
d__Bacteria	k__norank_d__Bacteria	p__Cyanobacteria	c__Cyanobacteriia	o__Chloroplast	f__norank_o__Chloroplast	g__norank_f__norank_o__Chloroplast	s__unclassified_g__norank_f__norank_o__Chloroplast	OTU54	1	0	0	0	0	0	0	0	0	0	1
d__Bacteria	k__norank_d__Bacteria	p__Proteobacteria	c__Gammaproteobacteria	o__Coxiellales	f__Coxiellaceae	g__Coxiella	s__uncultured_Coxiellaceae_bacterium_g__Coxiella	OTU248	0	0	0	0	0	0	0	0	0	1	1
d__Bacteria	k__norank_d__Bacteria	p__Patescibacteria	c__Saccharimonadia	o__Saccharimonadales	f__norank_o__Saccharimonadales	g__norank_f__norank_o__Saccharimonadales	s__uncultured_organism_g__norank_f__norank_o__Saccharimonadales	OTU524	0	3	3	27	5	0	1	0	1	0	40
d__Bacteria	k__norank_d__Bacteria	p__Actinobacteriota	c__Actinobacteria	o__Frankiales	f__norank_o__Frankiales	g__norank_f__norank_o__Frankiales	s__uncultured_bacterium_g__norank_f__norank_o__Frankiales	OTU380	0	0	0	0	0	0	0	0	0	1	1
d__Bacteria	k__norank_d__Bacteria	p__Proteobacteria	c__Gammaproteobacteria	o__Enterobacterales	f__Enterobacteriaceae	g__Citrobacter	s__Citrobacter_freundii_g__Citrobacter	OTU168	38	99	5	4	3	21	7	12	654	9	852
d__Bacteria	k__norank_d__Bacteria	p__Proteobacteria	c__Alphaproteobacteria	o__Sphingomonadales	f__Sphingomonadaceae	g__Sphingomonas	s__uncultured_Sphingomonadaceae_bacterium_g__Sphingomonas	OTU906	1	0	15	14	4	1	2	2	0	1	40
d__Bacteria	k__norank_d__Bacteria	p__Chloroflexi	c__Anaerolineae	o__norank_c__Anaerolineae	f__norank_o__norank_c__Anaerolineae	g__norank_f__norank_o__norank_c__Anaerolineae	s__uncultured_bacterium_g__norank_f__norank_o__norank_c__Anaerolineae	OTU785	1	0	1	4	0	0	0	1	1	4	12
d__Bacteria	k__norank_d__Bacteria	p__Firmicutes	c__Negativicutes	o__Veillonellales-Selenomonadales	f__Sporomusaceae	g__Anaerosinus	s__uncultured_bacterium_g__Anaerosinus	OTU862	0	0	1	0	0	0	0	0	0	0	1
d__Bacteria	k__norank_d__Bacteria	p__Bacteroidota	c__Bacteroidia	o__Flavobacteriales	f__Weeksellaceae	g__Empedobacter	s__uncultured_bacterium_g__Empedobacter	OTU462	0	1	4	0	0	0	0	0	0	0	5
d__Bacteria	k__norank_d__Bacteria	p__Firmicutes	c__Clostridia	o__Peptococcales	f__Peptococcaceae	g__norank_f__Peptococcaceae	s__unclassified_g__norank_f__Peptococcaceae	OTU227	0	0	1	0	0	0	0	0	0	0	1
d__Bacteria	k__norank_d__Bacteria	p__Firmicutes	c__Bacilli	o__Exiguobacterales	f__Exiguobacteraceae	g__Exiguobacterium	s__Exiguobacterium_indicum	OTU885	1	1	46	13	6	1	1	2	0	1	72
d__Bacteria	k__norank_d__Bacteria	p__Firmicutes	c__Clostridia	o__Christensenellales	f__Christensenellaceae	g__Christensenellaceae_R-7_group	s__Clostridium_sp._enrichment_culture_clone_VanCtr93	OTU811	0	0	0	0	0	0	0	0	0	1	1
d__Bacteria	k__norank_d__Bacteria	p__Bacteroidota	c__Bacteroidia	o__Cytophagales	f__Spirosomaceae	g__unclassified_f__Spirosomaceae	s__unclassified_f__Spirosomaceae	OTU204	0	0	4	7	1	0	1	0	0	0	13
d__Bacteria	k__norank_d__Bacteria	p__Verrucomicrobiota	c__Verrucomicrobiae	o__Verrucomicrobiales	f__Verrucomicrobiaceae	g__norank_f__Verrucomicrobiaceae	s__uncultured_soil_bacterium_g__norank_f__Verrucomicrobiaceae	OTU890	0	0	1	2	0	0	0	1	0	0	4
d__Bacteria	k__norank_d__Bacteria	p__Chloroflexi	c__Anaerolineae	o__SJA-15	f__norank_o__SJA-15	g__norank_f__norank_o__SJA-15	s__uncultured_soil_bacterium_g__norank_f__norank_o__SJA-15	OTU1116	2	0	0	2	1	0	0	0	0	0	5
d__Bacteria	k__norank_d__Bacteria	p__Patescibacteria	c__CPR2	o__norank_c__CPR2	f__norank_o__norank_c__CPR2	g__norank_f__norank_o__norank_c__CPR2	s__uncultured_bacterium_g__norank_f__norank_o__norank_c__CPR2	OTU1001	0	1	0	1	0	0	0	0	0	0	2
d__Bacteria	k__norank_d__Bacteria	p__Patescibacteria	c__Saccharimonadia	o__Saccharimonadales	f__norank_o__Saccharimonadales	g__norank_f__norank_o__Saccharimonadales	s__uncultured_candidate_division_WS5_bacterium	OTU787	0	0	1	2	0	0	0	0	0	1	4
d__Bacteria	k__norank_d__Bacteria	p__Proteobacteria	c__Alphaproteobacteria	o__Rhizobiales	f__Xanthobacteraceae	g__Ancylobacter	s__Ancylobacter_polymorphus	OTU588	0	0	1	0	1	0	0	0	0	0	2
d__Bacteria	k__norank_d__Bacteria	p__Patescibacteria	c__Saccharimonadia	o__Saccharimonadales	f__unclassified_o__Saccharimonadales	g__unclassified_o__Saccharimonadales	s__unclassified_o__Saccharimonadales	OTU590	0	0	1	1	1	0	0	0	0	0	3
d__Bacteria	k__norank_d__Bacteria	p__Chloroflexi	c__Anaerolineae	o__Anaerolineales	f__Anaerolineaceae	g__norank_f__Anaerolineaceae	s__uncultured_Chloroflexi_bacterium_g__norank_f__Anaerolineaceae	OTU821	0	0	1	0	0	0	0	0	0	0	1
d__Bacteria	k__norank_d__Bacteria	p__Patescibacteria	c__Saccharimonadia	o__Saccharimonadales	f__unclassified_o__Saccharimonadales	g__unclassified_o__Saccharimonadales	s__unclassified_o__Saccharimonadales	OTU1020	0	0	1	0	0	0	0	0	0	0	1
d__Bacteria	k__norank_d__Bacteria	p__Bacteroidota	c__Bacteroidia	o__Flavobacteriales	f__Weeksellaceae	g__Chryseobacterium	s__unclassified_g__Chryseobacterium	OTU1026	0	2	4	2	0	0	0	0	39	11	58
d__Bacteria	k__norank_d__Bacteria	p__Nitrospinota	c__P9X2b3D02	o__norank_c__P9X2b3D02	f__norank_o__norank_c__P9X2b3D02	g__norank_f__norank_o__norank_c__P9X2b3D02	s__uncultured_prokaryote_g__norank_f__norank_o__norank_c__P9X2b3D02	OTU81	0	0	1	0	1	0	0	0	0	0	2
d__Bacteria	k__norank_d__Bacteria	p__Proteobacteria	c__Alphaproteobacteria	o__Acetobacterales	f__Acetobacteraceae	g__Roseomonas	s__unclassified_g__Roseomonas	OTU76	0	0	0	0	0	0	0	0	1	0	1
d__Bacteria	k__norank_d__Bacteria	p__Proteobacteria	c__Alphaproteobacteria	o__Caulobacterales	f__Caulobacteraceae	g__Brevundimonas	s__Brevundimonas_vesicularis	OTU774	0	0	5	0	1	0	0	0	0	0	6
d__Bacteria	k__norank_d__Bacteria	p__Patescibacteria	c__Saccharimonadia	o__Saccharimonadales	f__norank_o__Saccharimonadales	g__norank_f__norank_o__Saccharimonadales	s__uncultured_bacterium_SBR2060	OTU425	0	8	1	24	0	0	0	0	0	0	33
d__Bacteria	k__norank_d__Bacteria	p__Firmicutes	c__Clostridia	o__Clostridiales	f__Clostridiaceae	g__Clostridium_sensu_stricto_1	s__unclassified_g__Clostridium_sensu_stricto_1	OTU1057	1	6	5	15	3	1	0	1	4	2	38
d__Bacteria	k__norank_d__Bacteria	p__Firmicutes	c__Clostridia	o__Clostridiales	f__Clostridiaceae	g__Clostridium_sensu_stricto_1	s__unclassified_g__Clostridium_sensu_stricto_1	OTU1055	1	3	13	17	2	0	1	1	2	4	44
d__Bacteria	k__norank_d__Bacteria	p__Proteobacteria	c__Gammaproteobacteria	o__Competibacterales	f__Competibacteraceae	g__Candidatus_Competibacter	s__uncultured_gamma_proteobacterium_g__Candidatus_Competibacter	OTU937	0	0	1	0	0	0	0	0	0	0	1
d__Bacteria	k__norank_d__Bacteria	p__Proteobacteria	c__Alphaproteobacteria	o__Rhizobiales	f__Hyphomicrobiaceae	g__Hyphomicrobium	s__unclassified_g__Hyphomicrobium	OTU70	0	0	0	2	1	0	0	0	0	0	3
d__Bacteria	k__norank_d__Bacteria	p__Actinobacteriota	c__Actinobacteria	o__Micrococcales	f__Microbacteriaceae	g__Microbacterium	s__Microbacterium_lacus	OTU702	0	0	3	3	0	0	1	2	0	0	9
d__Bacteria	k__norank_d__Bacteria	p__Firmicutes	c__Clostridia	o__Lachnospirales	f__Lachnospiraceae	g__Tyzzerella	s__unclassified_g__Tyzzerella	OTU845	68	70	1801	38	244	170	540	129	89	1118	4267
d__Bacteria	k__norank_d__Bacteria	p__Verrucomicrobiota	c__Verrucomicrobiae	o__Verrucomicrobiales	f__Verrucomicrobiaceae	g__norank_f__Verrucomicrobiaceae	s__uncultured_Verrucomicrobia_bacterium_g__norank_f__Verrucomicrobiaceae	OTU936	0	0	0	0	0	0	0	0	0	1	1
d__Bacteria	k__norank_d__Bacteria	p__Proteobacteria	c__Gammaproteobacteria	o__Steroidobacterales	f__Woeseiaceae	g__Woeseia	s__uncultured_bacterium_g__Woeseia	OTU129	0	0	0	0	0	0	0	0	0	2	2
d__Bacteria	k__norank_d__Bacteria	p__Actinobacteriota	c__Actinobacteria	o__Propionibacteriales	f__Nocardioidaceae	g__Nocardioides	s__unclassified_g__Nocardioides	OTU484	1	1	7	1	0	0	1	1	0	0	12
d__Bacteria	k__norank_d__Bacteria	p__Proteobacteria	c__Gammaproteobacteria	o__SZB30	f__norank_o__SZB30	g__norank_f__norank_o__SZB30	s__uncultured_bacterium_g__norank_f__norank_o__SZB30	OTU64	0	0	1	0	0	0	0	0	0	0	1
d__Bacteria	k__norank_d__Bacteria	p__Actinobacteriota	c__Acidimicrobiia	o__Microtrichales	f__Ilumatobacteraceae	g__CL500-29_marine_group	s__metagenome_g__CL500-29_marine_group	OTU15	0	0	0	1	0	0	0	0	0	0	1
d__Bacteria	k__norank_d__Bacteria	p__Proteobacteria	c__Alphaproteobacteria	o__Rhodobacterales	f__Rhodobacteraceae	g__Rhodobacter	s__Rhodobacter_blasticus	OTU240	2	0	7	4	5	2	1	5	0	4	30
d__Bacteria	k__norank_d__Bacteria	p__Actinobacteriota	c__Actinobacteria	o__Micrococcales	f__Microbacteriaceae	g__Candidatus_Aquiluna	s__uncultured_bacterium_g__Candidatus_Aquiluna	OTU25	0	0	1	1	0	0	0	0	0	0	2
d__Bacteria	k__norank_d__Bacteria	p__Bacteroidota	c__Bacteroidia	o__Bacteroidales	f__ML635J-40_aquatic_group	g__norank_f__ML635J-40_aquatic_group	s__uncultured_Sphingobacteriia_bacterium_g__norank_f__ML635J-40_aquatic_group	OTU364	0	0	0	0	0	0	0	0	0	1	1
d__Bacteria	k__norank_d__Bacteria	p__Actinobacteriota	c__Actinobacteria	o__Propionibacteriales	f__Propionibacteriaceae	g__unclassified_f__Propionibacteriaceae	s__unclassified_f__Propionibacteriaceae	OTU921	2	1	2	5	1	0	0	0	0	0	11
d__Bacteria	k__norank_d__Bacteria	p__Chloroflexi	c__Anaerolineae	o__1-20	f__norank_o__1-20	g__norank_f__norank_o__1-20	s__uncultured_Chloroflexia_bacterium_g__norank_f__norank	OTU525	0	0	2	1	0	0	0	0	0	2	5
d__Bacteria	k__norank_d__Bacteria	p__Patescibacteria	c__CPR2	o__norank_c__CPR2	f__norank_o__norank_c__CPR2	g__norank_f__norank_o__norank_c__CPR2	s__uncultured_Clostridium_sp._g__norank_f__norank_o__norank	OTU260	0	0	0	0	0	0	0	0	0	1	1
d__Bacteria	k__norank_d__Bacteria	p__Bacteroidota	c__Bacteroidia	o__Flavobacteriales	f__Weeksellaceae	g__unclassified_f__Weeksellaceae	s__unclassified_f__Weeksellaceae	OTU504	0	11	1	7	3	0	0	0	0	0	22
d__Bacteria	k__norank_d__Bacteria	p__Actinobacteriota	c__Acidimicrobiia	o__Microtrichales	f__Ilumatobacteraceae	g__CL500-29_marine_group	s__uncultured_bacterium_g__CL500-29_marine_group	OTU535	1	0	3	3	0	0	0	0	0	0	7
d__Bacteria	k__norank_d__Bacteria	p__Firmicutes	c__Bacilli	o__Staphylococcales	f__Staphylococcaceae	g__Jeotgalicoccus	s__Jeotgalicoccus_huakuii	OTU683	0	0	3	0	0	0	1	0	0	0	4
d__Bacteria	k__norank_d__Bacteria	p__Cyanobacteria	c__Cyanobacteriia	o__Cyanobacteriales	f__Phormidiaceae	g__Planktothrix_NIVA-CYA_15	s__Planktothrix_agardhii	OTU818	1	0	0	2	0	0	0	1	3	0	7
d__Bacteria	k__norank_d__Bacteria	p__Cyanobacteria	c__Cyanobacteriia	o__Chloroplast	f__norank_o__Chloroplast	g__norank_f__norank_o__Chloroplast	s__unclassified_g__norank_f__norank_o__Chloroplast	OTU724	0	0	1	0	0	0	0	0	0	0	1
d__Bacteria	k__norank_d__Bacteria	p__Bacteroidota	c__Bacteroidia	o__Chitinophagales	f__Saprospiraceae	g__norank_f__Saprospiraceae	s__unclassified_g__norank_f__Saprospiraceae	OTU799	0	0	0	0	1	2	0	0	0	0	3
d__Bacteria	k__norank_d__Bacteria	p__Proteobacteria	c__Gammaproteobacteria	o__Burkholderiales	f__Comamonadaceae	g__Delftia	s__Delftia_tsuruhatensis	OTU677	0	0	1	0	0	0	0	0	0	0	1
d__Bacteria	k__norank_d__Bacteria	p__Firmicutes	c__Bacilli	o__Entomoplasmatales	f__Entomoplasmatales_Incertae_Sedis	g__Candidatus_Hepatoplasma	s__uncultured_Entomoplasmatales_bacterium_g__Candidatus_Hepatoplasma	OTU180	1	0	0	0	0	0	5	4	0	0	10
d__Bacteria	k__norank_d__Bacteria	p__Nitrospinota	c__P9X2b3D02	o__norank_c__P9X2b3D02	f__norank_o__norank_c__P9X2b3D02	g__norank_f__norank_o__norank_c__P9X2b3D02	s__uncultured_prokaryote_g__norank_f__norank_o__norank_c__P9X2b3D02	OTU254	0	0	0	0	0	0	0	0	0	1	1
d__Bacteria	k__norank_d__Bacteria	p__Firmicutes	c__Clostridia	o__Peptostreptococcales-Tissierellales	f__Peptostreptococcaceae	g__Acetoanaerobium	s__uncultured_bacterium_g__Acetoanaerobium	OTU618	0	0	0	0	0	0	0	1	0	0	1
d__Bacteria	k__norank_d__Bacteria	p__Verrucomicrobiota	c__Verrucomicrobiae	o__Chthoniobacterales	f__Terrimicrobiaceae	g__Terrimicrobium	s__uncultured_bacterium_g__Terrimicrobium	OTU650	1	0	0	1	0	0	0	0	4	0	6
d__Bacteria	k__norank_d__Bacteria	p__Actinobacteriota	c__Actinobacteria	o__Corynebacteriales	f__Mycobacteriaceae	g__Mycobacterium	s__uncultured_bacterium_g__Mycobacterium	OTU19	3	0	4	15	3	0	1	0	2	0	28
d__Bacteria	k__norank_d__Bacteria	p__Patescibacteria	c__ABY1	o__unclassified_c__ABY1	f__unclassified_c__ABY1	g__unclassified_c__ABY1	s__unclassified_c__ABY1	OTU272	0	0	0	0	0	0	0	0	0	1	1
d__Bacteria	k__norank_d__Bacteria	p__Proteobacteria	c__Gammaproteobacteria	o__Methylococcales	f__Methylococcaceae	g__Methyloparacoccus	s__metagenome_g__Methyloparacoccus	OTU101	0	0	2	3	0	0	0	0	0	1	6
d__Bacteria	k__norank_d__Bacteria	p__Actinobacteriota	c__Acidimicrobiia	o__Actinomarinales	f__norank_o__Actinomarinales	g__norank_f__norank_o__Actinomarinales	s__unclassified_g__norank_f__norank_o__Actinomarinales	OTU512	0	0	0	2	0	0	0	0	0	1	3
d__Bacteria	k__norank_d__Bacteria	p__Cyanobacteria	c__Cyanobacteriia	o__Chloroplast	f__norank_o__Chloroplast	g__norank_f__norank_o__Chloroplast	s__Parachlorella_kessleri	OTU622	1	0	0	1	0	0	0	0	0	0	2
d__Bacteria	k__norank_d__Bacteria	p__Firmicutes	c__Bacilli	o__unclassified_c__Bacilli	f__unclassified_c__Bacilli	g__unclassified_c__Bacilli	s__unclassified_c__Bacilli	OTU1002	0	0	0	1	0	0	0	0	0	0	1
d__Bacteria	k__norank_d__Bacteria	p__Acidobacteriota	c__Acidobacteriae	o__Solibacterales	f__Solibacteraceae	g__Candidatus_Solibacter	s__unclassified_g__Candidatus_Solibacter	OTU432	0	1	0	0	0	0	0	0	0	0	1
d__Bacteria	k__norank_d__Bacteria	p__Chloroflexi	c__KD4-96	o__norank_c__KD4-96	f__norank_o__norank_c__KD4-96	g__norank_f__norank_o__norank_c__KD4-96	s__metagenome_g__norank_f__norank_o__norank_c__KD4-96	OTU393	0	0	0	2	0	0	0	0	0	1	3
d__Bacteria	k__norank_d__Bacteria	p__Chloroflexi	c__Anaerolineae	o__Anaerolineales	f__Anaerolineaceae	g__norank_f__Anaerolineaceae	s__unclassified_g__norank_f__Anaerolineaceae	OTU1128	2	0	0	1	0	0	0	0	0	2	5
d__Bacteria	k__norank_d__Bacteria	p__Bacteroidota	c__Kapabacteria	o__Kapabacteriales	f__norank_o__Kapabacteriales	g__norank_f__norank_o__Kapabacteriales	s__uncultured_bacterium_g__norank_f__norank_o__Kapabacteriales	OTU1070	0	0	0	0	0	0	0	1	0	1	2
d__Bacteria	k__norank_d__Bacteria	p__Firmicutes	c__Clostridia	o__Lachnospirales	f__Lachnospiraceae	g__Blautia	s__unclassified_g__Blautia	OTU500	0	0	0	1	0	0	0	0	0	0	1
d__Bacteria	k__norank_d__Bacteria	p__Bacteroidota	c__Bacteroidia	o__Bacteroidales	f__Prolixibacteraceae	g__Mangrovibacterium	s__unclassified_g__Mangrovibacterium	OTU330	0	0	0	0	0	0	0	1	0	0	1
d__Bacteria	k__norank_d__Bacteria	p__Patescibacteria	c__CPR2	o__norank_c__CPR2	f__norank_o__norank_c__CPR2	g__norank_f__norank_o__norank_c__CPR2	s__uncultured_bacterium_g__norank_f__norank_o__norank_c__CPR2	OTU235	0	1	0	0	1	0	0	0	0	0	2
d__Bacteria	k__norank_d__Bacteria	p__Planctomycetota	c__Planctomycetes	o__Gemmatales	f__Gemmataceae	g__norank_f__Gemmataceae	s__bacterium_enrichment_culture_clone_B1452011	OTU516	0	0	0	2	2	0	1	0	0	0	5
d__Bacteria	k__norank_d__Bacteria	p__Patescibacteria	c__Saccharimonadia	o__Saccharimonadales	f__norank_o__Saccharimonadales	g__norank_f__norank_o__Saccharimonadales	s__uncultured_bacterium_g__norank_f__norank_o__Saccharimonadales	OTU471	0	0	2	0	0	0	0	0	0	0	2
d__Bacteria	k__norank_d__Bacteria	p__Proteobacteria	c__Gammaproteobacteria	o__Xanthomonadales	f__Xanthomonadaceae	g__Luteimonas	s__uncultured_Lysobacter_sp._g__Luteimonas	OTU944	0	2	0	8	0	0	0	2	0	0	12
d__Bacteria	k__norank_d__Bacteria	p__Patescibacteria	c__Saccharimonadia	o__Saccharimonadales	f__norank_o__Saccharimonadales	g__norank_f__norank_o__Saccharimonadales	s__uncultured_bacterium_g__norank_f__norank_o__Saccharimonadales	OTU473	0	0	1	0	0	0	0	0	0	0	1
d__Bacteria	k__norank_d__Bacteria	p__Firmicutes	c__Bacilli	o__Bacillales	f__Bacillaceae	g__Bacillus	s__Bacillus_anthracis_g__Bacillus	OTU1039	0	0	0	0	0	0	0	1	0	0	1
d__Bacteria	k__norank_d__Bacteria	p__Bacteroidota	c__Bacteroidia	o__Chitinophagales	f__Chitinophagaceae	g__Aurantisolimonas	s__uncultured_bacterium_g__Aurantisolimonas	OTU488	0	0	1	0	0	0	0	0	0	1	2
d__Bacteria	k__norank_d__Bacteria	p__Firmicutes	c__Bacilli	o__Lactobacillales	f__Leuconostocaceae	g__Weissella	s__Weissella_ceti	OTU693	0	0	0	1	0	0	0	0	0	0	1
d__Bacteria	k__norank_d__Bacteria	p__Chloroflexi	c__Anaerolineae	o__Anaerolineales	f__Anaerolineaceae	g__norank_f__Anaerolineaceae	s__unclassified_g__norank_f__Anaerolineaceae	OTU779	1	0	0	2	0	0	0	0	1	0	4
d__Bacteria	k__norank_d__Bacteria	p__Proteobacteria	c__Alphaproteobacteria	o__Caulobacterales	f__Caulobacteraceae	g__norank_f__Caulobacteraceae	s__uncultured_bacterium_g__norank_f__Caulobacteraceae	OTU869	0	0	0	0	0	1	0	3	0	0	4
d__Bacteria	k__norank_d__Bacteria	p__Actinobacteriota	c__Acidimicrobiia	o__IMCC26256	f__norank_o__IMCC26256	g__norank_f__norank_o__IMCC26256	s__uncultured_Acidimicrobiia_bacterium_g__norank_f__norank	OTU599	0	0	0	6	2	0	0	0	0	0	8
d__Bacteria	k__norank_d__Bacteria	p__Proteobacteria	c__Gammaproteobacteria	o__Pseudomonadales	f__Moraxellaceae	g__Psychrobacter	s__Psychrobacter_meningitidis	OTU1079	0	0	0	0	0	0	0	1	0	1	2
d__Bacteria	k__norank_d__Bacteria	p__Proteobacteria	c__Alphaproteobacteria	o__Rhizobiales	f__Xanthobacteraceae	g__Pseudorhodoplanes	s__uncultured_bacterium_g__Pseudorhodoplanes	OTU22	0	0	0	0	0	0	0	0	0	1	1
d__Bacteria	k__norank_d__Bacteria	p__Chloroflexi	c__Anaerolineae	o__Caldilineales	f__Caldilineaceae	g__norank_f__Caldilineaceae	s__metagenome_g__norank_f__Caldilineaceae	OTU735	1	0	1	2	0	0	0	0	0	0	4
d__Bacteria	k__norank_d__Bacteria	p__Chloroflexi	c__Anaerolineae	o__SBR1031	f__A4b	g__norank_f__A4b	s__uncultured_bacterium_g__norank_f__A4b	OTU801	0	0	0	0	0	0	0	0	0	3	3
d__Bacteria	k__norank_d__Bacteria	p__Verrucomicrobiota	c__Verrucomicrobiae	o__Chthoniobacterales	f__Chthoniobacteraceae	g__Chthoniobacter	s__uncultured_Verrucomicrobia_bacterium_g__Chthoniobacter	OTU319	0	0	1	0	0	0	0	0	0	1	2
d__Bacteria	k__norank_d__Bacteria	p__Proteobacteria	c__Gammaproteobacteria	o__Aeromonadales	f__Aeromonadaceae	g__Aeromonas	s__Aeromonas_caviae	OTU960	20	145	571	33	116	502	106	356	459	46	2354
d__Bacteria	k__norank_d__Bacteria	p__Acidobacteriota	c__Acidobacteriae	o__Solibacterales	f__Solibacteraceae	g__Candidatus_Solibacter	s__uncultured_Acidobacteria_bacterium_g__Candidatus_Solibacter	OTU1042	0	1	0	0	0	0	0	0	0	0	1
d__Bacteria	k__norank_d__Bacteria	p__Actinobacteriota	c__Actinobacteria	o__unclassified_c__Actinobacteria	f__unclassified_c__Actinobacteria	g__unclassified_c__Actinobacteria	s__unclassified_c__Actinobacteria	OTU545	3	1	2	10	3	0	0	0	0	0	19
d__Bacteria	k__norank_d__Bacteria	p__Desulfobacterota	c__Syntrophobacteria	o__Syntrophobacterales	f__Syntrophobacteraceae	g__norank_f__Syntrophobacteraceae	s__uncultured_bacterium_g__norank_f__Syntrophobacteraceae	OTU521	0	0	0	1	0	0	0	0	0	0	1
d__Bacteria	k__norank_d__Bacteria	p__Chloroflexi	c__Anaerolineae	o__Anaerolineales	f__Anaerolineaceae	g__unclassified_f__Anaerolineaceae	s__unclassified_f__Anaerolineaceae	OTU662	3	0	0	0	0	0	0	0	0	2	5
d__Bacteria	k__norank_d__Bacteria	p__Bacteroidota	c__Kapabacteria	o__Kapabacteriales	f__norank_o__Kapabacteriales	g__norank_f__norank_o__Kapabacteriales	s__uncultured_bacterium_g__norank_f__norank_o__Kapabacteriales	OTU197	0	0	0	0	0	0	0	1	0	0	1
d__Bacteria	k__norank_d__Bacteria	p__Cyanobacteria	c__Cyanobacteriia	o__Chloroplast	f__norank_o__Chloroplast	g__norank_f__norank_o__Chloroplast	s__Mychonastes_jurisii	OTU446	0	0	0	0	0	0	0	0	0	1	1
d__Bacteria	k__norank_d__Bacteria	p__Bdellovibrionota	c__Oligoflexia	o__Oligoflexales	f__norank_o__Oligoflexales	g__norank_f__norank_o__Oligoflexales	s__uncultured_bacterium_g__norank_f__norank_o__Oligoflexales	OTU56	2	0	0	0	0	0	0	0	0	0	2
d__Bacteria	k__norank_d__Bacteria	p__Cyanobacteria	c__Cyanobacteriia	o__Cyanobacteriales	f__Nostocaceae	g__Nostoc_PCC-8976	s__unclassified_g__Nostoc_PCC-8976	OTU1122	0	1	0	1	0	0	0	0	0	2	4
d__Bacteria	k__norank_d__Bacteria	p__Bacteroidota	c__Bacteroidia	o__Chitinophagales	f__Saprospiraceae	g__norank_f__Saprospiraceae	s__unclassified_g__norank_f__Saprospiraceae	OTU804	0	0	0	0	0	0	0	0	0	3	3
d__Bacteria	k__norank_d__Bacteria	p__Proteobacteria	c__Alphaproteobacteria	o__Rhizobiales	f__Xanthobacteraceae	g__Bradyrhizobium	s__unclassified_g__Bradyrhizobium	OTU322	0	0	0	3	0	0	0	0	0	0	3
d__Bacteria	k__norank_d__Bacteria	p__Actinobacteriota	c__Actinobacteria	o__Kineosporiales	f__Kineosporiaceae	g__Kineosporia	s__uncultured_bacterium_g__Kineosporia	OTU701	0	0	0	0	0	0	0	2	0	0	2
d__Bacteria	k__norank_d__Bacteria	p__Actinobacteriota	c__Thermoleophilia	o__Gaiellales	f__norank_o__Gaiellales	g__norank_f__norank_o__Gaiellales	s__metagenome_g__norank_f__norank_o__Gaiellales	OTU522	0	1	3	3	0	0	0	0	1	0	8
d__Bacteria	k__norank_d__Bacteria	p__Actinobacteriota	c__Actinobacteria	o__Micrococcales	f__Microbacteriaceae	g__Agromyces	s__unclassified_g__Agromyces	OTU1157	0	0	1	1	0	0	0	0	0	0	2
d__Bacteria	k__norank_d__Bacteria	p__Cyanobacteria	c__Cyanobacteriia	o__Chloroplast	f__norank_o__Chloroplast	g__norank_f__norank_o__Chloroplast	s__unclassified_g__norank_f__norank_o__Chloroplast	OTU406	1	0	0	0	0	0	0	0	1	0	2
d__Bacteria	k__norank_d__Bacteria	p__Cyanobacteria	c__Cyanobacteriia	o__Chloroplast	f__norank_o__Chloroplast	g__norank_f__norank_o__Chloroplast	s__unclassified_g__norank_f__norank_o__Chloroplast	OTU402	8	0	0	4	2	0	0	1	5	14	34
d__Bacteria	k__norank_d__Bacteria	p__Bacteroidota	c__Bacteroidia	o__Chitinophagales	f__Chitinophagaceae	g__Lacibacter	s__Lacibacter_cauensis	OTU344	1	0	0	0	0	0	0	1	0	0	2
d__Bacteria	k__norank_d__Bacteria	p__Actinobacteriota	c__Coriobacteriia	o__OPB41	f__norank_o__OPB41	g__norank_f__norank_o__OPB41	s__uncultured_Coriobacteriia_bacterium	OTU864	0	0	0	1	1	0	0	0	1	0	3
d__Bacteria	k__norank_d__Bacteria	p__Bacteroidota	c__Bacteroidia	o__Sphingobacteriales	f__Lentimicrobiaceae	g__norank_f__Lentimicrobiaceae	s__uncultured_Sphingobacteriales_bacterium_g__norank_f__Lentimicrobiaceae	OTU619	0	0	0	0	0	0	0	1	0	0	1
d__Bacteria	k__norank_d__Bacteria	p__Proteobacteria	c__Gammaproteobacteria	o__Cellvibrionales	f__Halieaceae	g__OM60NOR5_clade	s__uncultured_bacterium_g__OM60NOR5_clade	OTU213	0	0	3	0	0	0	0	0	0	0	3
d__Bacteria	k__norank_d__Bacteria	p__Firmicutes	c__Bacilli	o__Bacillales	f__Planococcaceae	g__Kurthia	s__Kurthia_sp._11kri321	OTU470	0	0	5	0	0	0	0	3	0	0	8
d__Bacteria	k__norank_d__Bacteria	p__Firmicutes	c__Clostridia	o__norank_c__Clostridia	f__Hungateiclostridiaceae	g__unclassified_f__Hungateiclostridiaceae	s__unclassified_f__Hungateiclostridiaceae	OTU1152	1	0	0	0	0	0	0	0	0	0	1
d__Bacteria	k__norank_d__Bacteria	p__Actinobacteriota	c__Actinobacteria	o__Frankiales	f__Sporichthyaceae	g__hgcI_clade	s__uncultured_bacterium_g__hgcI_clade	OTU956	0	1	0	0	0	0	0	0	0	0	1
d__Bacteria	k__norank_d__Bacteria	p__Patescibacteria	c__unclassified_p__Patescibacteria	o__unclassified_p__Patescibacteria	f__unclassified_p__Patescibacteria	g__unclassified_p__Patescibacteria	s__unclassified_p__Patescibacteria	OTU731	0	1	3	4	0	0	0	0	0	0	8
d__Bacteria	k__norank_d__Bacteria	p__Bacteroidota	c__Bacteroidia	o__Chitinophagales	f__Saprospiraceae	g__norank_f__Saprospiraceae	s__uncultured_bacterium_g__norank_f__Saprospiraceae	OTU460	0	0	8	0	0	0	0	0	1	0	9
d__Bacteria	k__norank_d__Bacteria	p__Planctomycetota	c__Planctomycetes	o__Gemmatales	f__Gemmataceae	g__norank_f__Gemmataceae	s__unclassified_g__norank_f__Gemmataceae	OTU1062	0	0	0	0	0	0	0	0	1	0	1
d__Bacteria	k__norank_d__Bacteria	p__Patescibacteria	c__WWE3	o__norank_c__WWE3	f__norank_o__norank_c__WWE3	g__norank_f__norank_o__norank_c__WWE3	s__unclassified_g__norank_f__norank_o__norank_c__WWE3	OTU1010	0	0	1	0	0	0	0	0	0	0	1
d__Bacteria	k__norank_d__Bacteria	p__Proteobacteria	c__Gammaproteobacteria	o__Burkholderiales	f__SC-I-84	g__norank_f__SC-I-84	s__uncultured_prokaryote_g__norank_f__SC-I-84	OTU740	1	0	5	3	0	0	0	0	0	4	13
d__Bacteria	k__norank_d__Bacteria	p__Patescibacteria	c__CPR2	o__norank_c__CPR2	f__norank_o__norank_c__CPR2	g__norank_f__norank_o__norank_c__CPR2	s__uncultured_bacterium_g__norank_f__norank_o__norank_c__CPR2	OTU904	0	0	0	1	0	0	1	0	0	0	2
d__Bacteria	k__norank_d__Bacteria	p__Patescibacteria	c__CPR2	o__norank_c__CPR2	f__norank_o__norank_c__CPR2	g__norank_f__norank_o__norank_c__CPR2	s__uncultured_bacterium_g__norank_f__norank_o__norank_c__CPR2	OTU903	1	0	1	3	0	0	1	0	0	0	6
d__Bacteria	k__norank_d__Bacteria	p__unclassified_k__norank_d__Bacteria	c__unclassified_k__norank_d__Bacteria	o__unclassified_k__norank_d__Bacteria	f__unclassified_k__norank_d__Bacteria	g__unclassified_k__norank_d__Bacteria	s__unclassified_k__norank_d__Bacteria	OTU499	0	0	0	3	2	0	1	0	0	0	6
d__Bacteria	k__norank_d__Bacteria	p__Actinobacteriota	c__Thermoleophilia	o__Solirubrobacterales	f__Solirubrobacteraceae	g__Conexibacter	s__uncultured_bacterium_g__Conexibacter	OTU942	0	0	0	3	0	0	0	0	0	0	3
d__Bacteria	k__norank_d__Bacteria	p__Patescibacteria	c__WWE3	o__norank_c__WWE3	f__norank_o__norank_c__WWE3	g__norank_f__norank_o__norank_c__WWE3	s__unclassified_g__norank_f__norank_o__norank_c__WWE3	OTU496	0	0	0	2	0	0	0	0	0	0	2
d__Bacteria	k__norank_d__Bacteria	p__Proteobacteria	c__Alphaproteobacteria	o__Tistrellales	f__Geminicoccaceae	g__Candidatus_Alysiosphaera	s__uncultured_bacterium_g__Candidatus_Alysiosphaera	OTU298	0	0	0	0	0	0	0	1	0	0	1
d__Bacteria	k__norank_d__Bacteria	p__Acidobacteriota	c__Blastocatellia	o__Blastocatellales	f__Blastocatellaceae	g__JGI_0001001-H03	s__uncultured_bacterium_g__JGI_0001001-H03	OTU566	0	0	0	0	0	0	0	0	0	1	1
d__Bacteria	k__norank_d__Bacteria	p__unclassified_k__norank_d__Bacteria	c__unclassified_k__norank_d__Bacteria	o__unclassified_k__norank_d__Bacteria	f__unclassified_k__norank_d__Bacteria	g__unclassified_k__norank_d__Bacteria	s__unclassified_k__norank_d__Bacteria	OTU658	0	0	0	1	0	0	0	0	0	0	1
d__Bacteria	k__norank_d__Bacteria	p__Actinobacteriota	c__WCHB1-81	o__norank_c__WCHB1-81	f__norank_o__norank_c__WCHB1-81	g__norank_f__norank_o__norank_c__WCHB1-81	s__uncultured_bacterium_g__norank_f__norank_o__norank_c__WCHB1-81	OTU134	0	0	0	1	0	0	0	0	0	0	1
d__Bacteria	k__norank_d__Bacteria	p__Chloroflexi	c__Anaerolineae	o__SBR1031	f__norank_o__SBR1031	g__norank_f__norank_o__SBR1031	s__unclassified_g__norank_f__norank_o__SBR1031	OTU831	0	0	1	1	0	0	0	0	0	0	2
d__Bacteria	k__norank_d__Bacteria	p__Chloroflexi	c__Anaerolineae	o__Anaerolineales	f__Anaerolineaceae	g__norank_f__Anaerolineaceae	s__unclassified_g__norank_f__Anaerolineaceae	OTU541	0	0	0	3	0	0	0	0	0	2	5
d__Bacteria	k__norank_d__Bacteria	p__Actinobacteriota	c__WCHB1-81	o__norank_c__WCHB1-81	f__norank_o__norank_c__WCHB1-81	g__norank_f__norank_o__norank_c__WCHB1-81	s__uncultured_bacterium_g__norank_f__norank_o__norank_c__WCHB1-81	OTU133	1	0	0	0	0	0	0	0	0	2	3
d__Bacteria	k__norank_d__Bacteria	p__Actinobacteriota	c__Thermoleophilia	o__Gaiellales	f__norank_o__Gaiellales	g__norank_f__norank_o__Gaiellales	s__unclassified_g__norank_f__norank_o__Gaiellales	OTU404	0	0	1	0	1	0	0	0	0	0	2
d__Bacteria	k__norank_d__Bacteria	p__Bacteroidota	c__Bacteroidia	o__Flavobacteriales	f__Weeksellaceae	g__unclassified_f__Weeksellaceae	s__unclassified_f__Weeksellaceae	OTU965	37	0	0	0	0	1	0	7	0	0	45
d__Bacteria	k__norank_d__Bacteria	p__Proteobacteria	c__Alphaproteobacteria	o__Rhizobiales	f__Pleomorphomonadaceae	g__Chthonobacter	s__uncultured_bacterium_g__Chthonobacter	OTU887	0	0	0	3	0	0	0	0	1	0	4
d__Bacteria	k__norank_d__Bacteria	p__Verrucomicrobiota	c__Verrucomicrobiae	o__Verrucomicrobiales	f__unclassified_o__Verrucomicrobiales	g__unclassified_o__Verrucomicrobiales	s__unclassified_o__Verrucomicrobiales	OTU1071	0	0	2	0	0	0	0	0	0	6	8
d__Bacteria	k__norank_d__Bacteria	p__Proteobacteria	c__Alphaproteobacteria	o__Sphingomonadales	f__Sphingomonadaceae	g__Erythrobacter	s__unclassified_g__Erythrobacter	OTU18	1	1	0	3	4	0	0	0	0	0	9
d__Bacteria	k__norank_d__Bacteria	p__Actinobacteriota	c__Actinobacteria	o__Kineosporiales	f__Kineosporiaceae	g__unclassified_f__Kineosporiaceae	s__unclassified_f__Kineosporiaceae	OTU102	65	9	45	40	12	3	4	4	0	0	182
d__Bacteria	k__norank_d__Bacteria	p__Actinobacteriota	c__Actinobacteria	o__Propionibacteriales	f__Nocardioidaceae	g__Nocardioides	s__Nocardioides_exalbidus	OTU704	0	0	0	2	0	0	1	0	0	1	4
d__Bacteria	k__norank_d__Bacteria	p__Actinobacteriota	c__Actinobacteria	o__Frankiales	f__Sporichthyaceae	g__hgcI_clade	s__uncultured_bacterium_g__hgcI_clade	OTU593	0	0	0	0	1	0	0	0	0	1	2
d__Bacteria	k__norank_d__Bacteria	p__Patescibacteria	c__Saccharimonadia	o__Saccharimonadales	f__norank_o__Saccharimonadales	g__norank_f__norank_o__Saccharimonadales	s__unclassified_g__norank_f__norank_o__Saccharimonadales	OTU531	1	2	0	2	0	0	0	0	0	0	5
d__Bacteria	k__norank_d__Bacteria	p__Firmicutes	c__Bacilli	o__Bacillales	f__Bacillaceae	g__Fictibacillus	s__Fictibacillus_arsenicus	OTU883	0	0	4	0	0	0	0	0	0	1	5
d__Bacteria	k__norank_d__Bacteria	p__Chloroflexi	c__Anaerolineae	o__SJA-15	f__norank_o__SJA-15	g__norank_f__norank_o__SJA-15	s__uncultured_bacterium_g__norank_f__norank_o__SJA-15	OTU507	0	0	0	1	0	0	0	0	0	0	1
d__Bacteria	k__norank_d__Bacteria	p__Patescibacteria	c__Saccharimonadia	o__Saccharimonadales	f__norank_o__Saccharimonadales	g__norank_f__norank_o__Saccharimonadales	s__unclassified_g__norank_f__norank_o__Saccharimonadales	OTU532	0	2	0	11	0	0	0	0	0	0	13
d__Bacteria	k__norank_d__Bacteria	p__Actinobacteriota	c__Actinobacteria	o__Propionibacteriales	f__Propionibacteriaceae	g__unclassified_f__Propionibacteriaceae	s__unclassified_f__Propionibacteriaceae	OTU534	0	0	0	1	0	0	0	0	0	0	1
d__Bacteria	k__norank_d__Bacteria	p__SAR324_cladeMarine_group_B	c__norank_p__SAR324_cladeMarine_group_B	o__norank_c__norank_p__SAR324_cladeMarine_group_B	f__norank_o__norank_c__norank_p__SAR324_cladeMarine_group_B	g__norank_f__norank_o__norank_c__norank_p__SAR324_cladeMarine_group_B	s__uncultured_delta_proteobacterium_g__norank_f__norank_o__norank_c__norank_p__SAR324_cladeMarine_group_B	OTU544	0	0	0	1	0	0	0	0	0	0	1
d__Bacteria	k__norank_d__Bacteria	p__Proteobacteria	c__Alphaproteobacteria	o__Rhodobacterales	f__Rhodobacteraceae	g__Albimonas	s__uncultured_bacterium_g__Albimonas	OTU539	0	38	50	1272	51	2	10	7	5	0	1435
d__Bacteria	k__norank_d__Bacteria	p__Firmicutes	c__Clostridia	o__Lachnospirales	f__Lachnospiraceae	g__Lachnoclostridium	s__unclassified_g__Lachnoclostridium	OTU220	0	0	0	0	1	0	0	0	0	0	1
d__Bacteria	k__norank_d__Bacteria	p__Proteobacteria	c__Gammaproteobacteria	o__Xanthomonadales	f__Xanthomonadaceae	g__Luteimonas	s__unclassified_g__Luteimonas	OTU20	0	0	22	0	0	0	0	0	0	0	22
d__Bacteria	k__norank_d__Bacteria	p__Proteobacteria	c__Gammaproteobacteria	o__Run-SP154	f__norank_o__Run-SP154	g__norank_f__norank_o__Run-SP154	s__uncultured_bacterium_g__norank_f__norank_o__Run-SP154	OTU556	0	0	0	2	0	0	0	0	0	0	2
d__Bacteria	k__norank_d__Bacteria	p__Chloroflexi	c__Anaerolineae	o__Caldilineales	f__Caldilineaceae	g__norank_f__Caldilineaceae	s__metagenome_g__norank_f__Caldilineaceae	OTU823	1	0	1	1	0	0	0	0	0	0	3
d__Bacteria	k__norank_d__Bacteria	p__Bacteroidota	c__Bacteroidia	o__Flavobacteriales	f__Weeksellaceae	g__norank_f__Weeksellaceae	s__uncultured_bacterium_g__norank_f__Weeksellaceae	OTU511	9	15	9	26	6	0	1	0	111	2	179
d__Bacteria	k__norank_d__Bacteria	p__Patescibacteria	c__CPR2	o__norank_c__CPR2	f__norank_o__norank_c__CPR2	g__norank_f__norank_o__norank_c__CPR2	s__uncultured_bacterium_g__norank_f__norank_o__norank_c__CPR2	OTU309	0	0	1	0	0	0	0	0	0	0	1
d__Bacteria	k__norank_d__Bacteria	p__Cyanobacteria	c__Cyanobacteriia	o__Chloroplast	f__norank_o__Chloroplast	g__norank_f__norank_o__Chloroplast	s__unclassified_g__norank_f__norank_o__Chloroplast	OTU795	0	0	0	2	0	0	0	0	0	0	2
d__Bacteria	k__norank_d__Bacteria	p__Patescibacteria	c__Saccharimonadia	o__Saccharimonadales	f__norank_o__Saccharimonadales	g__norank_f__norank_o__Saccharimonadales	s__uncultured_bacterium_g__norank_f__norank_o__Saccharimonadales	OTU547	0	0	0	1	0	0	0	0	0	0	1
d__Bacteria	k__norank_d__Bacteria	p__Dependentiae	c__Babeliae	o__Babeliales	f__Vermiphilaceae	g__norank_f__Vermiphilaceae	s__unclassified_g__norank_f__Vermiphilaceae	OTU289	0	1	0	0	0	0	0	0	0	0	1
d__Bacteria	k__norank_d__Bacteria	p__Fusobacteriota	c__Fusobacteriia	o__Fusobacteriales	f__Fusobacteriaceae	g__Cetobacterium	s__uncultured_bacterium_g__Cetobacterium	OTU820	0	0	0	0	0	0	0	0	0	1	1
d__Bacteria	k__norank_d__Bacteria	p__Proteobacteria	c__Alphaproteobacteria	o__Paracaedibacterales	f__Paracaedibacteraceae	g__Candidatus_Paracaedibacter	s__uncultured_bacterium_g__Candidatus_Paracaedibacter	OTU663	0	1	0	0	0	0	0	0	0	0	1
d__Bacteria	k__norank_d__Bacteria	p__Actinobacteriota	c__Actinobacteria	o__PeM15	f__norank_o__PeM15	g__norank_f__norank_o__PeM15	s__unclassified_g__norank_f__norank_o__PeM15	OTU21	4	5	22	50	14	0	2	3	7	0	107
d__Bacteria	k__norank_d__Bacteria	p__Desulfobacterota	c__Syntrophobacteria	o__Syntrophobacterales	f__Syntrophobacteraceae	g__Syntrophobacter	s__unclassified_g__Syntrophobacter	OTU503	0	1	0	1	0	0	0	0	0	0	2
d__Bacteria	k__norank_d__Bacteria	p__Firmicutes	c__Bacilli	o__RF39	f__norank_o__RF39	g__norank_f__norank_o__RF39	s__unclassified_g__norank_f__norank_o__RF39	OTU259	1	0	178	34	95	27	8	58	0	56	457
d__Bacteria	k__norank_d__Bacteria	p__Firmicutes	c__Clostridia	o__Clostridiales	f__Clostridiaceae	g__Clostridium_sensu_stricto_13	s__unclassified_g__Clostridium_sensu_stricto_13	OTU977	0	0	1	3	0	0	0	1	0	1	6
d__Bacteria	k__norank_d__Bacteria	p__Proteobacteria	c__Alphaproteobacteria	o__Rhodobacterales	f__Rhodobacteraceae	g__unclassified_f__Rhodobacteraceae	s__unclassified_f__Rhodobacteraceae	OTU786	0	0	1	0	0	0	0	0	0	0	1
d__Bacteria	k__norank_d__Bacteria	p__Proteobacteria	c__Gammaproteobacteria	o__Legionellales	f__Legionellaceae	g__Legionella	s__uncultured_bacterium_g__Legionella	OTU592	1	2	10	13	6	0	0	0	0	0	32
d__Bacteria	k__norank_d__Bacteria	p__Firmicutes	c__Bacilli	o__Exiguobacterales	f__Exiguobacteraceae	g__Exiguobacterium	s__Exiguobacterium_sp._AT1b	OTU850	4	2	31	10	4	4	1	12	0	24	92
d__Bacteria	k__norank_d__Bacteria	p__Cyanobacteria	c__Cyanobacteriia	o__Chloroplast	f__norank_o__Chloroplast	g__norank_f__norank_o__Chloroplast	s__Monoraphidium_neglectum	OTU659	0	0	0	1	0	0	0	0	0	0	1
d__Bacteria	k__norank_d__Bacteria	p__Actinobacteriota	c__WCHB1-81	o__norank_c__WCHB1-81	f__norank_o__norank_c__WCHB1-81	g__norank_f__norank_o__norank_c__WCHB1-81	s__uncultured_bacterium_g__norank_f__norank_o__norank_c__WCHB1-81	OTU4	0	0	0	0	1	0	0	0	1	1	3
d__Bacteria	k__norank_d__Bacteria	p__Proteobacteria	c__Alphaproteobacteria	o__Sphingomonadales	f__Sphingomonadaceae	g__Novosphingobium	s__uncultured_bacterium_g__Novosphingobium	OTU999	2	4	86	9	8	1	2	2	1	11	126
d__Bacteria	k__norank_d__Bacteria	p__Proteobacteria	c__Gammaproteobacteria	o__Pseudomonadales	f__Moraxellaceae	g__Acinetobacter	s__Acinetobacter_haemolyticus	OTU196	0	0	1	25	1	0	0	3	7	3	40
d__Bacteria	k__norank_d__Bacteria	p__Proteobacteria	c__Gammaproteobacteria	o__Legionellales	f__Legionellaceae	g__Legionella	s__uncultured_bacterium_g__Legionella	OTU1052	0	1	1	8	2	0	0	0	2	0	14
d__Bacteria	k__norank_d__Bacteria	p__Deinococcota	c__Deinococci	o__Deinococcales	f__Deinococcaceae	g__Deinococcus	s__Deinococcus_ficus	OTU1067	0	0	4	0	0	0	0	0	0	1	5
d__Bacteria	k__norank_d__Bacteria	p__Verrucomicrobiota	c__Verrucomicrobiae	o__Verrucomicrobiales	f__Rubritaleaceae	g__Luteolibacter	s__unclassified_g__Luteolibacter	OTU900	0	0	0	0	1	0	1	1	0	0	3
d__Bacteria	k__norank_d__Bacteria	p__Actinobacteriota	c__Acidimicrobiia	o__Microtrichales	f__norank_o__Microtrichales	g__norank_f__norank_o__Microtrichales	s__metagenome_g__norank_f__norank_o__Microtrichales	OTU523	0	1	0	1	1	0	1	1	0	0	5
d__Bacteria	k__norank_d__Bacteria	p__Proteobacteria	c__Alphaproteobacteria	o__norank_c__Alphaproteobacteria	f__norank_o__norank_c__Alphaproteobacteria	g__norank_f__norank_o__norank_c__Alphaproteobacteria	s__unclassified_g__norank_f__norank_o__norank_c__Alphaproteobacteria	OTU874	0	0	0	2	0	0	0	0	0	0	2
d__Bacteria	k__norank_d__Bacteria	p__Patescibacteria	c__Saccharimonadia	o__Saccharimonadales	f__norank_o__Saccharimonadales	g__norank_f__norank_o__Saccharimonadales	s__uncultured_bacterium_g__norank_f__norank_o__Saccharimonadales	OTU737	0	0	0	2	0	0	1	0	0	0	3
d__Bacteria	k__norank_d__Bacteria	p__Acidobacteriota	c__Vicinamibacteria	o__Subgroup_17	f__norank_o__Subgroup_17	g__norank_f__norank_o__Subgroup_17	s__metagenome_g__norank_f__norank_o__Subgroup_17	OTU570	0	0	0	0	0	0	0	0	0	1	1
d__Bacteria	k__norank_d__Bacteria	p__Firmicutes	c__Clostridia	o__Clostridiales	f__Clostridiaceae	g__unclassified_f__Clostridiaceae	s__unclassified_f__Clostridiaceae	OTU10	0	0	0	1	0	0	0	0	0	0	1
d__Bacteria	k__norank_d__Bacteria	p__Actinobacteriota	c__Actinobacteria	o__PeM15	f__norank_o__PeM15	g__norank_f__norank_o__PeM15	s__metagenome_g__norank_f__norank_o__PeM15	OTU3	3	10	6	35	1	0	1	1	3	2	62
d__Bacteria	k__norank_d__Bacteria	p__Proteobacteria	c__Gammaproteobacteria	o__Pseudomonadales	f__Moraxellaceae	g__Acinetobacter	s__unclassified_g__Acinetobacter	OTU652	1	0	1	0	0	0	0	0	0	0	2
d__Bacteria	k__norank_d__Bacteria	p__Proteobacteria	c__Gammaproteobacteria	o__Cellvibrionales	f__Halieaceae	g__OM60NOR5_clade	s__uncultured_bacterium_g__OM60NOR5_clade	OTU177	0	0	0	0	0	0	0	0	0	1	1
d__Bacteria	k__norank_d__Bacteria	p__Proteobacteria	c__Alphaproteobacteria	o__Acetobacterales	f__Acetobacteraceae	g__Roseomonas	s__metagenome_g__Roseomonas	OTU306	0	0	0	0	1	0	0	0	1	7	9
d__Bacteria	k__norank_d__Bacteria	p__Proteobacteria	c__Gammaproteobacteria	o__Run-SP154	f__norank_o__Run-SP154	g__norank_f__norank_o__Run-SP154	s__metagenome_g__norank_f__norank_o__Run-SP154	OTU290	5	6	14	25	4	0	1	2	0	5	62
d__Bacteria	k__norank_d__Bacteria	p__Actinobacteriota	c__Actinobacteria	o__Frankiales	f__Sporichthyaceae	g__Longivirga	s__uncultured_bacterium_g__Longivirga	OTU696	0	0	1	0	0	0	0	0	0	0	1
d__Bacteria	k__norank_d__Bacteria	p__Chloroflexi	c__Anaerolineae	o__Anaerolineales	f__Anaerolineaceae	g__norank_f__Anaerolineaceae	s__unclassified_g__norank_f__Anaerolineaceae	OTU732	0	0	0	0	0	0	0	0	0	1	1
d__Bacteria	k__norank_d__Bacteria	p__Chloroflexi	c__SHA-26	o__norank_c__SHA-26	f__norank_o__norank_c__SHA-26	g__norank_f__norank_o__norank_c__SHA-26	s__uncultured_bacterium_g__norank_f__norank_o__norank_c__SHA-26	OTU1104	0	0	0	0	0	0	0	0	0	1	1
d__Bacteria	k__norank_d__Bacteria	p__Chloroflexi	c__Anaerolineae	o__Caldilineales	f__Caldilineaceae	g__norank_f__Caldilineaceae	s__uncultured_bacterium_g__norank_f__Caldilineaceae	OTU515	0	0	0	1	0	0	0	0	0	0	1
d__Bacteria	k__norank_d__Bacteria	p__Actinobacteriota	c__Actinobacteria	o__Micrococcales	f__Intrasporangiaceae	g__unclassified_f__Intrasporangiaceae	s__unclassified_f__Intrasporangiaceae	OTU358	11	27	120	19	4	1	2	1	0	4	189
d__Bacteria	k__norank_d__Bacteria	p__Firmicutes	c__Bacilli	o__Erysipelotrichales	f__Erysipelotrichaceae	g__ZOR0006	s__Cetobacterium_sp._ZOR0034	OTU857	0	0	0	1	0	0	0	0	0	0	1
d__Bacteria	k__norank_d__Bacteria	p__Actinobacteriota	c__Actinobacteria	o__Micrococcales	f__Dermabacteraceae	g__Brachybacterium	s__Brachybacterium_paraconglomeratum	OTU902	0	0	17	2	0	0	1	1	0	0	21
d__Bacteria	k__norank_d__Bacteria	p__Firmicutes	c__Bacilli	o__Bacillales	f__Bacillaceae	g__Bacillus	s__unclassified_g__Bacillus	OTU1063	0	0	2	0	0	0	1	1	6	0	10
d__Bacteria	k__norank_d__Bacteria	p__Dependentiae	c__Babeliae	o__Babeliales	f__norank_o__Babeliales	g__norank_f__norank_o__Babeliales	s__unclassified_g__norank_f__norank_o__Babeliales	OTU80	0	0	0	1	1	0	0	0	0	0	2
d__Bacteria	k__norank_d__Bacteria	p__Patescibacteria	c__Saccharimonadia	o__Saccharimonadales	f__Saccharimonadaceae	g__TM7a	s__uncultured_bacterium_g__TM7a	OTU792	2	4	2	9	4	0	0	0	0	0	21
d__Bacteria	k__norank_d__Bacteria	p__Acidobacteriota	c__Subgroup_22	o__norank_c__Subgroup_22	f__norank_o__norank_c__Subgroup_22	g__norank_f__norank_o__norank_c__Subgroup_22	s__uncultured_bacterium_g__norank_f__norank_o__norank_c__Subgroup_22	OTU347	0	0	0	1	0	0	0	0	0	0	1
d__Bacteria	k__norank_d__Bacteria	p__Bacteroidota	c__Rhodothermia	o__Rhodothermales	f__Rhodothermaceae	g__Rubrivirga	s__uncultured_bacterium_g__Rubrivirga	OTU572	0	0	0	0	1	0	0	0	0	0	1
d__Bacteria	k__norank_d__Bacteria	p__Firmicutes	c__Bacilli	o__RF39	f__norank_o__RF39	g__norank_f__norank_o__RF39	s__unclassified_g__norank_f__norank_o__RF39	OTU487	0	1	38	0	0	1	0	0	0	0	40
d__Bacteria	k__norank_d__Bacteria	p__Patescibacteria	c__CPR2	o__norank_c__CPR2	f__norank_o__norank_c__CPR2	g__norank_f__norank_o__norank_c__CPR2	s__unclassified_g__norank_f__norank_o__norank_c__CPR2	OTU139	0	0	0	0	0	0	0	0	0	1	1
d__Bacteria	k__norank_d__Bacteria	p__Verrucomicrobiota	c__Verrucomicrobiae	o__Chthoniobacterales	f__Chthoniobacteraceae	g__LD29	s__uncultured_bacterium_g__LD29	OTU661	19	6	51	145	43	2	7	5	28	35	341
d__Bacteria	k__norank_d__Bacteria	p__Proteobacteria	c__Gammaproteobacteria	o__Legionellales	f__Legionellaceae	g__Legionella	s__uncultured_bacterium_g__Legionella	OTU475	0	0	1	5	1	0	0	1	0	0	8
d__Bacteria	k__norank_d__Bacteria	p__Firmicutes	c__Bacilli	o__Bacillales	f__Planococcaceae	g__Lysinibacillus	s__unclassified_g__Lysinibacillus	OTU1069	0	0	0	0	0	0	0	2	0	2	4
d__Bacteria	k__norank_d__Bacteria	p__Firmicutes	c__Bacilli	o__Bacillales	f__Planococcaceae	g__Planococcus	s__Planococcus_rifietoensis	OTU612	2	4	53	72	8	10	3	16	2	18	188
d__Bacteria	k__norank_d__Bacteria	p__Proteobacteria	c__Alphaproteobacteria	o__Sphingomonadales	f__Sphingomonadaceae	g__Altererythrobacter	s__unclassified_g__Altererythrobacter	OTU1098	0	0	1	0	1	0	0	0	0	0	2
d__Bacteria	k__norank_d__Bacteria	p__Proteobacteria	c__Alphaproteobacteria	o__Rhizobiales	f__Rhizobiales_Incertae_Sedis	g__Phreatobacter	s__uncultured_bacterium_g__Phreatobacter	OTU151	0	0	0	1	0	0	0	0	0	0	1
d__Bacteria	k__norank_d__Bacteria	p__Chloroflexi	c__Anaerolineae	o__1-20	f__norank_o__1-20	g__norank_f__norank_o__1-20	s__uncultured_bacterium_g__norank_f__norank_o__1-20	OTU287	1	0	0	3	0	0	0	0	0	2	6
d__Bacteria	k__norank_d__Bacteria	p__Chloroflexi	c__Anaerolineae	o__Caldilineales	f__Caldilineaceae	g__norank_f__Caldilineaceae	s__metagenome_g__norank_f__Caldilineaceae	OTU606	0	0	0	0	2	0	1	0	1	1	5
d__Bacteria	k__norank_d__Bacteria	p__SAR324_cladeMarine_group_B	c__norank_p__SAR324_cladeMarine_group_B	o__norank_c__norank_p__SAR324_cladeMarine_group_B	f__norank_o__norank_c__norank_p__SAR324_cladeMarine_group_B	g__norank_f__norank_o__norank_c__norank_p__SAR324_cladeMarine_group_B	s__bacterium_enrichment_culture_clone_B302011	OTU537	0	0	0	2	1	0	0	0	0	0	3
d__Bacteria	k__norank_d__Bacteria	p__Firmicutes	c__Bacilli	o__Entomoplasmatales	f__Entomoplasmatales_Incertae_Sedis	g__Candidatus_Hepatoplasma	s__unclassified_g__Candidatus_Hepatoplasma	OTU591	154	757	131	302	3016	250	39	1936	283	0	6868
d__Bacteria	k__norank_d__Bacteria	p__Chloroflexi	c__Anaerolineae	o__Anaerolineales	f__Anaerolineaceae	g__norank_f__Anaerolineaceae	s__unclassified_g__norank_f__Anaerolineaceae	OTU607	11	0	4	6	4	0	0	1	0	1	27
d__Bacteria	k__norank_d__Bacteria	p__Bacteroidota	c__Bacteroidia	o__Flavobacteriales	f__Flavobacteriaceae	g__Flavobacterium	s__Flavobacterium_ummariense	OTU486	0	0	2	0	0	0	0	0	0	0	2
d__Bacteria	k__norank_d__Bacteria	p__Patescibacteria	c__Saccharimonadia	o__Saccharimonadales	f__unclassified_o__Saccharimonadales	g__unclassified_o__Saccharimonadales	s__unclassified_o__Saccharimonadales	OTU970	0	1	3	6	1	1	1	6	0	1	20
d__Bacteria	k__norank_d__Bacteria	p__Actinobacteriota	c__Acidimicrobiia	o__Microtrichales	f__Ilumatobacteraceae	g__CL500-29_marine_group	s__uncultured_bacterium_g__CL500-29_marine_group	OTU138	0	0	0	2	0	0	0	0	0	0	2
d__Bacteria	k__norank_d__Bacteria	p__Firmicutes	c__Clostridia	o__Clostridiales	f__Clostridiaceae	g__Proteiniclasticum	s__uncultured_bacterium_g__Proteiniclasticum	OTU1066	0	0	0	0	0	0	0	7	0	7	14
d__Bacteria	k__norank_d__Bacteria	p__Patescibacteria	c__Saccharimonadia	o__Saccharimonadales	f__unclassified_o__Saccharimonadales	g__unclassified_o__Saccharimonadales	s__unclassified_o__Saccharimonadales	OTU870	0	0	1	4	0	0	0	0	0	0	5
d__Bacteria	k__norank_d__Bacteria	p__Cyanobacteria	c__Cyanobacteriia	o__Chloroplast	f__norank_o__Chloroplast	g__norank_f__norank_o__Chloroplast	s__Raphidocelis_subcapitata	OTU538	0	0	0	1	0	0	0	0	0	0	1
d__Bacteria	k__norank_d__Bacteria	p__Firmicutes	c__Bacilli	o__Mycoplasmatales	f__Mycoplasmataceae	g__Candidatus_Bacilloplasma	s__uncultured_bacterium_g__Candidatus_Bacilloplasma	OTU852	18	0	0	17	4	7	3	17	0	0	66
d__Bacteria	k__norank_d__Bacteria	p__Cyanobacteria	c__Cyanobacteriia	o__Chloroplast	f__norank_o__Chloroplast	g__norank_f__norank_o__Chloroplast	s__Oscillatoriales_cyanobacterium_HF1	OTU1160	1	0	0	0	0	0	0	0	1	0	2
d__Bacteria	k__norank_d__Bacteria	p__Bdellovibrionota	c__Bdellovibrionia	o__Bdellovibrionales	f__Bdellovibrionaceae	g__Bdellovibrio	s__unclassified_g__Bdellovibrio	OTU189	0	0	1	1	1	0	0	0	0	0	3
d__Bacteria	k__norank_d__Bacteria	p__Actinobacteriota	c__Actinobacteria	o__unclassified_c__Actinobacteria	f__unclassified_c__Actinobacteria	g__unclassified_c__Actinobacteria	s__unclassified_c__Actinobacteria	OTU817	0	0	0	3	1	0	0	0	0	0	4
d__Bacteria	k__norank_d__Bacteria	p__Bacteroidota	c__Bacteroidia	o__Sphingobacteriales	f__Lentimicrobiaceae	g__norank_f__Lentimicrobiaceae	s__unclassified_g__norank_f__Lentimicrobiaceae	OTU338	0	0	0	2	0	0	0	0	0	0	2
d__Bacteria	k__norank_d__Bacteria	p__Actinobacteriota	c__Actinobacteria	o__Streptomycetales	f__Streptomycetaceae	g__Streptomyces	s__Streptomyces_scabiei	OTU1021	0	0	2	0	0	0	0	0	0	0	2
d__Bacteria	k__norank_d__Bacteria	p__Actinobacteriota	c__unclassified_p__Actinobacteriota	o__unclassified_p__Actinobacteriota	f__unclassified_p__Actinobacteriota	g__unclassified_p__Actinobacteriota	s__unclassified_p__Actinobacteriota	OTU491	0	2	1	1	0	0	0	0	0	0	4
d__Bacteria	k__norank_d__Bacteria	p__Proteobacteria	c__Gammaproteobacteria	o__Legionellales	f__Legionellaceae	g__Legionella	s__uncultured_bacterium_g__Legionella	OTU329	0	1	0	0	1	0	0	0	0	0	2
d__Bacteria	k__norank_d__Bacteria	p__Actinobacteriota	c__Actinobacteria	o__Micrococcales	f__Microbacteriaceae	g__Leucobacter	s__uncultured_bacterium_g__Leucobacter	OTU502	0	0	8	7	0	0	0	3	1	0	19
d__Bacteria	k__norank_d__Bacteria	p__Bacteroidota	c__Bacteroidia	o__Flavobacteriales	f__Weeksellaceae	g__Chryseobacterium	s__uncultured_bacterium_g__Chryseobacterium	OTU459	2	0	4	0	4	1	0	0	0	0	11
d__Bacteria	k__norank_d__Bacteria	p__Proteobacteria	c__Alphaproteobacteria	o__Rickettsiales	f__norank_o__Rickettsiales	g__norank_f__norank_o__Rickettsiales	s__uncultured_bacterium_g__norank_f__norank_o__Rickettsiales	OTU838	0	3	0	0	12	0	0	0	0	0	15
d__Bacteria	k__norank_d__Bacteria	p__Verrucomicrobiota	c__Chlamydiae	o__Chlamydiales	f__cvE6	g__norank_f__cvE6	s__uncultured_bacterium_g__norank_f__cvE6	OTU980	0	0	0	1	1	0	0	0	0	0	2
d__Bacteria	k__norank_d__Bacteria	p__Deinococcota	c__Deinococci	o__Deinococcales	f__Trueperaceae	g__Truepera	s__uncultured_bacterium_g__Truepera	OTU378	0	0	1	0	0	0	0	0	0	2	3
d__Bacteria	k__norank_d__Bacteria	p__Bacteroidota	c__Bacteroidia	o__Bacteroidales	f__Bacteroidaceae	g__Bacteroides	s__Bacteroides_graminisolvens	OTU963	0	0	0	0	0	0	0	0	0	1	1
d__Bacteria	k__norank_d__Bacteria	p__Cyanobacteria	c__Cyanobacteriia	o__Chloroplast	f__norank_o__Chloroplast	g__norank_f__norank_o__Chloroplast	s__unclassified_g__norank_f__norank_o__Chloroplast	OTU609	0	0	0	1	3	0	0	0	1	0	5
d__Bacteria	k__norank_d__Bacteria	p__Cyanobacteria	c__Sericytochromatia	o__norank_c__Sericytochromatia	f__norank_o__norank_c__Sericytochromatia	g__norank_f__norank_o__norank_c__Sericytochromatia	s__Hyaloperonospora_arabidopsidis_g__norank	OTU52	1	0	0	0	0	0	0	0	0	0	1
d__Bacteria	k__norank_d__Bacteria	p__Cyanobacteria	c__Cyanobacteriia	o__Cyanobacteriales	f__Phormidiaceae	g__Planktothrix_NIVA-CYA_15	s__uncultured_bacterium_g__Planktothrix_NIVA-CYA_15	OTU47	61	4	24	61	0	0	0	3	37	5	195
d__Bacteria	k__norank_d__Bacteria	p__Chloroflexi	c__Anaerolineae	o__SJA-15	f__norank_o__SJA-15	g__norank_f__norank_o__SJA-15	s__uncultured_bacterium_g__norank_f__norank_o__SJA-15	OTU783	1	1	0	3	0	0	0	0	0	3	8
d__Bacteria	k__norank_d__Bacteria	p__Proteobacteria	c__Gammaproteobacteria	o__Pseudomonadales	f__Pseudomonadaceae	g__Pseudomonas	s__unclassified_g__Pseudomonas	OTU476	0	0	1	0	0	0	0	0	0	0	1
d__Bacteria	k__norank_d__Bacteria	p__Firmicutes	c__Clostridia	o__Peptostreptococcales-Tissierellales	f__Acidaminobacteraceae	g__Acidaminobacter	s__uncultured_bacterium_g__Acidaminobacter	OTU1095	0	0	0	0	0	2	0	1	0	0	3
d__Bacteria	k__norank_d__Bacteria	p__Patescibacteria	c__Saccharimonadia	o__Saccharimonadales	f__norank_o__Saccharimonadales	g__norank_f__norank_o__Saccharimonadales	s__unclassified_g__norank_f__norank_o__Saccharimonadales	OTU1099	0	0	1	5	1	0	0	0	0	0	7
d__Bacteria	k__norank_d__Bacteria	p__Dependentiae	c__Babeliae	o__Babeliales	f__UBA12409	g__norank_f__UBA12409	s__uncultured_bacterium_g__norank_f__UBA12409	OTU975	0	0	0	2	0	0	0	0	0	1	3
d__Bacteria	k__norank_d__Bacteria	p__Sva0485	c__norank_p__Sva0485	o__norank_c__norank_p__Sva0485	f__norank_o__norank_c__norank_p__Sva0485	g__norank_f__norank_o__norank_c__norank_p__Sva0485	s__uncultured_bacterium_g__norank_f__norank_o__norank_c__norank_p__Sva0485	OTU146	0	0	0	0	0	0	0	0	0	1	1
d__Bacteria	k__norank_d__Bacteria	p__unclassified_k__norank_d__Bacteria	c__unclassified_k__norank_d__Bacteria	o__unclassified_k__norank_d__Bacteria	f__unclassified_k__norank_d__Bacteria	g__unclassified_k__norank_d__Bacteria	s__unclassified_k__norank_d__Bacteria	OTU528	0	0	0	1	0	0	0	0	0	0	1
d__Bacteria	k__norank_d__Bacteria	p__Actinobacteriota	c__Actinobacteria	o__PeM15	f__norank_o__PeM15	g__norank_f__norank_o__PeM15	s__metagenome_g__norank_f__norank_o__PeM15	OTU569	0	0	0	1	0	0	0	0	0	0	1
d__Bacteria	k__norank_d__Bacteria	p__unclassified_k__norank_d__Bacteria	c__unclassified_k__norank_d__Bacteria	o__unclassified_k__norank_d__Bacteria	f__unclassified_k__norank_d__Bacteria	g__unclassified_k__norank_d__Bacteria	s__unclassified_k__norank_d__Bacteria	OTU527	75	1	0	11	1	20	1	64	0	0	173
d__Bacteria	k__norank_d__Bacteria	p__unclassified_k__norank_d__Bacteria	c__unclassified_k__norank_d__Bacteria	o__unclassified_k__norank_d__Bacteria	f__unclassified_k__norank_d__Bacteria	g__unclassified_k__norank_d__Bacteria	s__unclassified_k__norank_d__Bacteria	OTU288	0	0	0	0	0	0	0	1	0	0	1
d__Bacteria	k__norank_d__Bacteria	p__Proteobacteria	c__Gammaproteobacteria	o__Burkholderiales	f__Sutterellaceae	g__norank_f__Sutterellaceae	s__unclassified_g__norank_f__Sutterellaceae	OTU916	2	0	1	1	2	0	0	2	2	2	12
d__Bacteria	k__norank_d__Bacteria	p__Bacteroidota	c__Bacteroidia	o__Flavobacteriales	f__Weeksellaceae	g__unclassified_f__Weeksellaceae	s__unclassified_f__Weeksellaceae	OTU421	10	22	0	15	5	0	1	0	24	0	77
d__Bacteria	k__norank_d__Bacteria	p__Desulfobacterota	c__Desulfobulbia	o__Desulfobulbales	f__Desulfocapsaceae	g__unclassified_f__Desulfocapsaceae	s__unclassified_f__Desulfocapsaceae	OTU791	0	0	0	0	0	1	0	0	0	0	1
d__Bacteria	k__norank_d__Bacteria	p__Actinobacteriota	c__Acidimicrobiia	o__IMCC26256	f__norank_o__IMCC26256	g__norank_f__norank_o__IMCC26256	s__uncultured_Ferrimicrobium_sp._g__norank	OTU222	0	1	0	0	0	0	0	0	0	0	1
d__Bacteria	k__norank_d__Bacteria	p__Cyanobacteria	c__Cyanobacteriia	o__Chloroplast	f__norank_o__Chloroplast	g__norank_f__norank_o__Chloroplast	s__unclassified_g__norank_f__norank_o__Chloroplast	OTU506	0	0	0	1	0	0	1	0	0	1	3
d__Bacteria	k__norank_d__Bacteria	p__Firmicutes	c__Clostridia	o__Clostridiales	f__Clostridiaceae	g__Clostridium_sensu_stricto_12	s__Clostridium_carboxidivorans_P7	OTU888	0	0	1	0	0	0	0	0	0	0	1
d__Bacteria	k__norank_d__Bacteria	p__Firmicutes	c__Bacilli	o__Mycoplasmatales	f__Mycoplasmataceae	g__norank_f__Mycoplasmataceae	s__uncultured_Firmicutes_bacterium_g__norank_f__Mycoplasmataceae	OTU1163	2710	1162	1405	2916	1171	671	233	3347	889	3	14507
d__Bacteria	k__norank_d__Bacteria	p__Proteobacteria	c__Gammaproteobacteria	o__unclassified_c__Gammaproteobacteria	f__unclassified_c__Gammaproteobacteria	g__unclassified_c__Gammaproteobacteria	s__unclassified_c__Gammaproteobacteria	OTU236	0	0	1	1	0	0	0	0	0	0	2
d__Bacteria	k__norank_d__Bacteria	p__Firmicutes	c__Clostridia	o__Peptostreptococcales-Tissierellales	f__Peptostreptococcaceae	g__Romboutsia	s__uncultured_bacterium_g__Romboutsia	OTU882	2	1	7	16	3	1	1	1	0	7	39
d__Bacteria	k__norank_d__Bacteria	p__Patescibacteria	c__Saccharimonadia	o__Saccharimonadales	f__LWQ8	g__norank_f__LWQ8	s__uncultured_bacterium_g__norank_f__LWQ8	OTU620	1	0	0	0	0	0	0	0	0	0	1
d__Bacteria	k__norank_d__Bacteria	p__Proteobacteria	c__Alphaproteobacteria	o__Reyranellales	f__Reyranellaceae	g__Reyranella	s__uncultured_bacterium_g__Reyranella	OTU996	0	0	1	0	0	0	0	0	0	0	1
d__Bacteria	k__norank_d__Bacteria	p__Firmicutes	c__Bacilli	o__Erysipelotrichales	f__Erysipelotrichaceae	g__Anaerorhabdus_furcosa_group	s__uncultured_Anaerorhabdus_sp.	OTU573	0	7	177	639	342	557	34	254	1	676	2687
d__Bacteria	k__norank_d__Bacteria	p__Firmicutes	c__Bacilli	o__Lactobacillales	f__Vagococcaceae	g__Vagococcus	s__unclassified_g__Vagococcus	OTU1133	0	0	3	0	0	1	0	0	0	0	4
d__Bacteria	k__norank_d__Bacteria	p__Chloroflexi	c__Anaerolineae	o__Caldilineales	f__Caldilineaceae	g__norank_f__Caldilineaceae	s__unclassified_g__norank_f__Caldilineaceae	OTU1110	0	0	0	0	0	0	0	1	0	0	1
d__Bacteria	k__norank_d__Bacteria	p__Bacteroidota	c__Ignavibacteria	o__Ignavibacteriales	f__PHOS-HE36	g__norank_f__PHOS-HE36	s__uncultured_bacterium_g__norank_f__PHOS-HE36	OTU687	1	0	0	0	0	0	0	0	0	0	1
d__Bacteria	k__norank_d__Bacteria	p__Patescibacteria	c__Saccharimonadia	o__Saccharimonadales	f__LWQ8	g__norank_f__LWQ8	s__uncultured_bacterium_g__norank_f__LWQ8	OTU828	0	0	0	0	0	0	1	0	0	0	1
d__Bacteria	k__norank_d__Bacteria	p__Firmicutes	c__Bacilli	o__Bacillales	f__Planococcaceae	g__Chryseomicrobium	s__uncultured_bacterium_g__Chryseomicrobium	OTU899	1	0	63	43	6	0	5	51	4	9	182
d__Bacteria	k__norank_d__Bacteria	p__Chloroflexi	c__Anaerolineae	o__unclassified_c__Anaerolineae	f__unclassified_c__Anaerolineae	g__unclassified_c__Anaerolineae	s__unclassified_c__Anaerolineae	OTU765	0	1	2	1	1	0	0	1	0	2	8
d__Bacteria	k__norank_d__Bacteria	p__Patescibacteria	c__Saccharimonadia	o__Saccharimonadales	f__norank_o__Saccharimonadales	g__norank_f__norank_o__Saccharimonadales	s__uncultured_bacterium_g__norank_f__norank_o__Saccharimonadales	OTU829	0	0	1	0	0	0	0	1	0	0	2
d__Bacteria	k__norank_d__Bacteria	p__Proteobacteria	c__Gammaproteobacteria	o__Pseudomonadales	f__Moraxellaceae	g__Enhydrobacter	s__Moraxella_osloensis_g__Enhydrobacter	OTU721	0	0	0	0	0	0	0	0	0	1	1
d__Bacteria	k__norank_d__Bacteria	p__Chloroflexi	c__Anaerolineae	o__SBR1031	f__A4b	g__norank_f__A4b	s__unclassified_g__norank_f__A4b	OTU341	1	0	0	0	0	0	0	0	0	0	1
d__Bacteria	k__norank_d__Bacteria	p__Chloroflexi	c__Anaerolineae	o__Anaerolineales	f__Anaerolineaceae	g__norank_f__Anaerolineaceae	s__uncultured_Chloroflexi_bacterium_g__norank_f__Anaerolineaceae	OTU1136	0	0	0	0	0	0	0	1	1	1	3
d__Bacteria	k__norank_d__Bacteria	p__Firmicutes	c__Clostridia	o__Lachnospirales	f__Lachnospiraceae	g__Tyzzerella	s__unclassified_g__Tyzzerella	OTU1028	155	53	25	15	160	25	63	6	219	0	721
d__Bacteria	k__norank_d__Bacteria	p__Proteobacteria	c__Gammaproteobacteria	o__SZB30	f__norank_o__SZB30	g__norank_f__norank_o__SZB30	s__uncultured_bacterium_g__norank_f__norank_o__SZB30	OTU934	1	0	9	7	2	1	1	1	1	10	33
d__Bacteria	k__norank_d__Bacteria	p__Firmicutes	c__Bacilli	o__Mycoplasmatales	f__Mycoplasmataceae	g__norank_f__Mycoplasmataceae	s__uncultured_Firmicutes_bacterium_g__norank_f__Mycoplasmataceae	OTU969	0	0	107	0	76	39	26	373	0	0	621
d__Bacteria	k__norank_d__Bacteria	p__Acidobacteriota	c__Vicinamibacteria	o__Vicinamibacterales	f__norank_o__Vicinamibacterales	g__norank_f__norank_o__Vicinamibacterales	s__uncultured_prokaryote_g__norank_f__norank_o__Vicinamibacterales	OTU93	0	0	1	0	0	0	0	1	0	7	9
d__Bacteria	k__norank_d__Bacteria	p__Cyanobacteria	c__Cyanobacteriia	o__Cyanobacteriales	f__Phormidiaceae	g__Planktothrix_NIVA-CYA_15	s__bacterium_enrichment_culture_clone_B1252011	OTU610	6	0	0	4	5	0	0	0	6	2	23
d__Bacteria	k__norank_d__Bacteria	p__Proteobacteria	c__Alphaproteobacteria	o__Rhizobiales	f__Rhizobiaceae	g__norank_f__Rhizobiaceae	s__metagenome_g__norank_f__Rhizobiaceae	OTU1111	0	1	4	3	1	0	0	0	0	1	10
d__Bacteria	k__norank_d__Bacteria	p__Patescibacteria	c__Saccharimonadia	o__Saccharimonadales	f__unclassified_o__Saccharimonadales	g__unclassified_o__Saccharimonadales	s__unclassified_o__Saccharimonadales	OTU89	0	0	1	5	0	0	0	0	0	0	6
d__Bacteria	k__norank_d__Bacteria	p__Patescibacteria	c__Saccharimonadia	o__Saccharimonadales	f__unclassified_o__Saccharimonadales	g__unclassified_o__Saccharimonadales	s__unclassified_o__Saccharimonadales	OTU548	16	8	2	60	9	2	3	6	0	0	106
d__Bacteria	k__norank_d__Bacteria	p__Proteobacteria	c__Gammaproteobacteria	o__Xanthomonadales	f__Xanthomonadaceae	g__Thermomonas	s__uncultured_bacterium_g__Thermomonas	OTU807	0	0	2	0	0	0	0	0	0	0	2
d__Bacteria	k__norank_d__Bacteria	p__Proteobacteria	c__Gammaproteobacteria	o__Burkholderiales	f__SC-I-84	g__norank_f__SC-I-84	s__unclassified_g__norank_f__SC-I-84	OTU1003	0	0	0	0	1	0	0	0	0	0	1
d__Bacteria	k__norank_d__Bacteria	p__Firmicutes	c__Clostridia	o__Peptostreptococcales-Tissierellales	f__Peptostreptococcaceae	g__Proteocatella	s__uncultured_bacterium_g__Proteocatella	OTU113	0	0	0	0	0	0	0	1	0	0	1
d__Bacteria	k__norank_d__Bacteria	p__Proteobacteria	c__Gammaproteobacteria	o__Methylococcales	f__Methylomonadaceae	g__Crenothrix	s__uncultured_bacterium_g__Crenothrix	OTU245	0	0	1	0	0	0	0	0	0	0	1
d__Bacteria	k__norank_d__Bacteria	p__Proteobacteria	c__Gammaproteobacteria	o__Coxiellales	f__Coxiellaceae	g__Coxiella	s__bacterium_enrichment_culture_clone_B2042011	OTU625	1	2	0	3	0	0	0	0	0	0	6
d__Bacteria	k__norank_d__Bacteria	p__Cyanobacteria	c__Cyanobacteriia	o__Chloroplast	f__norank_o__Chloroplast	g__norank_f__norank_o__Chloroplast	s__Trachydiscus_minutus	OTU749	8	1	0	25	5	0	0	1	12	5	57
d__Bacteria	k__norank_d__Bacteria	p__Actinobacteriota	c__Actinobacteria	o__PeM15	f__norank_o__PeM15	g__norank_f__norank_o__PeM15	s__uncultured_soil_bacterium_g__norank_f__norank_o__PeM15	OTU453	2	0	4	3	4	0	0	0	0	2	15
d__Bacteria	k__norank_d__Bacteria	p__Desulfobacterota	c__Syntrophobacteria	o__Syntrophobacterales	f__norank_o__Syntrophobacterales	g__norank_f__norank_o__Syntrophobacterales	s__uncultured_bacterium_g__norank_f__norank_o__Syntrophobacterales	OTU135	0	2	1	0	0	0	0	0	0	2	5
d__Bacteria	k__norank_d__Bacteria	p__Patescibacteria	c__Saccharimonadia	o__Saccharimonadales	f__Saccharimonadaceae	g__TM7a	s__uncultured_bacterium_g__TM7a	OTU718	0	0	0	2	0	0	0	0	0	0	2
d__Bacteria	k__norank_d__Bacteria	p__Patescibacteria	c__WWE3	o__norank_c__WWE3	f__norank_o__norank_c__WWE3	g__norank_f__norank_o__norank_c__WWE3	s__unclassified_g__norank_f__norank_o__norank_c__WWE3	OTU1090	0	0	0	0	0	0	0	0	1	1	2
d__Bacteria	k__norank_d__Bacteria	p__Patescibacteria	c__Dojkabacteria	o__norank_c__Dojkabacteria	f__norank_o__norank_c__Dojkabacteria	g__norank_f__norank_o__norank_c__Dojkabacteria	s__uncultured_prokaryote_g__norank_f__norank_o__norank_c__Dojkabacteria	OTU1023	0	1	0	0	0	0	0	0	0	0	1
d__Bacteria	k__norank_d__Bacteria	p__Actinobacteriota	c__Actinobacteria	o__Propionibacteriales	f__Nocardioidaceae	g__Marmoricola	s__uncultured_bacterium_g__Marmoricola	OTU750	0	0	0	1	0	0	0	0	0	0	1
d__Bacteria	k__norank_d__Bacteria	p__Proteobacteria	c__Gammaproteobacteria	o__Alteromonadales	f__Alteromonadaceae	g__Rheinheimera	s__uncultured_bacterium_g__Rheinheimera	OTU434	0	2	0	0	0	0	0	0	0	0	2
d__Bacteria	k__norank_d__Bacteria	p__Modulibacteria	c__Moduliflexia	o__Moduliflexales	f__Moduliflexaceae	g__norank_f__Moduliflexaceae	s__uncultured_bacterium_g__norank_f__Moduliflexaceae	OTU901	0	0	0	0	0	0	1	0	0	0	1
d__Bacteria	k__norank_d__Bacteria	p__Actinobacteriota	c__Acidimicrobiia	o__Microtrichales	f__Microtrichaceae	g__norank_f__Microtrichaceae	s__unclassified_g__norank_f__Microtrichaceae	OTU71	0	1	0	2	0	0	0	0	0	0	3
d__Bacteria	k__norank_d__Bacteria	p__Actinobacteriota	c__Actinobacteria	o__Frankiales	f__Acidothermaceae	g__Acidothermus	s__unclassified_g__Acidothermus	OTU405	0	0	0	0	0	0	0	0	0	1	1
d__Bacteria	k__norank_d__Bacteria	p__Firmicutes	c__Bacilli	o__Mycoplasmatales	f__Mycoplasmataceae	g__Candidatus_Bacilloplasma	s__uncultured_bacterium_g__Candidatus_Bacilloplasma	OTU1050	3129	4595	3430	3949	3503	5014	834	4824	7000	1513	37791
d__Bacteria	k__norank_d__Bacteria	p__Firmicutes	c__Bacilli	o__Erysipelotrichales	f__Erysipelotrichaceae	g__unclassified_f__Erysipelotrichaceae	s__unclassified_f__Erysipelotrichaceae	OTU1076	0	0	0	0	0	0	0	0	0	1	1
d__Bacteria	k__norank_d__Bacteria	p__Cyanobacteria	c__Cyanobacteriia	o__Chloroplast	f__norank_o__Chloroplast	g__norank_f__norank_o__Chloroplast	s__Tetradesmus_obliquus	OTU481	0	0	2	2	0	0	0	0	1	0	5
d__Bacteria	k__norank_d__Bacteria	p__Bacteroidota	c__Bacteroidia	o__Bacteroidales	f__Tannerellaceae	g__Parabacteroides	s__unclassified_g__Parabacteroides	OTU1083	23	765	992	18	789	289	22	535	339	11412	15184
d__Bacteria	k__norank_d__Bacteria	p__Bacteroidota	c__unclassified_p__Bacteroidota	o__unclassified_p__Bacteroidota	f__unclassified_p__Bacteroidota	g__unclassified_p__Bacteroidota	s__unclassified_p__Bacteroidota	OTU938	0	0	0	0	0	0	0	0	0	1	1
d__Bacteria	k__norank_d__Bacteria	p__Patescibacteria	c__Saccharimonadia	o__Saccharimonadales	f__norank_o__Saccharimonadales	g__norank_f__norank_o__Saccharimonadales	s__uncultured_bacterium_g__norank_f__norank_o__Saccharimonadales	OTU552	0	0	0	2	0	0	0	0	0	0	2
d__Bacteria	k__norank_d__Bacteria	p__Proteobacteria	c__Gammaproteobacteria	o__norank_c__Gammaproteobacteria	f__norank_o__norank_c__Gammaproteobacteria	g__norank_f__norank_o__norank_c__Gammaproteobacteria	s__uncultured_organism_g__norank_f__norank_o__norank_c__Gammaproteobacteria	OTU41	0	0	0	0	0	0	0	1	0	0	1
d__Bacteria	k__norank_d__Bacteria	p__Chloroflexi	c__Anaerolineae	o__Caldilineales	f__Caldilineaceae	g__norank_f__Caldilineaceae	s__uncultured_bacterium_g__norank_f__Caldilineaceae	OTU1123	0	0	0	1	0	0	0	0	0	2	3
d__Bacteria	k__norank_d__Bacteria	p__Bacteroidota	c__Bacteroidia	o__Chitinophagales	f__Chitinophagaceae	g__unclassified_f__Chitinophagaceae	s__unclassified_f__Chitinophagaceae	OTU816	0	0	3	0	0	0	0	0	0	0	3
d__Bacteria	k__norank_d__Bacteria	p__Firmicutes	c__Bacilli	o__Mycoplasmatales	f__Mycoplasmataceae	g__Candidatus_Bacilloplasma	s__uncultured_bacterium_g__Candidatus_Bacilloplasma	OTU554	10089	2378	1129	5209	3619	2723	880	5056	1351	7589	40023
d__Bacteria	k__norank_d__Bacteria	p__Actinobacteriota	c__Actinobacteria	o__Micrococcales	f__Micrococcaceae	g__Glutamicibacter	s__unclassified_g__Glutamicibacter	OTU479	2	0	24	8	0	0	0	5	2	2	43
d__Bacteria	k__norank_d__Bacteria	p__Bacteroidota	c__Bacteroidia	o__Bacteroidales	f__Dysgonomonadaceae	g__Dysgonomonas	s__unclassified_g__Dysgonomonas	OTU44	1684	1217	0	46	355	311	123	650	317	195	4898
d__Bacteria	k__norank_d__Bacteria	p__Acidobacteriota	c__Thermoanaerobaculia	o__Thermoanaerobaculales	f__Thermoanaerobaculaceae	g__Subgroup_23	s__uncultured_prokaryote_g__Subgroup_23	OTU265	0	0	0	1	0	0	0	0	0	0	1
d__Bacteria	k__norank_d__Bacteria	p__Patescibacteria	c__Microgenomatia	o__Candidatus_Roizmanbacteria	f__norank_o__Candidatus_Roizmanbacteria	g__norank_f__norank_o__Candidatus_Roizmanbacteria	s__Candidatus_Roizmanbacteria_bacterium_RIFOXYD1_FULL_41_24	OTU130	0	0	0	1	0	0	0	0	0	0	1
d__Bacteria	k__norank_d__Bacteria	p__Firmicutes	c__Clostridia	o__Clostridiales	f__Clostridiaceae	g__Clostridium_sensu_stricto_1	s__Clostridium_beijerinckii	OTU897	0	0	1	3	0	0	2	0	0	0	6
d__Bacteria	k__norank_d__Bacteria	p__Firmicutes	c__Bacilli	o__Erysipelotrichales	f__Erysipelotrichaceae	g__Turicibacter	s__uncultured_bacterium_g__Turicibacter	OTU82	0	0	0	4	0	0	0	0	0	1	5
d__Bacteria	k__norank_d__Bacteria	p__Firmicutes	c__Bacilli	o__Mycoplasmatales	f__Mycoplasmataceae	g__Candidatus_Bacilloplasma	s__uncultured_Firmicutes_bacterium_g__Candidatus_Bacilloplasma	OTU893	4	3	1	4	1	1	0	0	0	0	14
d__Bacteria	k__norank_d__Bacteria	p__Actinobacteriota	c__Actinobacteria	o__Propionibacteriales	f__Nocardioidaceae	g__Nocardioides	s__unclassified_g__Nocardioides	OTU855	0	1	0	0	0	0	0	0	0	1	2
d__Bacteria	k__norank_d__Bacteria	p__Proteobacteria	c__Gammaproteobacteria	o__Enterobacterales	f__Budviciaceae	g__Pragia	s__bacterium_TSA241-4	OTU1073	636	4290	1649	188	875	14	43	1168	143	223	9229
d__Bacteria	k__norank_d__Bacteria	p__Deinococcota	c__Deinococci	o__Thermales	f__Thermaceae	g__Meiothermus	s__uncultured_bacterium_g__Meiothermus	OTU1091	0	0	0	0	0	0	0	0	0	8	8
d__Bacteria	k__norank_d__Bacteria	p__Proteobacteria	c__Alphaproteobacteria	o__Rhizobiales	f__Rhizobiaceae	g__Aminobacter	s__unclassified_g__Aminobacter	OTU654	0	2	1	0	0	0	0	0	0	0	3
d__Bacteria	k__norank_d__Bacteria	p__Bacteroidota	c__Bacteroidia	o__Bacteroidales	f__Paludibacteraceae	g__Paludibacter	s__uncultured_bacterium_g__Paludibacter	OTU847	0	0	0	0	0	2	0	0	0	0	2
d__Bacteria	k__norank_d__Bacteria	p__Verrucomicrobiota	c__Verrucomicrobiae	o__Verrucomicrobiales	f__Rubritaleaceae	g__norank_f__Rubritaleaceae	s__uncultured_bacterium_g__norank_f__Rubritaleaceae	OTU226	0	0	1	0	0	0	0	0	0	0	1
d__Bacteria	k__norank_d__Bacteria	p__Proteobacteria	c__Gammaproteobacteria	o__Xanthomonadales	f__Xanthomonadaceae	g__Pseudoxanthomonas	s__Pseudoxanthomonas_mexicana	OTU466	0	0	5	0	0	0	0	1	0	0	6
d__Bacteria	k__norank_d__Bacteria	p__Bacteroidota	c__Kapabacteria	o__Kapabacteriales	f__norank_o__Kapabacteriales	g__norank_f__norank_o__Kapabacteriales	s__unclassified_g__norank_f__norank_o__Kapabacteriales	OTU577	1	0	0	0	0	0	0	0	0	0	1
d__Bacteria	k__norank_d__Bacteria	p__Proteobacteria	c__Gammaproteobacteria	o__Xanthomonadales	f__Xanthomonadaceae	g__Arenimonas	s__unclassified_g__Arenimonas	OTU926	0	0	1	0	0	0	0	0	0	0	1
d__Bacteria	k__norank_d__Bacteria	p__Chloroflexi	c__KD4-96	o__norank_c__KD4-96	f__norank_o__norank_c__KD4-96	g__norank_f__norank_o__norank_c__KD4-96	s__uncultured_bacterium_g__norank_f__norank_o__norank_c__KD4-96	OTU549	0	0	1	4	0	0	0	0	0	0	5
d__Bacteria	k__norank_d__Bacteria	p__Patescibacteria	c__Saccharimonadia	o__Saccharimonadales	f__LWQ8	g__norank_f__LWQ8	s__uncultured_bacterium_g__norank_f__LWQ8	OTU1155	1	0	1	0	0	0	0	0	0	0	2
d__Bacteria	k__norank_d__Bacteria	p__Bacteroidota	c__Bacteroidia	o__Chitinophagales	f__Chitinophagaceae	g__Terrimonas	s__uncultured_bacterium_g__Terrimonas	OTU493	0	0	11	0	0	0	0	0	0	2	13
d__Bacteria	k__norank_d__Bacteria	p__Actinobacteriota	c__Thermoleophilia	o__Gaiellales	f__norank_o__Gaiellales	g__norank_f__norank_o__Gaiellales	s__unclassified_g__norank_f__norank_o__Gaiellales	OTU249	0	0	1	3	0	0	1	0	0	0	5
d__Bacteria	k__norank_d__Bacteria	p__Modulibacteria	c__Moduliflexia	o__Moduliflexales	f__Moduliflexaceae	g__norank_f__Moduliflexaceae	s__unclassified_g__norank_f__Moduliflexaceae	OTU1072	0	0	0	0	0	0	0	1	0	3	4
d__Bacteria	k__norank_d__Bacteria	p__Actinobacteriota	c__Acidimicrobiia	o__Microtrichales	f__Ilumatobacteraceae	g__norank_f__Ilumatobacteraceae	s__uncultured_bacterium_g__norank_f__Ilumatobacteraceae	OTU339	0	0	3	0	0	0	0	0	0	0	3
d__Bacteria	k__norank_d__Bacteria	p__Proteobacteria	c__Gammaproteobacteria	o__Legionellales	f__Legionellaceae	g__Legionella	s__unclassified_g__Legionella	OTU682	0	1	1	0	0	0	0	0	0	0	2
d__Bacteria	k__norank_d__Bacteria	p__Proteobacteria	c__Gammaproteobacteria	o__Chromatiales	f__Chromatiaceae	g__unclassified_f__Chromatiaceae	s__unclassified_f__Chromatiaceae	OTU987	0	0	0	1	0	0	0	0	0	0	1
d__Bacteria	k__norank_d__Bacteria	p__Firmicutes	c__Bacilli	o__Bacillales	f__Bacillaceae	g__Bacillus	s__Bacillus_aquimaris	OTU734	0	0	5	8	1	0	1	0	0	3	18
d__Bacteria	k__norank_d__Bacteria	p__Cyanobacteria	c__Cyanobacteriia	o__Synechococcales	f__Cyanobiaceae	g__Synechococcus_CC9902	s__unclassified_g__Synechococcus_CC9902	OTU509	0	0	0	1	0	0	0	0	0	0	1
d__Bacteria	k__norank_d__Bacteria	p__Chloroflexi	c__Chloroflexia	o__Chloroflexales	f__Roseiflexaceae	g__norank_f__Roseiflexaceae	s__unclassified_g__norank_f__Roseiflexaceae	OTU386	0	0	0	0	0	0	0	1	0	0	1
d__Bacteria	k__norank_d__Bacteria	p__Proteobacteria	c__Gammaproteobacteria	o__Methylococcales	f__Methylomonadaceae	g__Crenothrix	s__unclassified_g__Crenothrix	OTU769	0	0	27	1	0	0	0	0	0	1	29
d__Bacteria	k__norank_d__Bacteria	p__Proteobacteria	c__Gammaproteobacteria	o__Enterobacterales	f__Morganellaceae	g__Morganella	s__Morganella_morganii	OTU423	0	3023	0	0	0	0	0	0	0	0	3023
d__Bacteria	k__norank_d__Bacteria	p__Actinobacteriota	c__Thermoleophilia	o__Gaiellales	f__norank_o__Gaiellales	g__norank_f__norank_o__Gaiellales	s__metagenome_g__norank_f__norank_o__Gaiellales	OTU1167	0	0	0	1	0	0	0	0	0	0	1
d__Bacteria	k__norank_d__Bacteria	p__Dependentiae	c__Babeliae	o__Babeliales	f__Vermiphilaceae	g__norank_f__Vermiphilaceae	s__uncultured_bacterium_g__norank_f__Vermiphilaceae	OTU726	0	0	0	1	0	0	0	0	0	0	1
d__Bacteria	k__norank_d__Bacteria	p__Verrucomicrobiota	c__Verrucomicrobiae	o__Verrucomicrobiales	f__Rubritaleaceae	g__Luteolibacter	s__uncultured_bacterium_g__Luteolibacter	OTU859	0	0	0	1	1	0	0	0	0	0	2
d__Bacteria	k__norank_d__Bacteria	p__Chloroflexi	c__Anaerolineae	o__Anaerolineales	f__Anaerolineaceae	g__norank_f__Anaerolineaceae	s__uncultured_Chloroflexi_bacterium_g__norank_f__Anaerolineaceae	OTU438	0	0	0	0	0	0	0	0	0	1	1
d__Bacteria	k__norank_d__Bacteria	p__Bacteroidota	c__Bacteroidia	o__Flavobacteriales	f__Crocinitomicaceae	g__Fluviicola	s__uncultured_bacterium_g__Fluviicola	OTU1074	0	0	0	0	0	0	0	0	0	1	1
d__Bacteria	k__norank_d__Bacteria	p__Patescibacteria	c__Saccharimonadia	o__Saccharimonadales	f__norank_o__Saccharimonadales	g__norank_f__norank_o__Saccharimonadales	s__metagenome_g__norank_f__norank_o__Saccharimonadales	OTU1146	0	3	0	4	0	0	2	1	0	0	10
d__Bacteria	k__norank_d__Bacteria	p__Proteobacteria	c__Gammaproteobacteria	o__Coxiellales	f__Coxiellaceae	g__Coxiella	s__unclassified_g__Coxiella	OTU72	0	0	0	0	0	0	0	0	1	0	1
d__Bacteria	k__norank_d__Bacteria	p__Chloroflexi	c__Anaerolineae	o__Caldilineales	f__Caldilineaceae	g__norank_f__Caldilineaceae	s__uncultured_bacterium_g__norank_f__Caldilineaceae	OTU1125	0	0	0	0	0	0	0	0	0	3	3
d__Bacteria	k__norank_d__Bacteria	p__Proteobacteria	c__Alphaproteobacteria	o__Rhizobiales	f__Hyphomicrobiaceae	g__norank_f__Hyphomicrobiaceae	s__metagenome_g__norank_f__Hyphomicrobiaceae	OTU1004	0	1	0	1	0	0	0	0	0	0	2
d__Bacteria	k__norank_d__Bacteria	p__Chloroflexi	c__Chloroflexia	o__Chloroflexales	f__Chloroflexaceae	g__Chloronema	s__uncultured_bacterium_g__Chloronema	OTU1053	0	0	0	0	0	0	0	0	1	0	1
d__Bacteria	k__norank_d__Bacteria	p__Chloroflexi	c__Anaerolineae	o__1-20	f__norank_o__1-20	g__norank_f__norank_o__1-20	s__uncultured_Chloroflexia_bacterium_g__norank_f__norank	OTU1086	0	0	2	0	0	0	0	0	0	1	3
d__Bacteria	k__norank_d__Bacteria	p__Desulfobacterota	c__Desulfobulbia	o__Desulfobulbales	f__Desulfocapsaceae	g__norank_f__Desulfocapsaceae	s__unclassified_g__norank_f__Desulfocapsaceae	OTU150	0	0	1	0	0	0	0	0	0	1	2
d__Bacteria	k__norank_d__Bacteria	p__Firmicutes	c__Bacilli	o__Mycoplasmatales	f__Mycoplasmataceae	g__norank_f__Mycoplasmataceae	s__uncultured_Firmicutes_bacterium_g__norank_f__Mycoplasmataceae	OTU67	113	74	271	703	122	125	37	467	46	0	1958
d__Bacteria	k__norank_d__Bacteria	p__Cyanobacteria	c__Cyanobacteriia	o__Chloroplast	f__norank_o__Chloroplast	g__norank_f__norank_o__Chloroplast	s__Nannochloropsis_gaditana_g__norank	OTU1109	8	1	7	11	9	0	0	0	6	5	47
d__Bacteria	k__norank_d__Bacteria	p__Actinobacteriota	c__Thermoleophilia	o__Solirubrobacterales	f__67-14	g__norank_f__67-14	s__unclassified_g__norank_f__67-14	OTU928	1	0	1	9	0	0	1	0	1	1	14
d__Bacteria	k__norank_d__Bacteria	p__Firmicutes	c__Bacilli	o__Erysipelotrichales	f__Erysipelatoclostridiaceae	g__Coprobacillus	s__uncultured_bacterium_g__Coprobacillus	OTU886	343	765	267	212	605	377	123	648	1216	225	4781
d__Bacteria	k__norank_d__Bacteria	p__Proteobacteria	c__Alphaproteobacteria	o__Sphingomonadales	f__Sphingomonadaceae	g__unclassified_f__Sphingomonadaceae	s__unclassified_f__Sphingomonadaceae	OTU600	8	39	20	101	15	1	4	8	0	1	197
d__Bacteria	k__norank_d__Bacteria	p__Firmicutes	c__Bacilli	o__Erysipelotrichales	f__Erysipelotrichaceae	g__Erysipelothrix	s__uncultured_low_GC_Gram-positive_bacterium_g__Erysipelothrix	OTU632	1	0	0	0	0	0	0	1	0	0	2
d__Bacteria	k__norank_d__Bacteria	p__Patescibacteria	c__Saccharimonadia	o__Saccharimonadales	f__norank_o__Saccharimonadales	g__norank_f__norank_o__Saccharimonadales	s__uncultured_bacterium_g__norank_f__norank_o__Saccharimonadales	OTU879	0	0	0	1	0	0	0	0	0	0	1
d__Bacteria	k__norank_d__Bacteria	p__Bacteroidota	c__Bacteroidia	o__Bacteroidales	f__Bacteroidetes_vadinHA17	g__norank_f__Bacteroidetes_vadinHA17	s__unclassified_g__norank_f__Bacteroidetes_vadinHA17	OTU630	0	0	0	0	0	0	0	0	0	1	1
d__Bacteria	k__norank_d__Bacteria	p__Actinobacteriota	c__Actinobacteria	o__Propionibacteriales	f__Propionibacteriaceae	g__Propioniciclava	s__unclassified_g__Propioniciclava	OTU780	0	1	0	0	0	0	0	0	0	0	1
d__Bacteria	k__norank_d__Bacteria	p__Patescibacteria	c__Saccharimonadia	o__Saccharimonadales	f__Saccharimonadaceae	g__TM7a	s__uncultured_bacterium_g__TM7a	OTU568	0	2	2	8	0	0	0	0	0	0	12
d__Bacteria	k__norank_d__Bacteria	p__Proteobacteria	c__Gammaproteobacteria	o__Alteromonadales	f__Shewanellaceae	g__Shewanella	s__Shewanella_bicestrii	OTU849	21	3	1	1	0	40	23	106	0	3	198
d__Bacteria	k__norank_d__Bacteria	p__Verrucomicrobiota	c__Verrucomicrobiae	o__Verrucomicrobiales	f__Rubritaleaceae	g__Luteolibacter	s__unclassified_g__Luteolibacter	OTU640	0	0	1	0	1	0	0	0	0	2	4
d__Bacteria	k__norank_d__Bacteria	p__Bacteroidota	c__Bacteroidia	o__Chitinophagales	f__Saprospiraceae	g__norank_f__Saprospiraceae	s__uncultured_bacterium_g__norank_f__Saprospiraceae	OTU561	0	0	1	0	0	0	0	0	0	5	6
d__Bacteria	k__norank_d__Bacteria	p__Chloroflexi	c__Anaerolineae	o__Caldilineales	f__Caldilineaceae	g__norank_f__Caldilineaceae	s__uncultured_Chloroflexi_bacterium_g__norank_f__Caldilineaceae	OTU75	0	0	0	2	0	0	0	0	0	0	2
d__Bacteria	k__norank_d__Bacteria	p__Cyanobacteria	c__Cyanobacteriia	o__Chloroplast	f__norank_o__Chloroplast	g__norank_f__norank_o__Chloroplast	s__Oscillatoriales_cyanobacterium_HF1	OTU63	1	0	0	0	0	0	0	0	0	0	1
d__Bacteria	k__norank_d__Bacteria	p__Proteobacteria	c__Alphaproteobacteria	o__Rhizobiales	f__Hyphomicrobiaceae	g__Hyphomicrobium	s__unclassified_g__Hyphomicrobium	OTU875	0	0	1	0	0	0	0	0	0	0	1
d__Bacteria	k__norank_d__Bacteria	p__Actinobacteriota	c__Actinobacteria	o__Propionibacteriales	f__Nocardioidaceae	g__Nocardioides	s__Nocardioides_sp._g__Nocardioides	OTU920	1	0	4	3	0	0	0	2	0	0	10
d__Bacteria	k__norank_d__Bacteria	p__Actinobacteriota	c__Coriobacteriia	o__OPB41	f__norank_o__OPB41	g__norank_f__norank_o__OPB41	s__uncultured_bacterium_g__norank_f__norank_o__OPB41	OTU98	0	0	0	7	1	0	0	0	0	0	8
d__Bacteria	k__norank_d__Bacteria	p__Proteobacteria	c__Gammaproteobacteria	o__Burkholderiales	f__SC-I-84	g__norank_f__SC-I-84	s__uncultured_bacterium_g__norank_f__SC-I-84	OTU51	1	0	1	0	0	0	0	0	0	0	2
d__Bacteria	k__norank_d__Bacteria	p__Patescibacteria	c__WWE3	o__norank_c__WWE3	f__norank_o__norank_c__WWE3	g__norank_f__norank_o__norank_c__WWE3	s__unclassified_g__norank_f__norank_o__norank_c__WWE3	OTU451	0	0	1	0	0	0	0	1	0	0	2
d__Bacteria	k__norank_d__Bacteria	p__Actinobacteriota	c__Thermoleophilia	o__Gaiellales	f__norank_o__Gaiellales	g__norank_f__norank_o__Gaiellales	s__metagenome_g__norank_f__norank_o__Gaiellales	OTU276	0	0	2	1	0	0	0	0	0	0	3
d__Bacteria	k__norank_d__Bacteria	p__Actinobacteriota	c__Acidimicrobiia	o__Microtrichales	f__Ilumatobacteraceae	g__Ilumatobacter	s__unclassified_g__Ilumatobacter	OTU604	0	1	0	29	3	0	1	1	0	2	37
d__Bacteria	k__norank_d__Bacteria	p__Cyanobacteria	c__Cyanobacteriia	o__Chloroplast	f__norank_o__Chloroplast	g__norank_f__norank_o__Chloroplast	s__unclassified_g__norank_f__norank_o__Chloroplast	OTU1162	0	0	1	0	0	0	0	0	0	0	1
d__Bacteria	k__norank_d__Bacteria	p__Chloroflexi	c__Chloroflexia	o__Chloroflexales	f__Roseiflexaceae	g__Kouleothrix	s__uncultured_bacterium_g__Kouleothrix	OTU1108	2	0	0	0	0	0	0	0	0	1	3
d__Bacteria	k__norank_d__Bacteria	p__Proteobacteria	c__Alphaproteobacteria	o__Rhodobacterales	f__Rhodobacteraceae	g__unclassified_f__Rhodobacteraceae	s__unclassified_f__Rhodobacteraceae	OTU967	11	17	12	37	21	11	2	10	0	7	128
d__Bacteria	k__norank_d__Bacteria	p__Patescibacteria	c__Saccharimonadia	o__Saccharimonadales	f__norank_o__Saccharimonadales	g__norank_f__norank_o__Saccharimonadales	s__uncultured_Candidatus_Saccharibacteria_bacterium_g__norank_f__norank	OTU708	0	0	0	0	0	0	11	0	0	8	19
d__Bacteria	k__norank_d__Bacteria	p__Chloroflexi	c__Anaerolineae	o__unclassified_c__Anaerolineae	f__unclassified_c__Anaerolineae	g__unclassified_c__Anaerolineae	s__unclassified_c__Anaerolineae	OTU1087	0	0	0	0	0	0	0	0	0	1	1
d__Bacteria	k__norank_d__Bacteria	p__Proteobacteria	c__Gammaproteobacteria	o__Pseudomonadales	f__Moraxellaceae	g__Acinetobacter	s__unclassified_g__Acinetobacter	OTU939	0	1	0	0	10	0	0	0	0	0	11
d__Bacteria	k__norank_d__Bacteria	p__Proteobacteria	c__Gammaproteobacteria	o__Methylococcales	f__Methylomonadaceae	g__unclassified_f__Methylomonadaceae	s__unclassified_f__Methylomonadaceae	OTU931	1	0	0	0	0	0	0	0	0	3	4
d__Bacteria	k__norank_d__Bacteria	p__Chloroflexi	c__Anaerolineae	o__Anaerolineales	f__Anaerolineaceae	g__norank_f__Anaerolineaceae	s__uncultured_Chloroflexi_bacterium_g__norank_f__Anaerolineaceae	OTU756	1	0	1	0	1	0	0	0	1	1	5
d__Bacteria	k__norank_d__Bacteria	p__Chloroflexi	c__Anaerolineae	o__Anaerolineales	f__Anaerolineaceae	g__norank_f__Anaerolineaceae	s__uncultured_Anaerolineaceae_bacterium_g__norank_f__Anaerolineaceae	OTU596	1	0	1	3	2	0	1	0	0	3	11
d__Bacteria	k__norank_d__Bacteria	p__Cyanobacteria	c__Cyanobacteriia	o__Chloroplast	f__norank_o__Chloroplast	g__norank_f__norank_o__Chloroplast	s__uncultured_bacterium_g__norank_f__norank_o__Chloroplast	OTU631	0	0	0	1	0	0	0	0	0	0	1
d__Bacteria	k__norank_d__Bacteria	p__Firmicutes	c__Clostridia	o__Clostridiales	f__Clostridiaceae	g__Clostridium_sensu_stricto_6	s__Clostridium_bornimense	OTU5	0	0	0	1	0	0	0	0	0	0	1
d__Bacteria	k__norank_d__Bacteria	p__Patescibacteria	c__Saccharimonadia	o__Saccharimonadales	f__norank_o__Saccharimonadales	g__norank_f__norank_o__Saccharimonadales	s__unclassified_g__norank_f__norank_o__Saccharimonadales	OTU518	0	1	0	8	0	0	0	0	0	0	9
d__Bacteria	k__norank_d__Bacteria	p__Proteobacteria	c__Alphaproteobacteria	o__Rhizobiales	f__Rhizobiales_Incertae_Sedis	g__Phreatobacter	s__unclassified_g__Phreatobacter	OTU78	0	1	1	1	0	0	0	0	0	0	3
d__Bacteria	k__norank_d__Bacteria	p__Fusobacteriota	c__Fusobacteriia	o__Fusobacteriales	f__Leptotrichiaceae	g__unclassified_f__Leptotrichiaceae	s__unclassified_f__Leptotrichiaceae	OTU83	22	0	1	4	18	0	0	1	18	1	65
d__Bacteria	k__norank_d__Bacteria	p__Firmicutes	c__Clostridia	o__Peptostreptococcales-Tissierellales	f__Anaerovoracaceae	g__Eubacterium_brachy_group	s__uncultured_bacterium_g__Eubacterium_brachy_group	OTU199	30	1377	2920	157	463	155	3	957	117	1158	7337
d__Bacteria	k__norank_d__Bacteria	p__Acidobacteriota	c__Blastocatellia	o__Blastocatellales	f__Blastocatellaceae	g__norank_f__Blastocatellaceae	s__uncultured_bacterium_g__norank_f__Blastocatellaceae	OTU229	1	0	0	0	0	0	0	0	0	0	1
d__Bacteria	k__norank_d__Bacteria	p__Firmicutes	c__Bacilli	o__Bacillales	f__Planococcaceae	g__Lysinibacillus	s__unclassified_g__Lysinibacillus	OTU183	0	0	1	0	0	0	0	1	0	0	2
d__Bacteria	k__norank_d__Bacteria	p__Actinobacteriota	c__Acidimicrobiia	o__unclassified_c__Acidimicrobiia	f__unclassified_c__Acidimicrobiia	g__unclassified_c__Acidimicrobiia	s__unclassified_c__Acidimicrobiia	OTU601	0	1	0	0	1	0	1	0	0	0	3
d__Bacteria	k__norank_d__Bacteria	p__Proteobacteria	c__Gammaproteobacteria	o__Legionellales	f__Legionellaceae	g__Legionella	s__uncultured_bacterium_g__Legionella	OTU684	1	0	0	0	0	0	0	0	0	0	1
d__Bacteria	k__norank_d__Bacteria	p__Acidobacteriota	c__Vicinamibacteria	o__Subgroup_17	f__norank_o__Subgroup_17	g__norank_f__norank_o__Subgroup_17	s__uncultured_soil_bacterium_g__norank_f__norank_o__Subgroup_17	OTU31	0	0	0	0	0	0	0	1	0	0	1
d__Bacteria	k__norank_d__Bacteria	p__Firmicutes	c__Bacilli	o__Mycoplasmatales	f__Mycoplasmataceae	g__Candidatus_Bacilloplasma	s__uncultured_bacterium_g__Candidatus_Bacilloplasma	OTU510	3476	34	1010	5101	1534	4762	954	3814	949	7666	29300
d__Bacteria	k__norank_d__Bacteria	p__Bacteroidota	c__Bacteroidia	o__Chitinophagales	f__norank_o__Chitinophagales	g__norank_f__norank_o__Chitinophagales	s__uncultured_Cytophagales_bacterium_g__norank_f__norank	OTU536	0	0	2	13	1	0	0	0	0	0	16
d__Bacteria	k__norank_d__Bacteria	p__Actinobacteriota	c__Thermoleophilia	o__Gaiellales	f__norank_o__Gaiellales	g__norank_f__norank_o__Gaiellales	s__metagenome_g__norank_f__norank_o__Gaiellales	OTU929	1	0	0	6	2	0	0	0	2	0	11
d__Bacteria	k__norank_d__Bacteria	p__Chloroflexi	c__Anaerolineae	o__SJA-15	f__norank_o__SJA-15	g__norank_f__norank_o__SJA-15	s__uncultured_bacterium_g__norank_f__norank_o__SJA-15	OTU112	2	0	1	3	0	0	0	0	0	1	7
d__Bacteria	k__norank_d__Bacteria	p__Actinobacteriota	c__Acidimicrobiia	o__Microtrichales	f__norank_o__Microtrichales	g__norank_f__norank_o__Microtrichales	s__metagenome_g__norank_f__norank_o__Microtrichales	OTU508	0	0	0	4	2	0	1	0	0	1	8
d__Bacteria	k__norank_d__Bacteria	p__Proteobacteria	c__Gammaproteobacteria	o__Burkholderiales	f__unclassified_o__Burkholderiales	g__unclassified_o__Burkholderiales	s__unclassified_o__Burkholderiales	OTU228	0	0	2	0	0	0	0	0	0	0	2
d__Bacteria	k__norank_d__Bacteria	p__Bacteroidota	c__Bacteroidia	o__Chitinophagales	f__Saprospiraceae	g__norank_f__Saprospiraceae	s__unclassified_g__norank_f__Saprospiraceae	OTU913	0	0	0	0	0	0	0	1	0	0	1
d__Bacteria	k__norank_d__Bacteria	p__Bacteroidota	c__Bacteroidia	o__Chitinophagales	f__Saprospiraceae	g__norank_f__Saprospiraceae	s__unclassified_g__norank_f__Saprospiraceae	OTU918	0	0	0	0	0	0	0	0	0	1	1
d__Bacteria	k__norank_d__Bacteria	p__Actinobacteriota	c__Actinobacteria	o__Propionibacteriales	f__Propionibacteriaceae	g__Propioniciclava	s__metagenome_g__Propioniciclava	OTU1006	1	0	1	4	0	0	0	0	0	0	6
d__Bacteria	k__norank_d__Bacteria	p__Bacteroidota	c__Bacteroidia	o__Chitinophagales	f__Chitinophagaceae	g__unclassified_f__Chitinophagaceae	s__unclassified_f__Chitinophagaceae	OTU1077	0	0	2	0	0	0	0	1	0	13	16
d__Bacteria	k__norank_d__Bacteria	p__Proteobacteria	c__Alphaproteobacteria	o__Sphingomonadales	f__Sphingomonadaceae	g__Novosphingobium	s__metagenome_g__Novosphingobium	OTU59	2	1	1	0	0	1	0	0	0	0	5
d__Bacteria	k__norank_d__Bacteria	p__Firmicutes	c__Bacilli	o__Erysipelotrichales	f__Erysipelotrichaceae	g__Dielma	s__uncultured_bacterium_g__Dielma	OTU258	0	1	3	6	0	1	1	1	0	2	15
d__Bacteria	k__norank_d__Bacteria	p__Proteobacteria	c__Gammaproteobacteria	o__Burkholderiales	f__Neisseriaceae	g__norank_f__Neisseriaceae	s__unclassified_g__norank_f__Neisseriaceae	OTU1068	0	0	0	0	0	0	0	0	0	12	12
d__Bacteria	k__norank_d__Bacteria	p__Bacteroidota	c__Bacteroidia	o__Cytophagales	f__Spirosomaceae	g__Runella	s__unclassified_g__Runella	OTU477	0	0	2	0	0	0	0	0	0	0	2
d__Bacteria	k__norank_d__Bacteria	p__Patescibacteria	c__Saccharimonadia	o__Saccharimonadales	f__norank_o__Saccharimonadales	g__norank_f__norank_o__Saccharimonadales	s__uncultured_candidate_division_WS5_bacterium	OTU497	0	0	0	1	0	0	0	0	0	0	1
d__Bacteria	k__norank_d__Bacteria	p__Firmicutes	c__Clostridia	o__norank_c__Clostridia	f__Hungateiclostridiaceae	g__Ruminiclostridium	s__Ruminiclostridium_hungatei	OTU848	0	0	0	0	0	3	0	0	0	1	4
d__Bacteria	k__norank_d__Bacteria	p__Actinobacteriota	c__Actinobacteria	o__Micrococcales	f__Promicromonosporaceae	g__Cellulosimicrobium	s__Cellulosimicrobium_cellulans_g__Cellulosimicrobium	OTU492	0	0	1	1	0	0	0	0	0	0	2
d__Bacteria	k__norank_d__Bacteria	p__unclassified_k__norank_d__Bacteria	c__unclassified_k__norank_d__Bacteria	o__unclassified_k__norank_d__Bacteria	f__unclassified_k__norank_d__Bacteria	g__unclassified_k__norank_d__Bacteria	s__unclassified_k__norank_d__Bacteria	OTU6	0	0	0	1	0	0	0	0	0	0	1
d__Bacteria	k__norank_d__Bacteria	p__Chloroflexi	c__Anaerolineae	o__Anaerolineales	f__Anaerolineaceae	g__norank_f__Anaerolineaceae	s__unclassified_g__norank_f__Anaerolineaceae	OTU107	0	0	0	0	0	0	0	0	0	1	1
d__Bacteria	k__norank_d__Bacteria	p__Proteobacteria	c__Gammaproteobacteria	o__Burkholderiales	f__Comamonadaceae	g__Hydrogenophaga	s__uncultured_bacterium_g__Hydrogenophaga	OTU922	2	0	0	0	0	1	0	6	0	5	14
d__Bacteria	k__norank_d__Bacteria	p__Deinococcota	c__Deinococci	o__Deinococcales	f__Deinococcaceae	g__Deinococcus	s__Deinococcus_soli_Cha_et_al._2016	OTU834	0	0	1	0	0	0	0	0	0	0	1
d__Bacteria	k__norank_d__Bacteria	p__Gemmatimonadota	c__Gemmatimonadetes	o__Gemmatimonadales	f__Gemmatimonadaceae	g__norank_f__Gemmatimonadaceae	s__unclassified_g__norank_f__Gemmatimonadaceae	OTU250	0	0	0	0	0	0	0	1	1	0	2
d__Bacteria	k__norank_d__Bacteria	p__Actinobacteriota	c__Actinobacteria	o__Corynebacteriales	f__Corynebacteriaceae	g__Corynebacterium	s__Corynebacterium_variabile	OTU482	0	0	7	0	0	0	0	0	0	0	7
d__Bacteria	k__norank_d__Bacteria	p__Campilobacterota	c__Campylobacteria	o__Campylobacterales	f__Arcobacteraceae	g__Malaciobacter	s__Arcobacter_mytili_LMG_24559	OTU655	152	0	0	14	0	0	0	1	0	23	190
d__Bacteria	k__norank_d__Bacteria	p__Proteobacteria	c__Gammaproteobacteria	o__Burkholderiales	f__Comamonadaceae	g__unclassified_f__Comamonadaceae	s__unclassified_f__Comamonadaceae	OTU1088	0	0	0	0	0	0	0	0	0	1	1
d__Bacteria	k__norank_d__Bacteria	p__Nitrospirota	c__Thermodesulfovibrionia	o__norank_c__Thermodesulfovibrionia	f__norank_o__norank_c__Thermodesulfovibrionia	g__norank_f__norank_o__norank_c__Thermodesulfovibrionia	s__uncultured_prokaryote_g__norank_f__norank_o__norank_c__Thermodesulfovibrionia	OTU644	0	0	0	0	0	0	0	0	0	1	1
d__Bacteria	k__norank_d__Bacteria	p__Desulfobacterota	c__Desulfobaccia	o__Desulfobaccales	f__Desulfobaccaceae	g__Desulfobacca	s__unclassified_g__Desulfobacca	OTU120	0	0	0	3	0	0	0	0	0	0	3
d__Bacteria	k__norank_d__Bacteria	p__Actinobacteriota	c__unclassified_p__Actinobacteriota	o__unclassified_p__Actinobacteriota	f__unclassified_p__Actinobacteriota	g__unclassified_p__Actinobacteriota	s__unclassified_p__Actinobacteriota	OTU23	1	0	0	0	0	0	0	0	0	3	4
d__Bacteria	k__norank_d__Bacteria	p__Patescibacteria	c__Saccharimonadia	o__Saccharimonadales	f__LWQ8	g__norank_f__LWQ8	s__uncultured_bacterium_g__norank_f__LWQ8	OTU540	21	147	1	352	31	1	10	34	0	0	597
d__Bacteria	k__norank_d__Bacteria	p__Proteobacteria	c__Gammaproteobacteria	o__Competibacterales	f__Competibacteraceae	g__Candidatus_Competibacter	s__unclassified_g__Candidatus_Competibacter	OTU153	0	0	0	0	1	0	0	0	0	0	1
d__Bacteria	k__norank_d__Bacteria	p__Firmicutes	c__Bacilli	o__Lactobacillales	f__Enterococcaceae	g__Enterococcus	s__Enterococcus_casseliflavus_g__Enterococcus	OTU666	1	0	1	1	0	0	0	0	0	0	3
d__Bacteria	k__norank_d__Bacteria	p__Firmicutes	c__Bacilli	o__Mycoplasmatales	f__Mycoplasmataceae	g__Candidatus_Bacilloplasma	s__uncultured_bacterium_g__Candidatus_Bacilloplasma	OTU832	506	57	256	4587	161	1500	789	117	4933	88	12994
d__Bacteria	k__norank_d__Bacteria	p__Proteobacteria	c__Alphaproteobacteria	o__Rhizobiales	f__Hyphomicrobiaceae	g__Pedomicrobium	s__uncultured_bacterium_g__Pedomicrobium	OTU325	0	1	6	2	3	0	0	0	1	4	17
d__Bacteria	k__norank_d__Bacteria	p__Proteobacteria	c__Alphaproteobacteria	o__Rhizobiales	f__Beijerinckiaceae	g__Methylocystis	s__uncultured_bacterium_g__Methylocystis	OTU1016	6	27	73	112	25	0	19	1	9	9	281
d__Bacteria	k__norank_d__Bacteria	p__Proteobacteria	c__Alphaproteobacteria	o__Rhizobiales	f__Devosiaceae	g__Devosia	s__unclassified_g__Devosia	OTU489	0	3	15	0	0	0	0	0	0	0	18
d__Bacteria	k__norank_d__Bacteria	p__Verrucomicrobiota	c__Verrucomicrobiae	o__Verrucomicrobiales	f__Rubritaleaceae	g__Luteolibacter	s__uncultured_bacterium_g__Luteolibacter	OTU688	0	0	0	0	0	0	0	0	1	0	1
d__Bacteria	k__norank_d__Bacteria	p__Acidobacteriota	c__Vicinamibacteria	o__Subgroup_17	f__norank_o__Subgroup_17	g__norank_f__norank_o__Subgroup_17	s__uncultured_Acidobacteria_bacterium_g__norank_f__norank_o__Subgroup_17	OTU1154	0	0	0	0	0	0	0	0	0	1	1
d__Bacteria	k__norank_d__Bacteria	p__Actinobacteriota	c__Actinobacteria	o__Micrococcales	f__Micrococcaceae	g__Renibacterium	s__unclassified_g__Renibacterium	OTU896	0	0	0	0	0	0	2	0	0	0	2
d__Bacteria	k__norank_d__Bacteria	p__Chloroflexi	c__Anaerolineae	o__SJA-15	f__norank_o__SJA-15	g__norank_f__norank_o__SJA-15	s__unclassified_g__norank_f__norank_o__SJA-15	OTU144	0	0	0	2	0	0	0	0	0	2	4
d__Bacteria	k__norank_d__Bacteria	p__Firmicutes	c__Bacilli	o__unclassified_c__Bacilli	f__unclassified_c__Bacilli	g__unclassified_c__Bacilli	s__unclassified_c__Bacilli	OTU884	0	0	0	1	0	0	0	0	0	1	2
d__Bacteria	k__norank_d__Bacteria	p__Proteobacteria	c__Alphaproteobacteria	o__Sphingomonadales	f__Sphingomonadaceae	g__Porphyrobacter	s__unclassified_g__Porphyrobacter	OTU195	2	1	15	1	0	0	0	0	0	3	22
d__Bacteria	k__norank_d__Bacteria	p__Proteobacteria	c__Gammaproteobacteria	o__Burkholderiales	f__Sutterellaceae	g__norank_f__Sutterellaceae	s__unclassified_g__norank_f__Sutterellaceae	OTU1078	0	0	1	0	3	0	0	0	0	4	8
d__Bacteria	k__norank_d__Bacteria	p__Patescibacteria	c__Dojkabacteria	o__norank_c__Dojkabacteria	f__norank_o__norank_c__Dojkabacteria	g__norank_f__norank_o__norank_c__Dojkabacteria	s__uncultured_bacterium_g__norank_f__norank_o__norank_c__Dojkabacteria	OTU501	0	0	0	1	0	1	0	0	0	0	2
d__Bacteria	k__norank_d__Bacteria	p__Proteobacteria	c__Alphaproteobacteria	o__Rhizobiales	f__Beijerinckiaceae	g__Bosea	s__unclassified_g__Bosea	OTU143	0	0	6	1	0	0	0	0	0	0	7
d__Bacteria	k__norank_d__Bacteria	p__Firmicutes	c__Bacilli	o__Lactobacillales	f__Streptococcaceae	g__Streptococcus	s__Streptococcus_parauberis	OTU648	0	0	1	0	0	0	0	0	0	0	1
d__Bacteria	k__norank_d__Bacteria	p__Acidobacteriota	c__Blastocatellia	o__Blastocatellales	f__Blastocatellaceae	g__unclassified_f__Blastocatellaceae	s__unclassified_f__Blastocatellaceae	OTU32	0	0	0	3	0	0	0	0	0	0	3
d__Bacteria	k__norank_d__Bacteria	p__Patescibacteria	c__Saccharimonadia	o__Saccharimonadales	f__norank_o__Saccharimonadales	g__norank_f__norank_o__Saccharimonadales	s__uncultured_bacterium_SBR2013	OTU149	0	0	0	2	0	0	1	0	0	0	3
d__Bacteria	k__norank_d__Bacteria	p__Firmicutes	c__Bacilli	o__Mycoplasmatales	f__Mycoplasmataceae	g__norank_f__Mycoplasmataceae	s__uncultured_Firmicutes_bacterium_g__norank_f__Mycoplasmataceae	OTU1105	115	108	21	190	28	26	112	245	23	0	868
d__Bacteria	k__norank_d__Bacteria	p__Proteobacteria	c__Gammaproteobacteria	o__Alteromonadales	f__Shewanellaceae	g__Shewanella	s__Shewanella_sp._MR-7	OTU383	0	1	1	0	0	0	0	0	0	0	2
d__Bacteria	k__norank_d__Bacteria	p__Patescibacteria	c__Saccharimonadia	o__Saccharimonadales	f__unclassified_o__Saccharimonadales	g__unclassified_o__Saccharimonadales	s__unclassified_o__Saccharimonadales	OTU1089	0	0	0	0	0	1	0	0	0	7	8
d__Bacteria	k__norank_d__Bacteria	p__Proteobacteria	c__Gammaproteobacteria	o__Burkholderiales	f__Rhodocyclaceae	g__unclassified_f__Rhodocyclaceae	s__unclassified_f__Rhodocyclaceae	OTU377	0	0	0	0	0	0	0	1	0	0	1
d__Bacteria	k__norank_d__Bacteria	p__Cyanobacteria	c__Cyanobacteriia	o__Synechococcales	f__Cyanobiaceae	g__Cyanobium_PCC-6307	s__unclassified_g__Cyanobium_PCC-6307	OTU96	9	6	30	63	16	0	1	1	12	24	162
d__Bacteria	k__norank_d__Bacteria	p__Chloroflexi	c__KD4-96	o__norank_c__KD4-96	f__norank_o__norank_c__KD4-96	g__norank_f__norank_o__norank_c__KD4-96	s__unclassified_g__norank_f__norank_o__norank_c__KD4-96	OTU106	2	0	4	3	0	0	0	0	1	1	11
d__Bacteria	k__norank_d__Bacteria	p__Firmicutes	c__Clostridia	o__Clostridiales	f__Clostridiaceae	g__Clostridium_sensu_stricto_12	s__unclassified_g__Clostridium_sensu_stricto_12	OTU1035	0	1	0	0	0	0	0	0	0	0	1
d__Bacteria	k__norank_d__Bacteria	p__Proteobacteria	c__Alphaproteobacteria	o__Rhizobiales	f__Rhizobiaceae	g__Allorhizobium-Neorhizobium-Pararhizobium-Rhizobium	s__unclassified_g__Allorhizobium-Neorhizobium-Pararhizobium-Rhizobium	OTU865	0	0	14	0	0	0	0	1	0	0	15
d__Bacteria	k__norank_d__Bacteria	p__Cyanobacteria	c__Cyanobacteriia	o__Cyanobacteriales	f__Geitlerinemaceae	g__Geitlerinema_PCC-7105	s__uncultured_cyanobacterium_g__Geitlerinema_PCC-7105	OTU557	0	0	0	0	0	0	0	0	0	1	1
d__Bacteria	k__norank_d__Bacteria	p__Firmicutes	c__Bacilli	o__Entomoplasmatales	f__Entomoplasmatales_Incertae_Sedis	g__Candidatus_Hepatoplasma	s__unclassified_g__Candidatus_Hepatoplasma	OTU555	1918	1167	1894	1217	15739	2209	2009	7936	9291	0	43380
d__Bacteria	k__norank_d__Bacteria	p__Actinobacteriota	c__Acidimicrobiia	o__Microtrichales	f__Microtrichaceae	g__norank_f__Microtrichaceae	s__unclassified_g__norank_f__Microtrichaceae	OTU550	0	0	0	1	2	0	0	0	0	0	3
d__Bacteria	k__norank_d__Bacteria	p__Proteobacteria	c__Gammaproteobacteria	o__Pseudomonadales	f__Moraxellaceae	g__Acinetobacter	s__unclassified_g__Acinetobacter	OTU215	2	0	0	2	0	0	0	0	0	2	6
d__Bacteria	k__norank_d__Bacteria	p__Proteobacteria	c__Alphaproteobacteria	o__Rhizobiales	f__Beijerinckiaceae	g__Roseiarcus	s__uncultured_bacterium_g__Roseiarcus	OTU212	0	1	0	1	0	0	0	0	0	0	2
d__Bacteria	k__norank_d__Bacteria	p__Acidobacteriota	c__Vicinamibacteria	o__Vicinamibacterales	f__Vicinamibacteraceae	g__Luteitalea	s__uncultured_bacterium_g__Luteitalea	OTU26	0	0	0	1	0	0	0	0	1	0	2
d__Bacteria	k__norank_d__Bacteria	p__Firmicutes	c__Bacilli	o__Mycoplasmatales	f__Mycoplasmataceae	g__norank_f__Mycoplasmataceae	s__uncultured_Firmicutes_bacterium_g__norank_f__Mycoplasmataceae	OTU1149	26	0	0	82	12	28	104	0	4	0	256
d__Bacteria	k__norank_d__Bacteria	p__Actinobacteriota	c__Acidimicrobiia	o__unclassified_c__Acidimicrobiia	f__unclassified_c__Acidimicrobiia	g__unclassified_c__Acidimicrobiia	s__unclassified_c__Acidimicrobiia	OTU641	0	0	6	0	0	0	0	0	0	0	6
d__Bacteria	k__norank_d__Bacteria	p__Cyanobacteria	c__Vampirivibrionia	o__Vampirovibrionales	f__norank_o__Vampirovibrionales	g__norank_f__norank_o__Vampirovibrionales	s__uncultured_bacterium_g__norank_f__norank_o__Vampirovibrionales	OTU1096	0	0	3	0	0	0	0	0	0	0	3
d__Bacteria	k__norank_d__Bacteria	p__Patescibacteria	c__Parcubacteria	o__Candidatus_Kaiserbacteria	f__norank_o__Candidatus_Kaiserbacteria	g__norank_f__norank_o__Candidatus_Kaiserbacteria	s__uncultured_bacterium_g__norank_f__norank_o__Candidatus_Kaiserbacteria	OTU371	0	0	0	0	1	0	0	0	0	0	1
d__Bacteria	k__norank_d__Bacteria	p__Proteobacteria	c__Gammaproteobacteria	o__Burkholderiales	f__Comamonadaceae	g__Ramlibacter	s__unclassified_g__Ramlibacter	OTU281	1	0	0	3	2	1	0	0	0	0	7
d__Bacteria	k__norank_d__Bacteria	p__Desulfobacterota	c__Desulfobulbia	o__Desulfobulbales	f__Desulfobulbaceae	g__Desulfobulbus	s__uncultured_bacterium_g__Desulfobulbus	OTU614	0	0	0	0	1	1	0	0	0	0	2
d__Bacteria	k__norank_d__Bacteria	p__Bacteroidota	c__Bacteroidia	o__Bacteroidales	f__Prolixibacteraceae	g__Roseimarinus	s__uncultured_bacterium_g__Roseimarinus	OTU1100	0	0	2	0	3	2	0	0	0	0	7
d__Bacteria	k__norank_d__Bacteria	p__Patescibacteria	c__Saccharimonadia	o__Saccharimonadales	f__norank_o__Saccharimonadales	g__norank_f__norank_o__Saccharimonadales	s__unclassified_g__norank_f__norank_o__Saccharimonadales	OTU87	0	0	14	2	0	0	0	2	0	0	18
d__Bacteria	k__norank_d__Bacteria	p__Actinobacteriota	c__Actinobacteria	o__Corynebacteriales	f__Corynebacteriaceae	g__Corynebacterium	s__unclassified_g__Corynebacterium	OTU716	0	2	91	5	0	0	3	7	2	0	110
d__Bacteria	k__norank_d__Bacteria	p__Actinobacteriota	c__Actinobacteria	o__Propionibacteriales	f__Nocardioidaceae	g__Nocardioides	s__Nocardioides_sp._g__Nocardioides	OTU700	0	1	1	6	2	0	0	0	0	3	13
d__Bacteria	k__norank_d__Bacteria	p__Patescibacteria	c__CPR2	o__norank_c__CPR2	f__norank_o__norank_c__CPR2	g__norank_f__norank_o__norank_c__CPR2	s__uncultured_bacterium_g__norank_f__norank_o__norank_c__CPR2	OTU66	0	0	1	1	0	0	0	0	0	0	2
d__Bacteria	k__norank_d__Bacteria	p__Patescibacteria	c__CPR2	o__norank_c__CPR2	f__norank_o__norank_c__CPR2	g__norank_f__norank_o__norank_c__CPR2	s__uncultured_bacterium_g__norank_f__norank_o__norank_c__CPR2	OTU65	0	0	0	1	0	0	0	0	1	0	2
d__Bacteria	k__norank_d__Bacteria	p__Cyanobacteria	c__Cyanobacteriia	o__Chloroplast	f__norank_o__Chloroplast	g__norank_f__norank_o__Chloroplast	s__unclassified_g__norank_f__norank_o__Chloroplast	OTU62	2	0	1	3	1	0	0	0	0	2	9
d__Bacteria	k__norank_d__Bacteria	p__Patescibacteria	c__Saccharimonadia	o__Saccharimonadales	f__Saccharimonadaceae	g__unclassified_f__Saccharimonadaceae	s__unclassified_f__Saccharimonadaceae	OTU822	5	234	46	300	33	0	10	20	0	1	649
d__Bacteria	k__norank_d__Bacteria	p__Bacteroidota	c__Bacteroidia	o__Flavobacteriales	f__Weeksellaceae	g__Cloacibacterium	s__unclassified_g__Cloacibacterium	OTU563	0	0	4	0	1	1	0	1	0	1	8
d__Bacteria	k__norank_d__Bacteria	p__Patescibacteria	c__Saccharimonadia	o__Saccharimonadales	f__norank_o__Saccharimonadales	g__norank_f__norank_o__Saccharimonadales	s__uncultured_bacterium_g__norank_f__norank_o__Saccharimonadales	OTU719	0	0	1	0	0	0	0	0	0	0	1
d__Bacteria	k__norank_d__Bacteria	p__Cyanobacteria	c__Cyanobacteriia	o__Chloroplast	f__norank_o__Chloroplast	g__norank_f__norank_o__Chloroplast	s__Chlorotetraedron_incus	OTU595	0	0	0	0	1	0	0	0	0	0	1
d__Bacteria	k__norank_d__Bacteria	p__Actinobacteriota	c__Coriobacteriia	o__OPB41	f__norank_o__OPB41	g__norank_f__norank_o__OPB41	s__unclassified_g__norank_f__norank_o__OPB41	OTU1064	1	0	2	21	5	0	0	3	4	7	43
d__Bacteria	k__norank_d__Bacteria	p__Patescibacteria	c__Saccharimonadia	o__Saccharimonadales	f__norank_o__Saccharimonadales	g__norank_f__norank_o__Saccharimonadales	s__unclassified_g__norank_f__norank_o__Saccharimonadales	OTU589	0	0	0	0	1	0	0	0	0	0	1
d__Bacteria	k__norank_d__Bacteria	p__Cyanobacteria	c__Cyanobacteriia	o__Chloroplast	f__norank_o__Chloroplast	g__norank_f__norank_o__Chloroplast	s__unclassified_g__norank_f__norank_o__Chloroplast	OTU419	0	0	0	1	0	0	0	0	0	0	1
d__Bacteria	k__norank_d__Bacteria	p__Proteobacteria	c__Alphaproteobacteria	o__Acetobacterales	f__Acetobacteraceae	g__norank_f__Acetobacteraceae	s__unclassified_g__norank_f__Acetobacteraceae	OTU370	0	0	0	1	0	0	0	0	0	0	1
d__Bacteria	k__norank_d__Bacteria	p__Proteobacteria	c__Alphaproteobacteria	o__Sphingomonadales	f__Sphingomonadaceae	g__Sphingorhabdus	s__uncultured_bacterium_g__Sphingorhabdus	OTU109	0	0	5	1	0	0	1	0	0	1	8
d__Bacteria	k__norank_d__Bacteria	p__Actinobacteriota	c__Acidimicrobiia	o__Microtrichales	f__Ilumatobacteraceae	g__Ilumatobacter	s__uncultured_bacterium_g__Ilumatobacter	OTU1142	0	0	2	3	1	0	0	2	0	0	8
d__Bacteria	k__norank_d__Bacteria	p__Desulfobacterota	c__Desulfobacteria	o__Desulfatiglandales	f__Desulfatiglandaceae	g__Desulfatiglans	s__uncultured_delta_proteobacterium_g__Desulfatiglans	OTU116	0	0	0	0	0	0	0	0	0	2	2
d__Bacteria	k__norank_d__Bacteria	p__Proteobacteria	c__Gammaproteobacteria	o__Burkholderiales	f__Burkholderiaceae	g__Polynucleobacter	s__uncultured_bacterium_g__Polynucleobacter	OTU431	0	1	0	0	0	0	0	0	0	1	2
d__Bacteria	k__norank_d__Bacteria	p__Proteobacteria	c__Gammaproteobacteria	o__Vibrionales	f__Vibrionaceae	g__Vibrio	s__Vibrio_campbellii	OTU642	525	109	102	133	456	85	301	1	0	6257	7969
d__Bacteria	k__norank_d__Bacteria	p__Proteobacteria	c__Gammaproteobacteria	o__Vibrionales	f__Vibrionaceae	g__Vibrio	s__unclassified_g__Vibrio	OTU57	1	0	0	0	0	0	0	0	0	0	1
d__Bacteria	k__norank_d__Bacteria	p__Desulfobacterota	c__Desulfuromonadia	o__norank_c__Desulfuromonadia	f__Geothermobacteraceae	g__Geothermobacter	s__unclassified_g__Geothermobacter	OTU147	0	0	0	0	0	0	0	0	1	1	2
d__Bacteria	k__norank_d__Bacteria	p__Chloroflexi	c__Anaerolineae	o__Anaerolineales	f__Anaerolineaceae	g__norank_f__Anaerolineaceae	s__unclassified_g__norank_f__Anaerolineaceae	OTU55	1	0	0	0	0	0	0	1	0	0	2
d__Bacteria	k__norank_d__Bacteria	p__Proteobacteria	c__Alphaproteobacteria	o__Sphingomonadales	f__Sphingomonadaceae	g__Altererythrobacter	s__unclassified_g__Altererythrobacter	OTU1060	0	0	0	0	0	0	0	0	1	0	1
d__Bacteria	k__norank_d__Bacteria	p__Chloroflexi	c__Anaerolineae	o__Anaerolineales	f__Anaerolineaceae	g__norank_f__Anaerolineaceae	s__unclassified_g__norank_f__Anaerolineaceae	OTU58	1	0	0	0	0	0	0	0	0	0	1
d__Bacteria	k__norank_d__Bacteria	p__Proteobacteria	c__Alphaproteobacteria	o__Rhodobacterales	f__Rhodobacteraceae	g__Rubellimicrobium	s__unclassified_g__Rubellimicrobium	OTU881	0	0	5	1	0	0	0	0	0	0	6
d__Bacteria	k__norank_d__Bacteria	p__Acidobacteriota	c__Acidobacteriae	o__Acidobacteriales	f__norank_o__Acidobacteriales	g__norank_f__norank_o__Acidobacteriales	s__uncultured_Acidobacteria_bacterium_g__norank_f__norank_o__Acidobacteriales	OTU424	0	1	0	0	0	0	0	0	0	0	1
d__Bacteria	k__norank_d__Bacteria	p__Desulfobacterota	c__Desulfobaccia	o__Desulfobaccales	f__Desulfobaccaceae	g__Desulfobacca	s__uncultured_bacterium_g__Desulfobacca	OTU790	0	0	3	3	0	0	0	0	0	0	6
d__Bacteria	k__norank_d__Bacteria	p__Firmicutes	c__Clostridia	o__Lachnospirales	f__Lachnospiraceae	g__unclassified_f__Lachnospiraceae	s__unclassified_f__Lachnospiraceae	OTU594	0	0	27	23	372	24	22	0	0	34	502
d__Bacteria	k__norank_d__Bacteria	p__Firmicutes	c__Clostridia	o__Lachnospirales	f__Lachnospiraceae	g__Ruminococcus_torques_group	s__unclassified_g__Ruminococcus_torques_group	OTU863	0	0	0	0	1	0	0	0	0	0	1
d__Bacteria	k__norank_d__Bacteria	p__Proteobacteria	c__Gammaproteobacteria	o__Burkholderiales	f__Comamonadaceae	g__Comamonas	s__Comamonas_aquatica	OTU957	0	0	0	0	0	0	0	2	0	1	3
d__Bacteria	k__norank_d__Bacteria	p__Bacteroidota	c__Bacteroidia	o__Cytophagales	f__Spirosomaceae	g__norank_f__Spirosomaceae	s__uncultured_bacterium_g__norank_f__Spirosomaceae	OTU513	3	7	14	34	2	2	0	0	0	0	62
d__Bacteria	k__norank_d__Bacteria	p__Bacteroidota	c__Bacteroidia	o__Sphingobacteriales	f__AKYH767	g__norank_f__AKYH767	s__uncultured_bacterium_g__norank_f__AKYH767	OTU621	0	0	0	0	0	0	0	1	0	0	1
d__Bacteria	k__norank_d__Bacteria	p__Chloroflexi	c__Anaerolineae	o__SJA-15	f__norank_o__SJA-15	g__norank_f__norank_o__SJA-15	s__uncultured_bacterium_g__norank_f__norank_o__SJA-15	OTU744	0	0	0	1	0	0	0	0	0	0	1
d__Bacteria	k__norank_d__Bacteria	p__Bacteroidota	c__Bacteroidia	o__Cytophagales	f__Spirosomaceae	g__unclassified_f__Spirosomaceae	s__unclassified_f__Spirosomaceae	OTU586	0	0	0	0	0	0	0	0	0	1	1
d__Bacteria	k__norank_d__Bacteria	p__Desulfobacterota	c__Desulfobaccia	o__Desulfobaccales	f__Desulfobaccaceae	g__Desulfobacca	s__bacterium_enrichment_culture_clone_E8	OTU449	0	0	1	0	0	0	0	0	0	0	1
d__Bacteria	k__norank_d__Bacteria	p__Actinobacteriota	c__Acidimicrobiia	o__Microtrichales	f__Ilumatobacteraceae	g__CL500-29_marine_group	s__metagenome_g__CL500-29_marine_group	OTU1135	0	1	1	6	1	0	0	0	0	2	11
d__Bacteria	k__norank_d__Bacteria	p__Proteobacteria	c__Gammaproteobacteria	o__Legionellales	f__Legionellaceae	g__Legionella	s__uncultured_bacterium_g__Legionella	OTU50	1	0	0	0	0	0	0	0	0	0	1
d__Bacteria	k__norank_d__Bacteria	p__Proteobacteria	c__Gammaproteobacteria	o__Xanthomonadales	f__Xanthomonadaceae	g__Stenotrophomonas	s__Pseudomonas_geniculata_g__Stenotrophomonas	OTU458	0	1	8	0	0	0	0	0	0	0	9
d__Bacteria	k__norank_d__Bacteria	p__Bacteroidota	c__Bacteroidia	o__Bacteroidales	f__Prolixibacteraceae	g__Roseimarinus	s__uncultured_bacterium_g__Roseimarinus	OTU844	16	1	0	137	0	831	26	4	70	8553	9638
d__Bacteria	k__norank_d__Bacteria	p__Proteobacteria	c__Gammaproteobacteria	o__Pseudomonadales	f__Moraxellaceae	g__Acinetobacter	s__Acinetobacter_sp._CIP_64.2	OTU514	2	0	0	163	8	0	0	2	2	0	177
d__Bacteria	k__norank_d__Bacteria	p__Proteobacteria	c__Gammaproteobacteria	o__Pseudomonadales	f__Moraxellaceae	g__Acinetobacter	s__unclassified_g__Acinetobacter	OTU505	3	0	3	376	21	0	3	12	7	3	428
d__Bacteria	k__norank_d__Bacteria	p__Proteobacteria	c__Alphaproteobacteria	o__Rhodobacterales	f__Rhodobacteraceae	g__Gemmobacter	s__unclassified_g__Gemmobacter	OTU1061	1	0	15	15	2	0	1	2	4	3	43
d__Bacteria	k__norank_d__Bacteria	p__Actinobacteriota	c__Actinobacteria	o__Micrococcales	f__Intrasporangiaceae	g__Ornithinimicrobium	s__Ornithinimicrobium_humiphilum	OTU498	0	0	0	1	0	0	0	0	0	0	1
d__Bacteria	k__norank_d__Bacteria	p__Proteobacteria	c__Gammaproteobacteria	o__Legionellales	f__Legionellaceae	g__Legionella	s__unclassified_g__Legionella	OTU851	0	0	1	4	0	1	0	2	2	4	14
d__Bacteria	k__norank_d__Bacteria	p__Nitrospinota	c__P9X2b3D02	o__norank_c__P9X2b3D02	f__norank_o__norank_c__P9X2b3D02	g__norank_f__norank_o__norank_c__P9X2b3D02	s__uncultured_bacterium_g__norank_f__norank_o__norank_c__P9X2b3D02	OTU90	0	0	0	0	0	0	0	0	0	1	1
d__Bacteria	k__norank_d__Bacteria	p__Verrucomicrobiota	c__Chlamydiae	o__Chlamydiales	f__cvE6	g__norank_f__cvE6	s__metagenome_g__norank_f__cvE6	OTU908	0	0	0	2	0	0	8	0	0	0	10
d__Bacteria	k__norank_d__Bacteria	p__Firmicutes	c__Bacilli	o__Bacillales	f__Planococcaceae	g__Jeotgalibacillus	s__Jeotgalibacillus_malaysiensis	OTU898	2	2	29	41	12	1	8	12	1	6	114
d__Bacteria	k__norank_d__Bacteria	p__Actinobacteriota	c__Actinobacteria	o__Micrococcales	f__Micrococcaceae	g__Kocuria	s__unclassified_g__Kocuria	OTU649	4	0	22	3	0	1	0	4	0	3	37
d__Bacteria	k__norank_d__Bacteria	p__Proteobacteria	c__Alphaproteobacteria	o__Acetobacterales	f__Acetobacteraceae	g__Roseomonas	s__unclassified_g__Roseomonas	OTU53	1	1	1	0	1	0	0	2	0	1	7
d__Bacteria	k__norank_d__Bacteria	p__Chloroflexi	c__Anaerolineae	o__Caldilineales	f__Caldilineaceae	g__norank_f__Caldilineaceae	s__unclassified_g__norank_f__Caldilineaceae	OTU973	0	0	0	0	0	0	0	1	0	0	1
d__Bacteria	k__norank_d__Bacteria	p__Firmicutes	c__Clostridia	o__Peptostreptococcales-Tissierellales	f__Thermotaleaceae	g__Crassaminicella	s__Marinisporobacter_sp.	OTU1093	0	0	0	0	0	0	0	0	0	3	3
d__Bacteria	k__norank_d__Bacteria	p__Bacteroidota	c__Bacteroidia	o__Chitinophagales	f__Saprospiraceae	g__norank_f__Saprospiraceae	s__uncultured_bacterium_g__norank_f__Saprospiraceae	OTU480	0	0	1	0	0	0	0	0	0	0	1
d__Bacteria	k__norank_d__Bacteria	p__Bacteroidota	c__Bacteroidia	o__Chitinophagales	f__Chitinophagaceae	g__norank_f__Chitinophagaceae	s__unclassified_g__norank_f__Chitinophagaceae	OTU1082	0	0	0	0	0	0	0	0	0	4	4
d__Bacteria	k__norank_d__Bacteria	p__Proteobacteria	c__Alphaproteobacteria	o__Holosporales	f__Holosporaceae	g__norank_f__Holosporaceae	s__uncultured_bacterium_g__norank_f__Holosporaceae	OTU603	0	0	0	0	2	0	0	0	0	0	2
d__Bacteria	k__norank_d__Bacteria	p__Proteobacteria	c__Alphaproteobacteria	o__Rhizobiales	f__Hyphomicrobiaceae	g__Hyphomicrobium	s__metagenome_g__Hyphomicrobium	OTU856	1	0	0	5	1	1	1	0	0	2	11
d__Bacteria	k__norank_d__Bacteria	p__Chloroflexi	c__Anaerolineae	o__SJA-15	f__norank_o__SJA-15	g__norank_f__norank_o__SJA-15	s__unclassified_g__norank_f__norank_o__SJA-15	OTU1129	2	0	4	1	0	0	0	0	0	2	9
d__Bacteria	k__norank_d__Bacteria	p__Proteobacteria	c__Alphaproteobacteria	o__Rhizobiales	f__Rhizobiales_Incertae_Sedis	g__norank_f__Rhizobiales_Incertae_Sedis	s__unclassified_g__norank_f__Rhizobiales_Incertae_Sedis	OTU1037	0	2	7	0	0	1	0	0	1	1	12
d__Bacteria	k__norank_d__Bacteria	p__Patescibacteria	c__Dojkabacteria	o__norank_c__Dojkabacteria	f__norank_o__norank_c__Dojkabacteria	g__norank_f__norank_o__norank_c__Dojkabacteria	s__uncultured_bacterium_g__norank_f__norank_o__norank_c__Dojkabacteria	OTU611	0	0	0	0	1	0	0	0	0	0	1
d__Bacteria	k__norank_d__Bacteria	p__Actinobacteriota	c__Thermoleophilia	o__Gaiellales	f__norank_o__Gaiellales	g__norank_f__norank_o__Gaiellales	s__unclassified_g__norank_f__norank_o__Gaiellales	OTU741	0	0	0	0	0	0	0	0	0	3	3
d__Bacteria	k__norank_d__Bacteria	p__Actinobacteriota	c__Acidimicrobiia	o__Microtrichales	f__Iamiaceae	g__Iamia	s__metagenome_g__Iamia	OTU770	0	0	0	2	0	0	0	0	0	0	2
d__Bacteria	k__norank_d__Bacteria	p__Desulfobacterota	c__Desulfobulbia	o__Desulfobulbales	f__Desulfocapsaceae	g__Desulfobacterium_catecholicum_group	s__uncultured_bacterium_g__Desulfobacterium_catecholicum_group	OTU826	0	0	0	1	0	0	0	0	0	0	1
d__Bacteria	k__norank_d__Bacteria	p__Firmicutes	c__Bacilli	o__Entomoplasmatales	f__Entomoplasmatales_Incertae_Sedis	g__Candidatus_Hepatoplasma	s__Astacus_leptodactylus_narrow-clawed_crayfish	OTU407	171	4459	3904	5733	5	19932	25514	69	137	285	60209
d__Bacteria	k__norank_d__Bacteria	p__Firmicutes	c__Clostridia	o__Lachnospirales	f__unclassified_o__Lachnospirales	g__unclassified_o__Lachnospirales	s__unclassified_o__Lachnospirales	OTU517	0	0	0	3	0	0	0	0	0	0	3
d__Bacteria	k__norank_d__Bacteria	p__Actinobacteriota	c__Actinobacteria	o__PeM15	f__norank_o__PeM15	g__norank_f__norank_o__PeM15	s__unclassified_g__norank_f__norank_o__PeM15	OTU679	0	4	1	7	2	0	0	0	0	0	14
d__Bacteria	k__norank_d__Bacteria	p__Actinobacteriota	c__Acidimicrobiia	o__Microtrichales	f__Ilumatobacteraceae	g__CL500-29_marine_group	s__uncultured_bacterium_g__CL500-29_marine_group	OTU124	0	1	0	0	0	0	0	0	0	0	1
d__Bacteria	k__norank_d__Bacteria	p__Cyanobacteria	c__Cyanobacteriia	o__Synechococcales	f__Cyanobiaceae	g__Cyanobium_PCC-6307	s__unclassified_g__Cyanobium_PCC-6307	OTU1144	29	9	88	272	49	0	10	6	13	21	497
d__Bacteria	k__norank_d__Bacteria	p__Sumerlaeota	c__Sumerlaeia	o__Sumerlaeales	f__Sumerlaeaceae	g__Sumerlaea	s__uncultured_bacterium_g__Sumerlaea	OTU1094	0	0	0	1	0	0	0	0	0	1	2
d__Bacteria	k__norank_d__Bacteria	p__Acidobacteriota	c__Vicinamibacteria	o__Subgroup_17	f__norank_o__Subgroup_17	g__norank_f__norank_o__Subgroup_17	s__unclassified_g__norank_f__norank_o__Subgroup_17	OTU860	2	1	2	5	1	0	2	0	0	0	13
d__Bacteria	k__norank_d__Bacteria	p__Chloroflexi	c__Anaerolineae	o__Anaerolineales	f__Anaerolineaceae	g__norank_f__Anaerolineaceae	s__unclassified_g__norank_f__Anaerolineaceae	OTU784	0	0	1	0	0	0	0	0	0	2	3
d__Bacteria	k__norank_d__Bacteria	p__Patescibacteria	c__Saccharimonadia	o__Saccharimonadales	f__norank_o__Saccharimonadales	g__norank_f__norank_o__Saccharimonadales	s__uncultured_bacterium_g__norank_f__norank_o__Saccharimonadales	OTU1127	0	0	0	2	0	0	0	0	0	0	2
d__Bacteria	k__norank_d__Bacteria	p__Actinobacteriota	c__Acidimicrobiia	o__IMCC26256	f__norank_o__IMCC26256	g__norank_f__norank_o__IMCC26256	s__unclassified_g__norank_f__norank_o__IMCC26256	OTU305	0	0	0	1	0	0	0	0	0	0	1
d__Bacteria	k__norank_d__Bacteria	p__Chloroflexi	c__Anaerolineae	o__Caldilineales	f__Caldilineaceae	g__norank_f__Caldilineaceae	s__uncultured_Anaerolineaceae_bacterium_g__norank_f__Caldilineaceae	OTU256	0	0	0	1	0	0	0	0	0	0	1
d__Bacteria	k__norank_d__Bacteria	p__Desulfobacterota	c__Desulfobaccia	o__Desulfobaccales	f__Desulfobaccaceae	g__Desulfobacca	s__unclassified_g__Desulfobacca	OTU674	4	0	3	5	0	0	0	0	0	0	12
d__Bacteria	k__norank_d__Bacteria	p__Proteobacteria	c__Alphaproteobacteria	o__Caulobacterales	f__Parvularculaceae	g__Amphiplicatus	s__uncultured_Alphaproteobacteria_bacterium_g__Amphiplicatus	OTU331	0	0	0	0	1	0	0	0	0	0	1
d__Bacteria	k__norank_d__Bacteria	p__Proteobacteria	c__Alphaproteobacteria	o__unclassified_c__Alphaproteobacteria	f__unclassified_c__Alphaproteobacteria	g__unclassified_c__Alphaproteobacteria	s__unclassified_c__Alphaproteobacteria	OTU1007	0	0	1	0	0	0	0	0	0	0	1
d__Bacteria	k__norank_d__Bacteria	p__Bacteroidota	c__Bacteroidia	o__Chitinophagales	f__unclassified_o__Chitinophagales	g__unclassified_o__Chitinophagales	s__unclassified_o__Chitinophagales	OTU1101	1	0	0	0	0	0	0	0	0	0	1
d__Bacteria	k__norank_d__Bacteria	p__Verrucomicrobiota	c__Verrucomicrobiae	o__Verrucomicrobiales	f__Rubritaleaceae	g__Luteolibacter	s__uncultured_bacterium_g__Luteolibacter	OTU48	1	0	0	4	0	0	0	0	0	0	5
d__Bacteria	k__norank_d__Bacteria	p__Actinobacteriota	c__Acidimicrobiia	o__Microtrichales	f__Ilumatobacteraceae	g__CL500-29_marine_group	s__uncultured_marine_bacterium_g__CL500-29_marine_group	OTU781	0	0	2	0	0	0	0	0	0	0	2
d__Bacteria	k__norank_d__Bacteria	p__Firmicutes	c__Bacilli	o__Mycoplasmatales	f__Mycoplasmataceae	g__Candidatus_Bacilloplasma	s__uncultured_bacterium_g__Candidatus_Bacilloplasma	OTU165	5	7	1	18	5	9	0	29	0	0	74
d__Bacteria	k__norank_d__Bacteria	p__Proteobacteria	c__Gammaproteobacteria	o__Burkholderiales	f__Rhodocyclaceae	g__norank_f__Rhodocyclaceae	s__uncultured_Rhodocyclaceae_bacterium_g__norank_f__Rhodocyclaceae	OTU1081	0	0	0	0	0	1	0	1	1	2	5
d__Bacteria	k__norank_d__Bacteria	p__Patescibacteria	c__Saccharimonadia	o__Saccharimonadales	f__norank_o__Saccharimonadales	g__norank_f__norank_o__Saccharimonadales	s__unclassified_g__norank_f__norank_o__Saccharimonadales	OTU200	0	1	0	0	0	0	1	0	0	0	2
d__Bacteria	k__norank_d__Bacteria	p__Actinobacteriota	c__Acidimicrobiia	o__Actinomarinales	f__norank_o__Actinomarinales	g__norank_f__norank_o__Actinomarinales	s__uncultured_actinobacterium_g__norank_f__norank_o__Actinomarinales	OTU575	0	0	2	2	0	0	0	0	0	0	4
d__Bacteria	k__norank_d__Bacteria	p__Verrucomicrobiota	c__Verrucomicrobiae	o__Verrucomicrobiales	f__Rubritaleaceae	g__Luteolibacter	s__uncultured_bacterium_g__Luteolibacter	OTU411	0	0	0	2	0	0	0	0	0	0	2
d__Bacteria	k__norank_d__Bacteria	p__Chloroflexi	c__Anaerolineae	o__Anaerolineales	f__Anaerolineaceae	g__RBG-16-58-14	s__uncultured_bacterium_g__RBG-16-58-14	OTU789	1	0	1	1	0	0	0	0	0	1	4
d__Bacteria	k__norank_d__Bacteria	p__Proteobacteria	c__Alphaproteobacteria	o__Rhodobacterales	f__Rhodobacteraceae	g__Paracoccus	s__unclassified_g__Paracoccus	OTU846	16	85	216	119	19	11	6	29	0	13	514
d__Bacteria	k__norank_d__Bacteria	p__Proteobacteria	c__Gammaproteobacteria	o__Pseudomonadales	f__Moraxellaceae	g__Acinetobacter	s__Acinetobacter_sp._ACNIH1	OTU198	1	0	1	0	0	1	0	1	0	2	6
d__Bacteria	k__norank_d__Bacteria	p__Firmicutes	c__Bacilli	o__Lactobacillales	f__Leuconostocaceae	g__Weissella	s__Weissella_paramesenteroides	OTU193	0	0	2	0	0	0	0	0	0	0	2
d__Bacteria	k__norank_d__Bacteria	p__Patescibacteria	c__Saccharimonadia	o__Saccharimonadales	f__norank_o__Saccharimonadales	g__norank_f__norank_o__Saccharimonadales	s__uncultured_bacterium_g__norank_f__norank_o__Saccharimonadales	OTU520	0	0	2	1	0	0	0	0	0	0	3
d__Bacteria	k__norank_d__Bacteria	p__Bacteroidota	c__Bacteroidia	o__Flavobacteriales	f__Flavobacteriaceae	g__Flavobacterium	s__unclassified_g__Flavobacterium	OTU1024	0	0	1	0	0	0	0	0	0	9	10
d__Bacteria	k__norank_d__Bacteria	p__Proteobacteria	c__Gammaproteobacteria	o__Methylococcales	f__Methylomonadaceae	g__unclassified_f__Methylomonadaceae	s__unclassified_f__Methylomonadaceae	OTU239	0	0	3	0	0	0	0	0	0	2	5
d__Bacteria	k__norank_d__Bacteria	p__Gemmatimonadota	c__Gemmatimonadetes	o__Gemmatimonadales	f__Gemmatimonadaceae	g__norank_f__Gemmatimonadaceae	s__metagenome_g__norank_f__Gemmatimonadaceae	OTU968	0	0	0	0	0	0	0	1	0	0	1
d__Bacteria	k__norank_d__Bacteria	p__Proteobacteria	c__Gammaproteobacteria	o__Thiotrichales	f__Thiotrichaceae	g__Thiothrix	s__unclassified_g__Thiothrix	OTU990	0	0	1	1	0	0	0	0	0	1	3
d__Bacteria	k__norank_d__Bacteria	p__Firmicutes	c__Limnochordia	o__norank_c__Limnochordia	f__norank_o__norank_c__Limnochordia	g__Hydrogenispora	s__uncultured_Firmicutes_bacterium_g__Hydrogenispora	OTU597	0	0	0	0	2	0	0	0	0	0	2
d__Bacteria	k__norank_d__Bacteria	p__Proteobacteria	c__Gammaproteobacteria	o__Enterobacterales	f__Enterobacteriaceae	g__Enterobacter	s__unclassified_g__Enterobacter	OTU422	2114	2541	5	6	2	127	44	13	508	2	5362
d__Bacteria	k__norank_d__Bacteria	p__Firmicutes	c__Clostridia	o__Lachnospirales	f__Lachnospiraceae	g__Tyzzerella	s__unclassified_g__Tyzzerella	OTU753	503	695	1837	118	674	59	743	550	230	178	5587
d__Bacteria	k__norank_d__Bacteria	p__Firmicutes	c__Bacilli	o__Bacillales	f__Bacillaceae	g__Bacillus	s__Bacillus_selenatarsenatis	OTU436	1	0	0	0	0	0	0	4	0	1	6
d__Bacteria	k__norank_d__Bacteria	p__Armatimonadota	c__unclassified_p__Armatimonadota	o__unclassified_p__Armatimonadota	f__unclassified_p__Armatimonadota	g__unclassified_p__Armatimonadota	s__unclassified_p__Armatimonadota	OTU1092	0	0	0	0	0	0	0	0	0	2	2
d__Bacteria	k__norank_d__Bacteria	p__Proteobacteria	c__Gammaproteobacteria	o__Methylococcales	f__Methylomonadaceae	g__Crenothrix	s__Crenothrix_polyspora	OTU912	0	0	8	0	0	0	0	0	0	0	8
d__Bacteria	k__norank_d__Bacteria	p__Proteobacteria	c__Alphaproteobacteria	o__Rhodobacterales	f__Rhodobacteraceae	g__Roseovarius	s__unclassified_g__Roseovarius	OTU905	2	26	5	96	6	0	3	5	0	0	143
d__Bacteria	k__norank_d__Bacteria	p__Proteobacteria	c__Gammaproteobacteria	o__Xanthomonadales	f__Xanthomonadaceae	g__unclassified_f__Xanthomonadaceae	s__unclassified_f__Xanthomonadaceae	OTU910	0	1	0	0	0	0	0	0	0	0	1
d__Bacteria	k__norank_d__Bacteria	p__Proteobacteria	c__Gammaproteobacteria	o__Competibacterales	f__Competibacteraceae	g__Candidatus_Competibacter	s__uncultured_bacterium_g__Candidatus_Competibacter	OTU992	0	0	1	0	0	0	0	0	0	1	2
d__Bacteria	k__norank_d__Bacteria	p__Proteobacteria	c__Alphaproteobacteria	o__Rhizobiales	f__Hyphomicrobiaceae	g__unclassified_f__Hyphomicrobiaceae	s__unclassified_f__Hyphomicrobiaceae	OTU225	0	0	1	0	0	0	0	0	0	1	2
d__Bacteria	k__norank_d__Bacteria	p__Verrucomicrobiota	c__Verrucomicrobiae	o__Verrucomicrobiales	f__Rubritaleaceae	g__Luteolibacter	s__uncultured_bacterium_g__Luteolibacter	OTU1085	0	0	0	4	0	0	0	0	0	1	5
d__Bacteria	k__norank_d__Bacteria	p__Proteobacteria	c__Alphaproteobacteria	o__Alphaproteobacteria_Incertae_Sedis	f__unclassified_o__Alphaproteobacteria_Incertae_Sedis	g__Neomegalonema	s__unclassified_g__Neomegalonema	OTU282	0	0	5	0	0	0	0	0	0	0	5
d__Bacteria	k__norank_d__Bacteria	p__Patescibacteria	c__Saccharimonadia	o__Saccharimonadales	f__LWQ8	g__norank_f__LWQ8	s__uncultured_bacterium_g__norank_f__LWQ8	OTU602	47	61	3	82	34	0	3	2	2	0	234
d__Bacteria	k__norank_d__Bacteria	p__Proteobacteria	c__Gammaproteobacteria	o__Methylococcales	f__Methylococcaceae	g__Methyloparacoccus	s__uncultured_bacterium_g__Methyloparacoccus	OTU925	1	0	10	10	4	0	0	0	1	1	27
d__Bacteria	k__norank_d__Bacteria	p__Actinobacteriota	c__Actinobacteria	o__Micromonosporales	f__Micromonosporaceae	g__norank_f__Micromonosporaceae	s__uncultured_bacterium_g__norank_f__Micromonosporaceae	OTU1054	0	0	0	1	1	0	0	9	1	0	12
d__Bacteria	k__norank_d__Bacteria	p__Patescibacteria	c__CPR2	o__norank_c__CPR2	f__norank_o__norank_c__CPR2	g__norank_f__norank_o__norank_c__CPR2	s__uncultured_microorganism_g__norank_f__norank_o__norank_c__CPR2	OTU984	0	0	0	2	0	0	0	1	1	0	4
d__Bacteria	k__norank_d__Bacteria	p__Patescibacteria	c__Saccharimonadia	o__Saccharimonadales	f__unclassified_o__Saccharimonadales	g__unclassified_o__Saccharimonadales	s__unclassified_o__Saccharimonadales	OTU34	0	0	0	1	0	0	0	0	0	0	1
d__Bacteria	k__norank_d__Bacteria	p__Firmicutes	c__Bacilli	o__Entomoplasmatales	f__Entomoplasmatales_Incertae_Sedis	g__Candidatus_Hepatoplasma	s__uncultured_bacterium_g__Candidatus_Hepatoplasma	OTU919	1840	964	1560	2739	3079	495	2053	11011	13414	0	37155
d__Bacteria	k__norank_d__Bacteria	p__Bacteroidota	c__Bacteroidia	o__Flavobacteriales	f__Crocinitomicaceae	g__Fluviicola	s__uncultured_bacterium_g__Fluviicola	OTU323	1	0	0	0	0	0	0	0	0	0	1
d__Bacteria	k__norank_d__Bacteria	p__Proteobacteria	c__Alphaproteobacteria	o__Caulobacterales	f__Caulobacteraceae	g__Brevundimonas	s__Brevundimonas_diminuta	OTU672	0	0	38	1	0	0	0	0	0	2	41
d__Bacteria	k__norank_d__Bacteria	p__Firmicutes	c__Bacilli	o__Staphylococcales	f__Staphylococcaceae	g__Macrococcus	s__Macrococcus_caseolyticus	OTU686	0	0	2	0	0	0	0	1	0	0	3
d__Bacteria	k__norank_d__Bacteria	p__Firmicutes	c__Clostridia	o__Peptostreptococcales-Tissierellales	f__Fusibacteraceae	g__Fusibacter	s__unclassified_g__Fusibacter	OTU1112	0	0	0	0	0	0	0	1	0	0	1
d__Bacteria	k__norank_d__Bacteria	p__Proteobacteria	c__Alphaproteobacteria	o__Rhodobacterales	f__Rhodobacteraceae	g__unclassified_f__Rhodobacteraceae	s__unclassified_f__Rhodobacteraceae	OTU598	2	3	13	12	4	0	0	2	0	10	46
d__Bacteria	k__norank_d__Bacteria	p__Bacteroidota	c__SJA-28	o__norank_c__SJA-28	f__norank_o__norank_c__SJA-28	g__norank_f__norank_o__norank_c__SJA-28	s__unclassified_g__norank_f__norank_o__norank_c__SJA-28	OTU751	0	0	0	0	0	0	0	0	0	1	1
d__Bacteria	k__norank_d__Bacteria	p__Proteobacteria	c__Alphaproteobacteria	o__Rhizobiales	f__Beijerinckiaceae	g__Microvirga	s__uncultured_bacterium_g__Microvirga	OTU895	0	0	3	0	0	0	1	0	0	0	4
d__Bacteria	k__norank_d__Bacteria	p__Actinobacteriota	c__Coriobacteriia	o__OPB41	f__norank_o__OPB41	g__norank_f__norank_o__OPB41	s__uncultured_bacterium_g__norank_f__norank_o__OPB41	OTU69	0	0	0	1	0	0	0	0	0	0	1
d__Bacteria	k__norank_d__Bacteria	p__Bacteroidota	c__Bacteroidia	o__Sphingobacteriales	f__Sphingobacteriaceae	g__Sphingobacterium	s__Sphingobacterium_mizutaii	OTU478	0	1	17	0	0	0	0	0	0	0	18
d__Bacteria	k__norank_d__Bacteria	p__Patescibacteria	c__Saccharimonadia	o__Saccharimonadales	f__unclassified_o__Saccharimonadales	g__unclassified_o__Saccharimonadales	s__unclassified_o__Saccharimonadales	OTU608	0	1	0	5	1	0	0	1	0	0	8
d__Bacteria	k__norank_d__Bacteria	p__Bacteroidota	c__Bacteroidia	o__Sphingobacteriales	f__Lentimicrobiaceae	g__norank_f__Lentimicrobiaceae	s__unclassified_g__norank_f__Lentimicrobiaceae	OTU626	0	0	0	0	0	0	0	0	0	1	1
d__Bacteria	k__norank_d__Bacteria	p__Patescibacteria	c__CPR2	o__norank_c__CPR2	f__norank_o__norank_c__CPR2	g__norank_f__norank_o__norank_c__CPR2	s__uncultured_bacterium_g__norank_f__norank_o__norank_c__CPR2	OTU1011	0	0	0	1	0	0	0	0	0	2	3
d__Bacteria	k__norank_d__Bacteria	p__Proteobacteria	c__Alphaproteobacteria	o__Rhodobacterales	f__Rhodobacteraceae	g__Tropicimonas	s__uncultured_bacterium_g__Tropicimonas	OTU877	1	0	2	3	2	0	2	0	2	1	13
d__Bacteria	k__norank_d__Bacteria	p__Bacteroidota	c__Bacteroidia	o__Sphingobacteriales	f__Sphingobacteriaceae	g__Sphingobacterium	s__unclassified_g__Sphingobacterium	OTU472	0	1	12	0	0	0	0	0	0	1	14
d__Bacteria	k__norank_d__Bacteria	p__Myxococcota	c__Polyangia	o__Nannocystales	f__Nannocystaceae	g__Nannocystis	s__metagenome_g__Nannocystis	OTU656	0	0	1	0	0	0	0	0	0	0	1
d__Bacteria	k__norank_d__Bacteria	p__Patescibacteria	c__Saccharimonadia	o__Saccharimonadales	f__Saccharimonadaceae	g__TM7a	s__uncultured_bacterium_g__TM7a	OTU463	0	0	95	4	0	0	0	1	1	0	101
d__Bacteria	k__norank_d__Bacteria	p__Proteobacteria	c__Gammaproteobacteria	o__Burkholderiales	f__Comamonadaceae	g__unclassified_f__Comamonadaceae	s__unclassified_f__Comamonadaceae	OTU982	0	0	1	0	0	0	0	2	0	1	4
d__Bacteria	k__norank_d__Bacteria	p__Bacteroidota	c__Bacteroidia	o__Chitinophagales	f__Chitinophagaceae	g__unclassified_f__Chitinophagaceae	s__unclassified_f__Chitinophagaceae	OTU474	0	0	1	1	0	0	0	0	0	0	2
d__Bacteria	k__norank_d__Bacteria	p__Proteobacteria	c__Gammaproteobacteria	o__Competibacterales	f__Competibacteraceae	g__Candidatus_Competibacter	s__uncultured_gamma_proteobacterium_g__Candidatus_Competibacter	OTU924	0	0	0	2	0	0	0	0	0	2	4
d__Bacteria	k__norank_d__Bacteria	p__Bdellovibrionota	c__Oligoflexia	o__0319-6G20	f__norank_o__0319-6G20	g__norank_f__norank_o__0319-6G20	s__unclassified_g__norank_f__norank_o__0319-6G20	OTU1065	0	0	1	0	0	0	0	0	1	0	2
d__Bacteria	k__norank_d__Bacteria	p__Proteobacteria	c__Gammaproteobacteria	o__Aeromonadales	f__Aeromonadaceae	g__Aeromonas	s__unclassified_g__Aeromonas	OTU1080	0	0	0	0	0	0	0	0	0	2	2
d__Bacteria	k__norank_d__Bacteria	p__Proteobacteria	c__Gammaproteobacteria	o__Xanthomonadales	f__Xanthomonadaceae	g__Stenotrophomonas	s__Flavobacterium_lutescens_g__Stenotrophomonas	OTU495	0	0	4	1	0	0	0	1	0	1	7
d__Bacteria	k__norank_d__Bacteria	p__Firmicutes	c__Bacilli	o__Bacillales	f__Sporolactobacillaceae	g__Sporolactobacillus	s__Sporolactobacillus_inulinus	OTU216	0	0	0	0	0	0	0	0	0	1	1
d__Bacteria	k__norank_d__Bacteria	p__Bdellovibrionota	c__Oligoflexia	o__0319-6G20	f__norank_o__0319-6G20	g__norank_f__norank_o__0319-6G20	s__bacterium_enrichment_culture_clone_B1262011	OTU467	1	1	2	4	1	0	0	0	1	0	10
d__Bacteria	k__norank_d__Bacteria	p__Proteobacteria	c__Gammaproteobacteria	o__Legionellales	f__Legionellaceae	g__Legionella	s__uncultured_bacterium_g__Legionella	OTU691	0	0	0	0	1	0	0	0	0	0	1
d__Bacteria	k__norank_d__Bacteria	p__Proteobacteria	c__Alphaproteobacteria	o__unclassified_c__Alphaproteobacteria	f__unclassified_c__Alphaproteobacteria	g__unclassified_c__Alphaproteobacteria	s__unclassified_c__Alphaproteobacteria	OTU1046	3	108	243	164	1243	77	78	265	291	658	3130
d__Bacteria	k__norank_d__Bacteria	p__Patescibacteria	c__Saccharimonadia	o__Saccharimonadales	f__norank_o__Saccharimonadales	g__norank_f__norank_o__Saccharimonadales	s__uncultured_organism_g__norank_f__norank_o__Saccharimonadales	OTU1139	0	4	11	49	2	0	1	1	0	0	68
d__Bacteria	k__norank_d__Bacteria	p__Proteobacteria	c__Alphaproteobacteria	o__Rhizobiales	f__Rhizobiaceae	g__Allorhizobium-Neorhizobium-Pararhizobium-Rhizobium	s__unclassified_g__Allorhizobium-Neorhizobium-Pararhizobium-Rhizobium	OTU613	0	0	4	0	1	0	0	1	0	0	6
d__Bacteria	k__norank_d__Bacteria	p__Firmicutes	c__Clostridia	o__Lachnospirales	f__Lachnospiraceae	g__unclassified_f__Lachnospiraceae	s__unclassified_f__Lachnospiraceae	OTU894	1	0	0	0	0	0	0	1	0	0	2
d__Bacteria	k__norank_d__Bacteria	p__Proteobacteria	c__Gammaproteobacteria	o__Steroidobacterales	f__Steroidobacteraceae	g__norank_f__Steroidobacteraceae	s__uncultured_gamma_proteobacterium_g__norank_f__Steroidobacteraceae	OTU933	11	1	7	5	14	1	0	2	4	23	68
d__Bacteria	k__norank_d__Bacteria	p__Bacteroidota	c__Bacteroidia	o__Chitinophagales	f__Saprospiraceae	g__norank_f__Saprospiraceae	s__unclassified_g__norank_f__Saprospiraceae	OTU796	1	0	0	0	0	1	0	1	0	0	3
d__Bacteria	k__norank_d__Bacteria	p__Bacteroidota	c__Bacteroidia	o__Bacteroidales	f__Dysgonomonadaceae	g__Dysgonomonas	s__uncultured_bacterium_g__Dysgonomonas	OTU429	3522	4090	2396	642	591	898	279	770	1236	178	14602
d__Bacteria	k__norank_d__Bacteria	p__Firmicutes	c__Bacilli	o__Staphylococcales	f__Staphylococcaceae	g__Staphylococcus	s__Staphylococcus_saprophyticus_g__Staphylococcus	OTU676	1	3	214	11	3	0	1	6	3	0	242
d__Bacteria	k__norank_d__Bacteria	p__Proteobacteria	c__Gammaproteobacteria	o__Cellvibrionales	f__Halieaceae	g__unclassified_f__Halieaceae	s__unclassified_f__Halieaceae	OTU743	0	0	0	1	0	0	0	0	0	0	1
d__Bacteria	k__norank_d__Bacteria	p__Firmicutes	c__Bacilli	o__Mycoplasmatales	f__Mycoplasmataceae	g__norank_f__Mycoplasmataceae	s__uncultured_Firmicutes_bacterium_g__norank_f__Mycoplasmataceae	OTU30	0	6	0	21	9	7	3	12	0	0	58
d__Bacteria	k__norank_d__Bacteria	p__Firmicutes	c__Bacilli	o__Mycoplasmatales	f__Mycoplasmataceae	g__Candidatus_Bacilloplasma	s__uncultured_bacterium_g__Candidatus_Bacilloplasma	OTU542	0	0	0	2	0	0	0	0	0	0	2
d__Bacteria	k__norank_d__Bacteria	p__Firmicutes	c__Bacilli	o__Mycoplasmatales	f__Mycoplasmataceae	g__Candidatus_Bacilloplasma	s__uncultured_bacterium_g__Candidatus_Bacilloplasma	OTU546	5538	5208	2870	2583	70	520	251	427	37	0	17504
d__Bacteria	k__norank_d__Bacteria	p__Actinobacteriota	c__Acidimicrobiia	o__Microtrichales	f__Ilumatobacteraceae	g__CL500-29_marine_group	s__uncultured_bacterium_g__CL500-29_marine_group	OTU118	0	0	2	0	0	0	0	0	0	0	2
d__Bacteria	k__norank_d__Bacteria	p__Patescibacteria	c__WWE3	o__norank_c__WWE3	f__norank_o__norank_c__WWE3	g__norank_f__norank_o__norank_c__WWE3	s__unclassified_g__norank_f__norank_o__norank_c__WWE3	OTU1075	0	0	0	0	0	0	0	0	0	1	1
d__Bacteria	k__norank_d__Bacteria	p__Proteobacteria	c__Alphaproteobacteria	o__Rhodobacterales	f__Rhodobacteraceae	g__Rhodobacter	s__uncultured_bacterium_g__Rhodobacter	OTU665	7	5	30	11	6	0	2	7	3	11	82
d__Bacteria	k__norank_d__Bacteria	p__Proteobacteria	c__Alphaproteobacteria	o__Rhizobiales	f__Rhizobiaceae	g__Pseudochrobactrum	s__Pseudochrobactrum_saccharolyticum_g__Pseudochrobactrum	OTU711	0	0	52	2	1	0	2	0	1	0	58
d__Bacteria	k__norank_d__Bacteria	p__Proteobacteria	c__Alphaproteobacteria	o__Rickettsiales	f__norank_o__Rickettsiales	g__norank_f__norank_o__Rickettsiales	s__uncultured_bacterium_g__norank_f__norank_o__Rickettsiales	OTU321	14	0	4	1	3	2	5	6	0	5	40
d__Bacteria	k__norank_d__Bacteria	p__Actinobacteriota	c__Acidimicrobiia	o__Microtrichales	f__unclassified_o__Microtrichales	g__unclassified_o__Microtrichales	s__unclassified_o__Microtrichales	OTU1025	0	0	1	0	0	0	0	0	0	0	1
d__Bacteria	k__norank_d__Bacteria	p__Bacteroidota	c__Bacteroidia	o__Chitinophagales	f__Chitinophagaceae	g__Taibaiella	s__Taibaiella_sp.	OTU1032	0	1	0	0	0	0	0	0	0	0	1
d__Bacteria	k__norank_d__Bacteria	p__Bacteroidota	c__Bacteroidia	o__Cytophagales	f__Spirosomaceae	g__Taeseokella	s__unclassified_g__Taeseokella	OTU1084	1	0	0	0	0	0	0	0	0	3	4
d__Bacteria	k__norank_d__Bacteria	p__Proteobacteria	c__Alphaproteobacteria	o__Rhodobacterales	f__Rhodobacteraceae	g__unclassified_f__Rhodobacteraceae	s__unclassified_f__Rhodobacteraceae	OTU435	8	88	22	142	12	3	12	6	0	0	293
d__Bacteria	k__norank_d__Bacteria	p__Chloroflexi	c__Anaerolineae	o__Anaerolineales	f__Anaerolineaceae	g__norank_f__Anaerolineaceae	s__uncultured_prokaryote_g__norank_f__Anaerolineaceae	OTU1102	3	0	2	2	0	0	0	0	0	3	10
d__Bacteria	k__norank_d__Bacteria	p__Bdellovibrionota	c__Bdellovibrionia	o__Bacteriovoracales	f__Bacteriovoracaceae	g__Peredibacter	s__unclassified_g__Peredibacter	OTU485	0	0	6	0	0	0	0	0	0	0	6
d__Bacteria	k__norank_d__Bacteria	p__WS2	c__norank_p__WS2	o__norank_c__norank_p__WS2	f__norank_o__norank_c__norank_p__WS2	g__norank_f__norank_o__norank_c__norank_p__WS2	s__unclassified_g__norank_f__norank_o__norank_c__norank_p__WS2	OTU1017	0	0	0	0	0	0	0	0	0	2	2
d__Bacteria	k__norank_d__Bacteria	p__Chloroflexi	c__KD4-96	o__norank_c__KD4-96	f__norank_o__norank_c__KD4-96	g__norank_f__norank_o__norank_c__KD4-96	s__uncultured_Chloroflexi_bacterium_g__norank_f__norank_o__norank_c__KD4-96	OTU798	0	0	0	2	0	0	0	0	0	1	3
d__Bacteria	k__norank_d__Bacteria	p__Proteobacteria	c__Gammaproteobacteria	o__Burkholderiales	f__Burkholderiaceae	g__Ralstonia	s__Ralstonia_pickettii	OTU742	0	0	0	0	0	0	1	2	0	0	3
d__Bacteria	k__norank_d__Bacteria	p__Actinobacteriota	c__Actinobacteria	o__Micrococcales	f__Brevibacteriaceae	g__Brevibacterium	s__Brevibacterium_epidermidis	OTU678	0	0	14	3	0	0	0	1	1	0	19
d__Bacteria	k__norank_d__Bacteria	p__Firmicutes	c__Bacilli	o__Lactobacillales	f__Streptococcaceae	g__Streptococcus	s__unclassified_g__Streptococcus	OTU713	0	0	0	0	1	0	0	0	0	0	1
d__Bacteria	k__norank_d__Bacteria	p__Proteobacteria	c__Alphaproteobacteria	o__Rhizobiales	f__unclassified_o__Rhizobiales	g__unclassified_o__Rhizobiales	s__unclassified_o__Rhizobiales	OTU1018	1	0	4	3	0	0	1	0	0	2	11
d__Bacteria	k__norank_d__Bacteria	p__Bacteroidota	c__Bacteroidia	o__Chitinophagales	f__Chitinophagaceae	g__unclassified_f__Chitinophagaceae	s__unclassified_f__Chitinophagaceae	OTU464	0	0	1	0	0	0	0	0	0	1	2
d__Bacteria	k__norank_d__Bacteria	p__Proteobacteria	c__Alphaproteobacteria	o__unclassified_c__Alphaproteobacteria	f__unclassified_c__Alphaproteobacteria	g__unclassified_c__Alphaproteobacteria	s__unclassified_c__Alphaproteobacteria	OTU605	0	0	0	0	1	0	0	0	0	0	1
d__Bacteria	k__norank_d__Bacteria	p__Bacteroidota	c__Bacteroidia	o__Chitinophagales	f__Chitinophagaceae	g__Aurantisolimonas	s__uncultured_bacterium_g__Aurantisolimonas	OTU526	0	0	0	1	0	0	0	0	0	0	1
d__Bacteria	k__norank_d__Bacteria	p__Verrucomicrobiota	c__Verrucomicrobiae	o__Verrucomicrobiales	f__Rubritaleaceae	g__norank_f__Rubritaleaceae	s__uncultured_bacterium_g__norank_f__Rubritaleaceae	OTU12	0	0	0	0	0	0	0	0	0	1	1
d__Bacteria	k__norank_d__Bacteria	p__Cyanobacteria	c__Cyanobacteriia	o__Chloroplast	f__norank_o__Chloroplast	g__norank_f__norank_o__Chloroplast	s__Pectinodesmus_pectinatus	OTU108	0	0	0	1	0	0	0	0	0	1	2
d__Bacteria	k__norank_d__Bacteria	p__Patescibacteria	c__Saccharimonadia	o__Saccharimonadales	f__norank_o__Saccharimonadales	g__norank_f__norank_o__Saccharimonadales	s__unclassified_g__norank_f__norank_o__Saccharimonadales	OTU413	0	0	0	1	0	0	0	0	0	0	1
d__Bacteria	k__norank_d__Bacteria	p__Proteobacteria	c__Alphaproteobacteria	o__Rhizobiales	f__unclassified_o__Rhizobiales	g__unclassified_o__Rhizobiales	s__unclassified_o__Rhizobiales	OTU74	3	2	10	11	4	2	0	1	0	0	33
d__Bacteria	k__norank_d__Bacteria	p__Proteobacteria	c__Alphaproteobacteria	o__Rhizobiales	f__Xanthobacteraceae	g__norank_f__Xanthobacteraceae	s__uncultured_bacterium_g__norank_f__Xanthobacteraceae	OTU210	0	1	0	0	1	0	0	1	0	0	3
d__Bacteria	k__norank_d__Bacteria	p__Proteobacteria	c__Gammaproteobacteria	o__Steroidobacterales	f__Steroidobacteraceae	g__norank_f__Steroidobacteraceae	s__unclassified_g__norank_f__Steroidobacteraceae	OTU994	0	0	0	1	1	0	0	0	0	0	2
d__Bacteria	k__norank_d__Bacteria	p__Actinobacteriota	c__Actinobacteria	o__Propionibacteriales	f__Nocardioidaceae	g__Aeromicrobium	s__bacterium_g__Aeromicrobium	OTU698	0	0	2	2	0	0	0	0	0	0	4
d__Bacteria	k__norank_d__Bacteria	p__Firmicutes	c__Clostridia	o__Lachnospirales	f__Lachnospiraceae	g__Tyzzerella	s__unclassified_g__Tyzzerella	OTU835	1348	676	2195	175	355	711	129	162	834	322	6907
d__Bacteria	k__norank_d__Bacteria	p__Cyanobacteria	c__Cyanobacteriia	o__Cyanobacteriales	f__Nostocaceae	g__Sphaerospermopsis_BCCUSP55	s__uncultured_bacterium_g__Sphaerospermopsis_BCCUSP55	OTU768	0	0	0	0	0	0	0	0	1	0	1
d__Bacteria	k__norank_d__Bacteria	p__Actinobacteriota	c__Actinobacteria	o__Corynebacteriales	f__Dietziaceae	g__Dietzia	s__Dietzia_lutea	OTU468	0	1	37	0	0	0	0	1	0	0	39
d__Bacteria	k__norank_d__Bacteria	p__Actinobacteriota	c__Thermoleophilia	o__Gaiellales	f__norank_o__Gaiellales	g__norank_f__norank_o__Gaiellales	s__uncultured_Rubrobacteraceae_bacterium_g__norank	OTU246	2	1	1	4	0	0	0	1	0	1	10
d__Bacteria	k__norank_d__Bacteria	p__Chloroflexi	c__Anaerolineae	o__Anaerolineales	f__Anaerolineaceae	g__norank_f__Anaerolineaceae	s__uncultured_Anaerolineaceae_bacterium_g__norank_f__Anaerolineaceae	OTU782	1	0	0	3	1	0	0	0	2	4	11
d__Bacteria	k__norank_d__Bacteria	p__Proteobacteria	c__Gammaproteobacteria	o__Methylococcales	f__Methylococcaceae	g__norank_f__Methylococcaceae	s__uncultured_bacterium_g__norank_f__Methylococcaceae	OTU1058	0	0	0	0	0	0	0	0	1	0	1
d__Bacteria	k__norank_d__Bacteria	p__Myxococcota	c__Polyangia	o__Polyangiales	f__Polyangiaceae	g__Polyangium	s__metagenome_g__Polyangium	OTU277	1	0	0	0	0	0	0	0	0	0	1
d__Bacteria	k__norank_d__Bacteria	p__Firmicutes	c__Clostridia	o__Clostridiales	f__Clostridiaceae	g__Clostridium_sensu_stricto_11	s__Clostridium_sp._DY2632	OTU1140	0	1	0	0	1	0	0	1	0	0	3
d__Bacteria	k__norank_d__Bacteria	p__Firmicutes	c__Bacilli	o__Lactobacillales	f__Aerococcaceae	g__Aerococcus	s__Aerococcus_urinaeequi	OTU465	0	0	9	1	0	0	0	1	0	0	11
d__Bacteria	k__norank_d__Bacteria	p__Proteobacteria	c__Gammaproteobacteria	o__Pseudomonadales	f__Pseudomonadaceae	g__Pseudomonas	s__unclassified_g__Pseudomonas	OTU766	1	2	0	4	7	1	0	2	0	0	17
