# Supplementary material for: Effects of Dietary L-TRP on Immunity, Antioxidant Capacity and Intestinal Microbiota of the Chinese Mitten Crab (Eriocheir Sinensis) in Pond Culture
Source: Metabolites. 2022 Dec 20;13(1):1. doi: 10.3390/metabo13010001 (PMC9866439; doi:10.3390/metabo13010001)
Supplement: Supplementary file 1 [file metabolites-13-00001-s001.zip › Table S3-OTU species classification statistics in Nov..csv]

Domain	Kingdom	Phylum	Class	Order	Family	Genus	Species	OTU	C6_November	C1_November	C2_November	C3_November	C5_November	L1_November	L2_November	L3_November	L5_November	L6_November	SUM
d__Bacteria	k__norank_d__Bacteria	p__Verrucomicrobiota	c__Chlamydiae	o__Chlamydiales	f__unclassified_o__Chlamydiales	g__unclassified_o__Chlamydiales	s__unclassified_o__Chlamydiales	OTU907	0	3	0	2	0	0	0	0	0	0	5
d__Bacteria	k__norank_d__Bacteria	p__Chloroflexi	c__Anaerolineae	o__SJA-15	f__norank_o__SJA-15	g__norank_f__norank_o__SJA-15	s__uncultured_bacterium_g__norank_f__norank_o__SJA-15	OTU61	0	5	1	2	0	0	2	0	1	1	12
d__Bacteria	k__norank_d__Bacteria	p__Patescibacteria	c__Dojkabacteria	o__norank_c__Dojkabacteria	f__norank_o__norank_c__Dojkabacteria	g__norank_f__norank_o__norank_c__Dojkabacteria	s__uncultured_bacterium_g__norank_f__norank_o__norank_c__Dojkabacteria	OTU629	1	3	7	3	0	4	2	1	3	0	24
d__Bacteria	k__norank_d__Bacteria	p__Firmicutes	c__Bacilli	o__Mycoplasmatales	f__Mycoplasmataceae	g__norank_f__Mycoplasmataceae	s__uncultured_Firmicutes_bacterium_g__norank_f__Mycoplasmataceae	OTU971	81	85	104	16	6	1	50	25	991	260	1619
d__Bacteria	k__norank_d__Bacteria	p__Patescibacteria	c__Saccharimonadia	o__Saccharimonadales	f__norank_o__Saccharimonadales	g__norank_f__norank_o__Saccharimonadales	s__uncultured_bacterium_g__norank_f__norank_o__Saccharimonadales	OTU737	1	0	0	1	0	0	1	0	0	0	3
d__Bacteria	k__norank_d__Bacteria	p__Firmicutes	c__Bacilli	o__Mycoplasmatales	f__Mycoplasmataceae	g__norank_f__Mycoplasmataceae	s__uncultured_Firmicutes_bacterium_g__norank_f__Mycoplasmataceae	OTU972	1231	6	288	79	179	0	17	6	2507	93	4406
d__Bacteria	k__norank_d__Bacteria	p__Firmicutes	c__Bacilli	o__Bacillales	f__Bacillaceae	g__Halobacillus	s__unclassified_g__Halobacillus	OTU123	1	1	0	0	0	0	0	1	1	0	4
d__Bacteria	k__norank_d__Bacteria	p__Patescibacteria	c__CPR2	o__norank_c__CPR2	f__norank_o__norank_c__CPR2	g__norank_f__norank_o__norank_c__CPR2	s__uncultured_bacterium_g__norank_f__norank_o__norank_c__CPR2	OTU988	2	8	0	4	0	0	5	5	5	1	30
d__Bacteria	k__norank_d__Bacteria	p__Chloroflexi	c__KD4-96	o__norank_c__KD4-96	f__norank_o__norank_c__KD4-96	g__norank_f__norank_o__norank_c__KD4-96	s__uncultured_bacterium_g__norank_f__norank_o__norank_c__KD4-96	OTU73	3	17	3	6	0	2	6	4	1	0	42
d__Bacteria	k__norank_d__Bacteria	p__Firmicutes	c__Clostridia	o__Christensenellales	f__Christensenellaceae	g__Christensenellaceae_R-7_group	s__uncultured_archaeon_g__Christensenellaceae_R-7_group	OTU763	0	5	0	0	1	0	2	0	1	1	10
d__Bacteria	k__norank_d__Bacteria	p__Acidobacteriota	c__Vicinamibacteria	o__Vicinamibacterales	f__Vicinamibacteraceae	g__Luteitalea	s__uncultured_bacterium_g__Luteitalea	OTU26	2	1	4	1	0	0	0	0	0	0	8
d__Bacteria	k__norank_d__Bacteria	p__Bacteroidota	c__Bacteroidia	o__Chitinophagales	f__Saprospiraceae	g__norank_f__Saprospiraceae	s__unclassified_g__norank_f__Saprospiraceae	OTU160	0	0	0	0	0	0	1	0	0	0	1
d__Bacteria	k__norank_d__Bacteria	p__Bacteroidota	c__Bacteroidia	o__Chitinophagales	f__norank_o__Chitinophagales	g__norank_f__norank_o__Chitinophagales	s__uncultured_Cytophagales_bacterium_g__norank_f__norank	OTU39	2	0	1	0	0	0	0	0	0	0	3
d__Bacteria	k__norank_d__Bacteria	p__Chloroflexi	c__Anaerolineae	o__Anaerolineales	f__Anaerolineaceae	g__norank_f__Anaerolineaceae	s__unclassified_g__norank_f__Anaerolineaceae	OTU1121	1	11	1	2	0	1	2	1	2	1	22
d__Bacteria	k__norank_d__Bacteria	p__Nitrospinota	c__P9X2b3D02	o__norank_c__P9X2b3D02	f__norank_o__norank_c__P9X2b3D02	g__norank_f__norank_o__norank_c__P9X2b3D02	s__uncultured_prokaryote_g__norank_f__norank_o__norank_c__P9X2b3D02	OTU738	1	2	1	1	0	1	1	0	0	0	7
d__Bacteria	k__norank_d__Bacteria	p__Firmicutes	c__Negativicutes	o__Veillonellales-Selenomonadales	f__Sporomusaceae	g__Anaerosinus	s__uncultured_bacterium_g__Anaerosinus	OTU862	0	1	0	1	0	0	0	0	0	0	2
d__Bacteria	k__norank_d__Bacteria	p__Bdellovibrionota	c__Oligoflexia	o__0319-6G20	f__norank_o__0319-6G20	g__norank_f__norank_o__0319-6G20	s__unclassified_g__norank_f__norank_o__0319-6G20	OTU174	0	0	0	0	0	0	0	0	1	0	1
d__Bacteria	k__norank_d__Bacteria	p__Firmicutes	c__Bacilli	o__Mycoplasmatales	f__Mycoplasmataceae	g__norank_f__Mycoplasmataceae	s__uncultured_bacterium_g__norank_f__Mycoplasmataceae	OTU454	3050	351	27	696	275	115	49	0	267	12	4842
d__Bacteria	k__norank_d__Bacteria	p__Actinobacteriota	c__RBG-16-55-12	o__norank_c__RBG-16-55-12	f__norank_o__norank_c__RBG-16-55-12	g__norank_f__norank_o__norank_c__RBG-16-55-12	s__uncultured_bacterium_g__norank_f__norank_o__norank_c__RBG-16-55-12	OTU1047	0	3	2	3	1	0	2	0	1	0	12
d__Bacteria	k__norank_d__Bacteria	p__Actinobacteriota	c__Actinobacteria	o__Kineosporiales	f__Kineosporiaceae	g__unclassified_f__Kineosporiaceae	s__unclassified_f__Kineosporiaceae	OTU85	12	19	0	0	0	0	1	0	0	1	33
d__Bacteria	k__norank_d__Bacteria	p__Actinobacteriota	c__Actinobacteria	o__PeM15	f__norank_o__PeM15	g__norank_f__norank_o__PeM15	s__metagenome_g__norank_f__norank_o__PeM15	OTU1027	0	0	0	0	0	0	0	1	1	0	2
d__Bacteria	k__norank_d__Bacteria	p__Acidobacteriota	c__Blastocatellia	o__Blastocatellales	f__Blastocatellaceae	g__Aridibacter	s__uncultured_bacterium_g__Aridibacter	OTU576	0	0	0	0	3	0	0	0	0	0	3
d__Bacteria	k__norank_d__Bacteria	p__SAR324_cladeMarine_group_B	c__norank_p__SAR324_cladeMarine_group_B	o__norank_c__norank_p__SAR324_cladeMarine_group_B	f__norank_o__norank_c__norank_p__SAR324_cladeMarine_group_B	g__norank_f__norank_o__norank_c__norank_p__SAR324_cladeMarine_group_B	s__uncultured_prokaryote_g__norank_f__norank_o__norank_c__norank_p__SAR324_cladeMarine_group_B	OTU889	1	1	0	0	0	0	0	0	1	0	3
d__Bacteria	k__norank_d__Bacteria	p__Actinobacteriota	c__Actinobacteria	o__Propionibacteriales	f__Nocardioidaceae	g__Nocardioides	s__Nocardioides_sp._g__Nocardioides	OTU700	0	0	0	0	1	0	0	0	0	0	1
d__Bacteria	k__norank_d__Bacteria	p__Bacteroidota	c__Bacteroidia	o__Flavobacteriales	f__Weeksellaceae	g__unclassified_f__Weeksellaceae	s__unclassified_f__Weeksellaceae	OTU271	0	0	10	0	0	2	0	0	0	0	12
d__Bacteria	k__norank_d__Bacteria	p__Firmicutes	c__Clostridia	o__Peptostreptococcales-Tissierellales	f__Anaerovoracaceae	g__Eubacterium_brachy_group	s__uncultured_bacterium_g__Eubacterium_brachy_group	OTU803	5	0	1	4	0	0	0	1	1	0	12
d__Bacteria	k__norank_d__Bacteria	p__Desulfobacterota	c__norank_p__Desulfobacterota	o__norank_c__norank_p__Desulfobacterota	f__norank_o__norank_c__norank_p__Desulfobacterota	g__norank_f__norank_o__norank_c__norank_p__Desulfobacterota	s__uncultured_Desulfuromonadales_bacterium_g__norank_f__norank_o__norank_c__norank_p__Desulfobacterota	OTU833	0	0	0	0	0	0	0	0	0	1	1
d__Bacteria	k__norank_d__Bacteria	p__Fusobacteriota	c__Fusobacteriia	o__Fusobacteriales	f__Fusobacteriaceae	g__Cetobacterium	s__uncultured_bacterium_g__Cetobacterium	OTU294	0	4	2	4	0	0	0	0	3	0	13
d__Bacteria	k__norank_d__Bacteria	p__Acidobacteriota	c__Vicinamibacteria	o__Vicinamibacterales	f__Vicinamibacteraceae	g__norank_f__Vicinamibacteraceae	s__unclassified_g__norank_f__Vicinamibacteraceae	OTU244	1	5	3	0	0	0	0	0	0	0	9
d__Bacteria	k__norank_d__Bacteria	p__unclassified_k__norank_d__Bacteria	c__unclassified_k__norank_d__Bacteria	o__unclassified_k__norank_d__Bacteria	f__unclassified_k__norank_d__Bacteria	g__unclassified_k__norank_d__Bacteria	s__unclassified_k__norank_d__Bacteria	OTU99	0	2	0	0	0	0	0	0	0	1	3
d__Bacteria	k__norank_d__Bacteria	p__Actinobacteriota	c__WCHB1-81	o__norank_c__WCHB1-81	f__norank_o__norank_c__WCHB1-81	g__norank_f__norank_o__norank_c__WCHB1-81	s__uncultured_bacterium_g__norank_f__norank_o__norank_c__WCHB1-81	OTU533	0	0	0	0	0	0	1	0	0	0	1
d__Bacteria	k__norank_d__Bacteria	p__Firmicutes	c__Bacilli	o__Mycoplasmatales	f__Mycoplasmataceae	g__Candidatus_Bacilloplasma	s__uncultured_bacterium_g__Candidatus_Bacilloplasma	OTU832	14	284	149	47	7	196	118	67	1639	14	2535
d__Bacteria	k__norank_d__Bacteria	p__Chloroflexi	c__KD4-96	o__norank_c__KD4-96	f__norank_o__norank_c__KD4-96	g__norank_f__norank_o__norank_c__KD4-96	s__metagenome_g__norank_f__norank_o__norank_c__KD4-96	OTU49	9	25	2	7	0	1	5	5	1	3	58
d__Bacteria	k__norank_d__Bacteria	p__Bacteroidota	c__Bacteroidia	o__Bacteroidales	f__Prolixibacteraceae	g__Roseimarinus	s__uncultured_bacterium_g__Roseimarinus	OTU1168	1089	42	31	170	2226	190	1625	675	0	2533	8581
d__Bacteria	k__norank_d__Bacteria	p__Bacteroidota	c__Bacteroidia	o__Bacteroidales	f__Dysgonomonadaceae	g__Dysgonomonas	s__uncultured_bacterium_g__Dysgonomonas	OTU843	0	1	0	2	0	0	0	0	0	1	4
d__Bacteria	k__norank_d__Bacteria	p__Proteobacteria	c__Gammaproteobacteria	o__Methylococcales	f__Methylococcaceae	g__unclassified_f__Methylococcaceae	s__unclassified_f__Methylococcaceae	OTU1059	0	0	0	0	0	0	1	0	0	0	1
d__Bacteria	k__norank_d__Bacteria	p__Desulfobacterota	c__Syntrophobacteria	o__Syntrophobacterales	f__Syntrophobacteraceae	g__Syntrophobacter	s__uncultured_bacterium_g__Syntrophobacter	OTU60	5	1	0	3	0	0	2	1	1	2	15
d__Bacteria	k__norank_d__Bacteria	p__Acidobacteriota	c__Vicinamibacteria	o__Subgroup_17	f__norank_o__Subgroup_17	g__norank_f__norank_o__Subgroup_17	s__uncultured_prokaryote_g__norank_f__norank_o__Subgroup_17	OTU440	0	13	2	5	0	1	0	0	1	0	22
d__Bacteria	k__norank_d__Bacteria	p__Firmicutes	c__Bacilli	o__Lactobacillales	f__Streptococcaceae	g__Lactovum	s__uncultured_bacterium_g__Lactovum	OTU367	311	241	22	118	13	60	1197	254	267	198	2681
d__Bacteria	k__norank_d__Bacteria	p__Actinobacteriota	c__Coriobacteriia	o__OPB41	f__norank_o__OPB41	g__norank_f__norank_o__OPB41	s__unclassified_g__norank_f__norank_o__OPB41	OTU868	0	0	0	0	0	0	0	1	0	0	1
d__Bacteria	k__norank_d__Bacteria	p__Actinobacteriota	c__Thermoleophilia	o__Gaiellales	f__Gaiellaceae	g__Gaiella	s__metagenome_g__Gaiella	OTU483	2	1	0	2	2	0	1	2	0	1	11
d__Bacteria	k__norank_d__Bacteria	p__Patescibacteria	c__Saccharimonadia	o__Saccharimonadales	f__norank_o__Saccharimonadales	g__norank_f__norank_o__Saccharimonadales	s__uncultured_bacterium_g__norank_f__norank_o__Saccharimonadales	OTU1115	23	6	0	0	2	0	0	0	1	4	36
d__Bacteria	k__norank_d__Bacteria	p__Firmicutes	c__Desulfitobacteriia	o__Desulfitobacteriales	f__norank_o__Desulfitobacteriales	g__TC1	s__uncultured_bacterium_g__TC1	OTU927	2	0	1	0	1	0	0	0	0	2	6
d__Bacteria	k__norank_d__Bacteria	p__Actinobacteriota	c__Thermoleophilia	o__Gaiellales	f__norank_o__Gaiellales	g__norank_f__norank_o__Gaiellales	s__metagenome_g__norank_f__norank_o__Gaiellales	OTU217	0	1	0	0	0	0	1	0	0	0	2
d__Bacteria	k__norank_d__Bacteria	p__Bacteroidota	c__Bacteroidia	o__Bacteroidales	f__Prolixibacteraceae	g__WCHB1-32	s__uncultured_bacterium_g__WCHB1-32	OTU335	0	0	0	0	0	2	0	0	0	0	2
d__Bacteria	k__norank_d__Bacteria	p__Proteobacteria	c__Gammaproteobacteria	o__Methylococcales	f__Methylomonadaceae	g__Methylobacter	s__unclassified_g__Methylobacter	OTU37	3	0	1	1	0	0	0	0	2	0	7
d__Bacteria	k__norank_d__Bacteria	p__Cyanobacteria	c__Cyanobacteriia	o__Chloroplast	f__norank_o__Chloroplast	g__norank_f__norank_o__Chloroplast	s__Oscillatoriales_cyanobacterium_HF1	OTU876	1	2	0	0	0	0	0	0	0	1	4
d__Bacteria	k__norank_d__Bacteria	p__Proteobacteria	c__Alphaproteobacteria	o__Rhizobiales	f__Rhizobiales_Incertae_Sedis	g__norank_f__Rhizobiales_Incertae_Sedis	s__metagenome_g__norank_f__Rhizobiales_Incertae_Sedis	OTU437	22	69	19	23	8	5	31	13	19	9	218
d__Bacteria	k__norank_d__Bacteria	p__Firmicutes	c__Clostridia	o__norank_c__Clostridia	f__Hungateiclostridiaceae	g__Ruminiclostridium	s__Ruminiclostridium_hungatei	OTU848	0	0	0	1	0	0	1	0	0	0	2
d__Bacteria	k__norank_d__Bacteria	p__Firmicutes	c__Bacilli	o__Bacillales	f__Bacillaceae	g__Bacillus	s__Bacillus_gibsonii	OTU1156	0	1	0	0	0	0	0	0	0	0	1
d__Bacteria	k__norank_d__Bacteria	p__Patescibacteria	c__WWE3	o__norank_c__WWE3	f__norank_o__norank_c__WWE3	g__norank_f__norank_o__norank_c__WWE3	s__unclassified_g__norank_f__norank_o__norank_c__WWE3	OTU439	0	1	0	1	0	0	1	0	0	0	3
d__Bacteria	k__norank_d__Bacteria	p__Bacteroidota	c__Bacteroidia	o__Flavobacteriales	f__Flavobacteriaceae	g__Flavobacterium	s__unclassified_g__Flavobacterium	OTU273	0	0	5	0	0	1	0	0	0	0	6
d__Bacteria	k__norank_d__Bacteria	p__Proteobacteria	c__Alphaproteobacteria	o__Defluviicoccales	f__norank_o__Defluviicoccales	g__norank_f__norank_o__Defluviicoccales	s__metagenome_g__norank_f__norank_o__Defluviicoccales	OTU399	0	0	0	0	0	0	0	0	0	1	1
d__Bacteria	k__norank_d__Bacteria	p__Firmicutes	c__Bacilli	o__Erysipelotrichales	f__Erysipelotrichaceae	g__ZOR0006	s__uncultured_bacterium_g__ZOR0006	OTU1171	0	7	21	0	0	0	0	0	0	0	28
d__Bacteria	k__norank_d__Bacteria	p__Patescibacteria	c__Saccharimonadia	o__Saccharimonadales	f__norank_o__Saccharimonadales	g__norank_f__norank_o__Saccharimonadales	s__uncultured_bacterium_g__norank_f__norank_o__Saccharimonadales	OTU530	0	1	0	1	0	0	1	0	2	0	5
d__Bacteria	k__norank_d__Bacteria	p__Bacteroidota	c__Bacteroidia	o__Bacteroidales	f__Bacteroidaceae	g__Bacteroides	s__unclassified_g__Bacteroides	OTU1051	70	20	142	57	1060	46	309	40	40	544	2328
d__Bacteria	k__norank_d__Bacteria	p__Patescibacteria	c__Microgenomatia	o__Candidatus_Pacebacteria	f__norank_o__Candidatus_Pacebacteria	g__norank_f__norank_o__Candidatus_Pacebacteria	s__uncultured_anaerobic_bacterium_g__norank_f__norank_o__Candidatus_Pacebacteria	OTU854	0	3	0	0	1	0	0	0	0	0	4
d__Bacteria	k__norank_d__Bacteria	p__Bacteroidota	c__Bacteroidia	o__Chitinophagales	f__Chitinophagaceae	g__Dinghuibacter	s__uncultured_Bacteroidetes_bacterium_g__Dinghuibacter	OTU519	0	0	0	0	0	1	0	0	0	0	1
d__Bacteria	k__norank_d__Bacteria	p__Proteobacteria	c__Gammaproteobacteria	o__Nitrosococcales	f__Nitrosococcaceae	g__CI75cm.2.12	s__uncultured_bacterium_g__CI75cm.2.12	OTU126	1	2	1	0	0	0	0	0	1	0	5
d__Bacteria	k__norank_d__Bacteria	p__Cyanobacteria	c__Cyanobacteriia	o__Chloroplast	f__norank_o__Chloroplast	g__norank_f__norank_o__Chloroplast	s__unclassified_g__norank_f__norank_o__Chloroplast	OTU1150	0	0	0	5	0	1	0	0	2	0	8
d__Bacteria	k__norank_d__Bacteria	p__Patescibacteria	c__Dojkabacteria	o__norank_c__Dojkabacteria	f__norank_o__norank_c__Dojkabacteria	g__norank_f__norank_o__norank_c__Dojkabacteria	s__uncultured_bacterium_g__norank_f__norank_o__norank_c__Dojkabacteria	OTU574	0	0	0	0	2	0	0	0	0	0	2
d__Bacteria	k__norank_d__Bacteria	p__Actinobacteriota	c__Actinobacteria	o__Micrococcales	f__Intrasporangiaceae	g__unclassified_f__Intrasporangiaceae	s__unclassified_f__Intrasporangiaceae	OTU358	14	46	3	4	0	2	17	12	1	2	101
d__Bacteria	k__norank_d__Bacteria	p__Firmicutes	c__Limnochordia	o__norank_c__Limnochordia	f__norank_o__norank_c__Limnochordia	g__Hydrogenispora	s__uncultured_bacterium_g__Hydrogenispora	OTU772	7	17	1	6	0	0	3	3	3	0	40
d__Bacteria	k__norank_d__Bacteria	p__Bacteroidota	c__Bacteroidia	o__Chitinophagales	f__Chitinophagaceae	g__Terrimonas	s__uncultured_bacterium_g__Terrimonas	OTU493	0	0	1	0	0	0	0	1	0	7	9
d__Bacteria	k__norank_d__Bacteria	p__Actinobacteriota	c__Actinobacteria	o__Propionibacteriales	f__Nocardioidaceae	g__Nocardioides	s__unclassified_g__Nocardioides	OTU839	0	0	0	0	0	0	0	1	1	3	5
d__Bacteria	k__norank_d__Bacteria	p__Proteobacteria	c__Gammaproteobacteria	o__Enterobacterales	f__Budviciaceae	g__Pragia	s__bacterium_TSA241-4	OTU1056	0	0	0	4	0	0	0	0	0	0	4
d__Bacteria	k__norank_d__Bacteria	p__Proteobacteria	c__Gammaproteobacteria	o__Methylococcales	f__Methylococcaceae	g__Methyloparacoccus	s__metagenome_g__Methyloparacoccus	OTU101	1	1	1	2	1	1	0	1	0	0	8
d__Bacteria	k__norank_d__Bacteria	p__Bacteroidota	c__Bacteroidia	o__Bacteroidales	f__Dysgonomonadaceae	g__Dysgonomonas	s__Dysgonomonas_gadei	OTU754	0	0	0	0	0	0	48	0	0	0	48
d__Bacteria	k__norank_d__Bacteria	p__Patescibacteria	c__Saccharimonadia	o__Saccharimonadales	f__norank_o__Saccharimonadales	g__norank_f__norank_o__Saccharimonadales	s__uncultured_bacterium_g__norank_f__norank_o__Saccharimonadales	OTU879	0	1	0	0	0	0	0	2	0	0	3
d__Bacteria	k__norank_d__Bacteria	p__Actinobacteriota	c__MB-A2-108	o__norank_c__MB-A2-108	f__norank_o__norank_c__MB-A2-108	g__norank_f__norank_o__norank_c__MB-A2-108	s__uncultured_bacterium_g__norank_f__norank_o__norank_c__MB-A2-108	OTU2	6	4	2	2	0	0	2	3	0	0	19
d__Bacteria	k__norank_d__Bacteria	p__Cyanobacteria	c__Cyanobacteriia	o__Chloroplast	f__norank_o__Chloroplast	g__norank_f__norank_o__Chloroplast	s__unclassified_g__norank_f__norank_o__Chloroplast	OTU238	4	11	2	0	0	0	5	3	0	1	26
d__Bacteria	k__norank_d__Bacteria	p__Firmicutes	c__Bacilli	o__Erysipelotrichales	f__Erysipelotrichaceae	g__ZOR0006	s__uncultured_bacterium_g__ZOR0006	OTU187	8010	13249	7333	738	402	2431	3468	8916	563	2803	47913
d__Bacteria	k__norank_d__Bacteria	p__Chloroflexi	c__Anaerolineae	o__SBR1031	f__norank_o__SBR1031	g__norank_f__norank_o__SBR1031	s__unclassified_g__norank_f__norank_o__SBR1031	OTU788	0	4	2	1	0	0	4	1	3	0	15
d__Bacteria	k__norank_d__Bacteria	p__Planctomycetota	c__Planctomycetes	o__Gemmatales	f__Gemmataceae	g__norank_f__Gemmataceae	s__uncultured_prokaryote_g__norank_f__Gemmataceae	OTU469	2	3	1	1	0	0	0	1	3	1	12
d__Bacteria	k__norank_d__Bacteria	p__Proteobacteria	c__Gammaproteobacteria	o__Methylococcales	f__Methylomonadaceae	g__unclassified_f__Methylomonadaceae	s__unclassified_f__Methylomonadaceae	OTU940	2	0	0	0	0	0	0	1	0	1	4
d__Bacteria	k__norank_d__Bacteria	p__Firmicutes	c__Clostridia	o__Clostridiales	f__Clostridiaceae	g__Clostridium_sensu_stricto_3	s__Clostridiaceae_bacterium_g__Clostridium_sensu_stricto_3	OTU79	1	1	0	0	1	1	0	0	0	0	4
d__Bacteria	k__norank_d__Bacteria	p__Cyanobacteria	c__Cyanobacteriia	o__Chloroplast	f__norank_o__Chloroplast	g__norank_f__norank_o__Chloroplast	s__unclassified_g__norank_f__norank_o__Chloroplast	OTU54	0	2	0	0	0	0	0	0	0	0	2
d__Bacteria	k__norank_d__Bacteria	p__Dependentiae	c__Babeliae	o__Babeliales	f__Vermiphilaceae	g__norank_f__Vermiphilaceae	s__uncultured_bacterium_g__norank_f__Vermiphilaceae	OTU923	1	0	1	1	0	0	1	0	0	0	4
d__Bacteria	k__norank_d__Bacteria	p__Proteobacteria	c__Alphaproteobacteria	o__Acetobacterales	f__Acetobacteraceae	g__norank_f__Acetobacteraceae	s__metagenome_g__norank_f__Acetobacteraceae	OTU46	0	0	0	0	1	0	0	0	0	0	1
d__Bacteria	k__norank_d__Bacteria	p__Proteobacteria	c__Gammaproteobacteria	o__Burkholderiales	f__Comamonadaceae	g__Hydrogenophaga	s__uncultured_bacterium_g__Hydrogenophaga	OTU922	8	1	36	2	8	9	1	10	3	7	85
d__Bacteria	k__norank_d__Bacteria	p__Patescibacteria	c__Saccharimonadia	o__Saccharimonadales	f__norank_o__Saccharimonadales	g__norank_f__norank_o__Saccharimonadales	s__uncultured_organism_g__norank_f__norank_o__Saccharimonadales	OTU524	8	5	0	0	1	0	0	0	0	0	14
d__Bacteria	k__norank_d__Bacteria	p__Actinobacteriota	c__Actinobacteria	o__Frankiales	f__norank_o__Frankiales	g__norank_f__norank_o__Frankiales	s__uncultured_bacterium_g__norank_f__norank_o__Frankiales	OTU380	3	1	2	2	0	0	0	2	0	1	11
d__Bacteria	k__norank_d__Bacteria	p__Proteobacteria	c__Gammaproteobacteria	o__Xanthomonadales	f__Xanthomonadaceae	g__unclassified_f__Xanthomonadaceae	s__unclassified_f__Xanthomonadaceae	OTU861	0	1	0	0	0	0	0	0	0	0	1
d__Bacteria	k__norank_d__Bacteria	p__Proteobacteria	c__Gammaproteobacteria	o__Enterobacterales	f__Enterobacteriaceae	g__Citrobacter	s__Citrobacter_freundii_g__Citrobacter	OTU168	12	5	1346	11	111	9	22	1	34	4	1555
d__Bacteria	k__norank_d__Bacteria	p__Dependentiae	c__Babeliae	o__Babeliales	f__norank_o__Babeliales	g__norank_f__norank_o__Babeliales	s__unclassified_g__norank_f__norank_o__Babeliales	OTU230	1	0	1	0	1	0	0	0	0	0	3
d__Bacteria	k__norank_d__Bacteria	p__Proteobacteria	c__Alphaproteobacteria	o__Sphingomonadales	f__Sphingomonadaceae	g__Sphingomonas	s__uncultured_Sphingomonadaceae_bacterium_g__Sphingomonas	OTU906	8	23	1	1	1	0	27	12	2	1	76
d__Bacteria	k__norank_d__Bacteria	p__Chloroflexi	c__Anaerolineae	o__norank_c__Anaerolineae	f__norank_o__norank_c__Anaerolineae	g__norank_f__norank_o__norank_c__Anaerolineae	s__uncultured_bacterium_g__norank_f__norank_o__norank_c__Anaerolineae	OTU785	3	28	6	6	1	1	8	4	11	1	69
d__Bacteria	k__norank_d__Bacteria	p__Cyanobacteria	c__Cyanobacteriia	o__Chloroplast	f__norank_o__Chloroplast	g__norank_f__norank_o__Chloroplast	s__unclassified_g__norank_f__norank_o__Chloroplast	OTU448	0	0	0	1	0	1	0	0	0	0	2
d__Bacteria	k__norank_d__Bacteria	p__Firmicutes	c__Bacilli	o__Erysipelotrichales	f__Erysipelotrichaceae	g__ZOR0006	s__Cetobacterium_sp._ZOR0034	OTU857	0	0	3	0	0	4	0	0	0	1	8
d__Bacteria	k__norank_d__Bacteria	p__Firmicutes	c__Clostridia	o__Peptococcales	f__Peptococcaceae	g__norank_f__Peptococcaceae	s__unclassified_g__norank_f__Peptococcaceae	OTU227	0	1	1	0	0	0	0	0	0	0	2
d__Bacteria	k__norank_d__Bacteria	p__Firmicutes	c__Bacilli	o__Exiguobacterales	f__Exiguobacteraceae	g__Exiguobacterium	s__Exiguobacterium_indicum	OTU885	2	3	0	1	1	0	0	3	0	0	10
d__Bacteria	k__norank_d__Bacteria	p__Firmicutes	c__Clostridia	o__Christensenellales	f__Christensenellaceae	g__Christensenellaceae_R-7_group	s__Clostridium_sp._enrichment_culture_clone_VanCtr93	OTU811	1	1	1	3	0	1	1	2	2	0	12
d__Bacteria	k__norank_d__Bacteria	p__Bacteroidota	c__Bacteroidia	o__Cytophagales	f__Spirosomaceae	g__unclassified_f__Spirosomaceae	s__unclassified_f__Spirosomaceae	OTU204	0	1	0	0	0	0	0	0	0	1	2
d__Bacteria	k__norank_d__Bacteria	p__Proteobacteria	c__Gammaproteobacteria	o__Competibacterales	f__Competibacteraceae	g__Candidatus_Competibacter	s__unclassified_g__Candidatus_Competibacter	OTU810	1	0	0	0	1	0	0	2	1	0	5
d__Bacteria	k__norank_d__Bacteria	p__Chloroflexi	c__Anaerolineae	o__SJA-15	f__norank_o__SJA-15	g__norank_f__norank_o__SJA-15	s__uncultured_soil_bacterium_g__norank_f__norank_o__SJA-15	OTU1116	7	12	3	4	0	1	5	1	7	2	42
d__Bacteria	k__norank_d__Bacteria	p__Patescibacteria	c__Dojkabacteria	o__norank_c__Dojkabacteria	f__norank_o__norank_c__Dojkabacteria	g__norank_f__norank_o__norank_c__Dojkabacteria	s__uncultured_bacterium_g__norank_f__norank_o__norank_c__Dojkabacteria	OTU279	0	0	1	0	0	0	0	1	1	0	3
d__Bacteria	k__norank_d__Bacteria	p__Acidobacteriota	c__Blastocatellia	o__Blastocatellales	f__Blastocatellaceae	g__JGI_0001001-H03	s__uncultured_bacterium_g__JGI_0001001-H03	OTU566	0	0	0	0	2	0	0	0	0	0	2
d__Bacteria	k__norank_d__Bacteria	p__Patescibacteria	c__Saccharimonadia	o__Saccharimonadales	f__norank_o__Saccharimonadales	g__norank_f__norank_o__Saccharimonadales	s__uncultured_candidate_division_WS5_bacterium	OTU787	2	0	1	1	0	0	1	2	1	0	8
d__Bacteria	k__norank_d__Bacteria	p__Chloroflexi	c__Anaerolineae	o__RBG-13-54-9	f__norank_o__RBG-13-54-9	g__norank_f__norank_o__RBG-13-54-9	s__unclassified_g__norank_f__norank_o__RBG-13-54-9	OTU372	0	1	0	0	0	0	0	0	0	0	1
d__Bacteria	k__norank_d__Bacteria	p__Patescibacteria	c__Saccharimonadia	o__Saccharimonadales	f__unclassified_o__Saccharimonadales	g__unclassified_o__Saccharimonadales	s__unclassified_o__Saccharimonadales	OTU590	0	0	0	0	1	0	0	1	0	1	3
d__Bacteria	k__norank_d__Bacteria	p__Chloroflexi	c__Anaerolineae	o__Anaerolineales	f__Anaerolineaceae	g__norank_f__Anaerolineaceae	s__uncultured_Chloroflexi_bacterium_g__norank_f__Anaerolineaceae	OTU821	0	0	0	1	0	0	0	2	0	1	4
d__Bacteria	k__norank_d__Bacteria	p__Patescibacteria	c__Saccharimonadia	o__Saccharimonadales	f__unclassified_o__Saccharimonadales	g__unclassified_o__Saccharimonadales	s__unclassified_o__Saccharimonadales	OTU1020	0	0	2	2	1	0	0	1	0	0	6
d__Bacteria	k__norank_d__Bacteria	p__Bacteroidota	c__Bacteroidia	o__Flavobacteriales	f__Weeksellaceae	g__Chryseobacterium	s__unclassified_g__Chryseobacterium	OTU1026	0	1	8	1	3	0	0	0	0	0	13
d__Bacteria	k__norank_d__Bacteria	p__Nitrospinota	c__P9X2b3D02	o__norank_c__P9X2b3D02	f__norank_o__norank_c__P9X2b3D02	g__norank_f__norank_o__norank_c__P9X2b3D02	s__uncultured_prokaryote_g__norank_f__norank_o__norank_c__P9X2b3D02	OTU81	14	55	13	9	0	4	2	1	1	0	99
d__Bacteria	k__norank_d__Bacteria	p__Proteobacteria	c__Alphaproteobacteria	o__Acetobacterales	f__Acetobacteraceae	g__Roseomonas	s__unclassified_g__Roseomonas	OTU76	0	3	0	1	0	0	0	1	1	0	6
d__Bacteria	k__norank_d__Bacteria	p__Proteobacteria	c__Alphaproteobacteria	o__Caulobacterales	f__Caulobacteraceae	g__Brevundimonas	s__Brevundimonas_vesicularis	OTU774	1	0	0	0	0	0	0	1	0	0	2
d__Bacteria	k__norank_d__Bacteria	p__Verrucomicrobiota	c__Verrucomicrobiae	o__Chthoniobacterales	f__Chthoniobacteraceae	g__unclassified_f__Chthoniobacteraceae	s__unclassified_f__Chthoniobacteraceae	OTU125	0	2	0	0	0	0	0	0	0	0	2
d__Bacteria	k__norank_d__Bacteria	p__Patescibacteria	c__Saccharimonadia	o__Saccharimonadales	f__norank_o__Saccharimonadales	g__norank_f__norank_o__Saccharimonadales	s__uncultured_bacterium_SBR2060	OTU425	5	2	0	0	0	0	0	1	0	0	8
d__Bacteria	k__norank_d__Bacteria	p__SAR324_cladeMarine_group_B	c__norank_p__SAR324_cladeMarine_group_B	o__norank_c__norank_p__SAR324_cladeMarine_group_B	f__norank_o__norank_c__norank_p__SAR324_cladeMarine_group_B	g__norank_f__norank_o__norank_c__norank_p__SAR324_cladeMarine_group_B	s__unclassified_g__norank_f__norank_o__norank_c__norank_p__SAR324_cladeMarine_group_B	OTU7	1	2	1	0	0	0	1	1	1	0	7
d__Bacteria	k__norank_d__Bacteria	p__Firmicutes	c__Clostridia	o__Clostridiales	f__Clostridiaceae	g__Clostridium_sensu_stricto_1	s__unclassified_g__Clostridium_sensu_stricto_1	OTU1055	12	9	5	10	0	3	1	13	13	4	70
d__Bacteria	k__norank_d__Bacteria	p__Proteobacteria	c__Gammaproteobacteria	o__Competibacterales	f__Competibacteraceae	g__Candidatus_Competibacter	s__uncultured_gamma_proteobacterium_g__Candidatus_Competibacter	OTU937	0	0	0	0	1	0	0	0	1	0	2
d__Bacteria	k__norank_d__Bacteria	p__Dependentiae	c__Babeliae	o__Babeliales	f__norank_o__Babeliales	g__norank_f__norank_o__Babeliales	s__unclassified_g__norank_f__norank_o__Babeliales	OTU80	0	2	0	0	0	0	0	0	0	0	2
d__Bacteria	k__norank_d__Bacteria	p__Actinobacteriota	c__Actinobacteria	o__Micrococcales	f__Microbacteriaceae	g__Microbacterium	s__Microbacterium_lacus	OTU702	0	3	0	0	0	1	0	0	0	0	4
d__Bacteria	k__norank_d__Bacteria	p__Firmicutes	c__Clostridia	o__Lachnospirales	f__Lachnospiraceae	g__Tyzzerella	s__unclassified_g__Tyzzerella	OTU845	35	247	18	22	458	165	31	6	0	107	1089
d__Bacteria	k__norank_d__Bacteria	p__Verrucomicrobiota	c__Verrucomicrobiae	o__Verrucomicrobiales	f__Verrucomicrobiaceae	g__norank_f__Verrucomicrobiaceae	s__uncultured_Verrucomicrobia_bacterium_g__norank_f__Verrucomicrobiaceae	OTU936	1	0	0	0	0	0	0	0	0	0	1
d__Bacteria	k__norank_d__Bacteria	p__Chloroflexi	c__Anaerolineae	o__Caldilineales	f__Caldilineaceae	g__norank_f__Caldilineaceae	s__metagenome_g__norank_f__Caldilineaceae	OTU814	0	3	0	0	0	0	1	4	2	0	10
d__Bacteria	k__norank_d__Bacteria	p__Proteobacteria	c__Gammaproteobacteria	o__Steroidobacterales	f__Woeseiaceae	g__Woeseia	s__uncultured_bacterium_g__Woeseia	OTU129	1	2	0	0	0	1	0	0	2	0	6
d__Bacteria	k__norank_d__Bacteria	p__Bacteroidota	c__Bacteroidia	o__Bacteroidales	f__Tannerellaceae	g__Macellibacteroides	s__uncultured_bacterium_g__Macellibacteroides	OTU806	3	0	0	0	0	18	0	1	0	0	22
d__Bacteria	k__norank_d__Bacteria	p__Actinobacteriota	c__Actinobacteria	o__Propionibacteriales	f__Nocardioidaceae	g__Nocardioides	s__unclassified_g__Nocardioides	OTU484	1	0	0	0	0	0	0	0	1	0	2
d__Bacteria	k__norank_d__Bacteria	p__Proteobacteria	c__Gammaproteobacteria	o__SZB30	f__norank_o__SZB30	g__norank_f__norank_o__SZB30	s__uncultured_bacterium_g__norank_f__norank_o__SZB30	OTU64	2	12	12	1	0	1	4	4	11	0	47
d__Bacteria	k__norank_d__Bacteria	p__Nitrospinota	c__P9X2b3D02	o__norank_c__P9X2b3D02	f__norank_o__norank_c__P9X2b3D02	g__norank_f__norank_o__norank_c__P9X2b3D02	s__unclassified_g__norank_f__norank_o__norank_c__P9X2b3D02	OTU140	0	2	0	0	0	0	1	0	0	0	3
d__Bacteria	k__norank_d__Bacteria	p__Actinobacteriota	c__Acidimicrobiia	o__Microtrichales	f__Ilumatobacteraceae	g__CL500-29_marine_group	s__metagenome_g__CL500-29_marine_group	OTU15	1	1	0	0	0	0	0	0	0	0	2
d__Bacteria	k__norank_d__Bacteria	p__Proteobacteria	c__Alphaproteobacteria	o__Rhodobacterales	f__Rhodobacteraceae	g__Rhodobacter	s__Rhodobacter_blasticus	OTU240	7	8	9	3	2	3	3	3	7	4	49
d__Bacteria	k__norank_d__Bacteria	p__Actinobacteriota	c__Actinobacteria	o__Micrococcales	f__Microbacteriaceae	g__Candidatus_Aquiluna	s__uncultured_bacterium_g__Candidatus_Aquiluna	OTU25	2	0	1	2	0	0	0	1	0	0	6
d__Bacteria	k__norank_d__Bacteria	p__Actinobacteriota	c__Actinobacteria	o__Propionibacteriales	f__Propionibacteriaceae	g__unclassified_f__Propionibacteriaceae	s__unclassified_f__Propionibacteriaceae	OTU921	3	18	0	3	0	1	2	8	2	4	41
d__Bacteria	k__norank_d__Bacteria	p__Bacteroidota	c__Bacteroidia	o__Chitinophagales	f__Saprospiraceae	g__norank_f__Saprospiraceae	s__unclassified_g__norank_f__Saprospiraceae	OTU796	1	0	0	0	0	0	0	1	0	2	4
d__Bacteria	k__norank_d__Bacteria	p__Patescibacteria	c__CPR2	o__norank_c__CPR2	f__norank_o__norank_c__CPR2	g__norank_f__norank_o__norank_c__CPR2	s__uncultured_Clostridium_sp._g__norank_f__norank_o__norank	OTU260	0	0	2	0	0	0	0	1	1	0	4
d__Bacteria	k__norank_d__Bacteria	p__Bacteroidota	c__Bacteroidia	o__Flavobacteriales	f__Weeksellaceae	g__unclassified_f__Weeksellaceae	s__unclassified_f__Weeksellaceae	OTU504	0	0	0	0	0	0	2	0	0	1	3
d__Bacteria	k__norank_d__Bacteria	p__unclassified_k__norank_d__Bacteria	c__unclassified_k__norank_d__Bacteria	o__unclassified_k__norank_d__Bacteria	f__unclassified_k__norank_d__Bacteria	g__unclassified_k__norank_d__Bacteria	s__unclassified_k__norank_d__Bacteria	OTU991	0	0	0	0	0	0	0	0	2	0	2
d__Bacteria	k__norank_d__Bacteria	p__Actinobacteriota	c__Acidimicrobiia	o__Microtrichales	f__Ilumatobacteraceae	g__CL500-29_marine_group	s__uncultured_bacterium_g__CL500-29_marine_group	OTU535	3	2	3	1	1	1	1	1	2	1	16
d__Bacteria	k__norank_d__Bacteria	p__Bacteroidota	c__Bacteroidia	o__Chitinophagales	f__Saprospiraceae	g__norank_f__Saprospiraceae	s__unclassified_g__norank_f__Saprospiraceae	OTU1107	0	0	0	0	0	0	0	0	0	5	5
d__Bacteria	k__norank_d__Bacteria	p__Cyanobacteria	c__Cyanobacteriia	o__Cyanobacteriales	f__Phormidiaceae	g__Planktothrix_NIVA-CYA_15	s__Planktothrix_agardhii	OTU818	3	5	1	1	0	2	1	7	0	1	21
d__Bacteria	k__norank_d__Bacteria	p__Cyanobacteria	c__Cyanobacteriia	o__Chloroplast	f__norank_o__Chloroplast	g__norank_f__norank_o__Chloroplast	s__unclassified_g__norank_f__norank_o__Chloroplast	OTU724	0	2	0	0	0	0	1	0	0	0	3
d__Bacteria	k__norank_d__Bacteria	p__Bacteroidota	c__Bacteroidia	o__Chitinophagales	f__Saprospiraceae	g__norank_f__Saprospiraceae	s__unclassified_g__norank_f__Saprospiraceae	OTU799	0	0	4	0	1	0	0	1	0	3	9
d__Bacteria	k__norank_d__Bacteria	p__Proteobacteria	c__Gammaproteobacteria	o__Burkholderiales	f__Comamonadaceae	g__Delftia	s__Delftia_tsuruhatensis	OTU677	0	0	1	0	0	0	0	0	0	0	1
d__Bacteria	k__norank_d__Bacteria	p__Firmicutes	c__Bacilli	o__Entomoplasmatales	f__Entomoplasmatales_Incertae_Sedis	g__Candidatus_Hepatoplasma	s__uncultured_Entomoplasmatales_bacterium_g__Candidatus_Hepatoplasma	OTU180	0	0	0	0	2	0	1	0	2	6	11
d__Bacteria	k__norank_d__Bacteria	p__Nitrospinota	c__P9X2b3D02	o__norank_c__P9X2b3D02	f__norank_o__norank_c__P9X2b3D02	g__norank_f__norank_o__norank_c__P9X2b3D02	s__uncultured_prokaryote_g__norank_f__norank_o__norank_c__P9X2b3D02	OTU254	11	68	22	15	2	9	9	2	2	0	140
d__Bacteria	k__norank_d__Bacteria	p__Firmicutes	c__Clostridia	o__Peptostreptococcales-Tissierellales	f__Peptostreptococcaceae	g__Acetoanaerobium	s__uncultured_bacterium_g__Acetoanaerobium	OTU618	0	2	0	0	0	3	0	0	0	0	5
d__Bacteria	k__norank_d__Bacteria	p__Patescibacteria	c__Saccharimonadia	o__Saccharimonadales	f__norank_o__Saccharimonadales	g__norank_f__norank_o__Saccharimonadales	s__uncultured_bacterium_SBR2060	OTU267	0	1	1	0	0	0	0	0	0	0	2
d__Bacteria	k__norank_d__Bacteria	p__Chloroflexi	c__Anaerolineae	o__1-20	f__norank_o__1-20	g__norank_f__norank_o__1-20	s__unclassified_g__norank_f__norank_o__1-20	OTU878	2	4	0	4	0	1	3	0	0	1	15
d__Bacteria	k__norank_d__Bacteria	p__Actinobacteriota	c__Actinobacteria	o__Corynebacteriales	f__Mycobacteriaceae	g__Mycobacterium	s__uncultured_bacterium_g__Mycobacterium	OTU19	6	21	4	9	2	1	6	4	8	6	67
d__Bacteria	k__norank_d__Bacteria	p__Desulfobacterota	c__Desulfobacteria	o__Desulfobacterales	f__Desulfosarcinaceae	g__Sva0081_sediment_group	s__uncultured_prokaryote_g__Sva0081_sediment_group	OTU33	1	3	0	0	0	1	0	1	0	0	6
d__Bacteria	k__norank_d__Bacteria	p__WPS-2	c__norank_p__WPS-2	o__norank_c__norank_p__WPS-2	f__norank_o__norank_c__norank_p__WPS-2	g__norank_f__norank_o__norank_c__norank_p__WPS-2	s__hydrothermal_vent_metagenome_g__norank_f__norank_o__norank_c__norank_p__WPS-2	OTU1118	0	0	0	0	1	0	0	0	0	1	2
d__Bacteria	k__norank_d__Bacteria	p__Chloroflexi	c__Anaerolineae	o__Caldilineales	f__Caldilineaceae	g__norank_f__Caldilineaceae	s__unclassified_g__norank_f__Caldilineaceae	OTU745	0	1	2	0	0	0	2	0	0	0	5
d__Bacteria	k__norank_d__Bacteria	p__Chloroflexi	c__Chloroflexia	o__Chloroflexales	f__Chloroflexaceae	g__unclassified_f__Chloroflexaceae	s__unclassified_f__Chloroflexaceae	OTU976	0	0	1	0	0	0	0	0	1	0	2
d__Bacteria	k__norank_d__Bacteria	p__Desulfobacterota	c__Desulfobacteria	o__Desulfobacterales	f__Desulfococcaceae	g__norank_f__Desulfococcaceae	s__uncultured_Desulfatibacillum_sp.	OTU154	0	2	0	0	0	0	1	0	0	0	3
d__Bacteria	k__norank_d__Bacteria	p__Patescibacteria	c__ABY1	o__unclassified_c__ABY1	f__unclassified_c__ABY1	g__unclassified_c__ABY1	s__unclassified_c__ABY1	OTU272	4	2	2	1	0	0	1	1	6	0	17
d__Bacteria	k__norank_d__Bacteria	p__Actinobacteriota	c__Acidimicrobiia	o__Actinomarinales	f__norank_o__Actinomarinales	g__norank_f__norank_o__Actinomarinales	s__uncultured_actinobacterium_g__norank_f__norank_o__Actinomarinales	OTU575	1	2	0	1	2	0	10	0	1	1	18
d__Bacteria	k__norank_d__Bacteria	p__Firmicutes	c__Clostridia	o__Clostridiales	f__Clostridiaceae	g__Clostridium_sensu_stricto_1	s__uncultured_Clostridium_sp._g__Clostridium_sensu_stricto_1	OTU161	0	0	0	1	0	0	1	0	0	0	2
d__Bacteria	k__norank_d__Bacteria	p__Chloroflexi	c__Anaerolineae	o__unclassified_c__Anaerolineae	f__unclassified_c__Anaerolineae	g__unclassified_c__Anaerolineae	s__unclassified_c__Anaerolineae	OTU551	0	1	0	1	0	0	0	0	0	0	2
d__Bacteria	k__norank_d__Bacteria	p__WS2	c__norank_p__WS2	o__norank_c__norank_p__WS2	f__norank_o__norank_c__norank_p__WS2	g__norank_f__norank_o__norank_c__norank_p__WS2	s__unclassified_g__norank_f__norank_o__norank_c__norank_p__WS2	OTU275	1	4	4	1	0	0	0	1	1	0	12
d__Bacteria	k__norank_d__Bacteria	p__Cyanobacteria	c__Cyanobacteriia	o__Chloroplast	f__norank_o__Chloroplast	g__norank_f__norank_o__Chloroplast	s__Parachlorella_kessleri	OTU622	0	0	0	0	1	1	0	0	0	0	2
d__Bacteria	k__norank_d__Bacteria	p__Firmicutes	c__Bacilli	o__unclassified_c__Bacilli	f__unclassified_c__Bacilli	g__unclassified_c__Bacilli	s__unclassified_c__Bacilli	OTU1002	0	0	1	0	0	0	0	0	4	0	5
d__Bacteria	k__norank_d__Bacteria	p__Acidobacteriota	c__Subgroup_25	o__norank_c__Subgroup_25	f__norank_o__norank_c__Subgroup_25	g__norank_f__norank_o__norank_c__Subgroup_25	s__uncultured_Acidobacteria_bacterium_g__norank_f__norank_o__norank_c__Subgroup_25	OTU257	1	3	1	0	0	0	0	0	0	0	5
d__Bacteria	k__norank_d__Bacteria	p__Nitrospirota	c__Nitrospiria	o__Nitrospirales	f__Nitrospiraceae	g__Nitrospira	s__uncultured_organism_g__Nitrospira	OTU296	0	0	0	0	2	0	0	3	0	2	7
d__Bacteria	k__norank_d__Bacteria	p__Bacteroidota	c__Kryptonia	o__Kryptoniales	f__BSV26	g__norank_f__BSV26	s__uncultured_bacterium_g__norank_f__BSV26	OTU38	2	0	1	0	0	0	0	0	0	0	3
d__Bacteria	k__norank_d__Bacteria	p__Desulfobacterota	c__Syntrophia	o__Syntrophales	f__Syntrophaceae	g__Syntrophus	s__unclassified_g__Syntrophus	OTU283	0	1	2	1	0	0	1	2	1	0	8
d__Bacteria	k__norank_d__Bacteria	p__Chloroflexi	c__KD4-96	o__norank_c__KD4-96	f__norank_o__norank_c__KD4-96	g__norank_f__norank_o__norank_c__KD4-96	s__metagenome_g__norank_f__norank_o__norank_c__KD4-96	OTU393	4	4	1	2	0	1	1	1	1	0	15
d__Bacteria	k__norank_d__Bacteria	p__Verrucomicrobiota	c__Kiritimatiellae	o__WCHB1-41	f__norank_o__WCHB1-41	g__norank_f__norank_o__WCHB1-41	s__unclassified_g__norank_f__norank_o__WCHB1-41	OTU825	0	0	0	0	0	0	0	3	0	0	3
d__Bacteria	k__norank_d__Bacteria	p__Chloroflexi	c__Anaerolineae	o__Anaerolineales	f__Anaerolineaceae	g__norank_f__Anaerolineaceae	s__unclassified_g__norank_f__Anaerolineaceae	OTU1128	7	20	5	12	0	1	7	6	3	1	62
d__Bacteria	k__norank_d__Bacteria	p__Bacteroidota	c__Kapabacteria	o__Kapabacteriales	f__norank_o__Kapabacteriales	g__norank_f__norank_o__Kapabacteriales	s__uncultured_bacterium_g__norank_f__norank_o__Kapabacteriales	OTU1070	0	0	0	0	1	0	0	0	0	1	2
d__Bacteria	k__norank_d__Bacteria	p__Firmicutes	c__Bacilli	o__Erysipelotrichales	f__Erysipelotrichaceae	g__Turicibacter	s__uncultured_bacterium_g__Turicibacter	OTU82	2	7	0	3	1	0	0	1	8	0	22
d__Bacteria	k__norank_d__Bacteria	p__Bacteroidota	c__Bacteroidia	o__Bacteroidales	f__Prolixibacteraceae	g__Mangrovibacterium	s__unclassified_g__Mangrovibacterium	OTU330	0	0	0	0	0	0	0	0	0	1	1
d__Bacteria	k__norank_d__Bacteria	p__Desulfobacterota	c__Desulfobulbia	o__Desulfobulbales	f__Desulfocapsaceae	g__norank_f__Desulfocapsaceae	s__unclassified_g__norank_f__Desulfocapsaceae	OTU150	5	7	1	0	1	2	1	0	0	2	19
d__Bacteria	k__norank_d__Bacteria	p__Patescibacteria	c__CPR2	o__norank_c__CPR2	f__norank_o__norank_c__CPR2	g__norank_f__norank_o__norank_c__CPR2	s__uncultured_bacterium_g__norank_f__norank_o__norank_c__CPR2	OTU235	1	0	1	1	0	0	0	0	0	0	3
d__Bacteria	k__norank_d__Bacteria	p__Planctomycetota	c__Planctomycetes	o__Gemmatales	f__Gemmataceae	g__norank_f__Gemmataceae	s__bacterium_enrichment_culture_clone_B1452011	OTU516	0	3	0	1	0	0	0	0	0	0	4
d__Bacteria	k__norank_d__Bacteria	p__Firmicutes	c__Clostridia	o__norank_c__Clostridia	f__Hungateiclostridiaceae	g__unclassified_f__Hungateiclostridiaceae	s__unclassified_f__Hungateiclostridiaceae	OTU92	0	2	0	0	0	0	0	0	0	0	2
d__Bacteria	k__norank_d__Bacteria	p__Proteobacteria	c__Gammaproteobacteria	o__Xanthomonadales	f__Xanthomonadaceae	g__Luteimonas	s__uncultured_Lysobacter_sp._g__Luteimonas	OTU944	1	3	1	0	0	0	0	0	0	2	7
d__Bacteria	k__norank_d__Bacteria	p__Bacteroidota	c__Bacteroidia	o__Sphingobacteriales	f__AKYH767	g__norank_f__AKYH767	s__uncultured_bacterium_g__norank_f__AKYH767	OTU621	0	0	0	0	0	2	0	0	0	1	3
d__Bacteria	k__norank_d__Bacteria	p__Firmicutes	c__Bacilli	o__Bacillales	f__Bacillaceae	g__Bacillus	s__Bacillus_anthracis_g__Bacillus	OTU1039	0	0	0	0	0	0	0	1	0	0	1
d__Bacteria	k__norank_d__Bacteria	p__Chloroflexi	c__Anaerolineae	o__Anaerolineales	f__Anaerolineaceae	g__norank_f__Anaerolineaceae	s__unclassified_g__norank_f__Anaerolineaceae	OTU778	1	7	0	0	0	1	2	2	1	2	16
d__Bacteria	k__norank_d__Bacteria	p__Chloroflexi	c__Anaerolineae	o__Anaerolineales	f__Anaerolineaceae	g__norank_f__Anaerolineaceae	s__unclassified_g__norank_f__Anaerolineaceae	OTU779	2	24	3	2	0	4	5	2	1	1	44
d__Bacteria	k__norank_d__Bacteria	p__Proteobacteria	c__Alphaproteobacteria	o__Caulobacterales	f__Caulobacteraceae	g__norank_f__Caulobacteraceae	s__uncultured_bacterium_g__norank_f__Caulobacteraceae	OTU869	0	4	1	0	0	2	4	5	2	2	20
d__Bacteria	k__norank_d__Bacteria	p__Actinobacteriota	c__Acidimicrobiia	o__IMCC26256	f__norank_o__IMCC26256	g__norank_f__norank_o__IMCC26256	s__uncultured_Acidimicrobiia_bacterium_g__norank_f__norank	OTU599	1	4	3	1	0	0	0	1	1	0	11
d__Bacteria	k__norank_d__Bacteria	p__Proteobacteria	c__Alphaproteobacteria	o__Rhizobiales	f__Xanthobacteraceae	g__Pseudorhodoplanes	s__uncultured_bacterium_g__Pseudorhodoplanes	OTU22	1	0	0	0	0	0	0	0	1	0	2
d__Bacteria	k__norank_d__Bacteria	p__Chloroflexi	c__Anaerolineae	o__Caldilineales	f__Caldilineaceae	g__norank_f__Caldilineaceae	s__metagenome_g__norank_f__Caldilineaceae	OTU735	0	8	1	3	1	1	2	1	3	0	20
d__Bacteria	k__norank_d__Bacteria	p__Desulfobacterota	c__Syntrophobacteria	o__Syntrophobacterales	f__Syntrophobacteraceae	g__Syntrophobacter	s__unclassified_g__Syntrophobacter	OTU764	1	1	0	0	0	0	2	0	0	0	4
d__Bacteria	k__norank_d__Bacteria	p__Proteobacteria	c__Gammaproteobacteria	o__Coxiellales	f__Coxiellaceae	g__Coxiella	s__unclassified_g__Coxiella	OTU455	0	0	0	2	0	0	0	0	0	0	2
d__Bacteria	k__norank_d__Bacteria	p__Chloroflexi	c__Anaerolineae	o__SBR1031	f__A4b	g__norank_f__A4b	s__uncultured_bacterium_g__norank_f__A4b	OTU800	0	0	0	0	1	0	0	1	0	0	2
d__Bacteria	k__norank_d__Bacteria	p__Chloroflexi	c__Anaerolineae	o__SBR1031	f__A4b	g__norank_f__A4b	s__uncultured_bacterium_g__norank_f__A4b	OTU801	0	0	0	0	1	0	0	4	0	2	7
d__Bacteria	k__norank_d__Bacteria	p__Proteobacteria	c__Gammaproteobacteria	o__Aeromonadales	f__Aeromonadaceae	g__Aeromonas	s__Aeromonas_caviae	OTU960	8	0	6	1	14	15	1	4	15	57	121
d__Bacteria	k__norank_d__Bacteria	p__Actinobacteriota	c__Actinobacteria	o__unclassified_c__Actinobacteria	f__unclassified_c__Actinobacteria	g__unclassified_c__Actinobacteria	s__unclassified_c__Actinobacteria	OTU545	0	1	1	0	0	0	0	0	0	1	3
d__Bacteria	k__norank_d__Bacteria	p__Acidobacteriota	c__Vicinamibacteria	o__Vicinamibacterales	f__Vicinamibacteraceae	g__norank_f__Vicinamibacteraceae	s__unclassified_g__norank_f__Vicinamibacteraceae	OTU291	1	0	2	0	0	0	0	2	0	2	7
d__Bacteria	k__norank_d__Bacteria	p__Firmicutes	c__Clostridia	o__Christensenellales	f__Christensenellaceae	g__Christensenellaceae_R-7_group	s__uncultured_bacterium_g__Christensenellaceae_R-7_group	OTU242	2	0	1	0	0	0	0	0	0	0	3
d__Bacteria	k__norank_d__Bacteria	p__Patescibacteria	c__Saccharimonadia	o__Saccharimonadales	f__norank_o__Saccharimonadales	g__norank_f__norank_o__Saccharimonadales	s__uncultured_Candidatus_Saccharibacteria_bacterium_g__norank_f__norank	OTU1134	0	0	2	0	1	0	0	0	0	3	6
d__Bacteria	k__norank_d__Bacteria	p__Chloroflexi	c__Anaerolineae	o__Anaerolineales	f__Anaerolineaceae	g__unclassified_f__Anaerolineaceae	s__unclassified_f__Anaerolineaceae	OTU662	3	11	0	7	0	2	5	3	0	0	31
d__Bacteria	k__norank_d__Bacteria	p__Proteobacteria	c__Alphaproteobacteria	o__Rhizobiales	f__Hyphomicrobiaceae	g__Pedomicrobium	s__uncultured_bacterium_g__Pedomicrobium	OTU325	1	2	4	0	0	0	0	2	1	2	12
d__Bacteria	k__norank_d__Bacteria	p__Bacteroidota	c__Kapabacteria	o__Kapabacteriales	f__norank_o__Kapabacteriales	g__norank_f__norank_o__Kapabacteriales	s__uncultured_bacterium_g__norank_f__norank_o__Kapabacteriales	OTU197	0	0	0	0	0	0	0	1	0	0	1
d__Bacteria	k__norank_d__Bacteria	p__Cyanobacteria	c__Cyanobacteriia	o__Chloroplast	f__norank_o__Chloroplast	g__norank_f__norank_o__Chloroplast	s__Mychonastes_jurisii	OTU446	0	1	0	1	0	0	0	0	0	0	2
d__Bacteria	k__norank_d__Bacteria	p__Desulfobacterota	c__Desulfobulbia	o__Desulfobulbales	f__Desulfobulbaceae	g__norank_f__Desulfobulbaceae	s__uncultured_bacterium_g__norank_f__Desulfobulbaceae	OTU447	1	3	4	7	0	0	5	0	7	0	27
d__Bacteria	k__norank_d__Bacteria	p__Nitrospirota	c__Nitrospiria	o__Nitrospirales	f__Nitrospiraceae	g__Nitrospira	s__unclassified_g__Nitrospira	OTU318	0	0	0	0	1	0	0	0	0	0	1
d__Bacteria	k__norank_d__Bacteria	p__Bacteroidota	c__Bacteroidia	o__Chitinophagales	f__Saprospiraceae	g__norank_f__Saprospiraceae	s__unclassified_g__norank_f__Saprospiraceae	OTU804	0	0	0	0	0	1	0	1	0	0	2
d__Bacteria	k__norank_d__Bacteria	p__Proteobacteria	c__Alphaproteobacteria	o__Rhizobiales	f__Xanthobacteraceae	g__Bradyrhizobium	s__unclassified_g__Bradyrhizobium	OTU322	0	0	1	0	0	0	0	0	0	0	1
d__Bacteria	k__norank_d__Bacteria	p__Actinobacteriota	c__Actinobacteria	o__Kineosporiales	f__Kineosporiaceae	g__Kineosporia	s__uncultured_bacterium_g__Kineosporia	OTU701	0	0	0	0	0	1	0	0	0	0	1
d__Bacteria	k__norank_d__Bacteria	p__Actinobacteriota	c__Thermoleophilia	o__Gaiellales	f__norank_o__Gaiellales	g__norank_f__norank_o__Gaiellales	s__metagenome_g__norank_f__norank_o__Gaiellales	OTU522	0	1	0	2	0	0	0	0	0	0	3
d__Bacteria	k__norank_d__Bacteria	p__Actinobacteriota	c__Actinobacteria	o__Micrococcales	f__Microbacteriaceae	g__Agromyces	s__unclassified_g__Agromyces	OTU1157	1	0	0	0	0	0	0	1	0	0	2
d__Bacteria	k__norank_d__Bacteria	p__Cyanobacteria	c__Cyanobacteriia	o__Chloroplast	f__norank_o__Chloroplast	g__norank_f__norank_o__Chloroplast	s__unclassified_g__norank_f__norank_o__Chloroplast	OTU406	1	0	0	0	0	0	0	0	0	0	1
d__Bacteria	k__norank_d__Bacteria	p__Cyanobacteria	c__Cyanobacteriia	o__Chloroplast	f__norank_o__Chloroplast	g__norank_f__norank_o__Chloroplast	s__unclassified_g__norank_f__norank_o__Chloroplast	OTU402	3	4	2	0	0	2	5	1	1	0	18
d__Bacteria	k__norank_d__Bacteria	p__Bacteroidota	c__Bacteroidia	o__Flavobacteriales	f__Flavobacteriaceae	g__Flavobacterium	s__uncultured_Bacteroidetes_bacterium_g__Flavobacterium	OTU830	0	0	0	0	0	5	0	1	0	0	6
d__Bacteria	k__norank_d__Bacteria	p__Desulfobacterota	c__Syntrophobacteria	o__Syntrophobacterales	f__norank_o__Syntrophobacterales	g__norank_f__norank_o__Syntrophobacterales	s__uncultured_bacterium_g__norank_f__norank_o__Syntrophobacterales	OTU135	6	16	2	4	1	0	6	0	0	0	35
d__Bacteria	k__norank_d__Bacteria	p__Cyanobacteria	c__Cyanobacteriia	o__Cyanobacteriales	f__Microcystaceae	g__Synechocystis_PCC-6803	s__uncultured_bacterium_g__Synechocystis_PCC-6803	OTU157	0	3	0	0	0	0	0	0	0	0	3
d__Bacteria	k__norank_d__Bacteria	p__Bacteroidota	c__Bacteroidia	o__Sphingobacteriales	f__Lentimicrobiaceae	g__norank_f__Lentimicrobiaceae	s__uncultured_Sphingobacteriales_bacterium_g__norank_f__Lentimicrobiaceae	OTU619	3	0	0	0	0	3	0	0	0	0	6
d__Bacteria	k__norank_d__Bacteria	p__Proteobacteria	c__Gammaproteobacteria	o__Cellvibrionales	f__Halieaceae	g__OM60NOR5_clade	s__uncultured_bacterium_g__OM60NOR5_clade	OTU213	2	0	1	0	0	0	0	1	3	1	8
d__Bacteria	k__norank_d__Bacteria	p__Proteobacteria	c__Gammaproteobacteria	o__norank_c__Gammaproteobacteria	f__norank_o__norank_c__Gammaproteobacteria	g__norank_f__norank_o__norank_c__Gammaproteobacteria	s__uncultured_organism_g__norank_f__norank_o__norank_c__Gammaproteobacteria	OTU41	1	0	0	0	0	0	0	0	0	0	1
d__Bacteria	k__norank_d__Bacteria	p__Firmicutes	c__Clostridia	o__norank_c__Clostridia	f__Hungateiclostridiaceae	g__unclassified_f__Hungateiclostridiaceae	s__unclassified_f__Hungateiclostridiaceae	OTU1152	0	2	0	1	0	0	1	1	0	1	6
d__Bacteria	k__norank_d__Bacteria	p__Actinobacteriota	c__Actinobacteria	o__Frankiales	f__Sporichthyaceae	g__hgcI_clade	s__uncultured_bacterium_g__hgcI_clade	OTU956	0	0	0	0	0	1	0	0	0	0	1
d__Bacteria	k__norank_d__Bacteria	p__unclassified_k__norank_d__Bacteria	c__unclassified_k__norank_d__Bacteria	o__unclassified_k__norank_d__Bacteria	f__unclassified_k__norank_d__Bacteria	g__unclassified_k__norank_d__Bacteria	s__unclassified_k__norank_d__Bacteria	OTU1022	0	0	1	0	0	0	0	0	0	0	1
d__Bacteria	k__norank_d__Bacteria	p__Planctomycetota	c__Planctomycetes	o__Gemmatales	f__Gemmataceae	g__norank_f__Gemmataceae	s__unclassified_g__norank_f__Gemmataceae	OTU1062	0	3	0	0	0	0	0	0	0	0	3
d__Bacteria	k__norank_d__Bacteria	p__Patescibacteria	c__WWE3	o__norank_c__WWE3	f__norank_o__norank_c__WWE3	g__norank_f__norank_o__norank_c__WWE3	s__unclassified_g__norank_f__norank_o__norank_c__WWE3	OTU1010	0	2	0	0	0	1	1	0	1	0	5
d__Bacteria	k__norank_d__Bacteria	p__Proteobacteria	c__Gammaproteobacteria	o__Burkholderiales	f__Rhodocyclaceae	g__Dechloromonas	s__uncultured_bacterium_g__Dechloromonas	OTU266	4	0	1	0	1	0	0	0	0	1	7
d__Bacteria	k__norank_d__Bacteria	p__Proteobacteria	c__Gammaproteobacteria	o__Burkholderiales	f__SC-I-84	g__norank_f__SC-I-84	s__uncultured_prokaryote_g__norank_f__SC-I-84	OTU740	5	12	12	0	3	2	2	5	2	2	45
d__Bacteria	k__norank_d__Bacteria	p__Patescibacteria	c__CPR2	o__norank_c__CPR2	f__norank_o__norank_c__CPR2	g__norank_f__norank_o__norank_c__CPR2	s__uncultured_bacterium_g__norank_f__norank_o__norank_c__CPR2	OTU904	0	3	1	4	0	1	3	1	1	1	15
d__Bacteria	k__norank_d__Bacteria	p__Patescibacteria	c__CPR2	o__norank_c__CPR2	f__norank_o__norank_c__CPR2	g__norank_f__norank_o__norank_c__CPR2	s__uncultured_bacterium_g__norank_f__norank_o__norank_c__CPR2	OTU903	3	6	7	7	1	0	4	0	15	2	45
d__Bacteria	k__norank_d__Bacteria	p__Firmicutes	c__Bacilli	o__Alicyclobacillales	f__Alicyclobacillaceae	g__Tumebacillus	s__uncultured_bacterium_g__Tumebacillus	OTU1153	0	0	0	0	0	0	0	0	1	0	1
d__Bacteria	k__norank_d__Bacteria	p__unclassified_k__norank_d__Bacteria	c__unclassified_k__norank_d__Bacteria	o__unclassified_k__norank_d__Bacteria	f__unclassified_k__norank_d__Bacteria	g__unclassified_k__norank_d__Bacteria	s__unclassified_k__norank_d__Bacteria	OTU499	2	0	0	0	2	0	0	0	0	0	4
d__Bacteria	k__norank_d__Bacteria	p__Acidobacteriota	c__Vicinamibacteria	o__Vicinamibacterales	f__Vicinamibacteraceae	g__norank_f__Vicinamibacteraceae	s__uncultured_Acidobacteria_bacterium_g__norank_f__Vicinamibacteraceae	OTU388	0	1	0	0	0	0	0	0	0	0	1
d__Bacteria	k__norank_d__Bacteria	p__Verrucomicrobiota	c__Verrucomicrobiae	o__Chthoniobacterales	f__Terrimicrobiaceae	g__Terrimicrobium	s__uncultured_bacterium_g__Terrimicrobium	OTU650	0	0	2	1	0	0	0	1	0	0	4
d__Bacteria	k__norank_d__Bacteria	p__Firmicutes	c__Clostridia	o__Lachnospirales	f__Lachnospiraceae	g__Tyzzerella	s__unclassified_g__Tyzzerella	OTU753	392	1455	64	1214	752	59	2491	3059	34	1079	10599
d__Bacteria	k__norank_d__Bacteria	p__Proteobacteria	c__Gammaproteobacteria	o__Burkholderiales	f__Nitrosomonadaceae	g__Ellin6067	s__uncultured_soil_bacterium_g__Ellin6067	OTU381	1	0	1	0	0	0	0	0	0	0	2
d__Bacteria	k__norank_d__Bacteria	p__Proteobacteria	c__Gammaproteobacteria	o__Alteromonadales	f__Shewanellaceae	g__Shewanella	s__Shewanella_marisflavi	OTU636	22	0	0	0	39	12	0	72	0	0	145
d__Bacteria	k__norank_d__Bacteria	p__unclassified_k__norank_d__Bacteria	c__unclassified_k__norank_d__Bacteria	o__unclassified_k__norank_d__Bacteria	f__unclassified_k__norank_d__Bacteria	g__unclassified_k__norank_d__Bacteria	s__unclassified_k__norank_d__Bacteria	OTU658	0	1	0	0	0	0	2	2	3	0	8
d__Bacteria	k__norank_d__Bacteria	p__Acidobacteriota	c__Vicinamibacteria	o__Vicinamibacterales	f__Vicinamibacteraceae	g__norank_f__Vicinamibacteraceae	s__unclassified_g__norank_f__Vicinamibacteraceae	OTU24	13	41	25	5	0	3	4	4	7	2	104
d__Bacteria	k__norank_d__Bacteria	p__Armatimonadota	c__norank_p__Armatimonadota	o__norank_c__norank_p__Armatimonadota	f__norank_o__norank_c__norank_p__Armatimonadota	g__norank_f__norank_o__norank_c__norank_p__Armatimonadota	s__uncultured_bacterium_g__norank_f__norank_o__norank_c__norank_p__Armatimonadota	OTU103	0	2	1	2	0	0	0	0	1	0	6
d__Bacteria	k__norank_d__Bacteria	p__Proteobacteria	c__Gammaproteobacteria	o__Burkholderiales	f__Burkholderiaceae	g__Limnobacter	s__uncultured_bacterium_g__Limnobacter	OTU234	0	0	1	0	0	0	0	0	0	0	1
d__Bacteria	k__norank_d__Bacteria	p__Actinobacteriota	c__WCHB1-81	o__norank_c__WCHB1-81	f__norank_o__norank_c__WCHB1-81	g__norank_f__norank_o__norank_c__WCHB1-81	s__uncultured_bacterium_g__norank_f__norank_o__norank_c__WCHB1-81	OTU134	0	4	0	0	0	0	1	0	0	0	5
d__Bacteria	k__norank_d__Bacteria	p__Chloroflexi	c__Anaerolineae	o__SBR1031	f__norank_o__SBR1031	g__norank_f__norank_o__SBR1031	s__unclassified_g__norank_f__norank_o__SBR1031	OTU831	1	13	2	0	0	0	4	2	2	0	24
d__Bacteria	k__norank_d__Bacteria	p__Chloroflexi	c__Anaerolineae	o__Anaerolineales	f__Anaerolineaceae	g__norank_f__Anaerolineaceae	s__unclassified_g__norank_f__Anaerolineaceae	OTU541	3	16	1	2	0	0	0	1	0	0	23
d__Bacteria	k__norank_d__Bacteria	p__Actinobacteriota	c__WCHB1-81	o__norank_c__WCHB1-81	f__norank_o__norank_c__WCHB1-81	g__norank_f__norank_o__norank_c__WCHB1-81	s__uncultured_bacterium_g__norank_f__norank_o__norank_c__WCHB1-81	OTU133	5	20	3	7	0	2	6	1	1	1	46
d__Bacteria	k__norank_d__Bacteria	p__Actinobacteriota	c__Thermoleophilia	o__Gaiellales	f__norank_o__Gaiellales	g__norank_f__norank_o__Gaiellales	s__unclassified_g__norank_f__norank_o__Gaiellales	OTU404	0	0	0	0	0	0	0	0	0	3	3
d__Bacteria	k__norank_d__Bacteria	p__Chloroflexi	c__KD4-96	o__norank_c__KD4-96	f__norank_o__norank_c__KD4-96	g__norank_f__norank_o__norank_c__KD4-96	s__uncultured_bacterium_g__norank_f__norank_o__norank_c__KD4-96	OTU1114	0	3	1	1	0	0	3	0	0	1	9
d__Bacteria	k__norank_d__Bacteria	p__Firmicutes	c__Bacilli	o__Erysipelotrichales	f__Erysipelotrichaceae	g__Dielma	s__uncultured_bacterium_g__Dielma	OTU258	2	14	5	3	0	1	6	3	1	0	35
d__Bacteria	k__norank_d__Bacteria	p__Chloroflexi	c__Anaerolineae	o__1-20	f__norank_o__1-20	g__norank_f__norank_o__1-20	s__uncultured_bacterium_g__norank_f__norank_o__1-20	OTU287	6	32	7	3	1	6	12	4	11	3	85
d__Bacteria	k__norank_d__Bacteria	p__Bacteroidota	c__Bacteroidia	o__Flavobacteriales	f__Flavobacteriaceae	g__Flavobacterium	s__unclassified_g__Flavobacterium	OTU28	1	0	0	0	0	4	0	0	0	0	5
d__Bacteria	k__norank_d__Bacteria	p__Proteobacteria	c__Alphaproteobacteria	o__Sphingomonadales	f__Sphingomonadaceae	g__Erythrobacter	s__unclassified_g__Erythrobacter	OTU18	1	0	0	0	0	0	1	2	0	0	4
d__Bacteria	k__norank_d__Bacteria	p__Actinobacteriota	c__Actinobacteria	o__Kineosporiales	f__Kineosporiaceae	g__unclassified_f__Kineosporiaceae	s__unclassified_f__Kineosporiaceae	OTU102	67	61	13	3	1	2	38	8	3	20	216
d__Bacteria	k__norank_d__Bacteria	p__Bacteroidota	c__Bacteroidia	o__Flavobacteriales	f__Flavobacteriaceae	g__Flavobacterium	s__Flavobacterium_columnare_g__Flavobacterium	OTU1	2	0	0	0	0	0	0	0	0	0	2
d__Bacteria	k__norank_d__Bacteria	p__Chloroflexi	c__Chloroflexia	o__Thermomicrobiales	f__JG30-KF-CM45	g__norank_f__JG30-KF-CM45	s__unclassified_g__norank_f__JG30-KF-CM45	OTU1106	0	0	0	0	1	0	1	0	0	4	6
d__Bacteria	k__norank_d__Bacteria	p__Firmicutes	c__Clostridia	o__Christensenellales	f__Christensenellaceae	g__Christensenellaceae_R-7_group	s__unclassified_g__Christensenellaceae_R-7_group	OTU237	10	0	1	0	1	2	0	0	1	1	16
d__Bacteria	k__norank_d__Bacteria	p__Bdellovibrionota	c__Bdellovibrionia	o__Bdellovibrionales	f__Bdellovibrionaceae	g__Bdellovibrio	s__uncultured_bacterium_g__Bdellovibrio	OTU280	0	0	1	0	0	0	0	0	1	0	2
d__Bacteria	k__norank_d__Bacteria	p__Firmicutes	c__Clostridia	o__Lachnospirales	f__Lachnospiraceae	g__Tyzzerella	s__uncultured_bacterium_g__Tyzzerella	OTU949	1	8	0	17	123	6	36	0	0	112	303
d__Bacteria	k__norank_d__Bacteria	p__Patescibacteria	c__Saccharimonadia	o__Saccharimonadales	f__norank_o__Saccharimonadales	g__norank_f__norank_o__Saccharimonadales	s__unclassified_g__norank_f__norank_o__Saccharimonadales	OTU531	0	1	0	0	0	0	0	1	1	0	3
d__Bacteria	k__norank_d__Bacteria	p__Firmicutes	c__Bacilli	o__Bacillales	f__Bacillaceae	g__Fictibacillus	s__Fictibacillus_arsenicus	OTU883	1	1	0	1	0	0	2	0	0	1	6
d__Bacteria	k__norank_d__Bacteria	p__unclassified_k__norank_d__Bacteria	c__unclassified_k__norank_d__Bacteria	o__unclassified_k__norank_d__Bacteria	f__unclassified_k__norank_d__Bacteria	g__unclassified_k__norank_d__Bacteria	s__unclassified_k__norank_d__Bacteria	OTU11	1	0	0	0	0	0	1	0	0	0	2
d__Bacteria	k__norank_d__Bacteria	p__Actinobacteriota	c__Actinobacteria	o__Propionibacteriales	f__Propionibacteriaceae	g__unclassified_f__Propionibacteriaceae	s__unclassified_f__Propionibacteriaceae	OTU534	0	3	0	0	0	0	0	0	0	0	3
d__Bacteria	k__norank_d__Bacteria	p__SAR324_cladeMarine_group_B	c__norank_p__SAR324_cladeMarine_group_B	o__norank_c__norank_p__SAR324_cladeMarine_group_B	f__norank_o__norank_c__norank_p__SAR324_cladeMarine_group_B	g__norank_f__norank_o__norank_c__norank_p__SAR324_cladeMarine_group_B	s__uncultured_delta_proteobacterium_g__norank_f__norank_o__norank_c__norank_p__SAR324_cladeMarine_group_B	OTU544	0	0	0	0	0	0	1	2	0	0	3
d__Bacteria	k__norank_d__Bacteria	p__Proteobacteria	c__Alphaproteobacteria	o__Rhodobacterales	f__Rhodobacteraceae	g__Albimonas	s__uncultured_bacterium_g__Albimonas	OTU539	210	14	5	1	2	0	2	1	3	29	267
d__Bacteria	k__norank_d__Bacteria	p__Proteobacteria	c__Gammaproteobacteria	o__Xanthomonadales	f__Xanthomonadaceae	g__Luteimonas	s__unclassified_g__Luteimonas	OTU20	1	0	0	0	0	0	0	0	0	0	1
d__Bacteria	k__norank_d__Bacteria	p__Desulfobacterota	c__Syntrophobacteria	o__Syntrophobacterales	f__Syntrophobacteraceae	g__Desulfovirga	s__uncultured_bacterium_g__Desulfovirga	OTU232	0	1	1	0	0	1	0	2	0	1	6
d__Bacteria	k__norank_d__Bacteria	p__Proteobacteria	c__Gammaproteobacteria	o__Oceanospirillales	f__Halomonadaceae	g__Halomonas	s__Candidatus_Halomonas_phosphatis	OTU166	2	0	0	0	0	0	0	0	0	0	2
d__Bacteria	k__norank_d__Bacteria	p__Verrucomicrobiota	c__Kiritimatiellae	o__113B434	f__norank_o__113B434	g__norank_f__norank_o__113B434	s__uncultured_bacterium_g__norank_f__norank_o__113B434	OTU13	2	7	0	1	0	0	2	0	1	0	13
d__Bacteria	k__norank_d__Bacteria	p__Bacteroidota	c__Bacteroidia	o__Flavobacteriales	f__Weeksellaceae	g__norank_f__Weeksellaceae	s__uncultured_bacterium_g__norank_f__Weeksellaceae	OTU511	2	1	4	1	0	0	3	4	0	3	18
d__Bacteria	k__norank_d__Bacteria	p__Patescibacteria	c__CPR2	o__norank_c__CPR2	f__norank_o__norank_c__CPR2	g__norank_f__norank_o__norank_c__CPR2	s__uncultured_bacterium_g__norank_f__norank_o__norank_c__CPR2	OTU309	1	2	3	0	0	2	2	1	1	0	12
d__Bacteria	k__norank_d__Bacteria	p__Cyanobacteria	c__Cyanobacteriia	o__Chloroplast	f__norank_o__Chloroplast	g__norank_f__norank_o__Chloroplast	s__unclassified_g__norank_f__norank_o__Chloroplast	OTU795	0	2	0	0	0	0	0	1	0	0	3
d__Bacteria	k__norank_d__Bacteria	p__unclassified_k__norank_d__Bacteria	c__unclassified_k__norank_d__Bacteria	o__unclassified_k__norank_d__Bacteria	f__unclassified_k__norank_d__Bacteria	g__unclassified_k__norank_d__Bacteria	s__unclassified_k__norank_d__Bacteria	OTU155	0	2	0	0	0	0	0	0	0	0	2
d__Bacteria	k__norank_d__Bacteria	p__Firmicutes	c__Clostridia	o__Lachnospirales	f__Lachnospiraceae	g__Cellulosilyticum	s__unclassified_g__Cellulosilyticum	OTU815	1	2	0	0	0	0	0	2	0	0	5
d__Bacteria	k__norank_d__Bacteria	p__Dependentiae	c__Babeliae	o__Babeliales	f__Vermiphilaceae	g__norank_f__Vermiphilaceae	s__unclassified_g__norank_f__Vermiphilaceae	OTU289	0	2	1	0	0	0	0	0	0	0	3
d__Bacteria	k__norank_d__Bacteria	p__Desulfobacterota	c__Desulfuromonadia	o__Geobacterales	f__Geobacteraceae	g__norank_f__Geobacteraceae	s__uncultured_bacterium_g__norank_f__Geobacteraceae	OTU638	0	0	0	0	0	2	0	1	0	0	3
d__Bacteria	k__norank_d__Bacteria	p__Fusobacteriota	c__Fusobacteriia	o__Fusobacteriales	f__Fusobacteriaceae	g__Cetobacterium	s__uncultured_bacterium_g__Cetobacterium	OTU820	3	3	5	1	0	1	2	2	7	0	24
d__Bacteria	k__norank_d__Bacteria	p__Proteobacteria	c__Alphaproteobacteria	o__Paracaedibacterales	f__Paracaedibacteraceae	g__Candidatus_Paracaedibacter	s__uncultured_bacterium_g__Candidatus_Paracaedibacter	OTU663	0	0	0	1	0	0	0	1	1	0	3
d__Bacteria	k__norank_d__Bacteria	p__Actinobacteriota	c__Actinobacteria	o__PeM15	f__norank_o__PeM15	g__norank_f__norank_o__PeM15	s__unclassified_g__norank_f__norank_o__PeM15	OTU21	17	37	3	7	2	1	9	11	16	1	104
d__Bacteria	k__norank_d__Bacteria	p__Desulfobacterota	c__Syntrophobacteria	o__Syntrophobacterales	f__Syntrophobacteraceae	g__Syntrophobacter	s__unclassified_g__Syntrophobacter	OTU503	0	2	0	0	0	1	0	0	1	0	4
d__Bacteria	k__norank_d__Bacteria	p__Firmicutes	c__Bacilli	o__RF39	f__norank_o__RF39	g__norank_f__norank_o__RF39	s__unclassified_g__norank_f__norank_o__RF39	OTU259	17	51	50	9	32	11	75	2	0	212	459
d__Bacteria	k__norank_d__Bacteria	p__Proteobacteria	c__Gammaproteobacteria	o__Competibacterales	f__Competibacteraceae	g__Candidatus_Competibacter	s__uncultured_bacterium_g__Candidatus_Competibacter	OTU992	0	2	1	0	1	0	0	0	1	0	5
d__Bacteria	k__norank_d__Bacteria	p__Proteobacteria	c__Alphaproteobacteria	o__Rhodobacterales	f__Rhodobacteraceae	g__unclassified_f__Rhodobacteraceae	s__unclassified_f__Rhodobacteraceae	OTU786	0	0	0	0	1	0	0	3	0	0	4
d__Bacteria	k__norank_d__Bacteria	p__Fusobacteriota	c__Fusobacteriia	o__Fusobacteriales	f__Fusobacteriaceae	g__Fusobacterium	s__unclassified_g__Fusobacterium	OTU565	0	0	0	0	691	135	0	25	0	0	851
d__Bacteria	k__norank_d__Bacteria	p__Desulfobacterota	c__Syntrophobacteria	o__Syntrophobacterales	f__Syntrophobacteraceae	g__Syntrophobacter	s__unclassified_g__Syntrophobacter	OTU914	2	2	1	1	0	3	1	0	1	0	11
d__Bacteria	k__norank_d__Bacteria	p__Verrucomicrobiota	c__Verrucomicrobiae	o__Verrucomicrobiales	f__Rubritaleaceae	g__Luteolibacter	s__unclassified_g__Luteolibacter	OTU270	1	0	2	0	0	1	2	0	0	0	6
d__Bacteria	k__norank_d__Bacteria	p__Proteobacteria	c__Gammaproteobacteria	o__Legionellales	f__Legionellaceae	g__Legionella	s__uncultured_bacterium_g__Legionella	OTU592	0	0	0	2	0	0	1	0	1	0	4
d__Bacteria	k__norank_d__Bacteria	p__Bacteroidota	c__Bacteroidia	o__Chitinophagales	f__Saprospiraceae	g__norank_f__Saprospiraceae	s__unclassified_g__norank_f__Saprospiraceae	OTU384	0	0	0	0	0	0	0	1	0	0	1
d__Bacteria	k__norank_d__Bacteria	p__Proteobacteria	c__Gammaproteobacteria	o__Pseudomonadales	f__Pseudomonadaceae	g__Pseudomonas	s__Pseudomonas_rhizosphaerae	OTU962	1	1	0	0	0	0	0	0	0	0	2
d__Bacteria	k__norank_d__Bacteria	p__Patescibacteria	c__Saccharimonadia	o__Saccharimonadales	f__norank_o__Saccharimonadales	g__norank_f__norank_o__Saccharimonadales	s__unclassified_g__norank_f__norank_o__Saccharimonadales	OTU725	0	0	0	107	0	1	0	0	0	0	108
d__Bacteria	k__norank_d__Bacteria	p__Actinobacteriota	c__WCHB1-81	o__norank_c__WCHB1-81	f__norank_o__norank_c__WCHB1-81	g__norank_f__norank_o__norank_c__WCHB1-81	s__uncultured_bacterium_g__norank_f__norank_o__norank_c__WCHB1-81	OTU4	2	7	2	1	1	0	3	1	1	0	18
d__Bacteria	k__norank_d__Bacteria	p__Proteobacteria	c__Alphaproteobacteria	o__Sphingomonadales	f__Sphingomonadaceae	g__Novosphingobium	s__uncultured_bacterium_g__Novosphingobium	OTU999	10	17	10	2	19	7	0	14	8	28	115
d__Bacteria	k__norank_d__Bacteria	p__Proteobacteria	c__Gammaproteobacteria	o__Pseudomonadales	f__Moraxellaceae	g__Acinetobacter	s__Acinetobacter_haemolyticus	OTU196	0	0	1	0	0	0	0	0	0	0	1
d__Bacteria	k__norank_d__Bacteria	p__Bacteroidota	c__Bacteroidia	o__Chitinophagales	f__Chitinophagaceae	g__Aurantisolimonas	s__uncultured_bacterium_g__Aurantisolimonas	OTU526	0	0	0	0	1	0	0	0	0	1	2
d__Bacteria	k__norank_d__Bacteria	p__Patescibacteria	c__Saccharimonadia	o__Saccharimonadales	f__unclassified_o__Saccharimonadales	g__unclassified_o__Saccharimonadales	s__unclassified_o__Saccharimonadales	OTU870	1	0	1	0	0	0	1	1	0	0	4
d__Bacteria	k__norank_d__Bacteria	p__Desulfobacterota	c__Desulfobaccia	o__Desulfobaccales	f__Desulfobaccaceae	g__Desulfobacca	s__uncultured_delta_proteobacterium_g__Desulfobacca	OTU627	0	1	1	0	0	1	0	0	1	0	4
d__Bacteria	k__norank_d__Bacteria	p__Actinobacteriota	c__Acidimicrobiia	o__Microtrichales	f__norank_o__Microtrichales	g__norank_f__norank_o__Microtrichales	s__metagenome_g__norank_f__norank_o__Microtrichales	OTU523	0	0	0	0	0	0	0	0	1	0	1
d__Bacteria	k__norank_d__Bacteria	p__Patescibacteria	c__WWE3	o__norank_c__WWE3	f__norank_o__norank_c__WWE3	g__norank_f__norank_o__norank_c__WWE3	s__uncultured_candidate_division_WWE3_bacterium	OTU797	0	0	0	0	0	0	0	2	0	0	2
d__Bacteria	k__norank_d__Bacteria	p__Proteobacteria	c__Alphaproteobacteria	o__norank_c__Alphaproteobacteria	f__norank_o__norank_c__Alphaproteobacteria	g__norank_f__norank_o__norank_c__Alphaproteobacteria	s__unclassified_g__norank_f__norank_o__norank_c__Alphaproteobacteria	OTU874	0	0	1	0	0	0	0	0	2	0	3
d__Bacteria	k__norank_d__Bacteria	p__unclassified_k__norank_d__Bacteria	c__unclassified_k__norank_d__Bacteria	o__unclassified_k__norank_d__Bacteria	f__unclassified_k__norank_d__Bacteria	g__unclassified_k__norank_d__Bacteria	s__unclassified_k__norank_d__Bacteria	OTU84	0	2	0	0	0	0	0	0	0	0	2
d__Bacteria	k__norank_d__Bacteria	p__Acidobacteriota	c__Vicinamibacteria	o__Subgroup_17	f__norank_o__Subgroup_17	g__norank_f__norank_o__Subgroup_17	s__metagenome_g__norank_f__norank_o__Subgroup_17	OTU570	1	1	0	0	1	0	0	1	0	1	5
d__Bacteria	k__norank_d__Bacteria	p__Firmicutes	c__Clostridia	o__Clostridiales	f__Clostridiaceae	g__unclassified_f__Clostridiaceae	s__unclassified_f__Clostridiaceae	OTU10	2	4	0	0	0	0	5	1	0	0	12
d__Bacteria	k__norank_d__Bacteria	p__Actinobacteriota	c__Actinobacteria	o__PeM15	f__norank_o__PeM15	g__norank_f__norank_o__PeM15	s__metagenome_g__norank_f__norank_o__PeM15	OTU3	11	39	3	6	1	1	4	14	15	1	95
d__Bacteria	k__norank_d__Bacteria	p__Firmicutes	c__Clostridia	o__Lachnospirales	f__Lachnospiraceae	g__unclassified_f__Lachnospiraceae	s__unclassified_f__Lachnospiraceae	OTU866	1	1	0	4	0	0	1	0	0	0	7
d__Bacteria	k__norank_d__Bacteria	p__Proteobacteria	c__Gammaproteobacteria	o__Pseudomonadales	f__Moraxellaceae	g__Acinetobacter	s__unclassified_g__Acinetobacter	OTU652	0	1	0	0	0	0	0	1	0	0	2
d__Bacteria	k__norank_d__Bacteria	p__Acidobacteriota	c__Vicinamibacteria	o__Vicinamibacterales	f__norank_o__Vicinamibacterales	g__norank_f__norank_o__Vicinamibacterales	s__uncultured_soil_bacterium_g__norank_f__norank_o__Vicinamibacterales	OTU274	1	0	2	0	1	0	0	1	0	0	5
d__Bacteria	k__norank_d__Bacteria	p__Proteobacteria	c__Gammaproteobacteria	o__Cellvibrionales	f__Halieaceae	g__OM60NOR5_clade	s__uncultured_bacterium_g__OM60NOR5_clade	OTU177	1	6	8	0	2	2	3	2	4	3	31
d__Bacteria	k__norank_d__Bacteria	p__Patescibacteria	c__Saccharimonadia	o__Saccharimonadales	f__LWQ8	g__norank_f__LWQ8	s__uncultured_bacterium_g__norank_f__LWQ8	OTU602	20	48	11	3	6	2	7	7	18	9	131
d__Bacteria	k__norank_d__Bacteria	p__Proteobacteria	c__Alphaproteobacteria	o__Acetobacterales	f__Acetobacteraceae	g__Roseomonas	s__metagenome_g__Roseomonas	OTU306	1	1	1	0	0	2	0	0	0	0	5
d__Bacteria	k__norank_d__Bacteria	p__Proteobacteria	c__Gammaproteobacteria	o__Run-SP154	f__norank_o__Run-SP154	g__norank_f__norank_o__Run-SP154	s__metagenome_g__norank_f__norank_o__Run-SP154	OTU290	59	166	75	81	5	8	103	44	128	13	682
d__Bacteria	k__norank_d__Bacteria	p__Actinobacteriota	c__Actinobacteria	o__Frankiales	f__Sporichthyaceae	g__Longivirga	s__uncultured_bacterium_g__Longivirga	OTU696	0	1	0	0	0	0	0	0	1	0	2
d__Bacteria	k__norank_d__Bacteria	p__Chloroflexi	c__Anaerolineae	o__Anaerolineales	f__Anaerolineaceae	g__norank_f__Anaerolineaceae	s__unclassified_g__norank_f__Anaerolineaceae	OTU732	0	7	0	1	0	0	0	1	0	0	9
d__Bacteria	k__norank_d__Bacteria	p__Firmicutes	c__Clostridia	o__Clostridiales	f__Clostridiaceae	g__unclassified_f__Clostridiaceae	s__unclassified_f__Clostridiaceae	OTU995	3	2	2	5	1	0	1	0	2	0	16
d__Bacteria	k__norank_d__Bacteria	p__Chloroflexi	c__SHA-26	o__norank_c__SHA-26	f__norank_o__norank_c__SHA-26	g__norank_f__norank_o__norank_c__SHA-26	s__uncultured_bacterium_g__norank_f__norank_o__norank_c__SHA-26	OTU1104	0	0	0	0	0	0	0	0	0	1	1
d__Bacteria	k__norank_d__Bacteria	p__Patescibacteria	c__Gracilibacteria	o__Absconditabacteriales_SR1	f__norank_o__Absconditabacteriales_SR1	g__norank_f__norank_o__Absconditabacteriales_SR1	s__unclassified_g__norank_f__norank_o__Absconditabacteriales_SR1	OTU385	0	0	0	0	0	1	0	0	0	0	1
d__Bacteria	k__norank_d__Bacteria	p__Chloroflexi	c__Anaerolineae	o__Caldilineales	f__Caldilineaceae	g__norank_f__Caldilineaceae	s__uncultured_bacterium_g__norank_f__Caldilineaceae	OTU515	1	1	0	0	0	0	1	1	1	0	5
d__Bacteria	k__norank_d__Bacteria	p__Patescibacteria	c__Dojkabacteria	o__norank_c__Dojkabacteria	f__norank_o__norank_c__Dojkabacteria	g__norank_f__norank_o__norank_c__Dojkabacteria	s__unclassified_g__norank_f__norank_o__norank_c__Dojkabacteria	OTU635	0	0	0	0	1	1	0	1	0	0	3
d__Bacteria	k__norank_d__Bacteria	p__Verrucomicrobiota	c__Chlamydiae	o__Chlamydiales	f__cvE6	g__norank_f__cvE6	s__uncultured_bacterium_g__norank_f__cvE6	OTU152	0	1	1	0	0	0	0	0	0	1	3
d__Bacteria	k__norank_d__Bacteria	p__Firmicutes	c__Clostridia	o__norank_c__Clostridia	f__Hungateiclostridiaceae	g__norank_f__Hungateiclostridiaceae	s__uncultured_bacterium_g__norank_f__Hungateiclostridiaceae	OTU91	0	3	0	0	0	1	0	1	0	1	6
d__Bacteria	k__norank_d__Bacteria	p__Acidobacteriota	c__Vicinamibacteria	o__Vicinamibacterales	f__norank_o__Vicinamibacterales	g__norank_f__norank_o__Vicinamibacterales	s__unclassified_g__norank_f__norank_o__Vicinamibacterales	OTU119	0	2	0	0	0	0	0	0	0	0	2
d__Bacteria	k__norank_d__Bacteria	p__Proteobacteria	c__Gammaproteobacteria	o__Enterobacterales	f__Morganellaceae	g__Morganella	s__Morganella_morganii	OTU423	0	2	412	0	0	0	1160	0	0	1	1575
d__Bacteria	k__norank_d__Bacteria	p__Acidobacteriota	c__Vicinamibacteria	o__Subgroup_17	f__norank_o__Subgroup_17	g__norank_f__norank_o__Subgroup_17	s__unclassified_g__norank_f__norank_o__Subgroup_17	OTU748	0	2	0	0	0	0	2	1	0	0	5
d__Bacteria	k__norank_d__Bacteria	p__Firmicutes	c__Clostridia	o__Christensenellales	f__Christensenellaceae	g__Christensenellaceae_R-7_group	s__unclassified_g__Christensenellaceae_R-7_group	OTU759	1	4	0	2	0	0	1	0	2	0	10
d__Bacteria	k__norank_d__Bacteria	p__Proteobacteria	c__Alphaproteobacteria	o__Rhizobiales	f__Hyphomicrobiaceae	g__Hyphomicrobium	s__unclassified_g__Hyphomicrobium	OTU70	7	12	2	2	0	1	6	1	4	2	37
d__Bacteria	k__norank_d__Bacteria	p__Patescibacteria	c__Saccharimonadia	o__Saccharimonadales	f__Saccharimonadaceae	g__TM7a	s__uncultured_bacterium_g__TM7a	OTU792	6	4	0	0	1	2	0	6	0	1	20
d__Bacteria	k__norank_d__Bacteria	p__WS2	c__norank_p__WS2	o__norank_c__norank_p__WS2	f__norank_o__norank_c__norank_p__WS2	g__norank_f__norank_o__norank_c__norank_p__WS2	s__unclassified_g__norank_f__norank_o__norank_c__norank_p__WS2	OTU293	0	1	3	0	0	0	1	0	0	0	5
d__Bacteria	k__norank_d__Bacteria	p__Acidobacteriota	c__Subgroup_22	o__norank_c__Subgroup_22	f__norank_o__norank_c__Subgroup_22	g__norank_f__norank_o__norank_c__Subgroup_22	s__uncultured_bacterium_g__norank_f__norank_o__norank_c__Subgroup_22	OTU347	0	1	2	0	0	1	0	0	0	0	4
d__Bacteria	k__norank_d__Bacteria	p__Bacteroidota	c__Rhodothermia	o__Rhodothermales	f__Rhodothermaceae	g__Rubrivirga	s__uncultured_bacterium_g__Rubrivirga	OTU572	0	0	0	0	1	0	0	3	0	1	5
d__Bacteria	k__norank_d__Bacteria	p__Verrucomicrobiota	c__Kiritimatiellae	o__WCHB1-41	f__norank_o__WCHB1-41	g__norank_f__norank_o__WCHB1-41	s__unclassified_g__norank_f__norank_o__WCHB1-41	OTU94	0	2	0	0	0	0	0	0	0	0	2
d__Bacteria	k__norank_d__Bacteria	p__Bacteroidota	c__Bacteroidia	o__Sphingobacteriales	f__NS11-12_marine_group	g__norank_f__NS11-12_marine_group	s__metagenome_g__norank_f__NS11-12_marine_group	OTU571	0	0	0	0	2	0	0	0	0	0	2
d__Bacteria	k__norank_d__Bacteria	p__Patescibacteria	c__CPR2	o__norank_c__CPR2	f__norank_o__norank_c__CPR2	g__norank_f__norank_o__norank_c__CPR2	s__unclassified_g__norank_f__norank_o__norank_c__CPR2	OTU139	2	3	0	1	0	0	2	2	1	0	11
d__Bacteria	k__norank_d__Bacteria	p__Verrucomicrobiota	c__Verrucomicrobiae	o__Chthoniobacterales	f__Chthoniobacteraceae	g__LD29	s__uncultured_bacterium_g__LD29	OTU661	68	81	30	24	4	14	17	25	31	14	308
d__Bacteria	k__norank_d__Bacteria	p__Proteobacteria	c__Gammaproteobacteria	o__unclassified_c__Gammaproteobacteria	f__unclassified_c__Gammaproteobacteria	g__unclassified_c__Gammaproteobacteria	s__unclassified_c__Gammaproteobacteria	OTU40	1	1	0	0	0	0	1	0	0	0	3
d__Bacteria	k__norank_d__Bacteria	p__Desulfobacterota	c__Desulfobaccia	o__Desulfobaccales	f__Desulfobaccaceae	g__Desulfobacca	s__uncultured_bacterium_g__Desulfobacca	OTU9	2	6	0	0	0	0	1	0	1	0	10
d__Bacteria	k__norank_d__Bacteria	p__Bacteroidota	c__Bacteroidia	o__Bacteroidales	f__Prolixibacteraceae	g__norank_f__Prolixibacteraceae	s__uncultured_soil_bacterium_g__norank_f__Prolixibacteraceae	OTU587	0	0	0	0	0	1	0	0	0	1	2
d__Bacteria	k__norank_d__Bacteria	p__Firmicutes	c__Bacilli	o__Bacillales	f__Planococcaceae	g__Lysinibacillus	s__unclassified_g__Lysinibacillus	OTU1069	0	0	0	0	0	0	0	0	2	0	2
d__Bacteria	k__norank_d__Bacteria	p__Firmicutes	c__Clostridia	o__Lachnospirales	f__Defluviitaleaceae	g__Defluviitaleaceae_UCG-011	s__microbial_mat_metagenome_g__Defluviitaleaceae_UCG-011	OTU1145	1	0	0	0	0	0	0	0	0	1	2
d__Bacteria	k__norank_d__Bacteria	p__Firmicutes	c__Bacilli	o__Bacillales	f__Planococcaceae	g__Planococcus	s__Planococcus_rifietoensis	OTU612	1	0	0	0	0	1	0	2	0	1	5
d__Bacteria	k__norank_d__Bacteria	p__Proteobacteria	c__Alphaproteobacteria	o__Sphingomonadales	f__Sphingomonadaceae	g__Altererythrobacter	s__unclassified_g__Altererythrobacter	OTU1098	0	1	0	0	0	2	0	0	0	2	5
d__Bacteria	k__norank_d__Bacteria	p__Proteobacteria	c__Alphaproteobacteria	o__Rhizobiales	f__Rhizobiales_Incertae_Sedis	g__Phreatobacter	s__uncultured_bacterium_g__Phreatobacter	OTU151	0	1	0	0	0	0	1	0	0	1	3
d__Bacteria	k__norank_d__Bacteria	p__Chloroflexi	c__Anaerolineae	o__Caldilineales	f__Caldilineaceae	g__norank_f__Caldilineaceae	s__metagenome_g__norank_f__Caldilineaceae	OTU606	2	4	0	1	1	0	5	1	0	0	14
d__Bacteria	k__norank_d__Bacteria	p__Desulfobacterota	c__Syntrophobacteria	o__Syntrophobacterales	f__Syntrophobacteraceae	g__norank_f__Syntrophobacteraceae	s__uncultured_bacterium_g__norank_f__Syntrophobacteraceae	OTU521	0	1	0	0	0	0	0	0	3	0	4
d__Bacteria	k__norank_d__Bacteria	p__Patescibacteria	c__Berkelbacteria	o__norank_c__Berkelbacteria	f__norank_o__norank_c__Berkelbacteria	g__norank_f__norank_o__norank_c__Berkelbacteria	s__Berkelbacteria_bacterium_GW2011_GWE1_39_12	OTU858	1	0	0	0	0	0	0	0	0	0	1
d__Bacteria	k__norank_d__Bacteria	p__SAR324_cladeMarine_group_B	c__norank_p__SAR324_cladeMarine_group_B	o__norank_c__norank_p__SAR324_cladeMarine_group_B	f__norank_o__norank_c__norank_p__SAR324_cladeMarine_group_B	g__norank_f__norank_o__norank_c__norank_p__SAR324_cladeMarine_group_B	s__bacterium_enrichment_culture_clone_B302011	OTU537	0	2	2	1	0	0	3	1	0	0	9
d__Bacteria	k__norank_d__Bacteria	p__Firmicutes	c__Bacilli	o__Entomoplasmatales	f__Entomoplasmatales_Incertae_Sedis	g__Candidatus_Hepatoplasma	s__unclassified_g__Candidatus_Hepatoplasma	OTU591	0	18	0	1791	9	0	4	2492	434	0	4748
d__Bacteria	k__norank_d__Bacteria	p__Acidobacteriota	c__Aminicenantia	o__Aminicenantales	f__norank_o__Aminicenantales	g__norank_f__norank_o__Aminicenantales	s__unclassified_g__norank_f__norank_o__Aminicenantales	OTU251	0	0	1	0	0	1	0	0	0	0	2
d__Bacteria	k__norank_d__Bacteria	p__Bacteroidota	c__Bacteroidia	o__Bacteroidales	f__Prolixibacteraceae	g__norank_f__Prolixibacteraceae	s__uncultured_prokaryote_g__norank_f__Prolixibacteraceae	OTU340	0	0	0	0	0	0	0	1	0	1	2
d__Bacteria	k__norank_d__Bacteria	p__Desulfobacterota	c__Desulfomonilia	o__Desulfomonilales	f__Desulfomonilaceae	g__Desulfomonile	s__uncultured_bacterium_g__Desulfomonile	OTU793	0	3	1	0	0	0	1	1	0	0	6
d__Bacteria	k__norank_d__Bacteria	p__Chloroflexi	c__Ktedonobacteria	o__Ktedonobacterales	f__Ktedonobacteraceae	g__norank_f__Ktedonobacteraceae	s__uncultured_bacterium_g__norank_f__Ktedonobacteraceae	OTU771	1	2	1	2	0	0	6	1	0	0	13
d__Bacteria	k__norank_d__Bacteria	p__Patescibacteria	c__Saccharimonadia	o__Saccharimonadales	f__unclassified_o__Saccharimonadales	g__unclassified_o__Saccharimonadales	s__unclassified_o__Saccharimonadales	OTU970	2	0	1	1	2	0	0	4	0	4	14
d__Bacteria	k__norank_d__Bacteria	p__Actinobacteriota	c__Acidimicrobiia	o__Microtrichales	f__Ilumatobacteraceae	g__CL500-29_marine_group	s__uncultured_bacterium_g__CL500-29_marine_group	OTU138	3	7	0	3	0	1	2	2	2	1	21
d__Bacteria	k__norank_d__Bacteria	p__Patescibacteria	c__Dojkabacteria	o__norank_c__Dojkabacteria	f__norank_o__norank_c__Dojkabacteria	g__norank_f__norank_o__norank_c__Dojkabacteria	s__uncultured_anaerobic_bacterium_g__norank_f__norank_o__norank_c__Dojkabacteria	OTU871	0	0	1	3	0	0	2	0	1	0	7
d__Bacteria	k__norank_d__Bacteria	p__Firmicutes	c__Clostridia	o__Clostridiales	f__Clostridiaceae	g__Proteiniclasticum	s__uncultured_bacterium_g__Proteiniclasticum	OTU1066	0	0	0	0	0	8	0	0	0	0	8
d__Bacteria	k__norank_d__Bacteria	p__Deinococcota	c__Deinococci	o__Deinococcales	f__Deinococcaceae	g__Deinococcus	s__Deinococcus_ficus	OTU1067	1	0	0	0	1	0	0	1	0	0	3
d__Bacteria	k__norank_d__Bacteria	p__Cyanobacteria	c__Cyanobacteriia	o__Chloroplast	f__norank_o__Chloroplast	g__norank_f__norank_o__Chloroplast	s__Raphidocelis_subcapitata	OTU538	1	5	0	1	0	0	0	0	0	0	7
d__Bacteria	k__norank_d__Bacteria	p__Firmicutes	c__Bacilli	o__Mycoplasmatales	f__Mycoplasmataceae	g__Candidatus_Bacilloplasma	s__uncultured_bacterium_g__Candidatus_Bacilloplasma	OTU852	3	0	0	0	0	0	0	0	1	1	5
d__Bacteria	k__norank_d__Bacteria	p__Bdellovibrionota	c__Bdellovibrionia	o__Bdellovibrionales	f__Bdellovibrionaceae	g__Bdellovibrio	s__unclassified_g__Bdellovibrio	OTU189	0	0	0	0	0	0	0	1	0	0	1
d__Bacteria	k__norank_d__Bacteria	p__Actinobacteriota	c__Actinobacteria	o__unclassified_c__Actinobacteria	f__unclassified_c__Actinobacteria	g__unclassified_c__Actinobacteria	s__unclassified_c__Actinobacteria	OTU817	0	0	0	0	0	0	0	1	1	0	2
d__Bacteria	k__norank_d__Bacteria	p__Proteobacteria	c__Alphaproteobacteria	o__Rhodobacterales	f__Rhodobacteraceae	g__unclassified_f__Rhodobacteraceae	s__unclassified_f__Rhodobacteraceae	OTU598	3	0	2	0	0	0	1	0	0	1	7
d__Bacteria	k__norank_d__Bacteria	p__Bacteroidota	c__Kryptonia	o__Kryptoniales	f__MSB-3C8	g__norank_f__MSB-3C8	s__metagenome_g__norank_f__MSB-3C8	OTU1143	0	0	0	0	0	1	0	2	0	2	5
d__Bacteria	k__norank_d__Bacteria	p__Bacteroidota	c__Bacteroidia	o__Sphingobacteriales	f__Lentimicrobiaceae	g__norank_f__Lentimicrobiaceae	s__unclassified_g__norank_f__Lentimicrobiaceae	OTU338	0	0	0	1	0	0	0	0	0	0	1
d__Bacteria	k__norank_d__Bacteria	p__Actinobacteriota	c__Actinobacteria	o__Streptomycetales	f__Streptomycetaceae	g__Streptomyces	s__Streptomyces_scabiei	OTU1021	0	0	0	1	0	1	0	0	0	0	2
d__Bacteria	k__norank_d__Bacteria	p__Chloroflexi	c__Anaerolineae	o__Anaerolineales	f__Anaerolineaceae	g__norank_f__Anaerolineaceae	s__unclassified_g__norank_f__Anaerolineaceae	OTU607	5	27	5	16	2	4	24	9	9	4	105
d__Bacteria	k__norank_d__Bacteria	p__Bacteroidota	c__Bacteroidia	o__Chitinophagales	f__Chitinophagaceae	g__Puia	s__unclassified_g__Puia	OTU959	0	0	0	0	0	0	0	0	0	1	1
d__Bacteria	k__norank_d__Bacteria	p__Proteobacteria	c__Gammaproteobacteria	o__Burkholderiales	f__B1-7BS	g__norank_f__B1-7BS	s__uncultured_Denitratisoma_sp._g__norank_f__B1-7BS	OTU29	1	0	0	0	0	0	0	0	0	4	5
d__Bacteria	k__norank_d__Bacteria	p__Bacteroidota	c__Bacteroidia	o__Flavobacteriales	f__NS9_marine_group	g__norank_f__NS9_marine_group	s__metagenome_g__norank_f__NS9_marine_group	OTU775	0	0	0	0	0	0	0	1	0	0	1
d__Bacteria	k__norank_d__Bacteria	p__Proteobacteria	c__Gammaproteobacteria	o__Legionellales	f__Legionellaceae	g__Legionella	s__uncultured_bacterium_g__Legionella	OTU329	0	0	1	0	0	0	0	0	1	1	3
d__Bacteria	k__norank_d__Bacteria	p__Actinobacteriota	c__Actinobacteria	o__Micrococcales	f__Microbacteriaceae	g__Leucobacter	s__uncultured_bacterium_g__Leucobacter	OTU502	0	4	0	0	0	0	0	0	0	0	4
d__Bacteria	k__norank_d__Bacteria	p__Verrucomicrobiota	c__Chlamydiae	o__Chlamydiales	f__Simkaniaceae	g__norank_f__Simkaniaceae	s__marine_sediment_metagenome_g__norank	OTU444	0	1	0	1	0	0	1	0	0	0	3
d__Bacteria	k__norank_d__Bacteria	p__Bacteroidota	c__Bacteroidia	o__Flavobacteriales	f__Weeksellaceae	g__Chryseobacterium	s__uncultured_bacterium_g__Chryseobacterium	OTU459	0	2	1	0	0	2	1	1	0	0	7
d__Bacteria	k__norank_d__Bacteria	p__Proteobacteria	c__Alphaproteobacteria	o__Rickettsiales	f__norank_o__Rickettsiales	g__norank_f__norank_o__Rickettsiales	s__uncultured_bacterium_g__norank_f__norank_o__Rickettsiales	OTU838	17	0	0	0	157	0	0	4	0	5	183
d__Bacteria	k__norank_d__Bacteria	p__Verrucomicrobiota	c__Chlamydiae	o__Chlamydiales	f__cvE6	g__norank_f__cvE6	s__uncultured_bacterium_g__norank_f__cvE6	OTU980	0	0	0	0	0	0	0	0	1	0	1
d__Bacteria	k__norank_d__Bacteria	p__Actinobacteriota	c__Actinobacteria	o__unclassified_c__Actinobacteria	f__unclassified_c__Actinobacteria	g__unclassified_c__Actinobacteria	s__unclassified_c__Actinobacteria	OTU442	0	0	0	1	1	0	0	0	1	0	3
d__Bacteria	k__norank_d__Bacteria	p__Proteobacteria	c__Gammaproteobacteria	o__Burkholderiales	f__Rhodocyclaceae	g__Sulfuritalea	s__uncultured_bacterium_g__Sulfuritalea	OTU395	0	0	0	0	1	0	0	0	0	0	1
d__Bacteria	k__norank_d__Bacteria	p__Patescibacteria	c__WWE3	o__norank_c__WWE3	f__norank_o__norank_c__WWE3	g__norank_f__norank_o__norank_c__WWE3	s__unclassified_g__norank_f__norank_o__norank_c__WWE3	OTU441	2	0	0	2	0	0	1	0	0	0	5
d__Bacteria	k__norank_d__Bacteria	p__Proteobacteria	c__Alphaproteobacteria	o__Rhizobiales	f__Beijerinckiaceae	g__alphaI_cluster	s__metagenome_g__alphaI_cluster	OTU456	0	1	0	1	0	0	1	0	0	2	5
d__Bacteria	k__norank_d__Bacteria	p__Acidobacteriota	c__Vicinamibacteria	o__Vicinamibacterales	f__Vicinamibacteraceae	g__Luteitalea	s__uncultured_bacterium_g__Luteitalea	OTU752	0	0	0	0	0	0	1	0	1	0	2
d__Bacteria	k__norank_d__Bacteria	p__Cyanobacteria	c__Cyanobacteriia	o__Chloroplast	f__norank_o__Chloroplast	g__norank_f__norank_o__Chloroplast	s__unclassified_g__norank_f__norank_o__Chloroplast	OTU609	0	4	0	2	2	0	3	3	0	2	16
d__Bacteria	k__norank_d__Bacteria	p__Firmicutes	c__Clostridia	o__Lachnospirales	f__Lachnospiraceae	g__XBB1006	s__uncultured_bacterium_g__XBB1006	OTU979	0	0	0	0	0	0	0	0	1	0	1
d__Bacteria	k__norank_d__Bacteria	p__Chloroflexi	c__Anaerolineae	o__SBR1031	f__A4b	g__norank_f__A4b	s__uncultured_bacterium_g__norank_f__A4b	OTU643	1	0	0	0	1	1	0	0	0	0	3
d__Bacteria	k__norank_d__Bacteria	p__Cyanobacteria	c__Sericytochromatia	o__norank_c__Sericytochromatia	f__norank_o__norank_c__Sericytochromatia	g__norank_f__norank_o__norank_c__Sericytochromatia	s__Hyaloperonospora_arabidopsidis_g__norank	OTU52	0	1	0	0	0	0	0	0	0	0	1
d__Bacteria	k__norank_d__Bacteria	p__Cyanobacteria	c__Cyanobacteriia	o__Cyanobacteriales	f__Phormidiaceae	g__Planktothrix_NIVA-CYA_15	s__uncultured_bacterium_g__Planktothrix_NIVA-CYA_15	OTU47	8	4	1	3	0	1	9	21	0	3	50
d__Bacteria	k__norank_d__Bacteria	p__Patescibacteria	c__Saccharimonadia	o__Saccharimonadales	f__Saccharimonadaceae	g__TM7a	s__uncultured_bacterium_g__TM7a	OTU8	2	0	0	0	0	0	0	0	0	0	2
d__Bacteria	k__norank_d__Bacteria	p__Actinobacteriota	c__Thermoleophilia	o__Gaiellales	f__norank_o__Gaiellales	g__norank_f__norank_o__Gaiellales	s__uncultured_bacterium_g__norank_f__norank_o__Gaiellales	OTU186	0	0	0	0	0	1	1	0	0	0	2
d__Bacteria	k__norank_d__Bacteria	p__Proteobacteria	c__Gammaproteobacteria	o__Pseudomonadales	f__Pseudomonadaceae	g__Pseudomonas	s__unclassified_g__Pseudomonas	OTU476	0	0	0	0	1	0	0	0	0	0	1
d__Bacteria	k__norank_d__Bacteria	p__Bacteroidota	c__Bacteroidia	o__Bacteroidales	f__Dysgonomonadaceae	g__Dysgonomonas	s__unclassified_g__Dysgonomonas	OTU44	127	3	241	21	578	54	787	8	23	335	2177
d__Bacteria	k__norank_d__Bacteria	p__Patescibacteria	c__Saccharimonadia	o__Saccharimonadales	f__norank_o__Saccharimonadales	g__norank_f__norank_o__Saccharimonadales	s__unclassified_g__norank_f__norank_o__Saccharimonadales	OTU1099	9	6	0	0	1	0	0	0	0	2	18
d__Bacteria	k__norank_d__Bacteria	p__Dependentiae	c__Babeliae	o__Babeliales	f__UBA12409	g__norank_f__UBA12409	s__uncultured_bacterium_g__norank_f__UBA12409	OTU975	0	0	0	0	0	0	0	0	2	0	2
d__Bacteria	k__norank_d__Bacteria	p__Sva0485	c__norank_p__Sva0485	o__norank_c__norank_p__Sva0485	f__norank_o__norank_c__norank_p__Sva0485	g__norank_f__norank_o__norank_c__norank_p__Sva0485	s__uncultured_bacterium_g__norank_f__norank_o__norank_c__norank_p__Sva0485	OTU146	0	3	1	1	0	1	0	0	1	1	8
d__Bacteria	k__norank_d__Bacteria	p__unclassified_k__norank_d__Bacteria	c__unclassified_k__norank_d__Bacteria	o__unclassified_k__norank_d__Bacteria	f__unclassified_k__norank_d__Bacteria	g__unclassified_k__norank_d__Bacteria	s__unclassified_k__norank_d__Bacteria	OTU528	0	1	0	0	0	0	1	0	1	1	4
d__Bacteria	k__norank_d__Bacteria	p__Actinobacteriota	c__Actinobacteria	o__PeM15	f__norank_o__PeM15	g__norank_f__norank_o__PeM15	s__metagenome_g__norank_f__norank_o__PeM15	OTU569	0	1	0	1	1	0	0	0	0	0	3
d__Bacteria	k__norank_d__Bacteria	p__Proteobacteria	c__Alphaproteobacteria	o__Rhizobiales	f__unclassified_o__Rhizobiales	g__unclassified_o__Rhizobiales	s__unclassified_o__Rhizobiales	OTU1000	1	3	0	1	0	0	1	0	2	0	8
d__Bacteria	k__norank_d__Bacteria	p__Proteobacteria	c__Alphaproteobacteria	o__Rhizobiales	f__Methyloligellaceae	g__norank_f__Methyloligellaceae	s__unclassified_g__norank_f__Methyloligellaceae	OTU1014	0	0	1	0	0	0	0	0	1	0	2
d__Bacteria	k__norank_d__Bacteria	p__unclassified_k__norank_d__Bacteria	c__unclassified_k__norank_d__Bacteria	o__unclassified_k__norank_d__Bacteria	f__unclassified_k__norank_d__Bacteria	g__unclassified_k__norank_d__Bacteria	s__unclassified_k__norank_d__Bacteria	OTU288	0	0	1	0	0	0	0	0	0	0	1
d__Bacteria	k__norank_d__Bacteria	p__unclassified_k__norank_d__Bacteria	c__unclassified_k__norank_d__Bacteria	o__unclassified_k__norank_d__Bacteria	f__unclassified_k__norank_d__Bacteria	g__unclassified_k__norank_d__Bacteria	s__unclassified_k__norank_d__Bacteria	OTU445	0	0	0	1	0	0	0	0	0	0	1
d__Bacteria	k__norank_d__Bacteria	p__Proteobacteria	c__Gammaproteobacteria	o__Burkholderiales	f__Sutterellaceae	g__norank_f__Sutterellaceae	s__unclassified_g__norank_f__Sutterellaceae	OTU916	5	17	16	0	3	5	6	2	14	0	68
d__Bacteria	k__norank_d__Bacteria	p__Bacteroidota	c__Bacteroidia	o__Flavobacteriales	f__Weeksellaceae	g__unclassified_f__Weeksellaceae	s__unclassified_f__Weeksellaceae	OTU421	2	0	3	2	5	15	7	1	5	3	43
d__Bacteria	k__norank_d__Bacteria	p__Actinobacteriota	c__Acidimicrobiia	o__Microtrichales	f__Ilumatobacteraceae	g__CL500-29_marine_group	s__unclassified_g__CL500-29_marine_group	OTU1113	2	0	0	0	0	0	0	0	0	1	3
d__Bacteria	k__norank_d__Bacteria	p__Cyanobacteria	c__Cyanobacteriia	o__Chloroplast	f__norank_o__Chloroplast	g__norank_f__norank_o__Chloroplast	s__unclassified_g__norank_f__norank_o__Chloroplast	OTU262	0	1	1	0	0	0	0	0	0	0	2
d__Bacteria	k__norank_d__Bacteria	p__Bacteroidota	c__Bacteroidia	o__Cytophagales	f__Spirosomaceae	g__unclassified_f__Spirosomaceae	s__unclassified_f__Spirosomaceae	OTU633	0	0	0	0	0	2	0	0	0	0	2
d__Bacteria	k__norank_d__Bacteria	p__Acidobacteriota	c__unclassified_p__Acidobacteriota	o__unclassified_p__Acidobacteriota	f__unclassified_p__Acidobacteriota	g__unclassified_p__Acidobacteriota	s__unclassified_p__Acidobacteriota	OTU261	1	4	2	1	0	0	2	1	1	0	12
d__Bacteria	k__norank_d__Bacteria	p__Firmicutes	c__Clostridia	o__Clostridiales	f__Clostridiaceae	g__Clostridium_sensu_stricto_12	s__Clostridium_carboxidivorans_P7	OTU888	1	5	1	0	0	0	0	0	0	0	7
d__Bacteria	k__norank_d__Bacteria	p__Proteobacteria	c__Alphaproteobacteria	o__Rickettsiales	f__Rickettsiaceae	g__Candidatus_Megaira	s__uncultured_bacterium_g__Candidatus_Megaira	OTU268	0	0	1	0	1	0	2	0	0	1	5
d__Bacteria	k__norank_d__Bacteria	p__Actinobacteriota	c__Actinobacteria	o__Micromonosporales	f__Micromonosporaceae	g__unclassified_f__Micromonosporaceae	s__unclassified_f__Micromonosporaceae	OTU1169	0	1	0	1	0	1	0	0	0	1	4
d__Bacteria	k__norank_d__Bacteria	p__Chloroflexi	c__Anaerolineae	o__Anaerolineales	f__Anaerolineaceae	g__Pelolinea	s__uncultured_bacterium_g__Pelolinea	OTU762	0	1	0	1	0	0	1	0	0	0	3
d__Bacteria	k__norank_d__Bacteria	p__Bacteroidota	c__Bacteroidia	o__Chitinophagales	f__Chitinophagaceae	g__unclassified_f__Chitinophagaceae	s__unclassified_f__Chitinophagaceae	OTU430	15	0	0	0	0	0	2	0	0	0	17
d__Bacteria	k__norank_d__Bacteria	p__Patescibacteria	c__Parcubacteria	o__norank_c__Parcubacteria	f__norank_o__norank_c__Parcubacteria	g__norank_f__norank_o__norank_c__Parcubacteria	s__uncultured_bacterium_g__norank_f__norank_o__norank_c__Parcubacteria	OTU943	0	1	0	0	0	0	0	0	0	2	3
d__Bacteria	k__norank_d__Bacteria	p__WS2	c__norank_p__WS2	o__norank_c__norank_p__WS2	f__norank_o__norank_c__norank_p__WS2	g__norank_f__norank_o__norank_c__norank_p__WS2	s__unclassified_g__norank_f__norank_o__norank_c__norank_p__WS2	OTU809	1	1	0	0	0	0	0	1	0	1	4
d__Bacteria	k__norank_d__Bacteria	p__Proteobacteria	c__Gammaproteobacteria	o__unclassified_c__Gammaproteobacteria	f__unclassified_c__Gammaproteobacteria	g__unclassified_c__Gammaproteobacteria	s__unclassified_c__Gammaproteobacteria	OTU236	0	0	1	0	0	0	0	0	0	0	1
d__Bacteria	k__norank_d__Bacteria	p__Acidobacteriota	c__Thermoanaerobaculia	o__Thermoanaerobaculales	f__Thermoanaerobaculaceae	g__Subgroup_10	s__uncultured_prokaryote_g__Subgroup_10	OTU36	1	3	5	2	1	0	0	0	1	0	13
d__Bacteria	k__norank_d__Bacteria	p__Firmicutes	c__Clostridia	o__Peptostreptococcales-Tissierellales	f__Peptostreptococcaceae	g__Romboutsia	s__uncultured_bacterium_g__Romboutsia	OTU882	7	27	11	26	1	6	8	9	15	6	116
d__Bacteria	k__norank_d__Bacteria	p__Patescibacteria	c__Saccharimonadia	o__Saccharimonadales	f__LWQ8	g__norank_f__LWQ8	s__uncultured_bacterium_g__norank_f__LWQ8	OTU620	0	0	0	0	0	2	0	0	0	0	2
d__Bacteria	k__norank_d__Bacteria	p__Firmicutes	c__Desulfitobacteriia	o__Desulfitobacteriales	f__norank_o__Desulfitobacteriales	g__TC1	s__unclassified_g__TC1	OTU840	0	5	0	0	0	0	1	0	0	2	8
d__Bacteria	k__norank_d__Bacteria	p__Gemmatimonadota	c__Gemmatimonadetes	o__Gemmatimonadales	f__Gemmatimonadaceae	g__norank_f__Gemmatimonadaceae	s__unclassified_g__norank_f__Gemmatimonadaceae	OTU250	1	0	1	0	0	0	1	0	0	1	4
d__Bacteria	k__norank_d__Bacteria	p__Patescibacteria	c__Saccharimonadia	o__Saccharimonadales	f__LWQ8	g__norank_f__LWQ8	s__uncultured_bacterium_g__norank_f__LWQ8	OTU540	49	28	0	0	22	2	13	4	0	3	121
d__Bacteria	k__norank_d__Bacteria	p__Cyanobacteria	c__Cyanobacteriia	o__Chloroplast	f__norank_o__Chloroplast	g__norank_f__norank_o__Chloroplast	s__Nephroselmis_olivacea_g__norank_f__norank	OTU145	0	2	0	0	0	0	0	0	0	0	2
d__Bacteria	k__norank_d__Bacteria	p__Firmicutes	c__Bacilli	o__Lactobacillales	f__Vagococcaceae	g__Vagococcus	s__unclassified_g__Vagococcus	OTU1133	0	29	2	1	1	0	0	0	0	4	37
d__Bacteria	k__norank_d__Bacteria	p__Deinococcota	c__Deinococci	o__Deinococcales	f__Trueperaceae	g__Truepera	s__uncultured_bacterium_g__Truepera	OTU378	0	0	0	0	0	0	0	1	0	1	2
d__Bacteria	k__norank_d__Bacteria	p__Chloroflexi	c__Anaerolineae	o__Caldilineales	f__Caldilineaceae	g__norank_f__Caldilineaceae	s__unclassified_g__norank_f__Caldilineaceae	OTU1110	0	0	0	0	0	0	0	0	0	1	1
d__Bacteria	k__norank_d__Bacteria	p__Bacteroidota	c__Ignavibacteria	o__Ignavibacteriales	f__PHOS-HE36	g__norank_f__PHOS-HE36	s__uncultured_bacterium_g__norank_f__PHOS-HE36	OTU687	0	0	1	0	0	2	0	2	0	0	5
d__Bacteria	k__norank_d__Bacteria	p__Desulfobacterota	c__norank_p__Desulfobacterota	o__norank_c__norank_p__Desulfobacterota	f__norank_o__norank_c__norank_p__Desulfobacterota	g__norank_f__norank_o__norank_c__norank_p__Desulfobacterota	s__unclassified_g__norank_f__norank_o__norank_c__norank_p__Desulfobacterota	OTU373	0	0	0	0	0	0	1	0	0	0	1
d__Bacteria	k__norank_d__Bacteria	p__Patescibacteria	c__CPR2	o__norank_c__CPR2	f__norank_o__norank_c__CPR2	g__norank_f__norank_o__norank_c__CPR2	s__unclassified_g__norank_f__norank_o__norank_c__CPR2	OTU777	0	0	0	1	0	0	0	1	0	0	2
d__Bacteria	k__norank_d__Bacteria	p__Bdellovibrionota	c__Bdellovibrionia	o__Bdellovibrionales	f__Bdellovibrionaceae	g__OM27_clade	s__uncultured_bacterium_g__OM27_clade	OTU264	0	0	1	0	0	0	0	0	1	0	2
d__Bacteria	k__norank_d__Bacteria	p__Firmicutes	c__Bacilli	o__Bacillales	f__Planococcaceae	g__Chryseomicrobium	s__uncultured_bacterium_g__Chryseomicrobium	OTU899	0	1	0	0	0	0	0	0	0	0	1
d__Bacteria	k__norank_d__Bacteria	p__Actinobacteriota	c__Thermoleophilia	o__Gaiellales	f__norank_o__Gaiellales	g__norank_f__norank_o__Gaiellales	s__uncultured_prokaryote_g__norank_f__norank_o__Gaiellales	OTU252	2	5	1	1	1	3	2	1	0	0	16
d__Bacteria	k__norank_d__Bacteria	p__Desulfobacterota	c__Desulfovibrionia	o__Desulfovibrionales	f__Desulfomicrobiaceae	g__Desulfomicrobium	s__uncultured_bacterium_g__Desulfomicrobium	OTU637	1	0	0	0	1	3	0	9	0	0	14
d__Bacteria	k__norank_d__Bacteria	p__Firmicutes	c__Clostridia	o__norank_c__Clostridia	f__Hungateiclostridiaceae	g__unclassified_f__Hungateiclostridiaceae	s__unclassified_f__Hungateiclostridiaceae	OTU292	1	0	3	0	0	0	0	0	0	0	4
d__Bacteria	k__norank_d__Bacteria	p__Patescibacteria	c__Saccharimonadia	o__Saccharimonadales	f__norank_o__Saccharimonadales	g__norank_f__norank_o__Saccharimonadales	s__uncultured_bacterium_g__norank_f__norank_o__Saccharimonadales	OTU829	3	1	0	1	0	2	0	5	0	0	12
d__Bacteria	k__norank_d__Bacteria	p__Acidobacteriota	c__Vicinamibacteria	o__Vicinamibacterales	f__Vicinamibacteraceae	g__norank_f__Vicinamibacteraceae	s__unclassified_g__norank_f__Vicinamibacteraceae	OTU773	0	0	1	0	0	0	1	1	0	1	4
d__Bacteria	k__norank_d__Bacteria	p__Chloroflexi	c__Anaerolineae	o__SBR1031	f__A4b	g__norank_f__A4b	s__unclassified_g__norank_f__A4b	OTU341	0	0	0	0	1	1	0	0	0	0	2
d__Bacteria	k__norank_d__Bacteria	p__Chloroflexi	c__Anaerolineae	o__Anaerolineales	f__Anaerolineaceae	g__norank_f__Anaerolineaceae	s__uncultured_Chloroflexi_bacterium_g__norank_f__Anaerolineaceae	OTU1136	2	21	4	2	0	0	4	1	2	1	37
d__Bacteria	k__norank_d__Bacteria	p__Firmicutes	c__Clostridia	o__Lachnospirales	f__Lachnospiraceae	g__Tyzzerella	s__unclassified_g__Tyzzerella	OTU1028	0	8	0	98	0	0	185	0	0	0	291
d__Bacteria	k__norank_d__Bacteria	p__Proteobacteria	c__Gammaproteobacteria	o__SZB30	f__norank_o__SZB30	g__norank_f__norank_o__SZB30	s__uncultured_bacterium_g__norank_f__norank_o__SZB30	OTU934	31	199	93	35	4	15	53	30	109	12	581
d__Bacteria	k__norank_d__Bacteria	p__Firmicutes	c__Bacilli	o__Mycoplasmatales	f__Mycoplasmataceae	g__norank_f__Mycoplasmataceae	s__uncultured_Firmicutes_bacterium_g__norank_f__Mycoplasmataceae	OTU969	78	160	27	9	5	0	127	135	129	231	901
d__Bacteria	k__norank_d__Bacteria	p__Acidobacteriota	c__Vicinamibacteria	o__Vicinamibacterales	f__norank_o__Vicinamibacterales	g__norank_f__norank_o__Vicinamibacterales	s__uncultured_prokaryote_g__norank_f__norank_o__Vicinamibacterales	OTU93	25	25	25	7	1	11	7	9	4	2	116
d__Bacteria	k__norank_d__Bacteria	p__Cyanobacteria	c__Cyanobacteriia	o__Cyanobacteriales	f__Phormidiaceae	g__Planktothrix_NIVA-CYA_15	s__bacterium_enrichment_culture_clone_B1252011	OTU610	4	15	0	7	0	0	0	11	0	0	37
d__Bacteria	k__norank_d__Bacteria	p__Proteobacteria	c__Alphaproteobacteria	o__Rhizobiales	f__Rhizobiaceae	g__norank_f__Rhizobiaceae	s__metagenome_g__norank_f__Rhizobiaceae	OTU1111	1	11	2	1	0	1	0	3	1	3	23
d__Bacteria	k__norank_d__Bacteria	p__Bacteroidota	c__Bacteroidia	o__Flavobacteriales	f__unclassified_o__Flavobacteriales	g__unclassified_o__Flavobacteriales	s__unclassified_o__Flavobacteriales	OTU427	6	0	0	0	0	0	0	0	0	4	10
d__Bacteria	k__norank_d__Bacteria	p__Patescibacteria	c__Saccharimonadia	o__Saccharimonadales	f__unclassified_o__Saccharimonadales	g__unclassified_o__Saccharimonadales	s__unclassified_o__Saccharimonadales	OTU89	2	5	3	0	0	1	3	0	12	6	32
d__Bacteria	k__norank_d__Bacteria	p__Verrucomicrobiota	c__Verrucomicrobiae	o__Verrucomicrobiales	f__Rubritaleaceae	g__unclassified_f__Rubritaleaceae	s__unclassified_f__Rubritaleaceae	OTU243	0	0	1	0	0	0	0	0	0	0	1
d__Bacteria	k__norank_d__Bacteria	p__Patescibacteria	c__Saccharimonadia	o__Saccharimonadales	f__unclassified_o__Saccharimonadales	g__unclassified_o__Saccharimonadales	s__unclassified_o__Saccharimonadales	OTU548	9	1	4	3	8	3	19	41	22	3	113
d__Bacteria	k__norank_d__Bacteria	p__Proteobacteria	c__Gammaproteobacteria	o__Xanthomonadales	f__Xanthomonadaceae	g__Thermomonas	s__uncultured_bacterium_g__Thermomonas	OTU807	0	1	0	0	0	0	0	3	0	5	9
d__Bacteria	k__norank_d__Bacteria	p__Proteobacteria	c__Gammaproteobacteria	o__Burkholderiales	f__SC-I-84	g__norank_f__SC-I-84	s__unclassified_g__norank_f__SC-I-84	OTU1003	0	0	2	0	1	0	0	2	2	0	7
d__Bacteria	k__norank_d__Bacteria	p__Firmicutes	c__Clostridia	o__Peptostreptococcales-Tissierellales	f__Peptostreptococcaceae	g__Proteocatella	s__uncultured_bacterium_g__Proteocatella	OTU113	1	22	0	0	0	7	1	0	0	1	32
d__Bacteria	k__norank_d__Bacteria	p__Proteobacteria	c__Alphaproteobacteria	o__Rhizobiales	f__Beijerinckiaceae	g__Methylobacterium-Methylorubrum	s__Methylobacterium_brachiatum	OTU1038	0	1	0	0	0	0	0	0	0	0	1
d__Bacteria	k__norank_d__Bacteria	p__Proteobacteria	c__Gammaproteobacteria	o__Methylococcales	f__Methylomonadaceae	g__Crenothrix	s__uncultured_bacterium_g__Crenothrix	OTU245	2	7	10	3	0	1	5	4	6	1	39
d__Bacteria	k__norank_d__Bacteria	p__Patescibacteria	c__Saccharimonadia	o__Saccharimonadales	f__norank_o__Saccharimonadales	g__norank_f__norank_o__Saccharimonadales	s__unclassified_g__norank_f__norank_o__Saccharimonadales	OTU909	2	0	0	0	0	0	0	0	0	0	2
d__Bacteria	k__norank_d__Bacteria	p__Proteobacteria	c__Gammaproteobacteria	o__Coxiellales	f__Coxiellaceae	g__Coxiella	s__bacterium_enrichment_culture_clone_B2042011	OTU625	4	4	0	1	0	2	1	1	4	1	18
d__Bacteria	k__norank_d__Bacteria	p__Cyanobacteria	c__Cyanobacteriia	o__Chloroplast	f__norank_o__Chloroplast	g__norank_f__norank_o__Chloroplast	s__Trachydiscus_minutus	OTU749	13	30	6	6	7	5	26	15	4	8	120
d__Bacteria	k__norank_d__Bacteria	p__Actinobacteriota	c__Actinobacteria	o__Propionibacteriales	f__Propionibacteriaceae	g__unclassified_f__Propionibacteriaceae	s__unclassified_f__Propionibacteriaceae	OTU1120	0	0	0	0	0	0	0	0	0	2	2
d__Bacteria	k__norank_d__Bacteria	p__Actinobacteriota	c__Actinobacteria	o__PeM15	f__norank_o__PeM15	g__norank_f__norank_o__PeM15	s__uncultured_soil_bacterium_g__norank_f__norank_o__PeM15	OTU453	14	26	6	17	3	2	10	8	20	1	107
d__Bacteria	k__norank_d__Bacteria	p__Actinobacteriota	c__Coriobacteriia	o__OPB41	f__norank_o__OPB41	g__norank_f__norank_o__OPB41	s__uncultured_Coriobacteriia_bacterium	OTU864	5	11	2	7	0	0	1	1	1	1	29
d__Bacteria	k__norank_d__Bacteria	p__Proteobacteria	c__Alphaproteobacteria	o__unclassified_c__Alphaproteobacteria	f__unclassified_c__Alphaproteobacteria	g__unclassified_c__Alphaproteobacteria	s__unclassified_c__Alphaproteobacteria	OTU605	1	0	0	0	0	0	0	0	0	0	1
d__Bacteria	k__norank_d__Bacteria	p__RCP2-54	c__norank_p__RCP2-54	o__norank_c__norank_p__RCP2-54	f__norank_o__norank_c__norank_p__RCP2-54	g__norank_f__norank_o__norank_c__norank_p__RCP2-54	s__hydrothermal_vent_metagenome_g__norank_f__norank_o__norank_c__norank_p__RCP2-54	OTU558	0	0	0	0	2	0	0	0	0	0	2
d__Bacteria	k__norank_d__Bacteria	p__Proteobacteria	c__Gammaproteobacteria	o__Burkholderiales	f__Comamonadaceae	g__unclassified_f__Comamonadaceae	s__unclassified_f__Comamonadaceae	OTU917	0	1	0	4	0	0	0	8	0	0	13
d__Bacteria	k__norank_d__Bacteria	p__Patescibacteria	c__WWE3	o__norank_c__WWE3	f__norank_o__norank_c__WWE3	g__norank_f__norank_o__norank_c__WWE3	s__unclassified_g__norank_f__norank_o__norank_c__WWE3	OTU1090	0	1	0	0	0	0	0	0	0	0	1
d__Bacteria	k__norank_d__Bacteria	p__Firmicutes	c__Clostridia	o__Clostridia_UCG-014	f__norank_o__Clostridia_UCG-014	g__norank_f__norank_o__Clostridia_UCG-014	s__unclassified_g__norank_f__norank_o__Clostridia_UCG-014	OTU1009	0	0	1	0	0	0	0	0	1	1	3
d__Bacteria	k__norank_d__Bacteria	p__Acidobacteriota	c__Subgroup_21	o__norank_c__Subgroup_21	f__norank_o__norank_c__Subgroup_21	g__norank_f__norank_o__norank_c__Subgroup_21	s__uncultured_bacterium_g__norank_f__norank_o__norank_c__Subgroup_21	OTU231	3	0	1	0	0	1	0	0	0	0	5
d__Bacteria	k__norank_d__Bacteria	p__Actinobacteriota	c__Actinobacteria	o__Propionibacteriales	f__Nocardioidaceae	g__Marmoricola	s__uncultured_bacterium_g__Marmoricola	OTU750	2	3	0	1	1	2	4	1	3	0	17
d__Bacteria	k__norank_d__Bacteria	p__Patescibacteria	c__Gracilibacteria	o__Absconditabacteriales_SR1	f__norank_o__Absconditabacteriales_SR1	g__norank_f__norank_o__Absconditabacteriales_SR1	s__candidate_division_SR1_bacterium_Aalborg_AAW-1	OTU647	0	5	0	0	0	4	0	0	0	0	9
d__Bacteria	k__norank_d__Bacteria	p__Bacteroidota	c__SJA-28	o__norank_c__SJA-28	f__norank_o__norank_c__SJA-28	g__norank_f__norank_o__norank_c__SJA-28	s__uncultured_sludge_bacterium_g__norank_f__norank_o__norank	OTU312	0	0	1	0	0	0	0	1	0	0	2
d__Bacteria	k__norank_d__Bacteria	p__Cyanobacteria	c__Vampirivibrionia	o__Gastranaerophilales	f__norank_o__Gastranaerophilales	g__norank_f__norank_o__Gastranaerophilales	s__uncultured_organism_g__norank_f__norank_o__Gastranaerophilales	OTU88	0	2	0	0	0	0	0	0	0	0	2
d__Bacteria	k__norank_d__Bacteria	p__Acidobacteriota	c__Blastocatellia	o__Blastocatellales	f__Blastocatellaceae	g__Blastocatella	s__uncultured_bacterium_g__Blastocatella	OTU315	1	0	1	0	2	0	0	5	0	2	11
d__Bacteria	k__norank_d__Bacteria	p__Modulibacteria	c__Moduliflexia	o__Moduliflexales	f__Moduliflexaceae	g__norank_f__Moduliflexaceae	s__uncultured_bacterium_g__norank_f__Moduliflexaceae	OTU901	0	0	0	0	0	1	1	0	0	0	2
d__Bacteria	k__norank_d__Bacteria	p__Actinobacteriota	c__Acidimicrobiia	o__Microtrichales	f__Microtrichaceae	g__norank_f__Microtrichaceae	s__unclassified_g__norank_f__Microtrichaceae	OTU71	0	4	0	0	0	0	0	0	0	1	5
d__Bacteria	k__norank_d__Bacteria	p__Firmicutes	c__Bacilli	o__Mycoplasmatales	f__Mycoplasmataceae	g__Candidatus_Bacilloplasma	s__uncultured_bacterium_g__Candidatus_Bacilloplasma	OTU1050	7653	9749	3717	15935	418	470	6374	7156	13754	2203	67429
d__Bacteria	k__norank_d__Bacteria	p__Campilobacterota	c__Campylobacteria	o__Campylobacterales	f__Sulfurovaceae	g__Sulfurovum	s__uncultured_prokaryote_g__Sulfurovum	OTU1008	0	0	4	0	0	0	0	0	3	0	7
d__Bacteria	k__norank_d__Bacteria	p__Patescibacteria	c__Parcubacteria	o__Candidatus_Kaiserbacteria	f__norank_o__Candidatus_Kaiserbacteria	g__norank_f__norank_o__Candidatus_Kaiserbacteria	s__unclassified_g__norank_f__norank_o__Candidatus_Kaiserbacteria	OTU327	0	0	1	0	0	0	0	0	0	0	1
d__Bacteria	k__norank_d__Bacteria	p__Firmicutes	c__Bacilli	o__Erysipelotrichales	f__Erysipelotrichaceae	g__unclassified_f__Erysipelotrichaceae	s__unclassified_f__Erysipelotrichaceae	OTU1076	0	0	0	0	0	0	0	0	2	0	2
d__Bacteria	k__norank_d__Bacteria	p__Cyanobacteria	c__Cyanobacteriia	o__Cyanobacteriales	f__Nostocaceae	g__Nodularia_PCC-9350	s__Anabaenopsis_sp._PCC_9215	OTU295	1	1	1	0	0	0	3	0	0	1	7
d__Bacteria	k__norank_d__Bacteria	p__Chloroflexi	c__Anaerolineae	o__SJA-15	f__norank_o__SJA-15	g__norank_f__norank_o__SJA-15	s__uncultured_bacterium_g__norank_f__norank_o__SJA-15	OTU783	8	26	13	11	0	1	16	8	16	7	106
d__Bacteria	k__norank_d__Bacteria	p__Chloroflexi	c__Anaerolineae	o__Anaerolineales	f__Anaerolineaceae	g__norank_f__Anaerolineaceae	s__unclassified_g__norank_f__Anaerolineaceae	OTU784	1	43	0	6	0	1	13	4	5	0	73
d__Bacteria	k__norank_d__Bacteria	p__Proteobacteria	c__Gammaproteobacteria	o__Coxiellales	f__Coxiellaceae	g__Coxiella	s__unclassified_g__Coxiella	OTU72	0	1	0	0	0	0	0	0	4	0	5
d__Bacteria	k__norank_d__Bacteria	p__Bacteroidota	c__Bacteroidia	o__Chitinophagales	f__Chitinophagaceae	g__unclassified_f__Chitinophagaceae	s__unclassified_f__Chitinophagaceae	OTU816	1	0	0	0	0	3	2	1	1	45	53
d__Bacteria	k__norank_d__Bacteria	p__Acidobacteriota	c__Acidobacteriae	o__Acidobacteriales	f__Acidobacteriaceae_Subgroup_1	g__Granulicella	s__unclassified_g__Granulicella	OTU181	0	0	0	0	0	0	0	0	0	1	1
d__Bacteria	k__norank_d__Bacteria	p__Planctomycetota	c__Planctomycetes	o__Isosphaerales	f__Isosphaeraceae	g__norank_f__Isosphaeraceae	s__unclassified_g__norank_f__Isosphaeraceae	OTU156	0	2	0	0	0	0	0	0	0	0	2
d__Bacteria	k__norank_d__Bacteria	p__Firmicutes	c__Bacilli	o__Mycoplasmatales	f__Mycoplasmataceae	g__Candidatus_Bacilloplasma	s__uncultured_bacterium_g__Candidatus_Bacilloplasma	OTU554	10725	2819	13088	7439	5602	15933	14569	7699	5459	18339	101672
d__Bacteria	k__norank_d__Bacteria	p__Actinobacteriota	c__Actinobacteria	o__Micrococcales	f__Micrococcaceae	g__Glutamicibacter	s__unclassified_g__Glutamicibacter	OTU479	1	1	0	0	1	0	0	0	0	0	3
d__Bacteria	k__norank_d__Bacteria	p__Actinobacteriota	c__Thermoleophilia	o__Solirubrobacterales	f__Solirubrobacteraceae	g__Conexibacter	s__unclassified_g__Conexibacter	OTU95	0	3	0	0	0	0	0	0	0	0	3
d__Bacteria	k__norank_d__Bacteria	p__Firmicutes	c__Clostridia	o__Peptostreptococcales-Tissierellales	f__Acidaminobacteraceae	g__Acidaminobacter	s__uncultured_bacterium_g__Acidaminobacter	OTU1095	4	1	0	0	0	11	1	3	0	2	22
d__Bacteria	k__norank_d__Bacteria	p__Acidobacteriota	c__Thermoanaerobaculia	o__Thermoanaerobaculales	f__Thermoanaerobaculaceae	g__Subgroup_23	s__uncultured_prokaryote_g__Subgroup_23	OTU265	1	2	3	1	0	1	1	0	0	0	9
d__Bacteria	k__norank_d__Bacteria	p__Patescibacteria	c__Microgenomatia	o__Candidatus_Roizmanbacteria	f__norank_o__Candidatus_Roizmanbacteria	g__norank_f__norank_o__Candidatus_Roizmanbacteria	s__Candidatus_Roizmanbacteria_bacterium_RIFOXYD1_FULL_41_24	OTU130	2	5	1	1	1	0	1	0	0	0	11
d__Bacteria	k__norank_d__Bacteria	p__Firmicutes	c__Clostridia	o__Clostridiales	f__Clostridiaceae	g__Clostridium_sensu_stricto_1	s__Clostridium_beijerinckii	OTU897	1	2	0	1	0	0	1	0	1	0	6
d__Bacteria	k__norank_d__Bacteria	p__Proteobacteria	c__Alphaproteobacteria	o__Rhizobiales	f__Beijerinckiaceae	g__Bosea	s__unclassified_g__Bosea	OTU143	0	8	0	0	0	0	0	2	0	0	10
d__Bacteria	k__norank_d__Bacteria	p__Myxococcota	c__Myxococcia	o__Myxococcales	f__Myxococcaceae	g__unclassified_f__Myxococcaceae	s__unclassified_f__Myxococcaceae	OTU114	0	3	0	0	0	0	0	0	0	0	3
d__Bacteria	k__norank_d__Bacteria	p__Firmicutes	c__Bacilli	o__Mycoplasmatales	f__Mycoplasmataceae	g__Candidatus_Bacilloplasma	s__uncultured_Firmicutes_bacterium_g__Candidatus_Bacilloplasma	OTU893	3	0	0	1	0	0	3	0	0	0	7
d__Bacteria	k__norank_d__Bacteria	p__Actinobacteriota	c__Actinobacteria	o__Propionibacteriales	f__Nocardioidaceae	g__Nocardioides	s__unclassified_g__Nocardioides	OTU855	0	0	0	0	0	1	0	0	0	0	1
d__Bacteria	k__norank_d__Bacteria	p__Proteobacteria	c__Gammaproteobacteria	o__Enterobacterales	f__Budviciaceae	g__Pragia	s__bacterium_TSA241-4	OTU1073	282	484	17	884	233	26	390	637	616	60	3629
d__Bacteria	k__norank_d__Bacteria	p__Desulfobacterota	c__Syntrophorhabdia	o__Syntrophorhabdales	f__Syntrophorhabdaceae	g__Syntrophorhabdus	s__uncultured_Syntrophorhabdaceae_bacterium_SHA-207	OTU284	0	0	2	0	0	0	1	0	0	0	3
d__Bacteria	k__norank_d__Bacteria	p__Desulfobacterota	c__Desulfobulbia	o__Desulfobulbales	f__Desulfocapsaceae	g__Desulforhopalus	s__unclassified_g__Desulforhopalus	OTU148	0	2	0	0	0	0	0	0	0	0	2
d__Bacteria	k__norank_d__Bacteria	p__Actinobacteriota	c__Actinobacteria	o__Propionibacteriales	f__Nocardioidaceae	g__Nocardioides	s__unclassified_g__Nocardioides	OTU452	0	0	0	1	0	0	0	0	0	1	2
d__Bacteria	k__norank_d__Bacteria	p__Bacteroidota	c__Bacteroidia	o__Bacteroidales	f__Paludibacteraceae	g__Paludibacter	s__uncultured_bacterium_g__Paludibacter	OTU847	0	0	0	0	0	1	0	0	0	0	1
d__Bacteria	k__norank_d__Bacteria	p__Verrucomicrobiota	c__Verrucomicrobiae	o__Verrucomicrobiales	f__Rubritaleaceae	g__norank_f__Rubritaleaceae	s__uncultured_bacterium_g__norank_f__Rubritaleaceae	OTU226	0	14	2	0	0	1	2	0	3	1	23
d__Bacteria	k__norank_d__Bacteria	p__Patescibacteria	c__Parcubacteria	o__Candidatus_Moranbacteria	f__norank_o__Candidatus_Moranbacteria	g__norank_f__norank_o__Candidatus_Moranbacteria	s__Candidatus_Moranbacteria_bacterium_GW2011_GWE1_49_15	OTU136	2	1	0	2	0	0	0	0	1	0	6
d__Bacteria	k__norank_d__Bacteria	p__Bacteroidota	c__Kapabacteria	o__Kapabacteriales	f__norank_o__Kapabacteriales	g__norank_f__norank_o__Kapabacteriales	s__unclassified_g__norank_f__norank_o__Kapabacteriales	OTU577	2	0	0	0	0	0	0	0	0	1	3
d__Bacteria	k__norank_d__Bacteria	p__Proteobacteria	c__Gammaproteobacteria	o__Enterobacterales	f__Hafniaceae	g__Hafnia-Obesumbacterium	s__Hafnia_paralvei	OTU941	0	0	0	142	0	0	0	0	0	0	142
d__Bacteria	k__norank_d__Bacteria	p__Proteobacteria	c__Gammaproteobacteria	o__Xanthomonadales	f__Xanthomonadaceae	g__Arenimonas	s__unclassified_g__Arenimonas	OTU926	0	3	2	0	0	0	2	0	1	2	10
d__Bacteria	k__norank_d__Bacteria	p__Patescibacteria	c__Berkelbacteria	o__norank_c__Berkelbacteria	f__norank_o__norank_c__Berkelbacteria	g__norank_f__norank_o__norank_c__Berkelbacteria	s__uncultured_Epsilonproteobacteria_bacterium_g__norank_f__norank_o__norank	OTU35	2	1	0	0	0	0	0	0	0	0	3
d__Bacteria	k__norank_d__Bacteria	p__Myxococcota	c__Polyangia	o__Nannocystales	f__Nannocystaceae	g__norank_f__Nannocystaceae	s__metagenome_g__norank_f__Nannocystaceae	OTU739	0	0	0	0	0	0	3	0	0	0	3
d__Bacteria	k__norank_d__Bacteria	p__Chloroflexi	c__KD4-96	o__norank_c__KD4-96	f__norank_o__norank_c__KD4-96	g__norank_f__norank_o__norank_c__KD4-96	s__uncultured_bacterium_g__norank_f__norank_o__norank_c__KD4-96	OTU549	5	40	2	14	1	2	11	2	2	1	80
d__Bacteria	k__norank_d__Bacteria	p__Patescibacteria	c__Saccharimonadia	o__Saccharimonadales	f__LWQ8	g__norank_f__LWQ8	s__uncultured_bacterium_g__norank_f__LWQ8	OTU1155	0	0	0	2	0	0	0	0	0	0	2
d__Bacteria	k__norank_d__Bacteria	p__Acidobacteriota	c__Vicinamibacteria	o__Vicinamibacterales	f__norank_o__Vicinamibacterales	g__norank_f__norank_o__Vicinamibacterales	s__unclassified_g__norank_f__norank_o__Vicinamibacterales	OTU624	0	0	0	0	0	2	0	0	0	0	2
d__Bacteria	k__norank_d__Bacteria	p__Actinobacteriota	c__Thermoleophilia	o__Gaiellales	f__norank_o__Gaiellales	g__norank_f__norank_o__Gaiellales	s__unclassified_g__norank_f__norank_o__Gaiellales	OTU249	15	27	7	2	3	3	11	6	7	3	84
d__Bacteria	k__norank_d__Bacteria	p__Modulibacteria	c__Moduliflexia	o__Moduliflexales	f__Moduliflexaceae	g__norank_f__Moduliflexaceae	s__unclassified_g__norank_f__Moduliflexaceae	OTU1072	0	0	1	0	0	0	0	0	0	0	1
d__Bacteria	k__norank_d__Bacteria	p__Actinobacteriota	c__Thermoleophilia	o__Gaiellales	f__norank_o__Gaiellales	g__norank_f__norank_o__Gaiellales	s__unclassified_g__norank_f__norank_o__Gaiellales	OTU286	1	4	2	0	0	0	1	0	1	0	9
d__Bacteria	k__norank_d__Bacteria	p__Firmicutes	c__Bacilli	o__Erysipelotrichales	f__Erysipelotrichaceae	g__Erysipelothrix	s__metagenome_g__Erysipelothrix	OTU634	0	0	0	0	0	2	0	0	0	0	2
d__Bacteria	k__norank_d__Bacteria	p__Proteobacteria	c__Gammaproteobacteria	o__Chromatiales	f__Chromatiaceae	g__unclassified_f__Chromatiaceae	s__unclassified_f__Chromatiaceae	OTU987	1	11	1	2	0	1	6	2	7	0	31
d__Bacteria	k__norank_d__Bacteria	p__Firmicutes	c__Bacilli	o__Bacillales	f__Bacillaceae	g__Bacillus	s__Bacillus_aquimaris	OTU734	3	0	0	2	0	1	1	0	1	0	8
d__Bacteria	k__norank_d__Bacteria	p__Chloroflexi	c__Anaerolineae	o__RBG-13-54-9	f__norank_o__RBG-13-54-9	g__norank_f__norank_o__RBG-13-54-9	s__metagenome_g__norank_f__norank_o__RBG-13-54-9	OTU450	0	0	0	2	0	0	0	0	0	0	2
d__Bacteria	k__norank_d__Bacteria	p__Cyanobacteria	c__Cyanobacteriia	o__Synechococcales	f__Cyanobiaceae	g__Synechococcus_CC9902	s__unclassified_g__Synechococcus_CC9902	OTU509	0	0	0	0	0	0	0	2	0	2	4
d__Bacteria	k__norank_d__Bacteria	p__Chloroflexi	c__Chloroflexia	o__Chloroflexales	f__Roseiflexaceae	g__norank_f__Roseiflexaceae	s__unclassified_g__norank_f__Roseiflexaceae	OTU386	1	0	0	0	0	0	0	0	0	0	1
d__Bacteria	k__norank_d__Bacteria	p__Proteobacteria	c__Gammaproteobacteria	o__Methylococcales	f__Methylomonadaceae	g__Crenothrix	s__unclassified_g__Crenothrix	OTU769	3	3	0	0	1	1	1	1	0	3	13
d__Bacteria	k__norank_d__Bacteria	p__Proteobacteria	c__Gammaproteobacteria	o__Burkholderiales	f__Rhodocyclaceae	g__norank_f__Rhodocyclaceae	s__uncultured_Rhodocyclaceae_bacterium_g__norank_f__Rhodocyclaceae	OTU1081	0	0	6	0	1	0	1	0	3	4	15
d__Bacteria	k__norank_d__Bacteria	p__Actinobacteriota	c__Thermoleophilia	o__Gaiellales	f__norank_o__Gaiellales	g__norank_f__norank_o__Gaiellales	s__metagenome_g__norank_f__norank_o__Gaiellales	OTU1167	3	0	0	1	0	1	0	0	0	4	9
d__Bacteria	k__norank_d__Bacteria	p__Proteobacteria	c__Gammaproteobacteria	o__Xanthomonadales	f__Xanthomonadaceae	g__Lysobacter	s__unclassified_g__Lysobacter	OTU314	2	0	0	0	2	2	0	2	0	1	9
d__Bacteria	k__norank_d__Bacteria	p__Dependentiae	c__Babeliae	o__Babeliales	f__Vermiphilaceae	g__norank_f__Vermiphilaceae	s__uncultured_bacterium_g__norank_f__Vermiphilaceae	OTU726	1	0	0	0	0	0	0	0	0	1	2
d__Bacteria	k__norank_d__Bacteria	p__Acidobacteriota	c__Vicinamibacteria	o__Subgroup_17	f__norank_o__Subgroup_17	g__norank_f__norank_o__Subgroup_17	s__uncultured_bacterium_g__norank_f__norank_o__Subgroup_17	OTU747	1	0	0	0	0	0	1	0	0	0	2
d__Bacteria	k__norank_d__Bacteria	p__Patescibacteria	c__WWE3	o__norank_c__WWE3	f__norank_o__norank_c__WWE3	g__norank_f__norank_o__norank_c__WWE3	s__unclassified_g__norank_f__norank_o__norank_c__WWE3	OTU1012	0	0	0	0	0	0	0	0	2	0	2
d__Bacteria	k__norank_d__Bacteria	p__Verrucomicrobiota	c__Verrucomicrobiae	o__Verrucomicrobiales	f__Rubritaleaceae	g__Luteolibacter	s__uncultured_bacterium_g__Luteolibacter	OTU859	1	0	0	0	0	0	0	0	0	0	1
d__Bacteria	k__norank_d__Bacteria	p__Chloroflexi	c__Anaerolineae	o__Anaerolineales	f__Anaerolineaceae	g__norank_f__Anaerolineaceae	s__uncultured_Chloroflexi_bacterium_g__norank_f__Anaerolineaceae	OTU438	1	14	3	9	2	1	3	3	3	1	40
d__Bacteria	k__norank_d__Bacteria	p__Patescibacteria	c__Saccharimonadia	o__Saccharimonadales	f__norank_o__Saccharimonadales	g__norank_f__norank_o__Saccharimonadales	s__metagenome_g__norank_f__norank_o__Saccharimonadales	OTU1146	104	36	32	8	26	16	5	11	66	57	361
d__Bacteria	k__norank_d__Bacteria	p__Chloroflexi	c__Anaerolineae	o__Caldilineales	f__Caldilineaceae	g__norank_f__Caldilineaceae	s__uncultured_bacterium_g__norank_f__Caldilineaceae	OTU1123	1	5	1	6	0	1	5	2	6	1	28
d__Bacteria	k__norank_d__Bacteria	p__Patescibacteria	c__Parcubacteria	o__Candidatus_Moranbacteria	f__norank_o__Candidatus_Moranbacteria	g__norank_f__norank_o__Candidatus_Moranbacteria	s__uncultured_soil_bacterium_g__norank_f__norank_o__Candidatus_Moranbacteria	OTU255	0	0	3	1	0	0	0	0	1	0	5
d__Bacteria	k__norank_d__Bacteria	p__Chloroflexi	c__Anaerolineae	o__Caldilineales	f__Caldilineaceae	g__norank_f__Caldilineaceae	s__uncultured_bacterium_g__norank_f__Caldilineaceae	OTU1125	0	0	0	0	6	0	0	3	0	6	15
d__Bacteria	k__norank_d__Bacteria	p__Proteobacteria	c__Alphaproteobacteria	o__Rhizobiales	f__Hyphomicrobiaceae	g__norank_f__Hyphomicrobiaceae	s__metagenome_g__norank_f__Hyphomicrobiaceae	OTU1004	0	1	1	0	0	1	0	0	1	0	4
d__Bacteria	k__norank_d__Bacteria	p__Cyanobacteria	c__Cyanobacteriia	o__Chloroplast	f__norank_o__Chloroplast	g__norank_f__norank_o__Chloroplast	s__unclassified_g__norank_f__norank_o__Chloroplast	OTU62	2	7	1	7	0	0	6	1	0	5	29
d__Bacteria	k__norank_d__Bacteria	p__Chloroflexi	c__Chloroflexia	o__Chloroflexales	f__Chloroflexaceae	g__Chloronema	s__uncultured_bacterium_g__Chloronema	OTU1053	0	0	0	2	0	0	0	0	0	0	2
d__Bacteria	k__norank_d__Bacteria	p__Actinobacteriota	c__Actinobacteria	o__Propionibacteriales	f__Nocardioidaceae	g__Nocardioides	s__Nocardioides_sp._g__Nocardioides	OTU920	17	1	4	2	0	0	1	4	0	1	30
d__Bacteria	k__norank_d__Bacteria	p__Firmicutes	c__Bacilli	o__Mycoplasmatales	f__Mycoplasmataceae	g__norank_f__Mycoplasmataceae	s__uncultured_Firmicutes_bacterium_g__norank_f__Mycoplasmataceae	OTU67	34	469	214	19	37	0	189	766	358	719	2805
d__Bacteria	k__norank_d__Bacteria	p__Cyanobacteria	c__Cyanobacteriia	o__Chloroplast	f__norank_o__Chloroplast	g__norank_f__norank_o__Chloroplast	s__Nannochloropsis_gaditana_g__norank	OTU1109	30	75	12	22	5	5	23	22	6	10	210
d__Bacteria	k__norank_d__Bacteria	p__Actinobacteriota	c__Thermoleophilia	o__Solirubrobacterales	f__67-14	g__norank_f__67-14	s__unclassified_g__norank_f__67-14	OTU928	5	1	1	3	1	0	0	3	9	1	24
d__Bacteria	k__norank_d__Bacteria	p__Firmicutes	c__Bacilli	o__Erysipelotrichales	f__Erysipelatoclostridiaceae	g__Coprobacillus	s__uncultured_bacterium_g__Coprobacillus	OTU886	120	66	184	149	216	207	901	127	66	300	2336
d__Bacteria	k__norank_d__Bacteria	p__Proteobacteria	c__Alphaproteobacteria	o__Sphingomonadales	f__Sphingomonadaceae	g__unclassified_f__Sphingomonadaceae	s__unclassified_f__Sphingomonadaceae	OTU600	22	4	0	0	4	0	8	2	1	18	59
d__Bacteria	k__norank_d__Bacteria	p__Firmicutes	c__Bacilli	o__Erysipelotrichales	f__Erysipelotrichaceae	g__Erysipelothrix	s__uncultured_low_GC_Gram-positive_bacterium_g__Erysipelothrix	OTU632	0	0	0	0	0	3	0	0	0	1	4
d__Bacteria	k__norank_d__Bacteria	p__Chloroflexi	c__JG30-KF-CM66	o__norank_c__JG30-KF-CM66	f__norank_o__norank_c__JG30-KF-CM66	g__norank_f__norank_o__norank_c__JG30-KF-CM66	s__unclassified_g__norank_f__norank_o__norank_c__JG30-KF-CM66	OTU353	0	0	0	0	0	0	0	0	0	1	1
d__Bacteria	k__norank_d__Bacteria	p__Dependentiae	c__Babeliae	o__Babeliales	f__norank_o__Babeliales	g__norank_f__norank_o__Babeliales	s__uncultured_bacterium_g__norank_f__norank_o__Babeliales	OTU985	1	4	1	1	1	0	0	0	4	0	12
d__Bacteria	k__norank_d__Bacteria	p__Actinobacteriota	c__MB-A2-108	o__norank_c__MB-A2-108	f__norank_o__norank_c__MB-A2-108	g__norank_f__norank_o__norank_c__MB-A2-108	s__unclassified_g__norank_f__norank_o__norank_c__MB-A2-108	OTU1117	0	0	0	0	0	0	0	0	0	2	2
d__Bacteria	k__norank_d__Bacteria	p__Actinobacteriota	c__Actinobacteria	o__Propionibacteriales	f__Propionibacteriaceae	g__Propioniciclava	s__unclassified_g__Propioniciclava	OTU780	0	0	0	0	0	0	5	3	0	0	8
d__Bacteria	k__norank_d__Bacteria	p__Patescibacteria	c__WWE3	o__norank_c__WWE3	f__norank_o__norank_c__WWE3	g__norank_f__norank_o__norank_c__WWE3	s__unclassified_g__norank_f__norank_o__norank_c__WWE3	OTU628	1	0	1	0	0	1	1	0	0	0	4
d__Bacteria	k__norank_d__Bacteria	p__Patescibacteria	c__Parcubacteria	o__Candidatus_Kaiserbacteria	f__norank_o__Candidatus_Kaiserbacteria	g__norank_f__norank_o__Candidatus_Kaiserbacteria	s__uncultured_organism_g__norank_f__norank_o__Candidatus_Kaiserbacteria	OTU173	0	0	0	0	0	0	1	0	0	0	1
d__Bacteria	k__norank_d__Bacteria	p__Actinobacteriota	c__MB-A2-108	o__norank_c__MB-A2-108	f__norank_o__norank_c__MB-A2-108	g__norank_f__norank_o__norank_c__MB-A2-108	s__Actinobacteria_bacterium_RBG_19FT_COMBO_70_19	OTU616	0	3	0	0	0	1	2	0	0	0	6
d__Bacteria	k__norank_d__Bacteria	p__Bacteroidota	c__Bacteroidia	o__Chitinophagales	f__Saprospiraceae	g__norank_f__Saprospiraceae	s__uncultured_bacterium_g__norank_f__Saprospiraceae	OTU363	0	0	0	0	0	1	0	0	0	1	2
d__Bacteria	k__norank_d__Bacteria	p__Chloroflexi	c__Chloroflexia	o__Chloroflexales	f__Herpetosiphonaceae	g__Herpetosiphon	s__unclassified_g__Herpetosiphon	OTU808	0	0	0	0	0	0	0	1	0	0	1
d__Bacteria	k__norank_d__Bacteria	p__Patescibacteria	c__Saccharimonadia	o__Saccharimonadales	f__Saccharimonadaceae	g__TM7a	s__uncultured_bacterium_g__TM7a	OTU568	5	0	0	0	1	0	3	0	0	1	10
d__Bacteria	k__norank_d__Bacteria	p__Proteobacteria	c__Gammaproteobacteria	o__Alteromonadales	f__Shewanellaceae	g__Shewanella	s__Shewanella_bicestrii	OTU849	0	0	1	1	1	0	0	0	0	4	7
d__Bacteria	k__norank_d__Bacteria	p__Cyanobacteria	c__Cyanobacteriia	o__Chloroplast	f__norank_o__Chloroplast	g__norank_f__norank_o__Chloroplast	s__unclassified_g__norank_f__norank_o__Chloroplast	OTU506	1	1	0	0	0	0	0	0	0	0	2
d__Bacteria	k__norank_d__Bacteria	p__Verrucomicrobiota	c__Verrucomicrobiae	o__Verrucomicrobiales	f__Rubritaleaceae	g__Luteolibacter	s__unclassified_g__Luteolibacter	OTU640	0	1	1	2	1	2	0	0	0	1	8
d__Bacteria	k__norank_d__Bacteria	p__Bacteroidota	c__Bacteroidia	o__Chitinophagales	f__Saprospiraceae	g__norank_f__Saprospiraceae	s__uncultured_bacterium_g__norank_f__Saprospiraceae	OTU561	0	0	0	0	1	0	0	0	0	0	1
d__Bacteria	k__norank_d__Bacteria	p__Chloroflexi	c__Anaerolineae	o__Caldilineales	f__Caldilineaceae	g__norank_f__Caldilineaceae	s__uncultured_Chloroflexi_bacterium_g__norank_f__Caldilineaceae	OTU75	0	5	0	1	0	0	0	0	0	0	6
d__Bacteria	k__norank_d__Bacteria	p__Cyanobacteria	c__Cyanobacteriia	o__Chloroplast	f__norank_o__Chloroplast	g__norank_f__norank_o__Chloroplast	s__Oscillatoriales_cyanobacterium_HF1	OTU63	0	0	3	0	1	0	2	0	0	0	6
d__Bacteria	k__norank_d__Bacteria	p__Proteobacteria	c__Alphaproteobacteria	o__Rhizobiales	f__Hyphomicrobiaceae	g__Hyphomicrobium	s__unclassified_g__Hyphomicrobium	OTU875	2	0	1	1	0	0	0	0	0	0	4
d__Bacteria	k__norank_d__Bacteria	p__Bacteroidota	c__Bacteroidia	o__Bacteroidales	f__Bacteroidetes_vadinHA17	g__norank_f__Bacteroidetes_vadinHA17	s__unclassified_g__norank_f__Bacteroidetes_vadinHA17	OTU630	0	0	0	0	0	1	0	0	0	0	1
d__Bacteria	k__norank_d__Bacteria	p__Actinobacteriota	c__Coriobacteriia	o__OPB41	f__norank_o__OPB41	g__norank_f__norank_o__OPB41	s__uncultured_bacterium_g__norank_f__norank_o__OPB41	OTU98	5	7	2	8	0	1	7	4	2	0	36
d__Bacteria	k__norank_d__Bacteria	p__Proteobacteria	c__Gammaproteobacteria	o__Burkholderiales	f__SC-I-84	g__norank_f__SC-I-84	s__uncultured_bacterium_g__norank_f__SC-I-84	OTU51	1	0	1	0	0	0	0	0	0	0	2
d__Bacteria	k__norank_d__Bacteria	p__Acidobacteriota	c__Holophagae	o__Holophagales	f__Holophagaceae	g__Geothrix	s__uncultured_bacterium_g__Geothrix	OTU805	0	0	0	0	0	0	0	1	0	1	2
d__Bacteria	k__norank_d__Bacteria	p__Patescibacteria	c__WWE3	o__norank_c__WWE3	f__norank_o__norank_c__WWE3	g__norank_f__norank_o__norank_c__WWE3	s__unclassified_g__norank_f__norank_o__norank_c__WWE3	OTU451	3	2	0	2	0	0	0	0	0	0	7
d__Bacteria	k__norank_d__Bacteria	p__Actinobacteriota	c__Thermoleophilia	o__Gaiellales	f__norank_o__Gaiellales	g__norank_f__norank_o__Gaiellales	s__metagenome_g__norank_f__norank_o__Gaiellales	OTU276	1	1	1	0	0	0	0	0	0	0	3
d__Bacteria	k__norank_d__Bacteria	p__Firmicutes	c__Clostridia	o__norank_c__Clostridia	f__Hungateiclostridiaceae	g__unclassified_f__Hungateiclostridiaceae	s__unclassified_f__Hungateiclostridiaceae	OTU1165	0	1	1	0	0	0	1	0	0	0	3
d__Bacteria	k__norank_d__Bacteria	p__Proteobacteria	c__Alphaproteobacteria	o__Alphaproteobacteria_Incertae_Sedis	f__unclassified_o__Alphaproteobacteria_Incertae_Sedis	g__Neomegalonema	s__unclassified_g__Neomegalonema	OTU282	1	0	1	0	0	0	0	0	0	0	2
d__Bacteria	k__norank_d__Bacteria	p__Proteobacteria	c__Alphaproteobacteria	o__Rhodospirillales	f__Rhodospirillaceae	g__norank_f__Rhodospirillaceae	s__metagenome_g__norank_f__Rhodospirillaceae	OTU1103	0	0	0	0	0	0	0	0	0	3	3
d__Bacteria	k__norank_d__Bacteria	p__Chloroflexi	c__Chloroflexia	o__Chloroflexales	f__Roseiflexaceae	g__Kouleothrix	s__uncultured_bacterium_g__Kouleothrix	OTU1108	0	0	0	0	5	0	0	2	0	8	15
d__Bacteria	k__norank_d__Bacteria	p__Proteobacteria	c__Alphaproteobacteria	o__Rhodobacterales	f__Rhodobacteraceae	g__unclassified_f__Rhodobacteraceae	s__unclassified_f__Rhodobacteraceae	OTU967	75	45	9	6	7	0	9	24	10	16	201
d__Bacteria	k__norank_d__Bacteria	p__Patescibacteria	c__Saccharimonadia	o__Saccharimonadales	f__norank_o__Saccharimonadales	g__norank_f__norank_o__Saccharimonadales	s__uncultured_Candidatus_Saccharibacteria_bacterium_g__norank_f__norank	OTU708	2	0	82	21	0	12	0	0	2	0	119
d__Bacteria	k__norank_d__Bacteria	p__Chloroflexi	c__Anaerolineae	o__unclassified_c__Anaerolineae	f__unclassified_c__Anaerolineae	g__unclassified_c__Anaerolineae	s__unclassified_c__Anaerolineae	OTU1087	0	3	0	1	1	1	0	0	0	0	6
d__Bacteria	k__norank_d__Bacteria	p__Proteobacteria	c__Gammaproteobacteria	o__Pseudomonadales	f__Moraxellaceae	g__Acinetobacter	s__unclassified_g__Acinetobacter	OTU939	0	0	0	0	3	0	0	0	0	0	3
d__Bacteria	k__norank_d__Bacteria	p__Proteobacteria	c__Gammaproteobacteria	o__Methylococcales	f__Methylomonadaceae	g__unclassified_f__Methylomonadaceae	s__unclassified_f__Methylomonadaceae	OTU931	2	0	2	0	0	0	1	0	1	0	6
d__Bacteria	k__norank_d__Bacteria	p__Chloroflexi	c__Anaerolineae	o__Anaerolineales	f__Anaerolineaceae	g__norank_f__Anaerolineaceae	s__uncultured_Chloroflexi_bacterium_g__norank_f__Anaerolineaceae	OTU756	0	0	0	3	1	2	3	1	0	1	11
d__Bacteria	k__norank_d__Bacteria	p__Chloroflexi	c__Anaerolineae	o__Anaerolineales	f__Anaerolineaceae	g__norank_f__Anaerolineaceae	s__uncultured_Anaerolineaceae_bacterium_g__norank_f__Anaerolineaceae	OTU596	5	33	2	4	0	2	4	2	0	1	53
d__Bacteria	k__norank_d__Bacteria	p__Firmicutes	c__Bacilli	o__Erysipelotrichales	f__unclassified_o__Erysipelotrichales	g__unclassified_o__Erysipelotrichales	s__unclassified_o__Erysipelotrichales	OTU1019	0	0	0	0	0	0	1	0	1	0	2
d__Bacteria	k__norank_d__Bacteria	p__Cyanobacteria	c__Cyanobacteriia	o__Chloroplast	f__norank_o__Chloroplast	g__norank_f__norank_o__Chloroplast	s__uncultured_bacterium_g__norank_f__norank_o__Chloroplast	OTU631	3	3	0	1	0	1	2	1	1	1	13
d__Bacteria	k__norank_d__Bacteria	p__Firmicutes	c__Clostridia	o__Clostridiales	f__Clostridiaceae	g__Clostridium_sensu_stricto_6	s__Clostridium_bornimense	OTU5	4	0	0	1	0	0	0	0	1	0	6
d__Bacteria	k__norank_d__Bacteria	p__Dependentiae	c__Babeliae	o__Babeliales	f__unclassified_o__Babeliales	g__unclassified_o__Babeliales	s__unclassified_o__Babeliales	OTU311	0	0	0	0	0	0	0	1	0	0	1
d__Bacteria	k__norank_d__Bacteria	p__Firmicutes	c__Clostridia	o__Peptostreptococcales-Tissierellales	f__Anaerovoracaceae	g__Anaerovorax	s__unclassified_g__Anaerovorax	OTU958	0	0	0	0	0	1	0	0	0	0	1
d__Bacteria	k__norank_d__Bacteria	p__Proteobacteria	c__Alphaproteobacteria	o__Rhizobiales	f__Rhizobiales_Incertae_Sedis	g__Phreatobacter	s__unclassified_g__Phreatobacter	OTU78	1	2	1	0	0	0	0	1	1	0	6
d__Bacteria	k__norank_d__Bacteria	p__Proteobacteria	c__Gammaproteobacteria	o__Burkholderiales	f__Burkholderiaceae	g__Polynucleobacter	s__Polynucleobacter_cosmopolitanus	OTU1132	0	0	0	0	0	0	0	0	0	2	2
d__Bacteria	k__norank_d__Bacteria	p__Fusobacteriota	c__Fusobacteriia	o__Fusobacteriales	f__Leptotrichiaceae	g__unclassified_f__Leptotrichiaceae	s__unclassified_f__Leptotrichiaceae	OTU83	23	30	0	2	11	3	3	2	0	2	76
d__Bacteria	k__norank_d__Bacteria	p__Firmicutes	c__Clostridia	o__Peptostreptococcales-Tissierellales	f__Anaerovoracaceae	g__Eubacterium_brachy_group	s__uncultured_bacterium_g__Eubacterium_brachy_group	OTU199	2	21	1840	40	261	476	125	58	42	17	2882
d__Bacteria	k__norank_d__Bacteria	p__Acidobacteriota	c__Blastocatellia	o__Blastocatellales	f__Blastocatellaceae	g__norank_f__Blastocatellaceae	s__uncultured_bacterium_g__norank_f__Blastocatellaceae	OTU229	1	0	1	0	1	0	0	1	0	1	5
d__Bacteria	k__norank_d__Bacteria	p__Firmicutes	c__Bacilli	o__Bacillales	f__Planococcaceae	g__Lysinibacillus	s__unclassified_g__Lysinibacillus	OTU183	1	1	0	0	0	0	0	0	0	0	2
d__Bacteria	k__norank_d__Bacteria	p__Firmicutes	c__Bacilli	o__Mycoplasmatales	f__Mycoplasmataceae	g__norank_f__Mycoplasmataceae	s__uncultured_Firmicutes_bacterium_g__norank_f__Mycoplasmataceae	OTU1163	807	321	108	293	132	0	206	146	1532	1237	4782
d__Bacteria	k__norank_d__Bacteria	p__Actinobacteriota	c__Acidimicrobiia	o__unclassified_c__Acidimicrobiia	f__unclassified_c__Acidimicrobiia	g__unclassified_c__Acidimicrobiia	s__unclassified_c__Acidimicrobiia	OTU601	1	0	0	1	0	0	0	0	0	0	2
d__Bacteria	k__norank_d__Bacteria	p__Proteobacteria	c__Gammaproteobacteria	o__Legionellales	f__Legionellaceae	g__Legionella	s__uncultured_bacterium_g__Legionella	OTU684	0	1	0	0	1	0	0	2	0	0	4
d__Bacteria	k__norank_d__Bacteria	p__Acidobacteriota	c__Vicinamibacteria	o__Subgroup_17	f__norank_o__Subgroup_17	g__norank_f__norank_o__Subgroup_17	s__uncultured_soil_bacterium_g__norank_f__norank_o__Subgroup_17	OTU31	1	5	0	0	0	0	0	3	1	3	13
d__Bacteria	k__norank_d__Bacteria	p__Firmicutes	c__Bacilli	o__Mycoplasmatales	f__Mycoplasmataceae	g__Candidatus_Bacilloplasma	s__uncultured_bacterium_g__Candidatus_Bacilloplasma	OTU510	174	1326	2657	3323	704	15984	1461	351	514	1121	27615
d__Bacteria	k__norank_d__Bacteria	p__Bacteroidota	c__Bacteroidia	o__Chitinophagales	f__norank_o__Chitinophagales	g__norank_f__norank_o__Chitinophagales	s__uncultured_Cytophagales_bacterium_g__norank_f__norank	OTU536	1	0	0	0	0	0	0	0	0	0	1
d__Bacteria	k__norank_d__Bacteria	p__Chloroflexi	c__Anaerolineae	o__Anaerolineales	f__Anaerolineaceae	g__norank_f__Anaerolineaceae	s__unclassified_g__norank_f__Anaerolineaceae	OTU1097	0	4	0	0	0	0	1	0	0	1	6
d__Bacteria	k__norank_d__Bacteria	p__Chloroflexi	c__Anaerolineae	o__SBR1031	f__A4b	g__norank_f__A4b	s__uncultured_bacterium_g__norank_f__A4b	OTU1126	3	2	0	0	0	1	0	1	0	7	14
d__Bacteria	k__norank_d__Bacteria	p__Actinobacteriota	c__Thermoleophilia	o__Gaiellales	f__norank_o__Gaiellales	g__norank_f__norank_o__Gaiellales	s__metagenome_g__norank_f__norank_o__Gaiellales	OTU929	2	2	0	0	0	0	0	0	1	0	5
d__Bacteria	k__norank_d__Bacteria	p__Desulfobacterota	c__Desulfobacteria	o__Desulfobacterales	f__Desulfococcaceae	g__Desulfococcus	s__Desulfococcus_biacutus	OTU105	1	1	0	0	0	0	0	0	0	0	2
d__Bacteria	k__norank_d__Bacteria	p__Actinobacteriota	c__Thermoleophilia	o__Gaiellales	f__norank_o__Gaiellales	g__norank_f__norank_o__Gaiellales	s__Gaiella_sp._EBR4-RS1	OTU176	0	1	0	0	0	0	0	0	0	0	1
d__Bacteria	k__norank_d__Bacteria	p__Chloroflexi	c__Anaerolineae	o__SJA-15	f__norank_o__SJA-15	g__norank_f__norank_o__SJA-15	s__uncultured_bacterium_g__norank_f__norank_o__SJA-15	OTU112	1	10	4	2	0	1	4	3	3	1	29
d__Bacteria	k__norank_d__Bacteria	p__Actinobacteriota	c__Acidimicrobiia	o__Microtrichales	f__norank_o__Microtrichales	g__norank_f__norank_o__Microtrichales	s__metagenome_g__norank_f__norank_o__Microtrichales	OTU508	1	6	0	0	0	0	2	1	3	0	13
d__Bacteria	k__norank_d__Bacteria	p__Proteobacteria	c__Gammaproteobacteria	o__Burkholderiales	f__unclassified_o__Burkholderiales	g__unclassified_o__Burkholderiales	s__unclassified_o__Burkholderiales	OTU228	1	0	3	4	0	1	0	0	0	0	9
d__Bacteria	k__norank_d__Bacteria	p__Proteobacteria	c__Alphaproteobacteria	o__Rickettsiales	f__norank_o__Rickettsiales	g__norank_f__norank_o__Rickettsiales	s__uncultured_bacterium_g__norank_f__norank_o__Rickettsiales	OTU321	34	0	0	0	0	0	7	2	0	2	45
d__Bacteria	k__norank_d__Bacteria	p__Bacteroidota	c__Bacteroidia	o__Bacteroidales	f__Prolixibacteraceae	g__norank_f__Prolixibacteraceae	s__unclassified_g__norank_f__Prolixibacteraceae	OTU308	0	0	0	0	0	0	0	0	0	1	1
d__Bacteria	k__norank_d__Bacteria	p__Bacteroidota	c__Bacteroidia	o__Chitinophagales	f__Saprospiraceae	g__norank_f__Saprospiraceae	s__unclassified_g__norank_f__Saprospiraceae	OTU918	3	0	0	0	0	0	0	0	0	0	3
d__Bacteria	k__norank_d__Bacteria	p__Actinobacteriota	c__Actinobacteria	o__Propionibacteriales	f__Propionibacteriaceae	g__Propioniciclava	s__metagenome_g__Propioniciclava	OTU1006	1	6	0	3	0	1	1	1	1	2	16
d__Bacteria	k__norank_d__Bacteria	p__Actinobacteriota	c__Acidimicrobiia	o__norank_c__Acidimicrobiia	f__norank_o__norank_c__Acidimicrobiia	g__norank_f__norank_o__norank_c__Acidimicrobiia	s__uncultured_forest_soil_bacterium_g__norank_f__norank_o__norank_c__Acidimicrobiia	OTU346	0	0	1	0	0	0	0	0	0	0	1
d__Bacteria	k__norank_d__Bacteria	p__Bacteroidota	c__Bacteroidia	o__Chitinophagales	f__Chitinophagaceae	g__unclassified_f__Chitinophagaceae	s__unclassified_f__Chitinophagaceae	OTU1077	1	1	0	0	1	0	0	1	0	0	4
d__Bacteria	k__norank_d__Bacteria	p__Proteobacteria	c__Alphaproteobacteria	o__Sphingomonadales	f__Sphingomonadaceae	g__Novosphingobium	s__metagenome_g__Novosphingobium	OTU59	1	0	0	0	1	0	0	1	0	1	4
d__Bacteria	k__norank_d__Bacteria	p__Bacteroidota	c__Bacteroidia	o__Flavobacteriales	f__Weeksellaceae	g__unclassified_f__Weeksellaceae	s__unclassified_f__Weeksellaceae	OTU965	0	0	0	0	0	0	0	0	0	1	1
d__Bacteria	k__norank_d__Bacteria	p__Verrucomicrobiota	c__Kiritimatiellae	o__WCHB1-41	f__norank_o__WCHB1-41	g__norank_f__norank_o__WCHB1-41	s__unclassified_g__norank_f__norank_o__WCHB1-41	OTU77	0	2	0	0	0	0	0	0	0	0	2
d__Bacteria	k__norank_d__Bacteria	p__Proteobacteria	c__Gammaproteobacteria	o__Burkholderiales	f__Neisseriaceae	g__norank_f__Neisseriaceae	s__unclassified_g__norank_f__Neisseriaceae	OTU1068	1	0	0	0	0	0	0	0	0	0	1
d__Bacteria	k__norank_d__Bacteria	p__Bacteroidota	c__Bacteroidia	o__Chitinophagales	f__Chitinophagaceae	g__Dinghuibacter	s__uncultured_bacterium_g__Dinghuibacter	OTU333	2	1	2	0	0	3	0	0	0	3	11
d__Bacteria	k__norank_d__Bacteria	p__Patescibacteria	c__Saccharimonadia	o__Saccharimonadales	f__norank_o__Saccharimonadales	g__norank_f__norank_o__Saccharimonadales	s__uncultured_candidate_division_WS5_bacterium	OTU497	0	0	0	0	0	0	0	0	1	0	1
d__Bacteria	k__norank_d__Bacteria	p__Proteobacteria	c__Alphaproteobacteria	o__Rhizobiales	f__Pleomorphomonadaceae	g__Chthonobacter	s__uncultured_bacterium_g__Chthonobacter	OTU887	5	7	1	1	1	0	2	0	6	1	24
d__Bacteria	k__norank_d__Bacteria	p__Patescibacteria	c__Saccharimonadia	o__Saccharimonadales	f__norank_o__Saccharimonadales	g__norank_f__norank_o__Saccharimonadales	s__uncultured_bacterium_g__norank_f__norank_o__Saccharimonadales	OTU812	604	212	44	1059	0	112	642	807	31	524	4035
d__Bacteria	k__norank_d__Bacteria	p__unclassified_k__norank_d__Bacteria	c__unclassified_k__norank_d__Bacteria	o__unclassified_k__norank_d__Bacteria	f__unclassified_k__norank_d__Bacteria	g__unclassified_k__norank_d__Bacteria	s__unclassified_k__norank_d__Bacteria	OTU6	1	1	0	0	0	0	0	0	0	0	2
d__Bacteria	k__norank_d__Bacteria	p__Chloroflexi	c__Anaerolineae	o__Anaerolineales	f__Anaerolineaceae	g__norank_f__Anaerolineaceae	s__unclassified_g__norank_f__Anaerolineaceae	OTU107	0	3	1	1	0	0	0	0	0	0	5
d__Bacteria	k__norank_d__Bacteria	p__Chloroflexi	c__Anaerolineae	o__Anaerolineales	f__Anaerolineaceae	g__norank_f__Anaerolineaceae	s__uncultured_Chloroflexi_bacterium_g__norank_f__Anaerolineaceae	OTU68	1	10	3	1	0	0	3	0	0	0	18
d__Bacteria	k__norank_d__Bacteria	p__Bacteroidota	c__Bacteroidia	o__Bacteroidales	f__Rikenellaceae	g__norank_f__Rikenellaceae	s__uncultured_bacterium_SHA-7	OTU961	0	0	0	0	0	1	0	0	0	0	1
d__Bacteria	k__norank_d__Bacteria	p__Proteobacteria	c__Alphaproteobacteria	o__Reyranellales	f__Reyranellaceae	g__Reyranella	s__uncultured_bacterium_g__Reyranella	OTU996	0	1	0	0	0	0	0	0	1	0	2
d__Bacteria	k__norank_d__Bacteria	p__Patescibacteria	c__CPR2	o__norank_c__CPR2	f__norank_o__norank_c__CPR2	g__norank_f__norank_o__norank_c__CPR2	s__uncultured_bacterium_g__norank_f__norank_o__norank_c__CPR2	OTU1001	1	0	1	0	0	0	0	1	1	0	4
d__Bacteria	k__norank_d__Bacteria	p__Campilobacterota	c__Campylobacteria	o__Campylobacterales	f__Arcobacteraceae	g__Malaciobacter	s__Arcobacter_mytili_LMG_24559	OTU655	103	0	1	0	0	1	0	0	0	0	105
d__Bacteria	k__norank_d__Bacteria	p__Bacteroidota	c__Bacteroidia	o__Chitinophagales	f__Saprospiraceae	g__norank_f__Saprospiraceae	s__unclassified_g__norank_f__Saprospiraceae	OTU357	1	0	0	0	0	1	0	3	0	0	5
d__Bacteria	k__norank_d__Bacteria	p__Proteobacteria	c__Gammaproteobacteria	o__Burkholderiales	f__Methylophilaceae	g__unclassified_f__Methylophilaceae	s__unclassified_f__Methylophilaceae	OTU932	0	0	0	1	0	0	0	0	0	1	2
d__Bacteria	k__norank_d__Bacteria	p__Nitrospirota	c__Thermodesulfovibrionia	o__norank_c__Thermodesulfovibrionia	f__norank_o__norank_c__Thermodesulfovibrionia	g__norank_f__norank_o__norank_c__Thermodesulfovibrionia	s__uncultured_prokaryote_g__norank_f__norank_o__norank_c__Thermodesulfovibrionia	OTU644	0	0	1	0	0	1	0	0	0	0	2
d__Bacteria	k__norank_d__Bacteria	p__Desulfobacterota	c__Desulfobaccia	o__Desulfobaccales	f__Desulfobaccaceae	g__Desulfobacca	s__unclassified_g__Desulfobacca	OTU120	1	6	0	0	0	0	0	0	2	0	9
d__Bacteria	k__norank_d__Bacteria	p__Proteobacteria	c__Gammaproteobacteria	o__Chromatiales	f__Chromatiaceae	g__norank_f__Chromatiaceae	s__uncultured_bacterium_g__norank_f__Chromatiaceae	OTU553	0	0	1	1	0	0	1	1	1	0	5
d__Bacteria	k__norank_d__Bacteria	p__Chloroflexi	c__Anaerolineae	o__SBR1031	f__norank_o__SBR1031	g__norank_f__norank_o__SBR1031	s__unclassified_g__norank_f__norank_o__SBR1031	OTU132	1	1	0	0	0	0	1	0	0	0	3
d__Bacteria	k__norank_d__Bacteria	p__Actinobacteriota	c__unclassified_p__Actinobacteriota	o__unclassified_p__Actinobacteriota	f__unclassified_p__Actinobacteriota	g__unclassified_p__Actinobacteriota	s__unclassified_p__Actinobacteriota	OTU23	2	3	2	1	0	1	1	3	1	1	15
d__Bacteria	k__norank_d__Bacteria	p__Firmicutes	c__Bacilli	o__Erysipelotrichales	f__Erysipelotrichaceae	g__Anaerorhabdus_furcosa_group	s__uncultured_Anaerorhabdus_sp.	OTU573	28	114	704	0	929	310	105	266	1	1119	3576
d__Bacteria	k__norank_d__Bacteria	p__Proteobacteria	c__Gammaproteobacteria	o__Competibacterales	f__Competibacteraceae	g__Candidatus_Competibacter	s__unclassified_g__Candidatus_Competibacter	OTU153	0	3	0	0	0	0	0	0	2	0	5
d__Bacteria	k__norank_d__Bacteria	p__Chloroflexi	c__Anaerolineae	o__SBR1031	f__norank_o__SBR1031	g__norank_f__norank_o__SBR1031	s__unclassified_g__norank_f__norank_o__SBR1031	OTU953	1	0	0	0	0	0	0	0	0	0	1
d__Bacteria	k__norank_d__Bacteria	p__Firmicutes	c__Bacilli	o__Lactobacillales	f__Enterococcaceae	g__Enterococcus	s__Enterococcus_casseliflavus_g__Enterococcus	OTU666	0	1	0	0	0	0	0	0	0	0	1
d__Bacteria	k__norank_d__Bacteria	p__Patescibacteria	c__Dojkabacteria	o__norank_c__Dojkabacteria	f__norank_o__norank_c__Dojkabacteria	g__norank_f__norank_o__norank_c__Dojkabacteria	s__unclassified_g__norank_f__norank_o__norank_c__Dojkabacteria	OTU560	0	0	0	0	3	0	0	0	0	0	3
d__Bacteria	k__norank_d__Bacteria	p__Chloroflexi	c__Chloroflexia	o__Thermomicrobiales	f__JG30-KF-CM45	g__norank_f__JG30-KF-CM45	s__metagenome_g__norank_f__JG30-KF-CM45	OTU100	0	5	0	0	0	0	0	0	0	0	5
d__Bacteria	k__norank_d__Bacteria	p__Proteobacteria	c__Alphaproteobacteria	o__Micavibrionales	f__Micavibrionaceae	g__norank_f__Micavibrionaceae	s__uncultured_bacterium_g__norank_f__Micavibrionaceae	OTU190	1	0	0	0	1	0	0	0	0	0	2
d__Bacteria	k__norank_d__Bacteria	p__Proteobacteria	c__Alphaproteobacteria	o__Rhizobiales	f__Beijerinckiaceae	g__Methylocystis	s__uncultured_bacterium_g__Methylocystis	OTU1016	54	45	12	18	4	4	16	28	52	12	245
d__Bacteria	k__norank_d__Bacteria	p__Firmicutes	c__Clostridia	o__Clostridiales	f__Clostridiaceae	g__Clostridium_sensu_stricto_1	s__unclassified_g__Clostridium_sensu_stricto_1	OTU167	0	0	0	3	0	0	0	0	0	0	3
d__Bacteria	k__norank_d__Bacteria	p__Proteobacteria	c__Alphaproteobacteria	o__Rhizobiales	f__Devosiaceae	g__Devosia	s__unclassified_g__Devosia	OTU489	0	0	1	0	0	1	0	1	0	0	3
d__Bacteria	k__norank_d__Bacteria	p__Patescibacteria	c__Dojkabacteria	o__norank_c__Dojkabacteria	f__norank_o__norank_c__Dojkabacteria	g__norank_f__norank_o__norank_c__Dojkabacteria	s__Chloroflexi_bacterium_RBG_13_46_9_g__norank	OTU1161	0	0	0	0	0	0	1	0	0	0	1
d__Bacteria	k__norank_d__Bacteria	p__Bacteroidota	c__Bacteroidia	o__Chitinophagales	f__Chitinophagaceae	g__Edaphobaculum	s__unclassified_g__Edaphobaculum	OTU375	0	0	0	0	0	0	0	0	0	2	2
d__Bacteria	k__norank_d__Bacteria	p__Actinobacteriota	c__Actinobacteria	o__Micrococcales	f__Micrococcaceae	g__Renibacterium	s__unclassified_g__Renibacterium	OTU896	0	0	1	0	0	0	0	0	0	0	1
d__Bacteria	k__norank_d__Bacteria	p__Patescibacteria	c__Saccharimonadia	o__Saccharimonadales	f__norank_o__Saccharimonadales	g__norank_f__norank_o__Saccharimonadales	s__uncultured_bacterium_g__norank_f__norank_o__Saccharimonadales	OTU639	0	1	0	0	0	1	0	0	0	0	2
d__Bacteria	k__norank_d__Bacteria	p__Chloroflexi	c__Anaerolineae	o__SJA-15	f__norank_o__SJA-15	g__norank_f__norank_o__SJA-15	s__unclassified_g__norank_f__norank_o__SJA-15	OTU144	5	22	2	0	0	0	10	1	8	0	48
d__Bacteria	k__norank_d__Bacteria	p__Firmicutes	c__Bacilli	o__unclassified_c__Bacilli	f__unclassified_c__Bacilli	g__unclassified_c__Bacilli	s__unclassified_c__Bacilli	OTU884	0	5	1	0	0	0	0	0	1	0	7
d__Bacteria	k__norank_d__Bacteria	p__Proteobacteria	c__Alphaproteobacteria	o__Sphingomonadales	f__Sphingomonadaceae	g__Porphyrobacter	s__unclassified_g__Porphyrobacter	OTU195	2	2	6	1	3	2	0	4	1	0	21
d__Bacteria	k__norank_d__Bacteria	p__Proteobacteria	c__Gammaproteobacteria	o__Burkholderiales	f__Sutterellaceae	g__norank_f__Sutterellaceae	s__unclassified_g__norank_f__Sutterellaceae	OTU1078	2	14	18	0	2	8	3	4	2	5	58
d__Bacteria	k__norank_d__Bacteria	p__Desulfobacterota	c__Syntrophobacteria	o__Syntrophobacterales	f__Syntrophobacteraceae	g__norank_f__Syntrophobacteraceae	s__uncultured_prokaryote_g__norank_f__Syntrophobacteraceae	OTU997	0	0	0	1	0	1	0	0	2	0	4
d__Bacteria	k__norank_d__Bacteria	p__Verrucomicrobiota	c__Verrucomicrobiae	o__Verrucomicrobiales	f__Verrucomicrobiaceae	g__norank_f__Verrucomicrobiaceae	s__metagenome_g__norank_f__Verrucomicrobiaceae	OTU203	0	0	1	1	0	1	0	0	1	0	4
d__Bacteria	k__norank_d__Bacteria	p__Nitrospinota	c__P9X2b3D02	o__norank_c__P9X2b3D02	f__norank_o__norank_c__P9X2b3D02	g__norank_f__norank_o__norank_c__P9X2b3D02	s__uncultured_prokaryote_g__norank_f__norank_o__norank_c__P9X2b3D02	OTU128	0	2	0	0	0	0	0	0	0	0	2
d__Bacteria	k__norank_d__Bacteria	p__Chloroflexi	c__Chloroflexia	o__Chloroflexales	f__Chloroflexaceae	g__Chloronema	s__uncultured_bacterium_g__Chloronema	OTU131	0	2	0	0	0	0	0	0	0	0	2
d__Bacteria	k__norank_d__Bacteria	p__Actinobacteriota	c__Thermoleophilia	o__Gaiellales	f__norank_o__Gaiellales	g__norank_f__norank_o__Gaiellales	s__unclassified_g__norank_f__norank_o__Gaiellales	OTU755	1	0	1	1	0	2	4	0	1	1	11
d__Bacteria	k__norank_d__Bacteria	p__Verrucomicrobiota	c__Verrucomicrobiae	o__Verrucomicrobiales	f__unclassified_o__Verrucomicrobiales	g__unclassified_o__Verrucomicrobiales	s__unclassified_o__Verrucomicrobiales	OTU1071	0	1	0	0	0	0	0	1	0	0	2
d__Bacteria	k__norank_d__Bacteria	p__Cyanobacteria	c__Cyanobacteriia	o__Chloroplast	f__norank_o__Chloroplast	g__norank_f__norank_o__Chloroplast	s__Monoraphidium_neglectum	OTU659	0	8	0	0	0	0	0	0	0	0	8
d__Bacteria	k__norank_d__Bacteria	p__Chloroflexi	c__unclassified_p__Chloroflexi	o__unclassified_p__Chloroflexi	f__unclassified_p__Chloroflexi	g__unclassified_p__Chloroflexi	s__unclassified_p__Chloroflexi	OTU117	0	2	0	0	0	0	0	0	0	0	2
d__Bacteria	k__norank_d__Bacteria	p__Actinobacteriota	c__Actinobacteria	o__Propionibacteriales	f__Nocardioidaceae	g__Nocardioides	s__Nocardioides_exalbidus	OTU704	0	1	0	0	0	0	1	0	0	0	2
d__Bacteria	k__norank_d__Bacteria	p__Acidobacteriota	c__Blastocatellia	o__Blastocatellales	f__Blastocatellaceae	g__unclassified_f__Blastocatellaceae	s__unclassified_f__Blastocatellaceae	OTU32	2	0	0	0	0	0	1	1	0	0	4
d__Bacteria	k__norank_d__Bacteria	p__Patescibacteria	c__Saccharimonadia	o__Saccharimonadales	f__norank_o__Saccharimonadales	g__norank_f__norank_o__Saccharimonadales	s__uncultured_bacterium_SBR2013	OTU149	0	10	0	0	1	0	0	0	0	0	11
d__Bacteria	k__norank_d__Bacteria	p__Chloroflexi	c__Anaerolineae	o__ADurb.Bin180	f__norank_o__ADurb.Bin180	g__norank_f__norank_o__ADurb.Bin180	s__uncultured_organism_g__norank_f__norank_o__ADurb.Bin180	OTU141	0	3	0	0	0	0	0	0	1	0	4
d__Bacteria	k__norank_d__Bacteria	p__Firmicutes	c__Bacilli	o__Mycoplasmatales	f__Mycoplasmataceae	g__norank_f__Mycoplasmataceae	s__uncultured_Firmicutes_bacterium_g__norank_f__Mycoplasmataceae	OTU1105	652	206	153	365	15	6	101	90	1998	299	3885
d__Bacteria	k__norank_d__Bacteria	p__Myxococcota	c__Polyangia	o__Polyangiales	f__Polyangiaceae	g__Minicystis	s__unclassified_g__Minicystis	OTU867	0	1	0	0	0	0	1	0	0	0	2
d__Bacteria	k__norank_d__Bacteria	p__Proteobacteria	c__Gammaproteobacteria	o__Alteromonadales	f__Shewanellaceae	g__Shewanella	s__Shewanella_sp._MR-7	OTU383	0	0	0	0	0	0	0	0	0	3	3
d__Bacteria	k__norank_d__Bacteria	p__Patescibacteria	c__Saccharimonadia	o__Saccharimonadales	f__LWQ8	g__norank_f__LWQ8	s__uncultured_bacterium_g__norank_f__LWQ8	OTU828	12	5	2	0	2	5	1	5	5	3	40
d__Bacteria	k__norank_d__Bacteria	p__Cyanobacteria	c__Cyanobacteriia	o__Synechococcales	f__Cyanobiaceae	g__Cyanobium_PCC-6307	s__unclassified_g__Cyanobium_PCC-6307	OTU96	43	43	3	15	3	9	10	6	9	12	153
d__Bacteria	k__norank_d__Bacteria	p__NKB15	c__norank_p__NKB15	o__norank_c__norank_p__NKB15	f__norank_o__norank_c__norank_p__NKB15	g__norank_f__norank_o__norank_c__norank_p__NKB15	s__uncultured_bacterium_g__norank_f__norank_o__norank_c__norank_p__NKB15	OTU827	0	0	0	0	1	0	0	1	0	0	2
d__Bacteria	k__norank_d__Bacteria	p__Firmicutes	c__Clostridia	o__Peptostreptococcales-Tissierellales	f__Acidaminobacteraceae	g__Acidaminobacter	s__uncultured_prokaryote_g__Acidaminobacter	OTU930	0	0	0	0	2	0	0	0	0	0	2
d__Bacteria	k__norank_d__Bacteria	p__Chloroflexi	c__Anaerolineae	o__SJA-15	f__norank_o__SJA-15	g__norank_f__norank_o__SJA-15	s__uncultured_bacterium_g__norank_f__norank_o__SJA-15	OTU507	4	0	0	0	0	0	2	0	0	0	6
d__Bacteria	k__norank_d__Bacteria	p__Verrucomicrobiota	c__Verrucomicrobiae	o__Verrucomicrobiales	f__Verrucomicrobiaceae	g__norank_f__Verrucomicrobiaceae	s__uncultured_soil_bacterium_g__norank_f__Verrucomicrobiaceae	OTU890	1	0	0	0	1	0	0	0	1	0	3
d__Bacteria	k__norank_d__Bacteria	p__Proteobacteria	c__Alphaproteobacteria	o__Rhizobiales	f__Rhizobiaceae	g__Allorhizobium-Neorhizobium-Pararhizobium-Rhizobium	s__unclassified_g__Allorhizobium-Neorhizobium-Pararhizobium-Rhizobium	OTU865	0	7	1	1	0	1	0	1	0	0	11
d__Bacteria	k__norank_d__Bacteria	p__Cyanobacteria	c__Cyanobacteriia	o__Cyanobacteriales	f__Geitlerinemaceae	g__Geitlerinema_PCC-7105	s__uncultured_cyanobacterium_g__Geitlerinema_PCC-7105	OTU557	0	0	0	0	1	0	0	0	0	0	1
d__Bacteria	k__norank_d__Bacteria	p__Firmicutes	c__Bacilli	o__Entomoplasmatales	f__Entomoplasmatales_Incertae_Sedis	g__Candidatus_Hepatoplasma	s__unclassified_g__Candidatus_Hepatoplasma	OTU555	1333	81	24	2226	228	0	1794	2172	9174	766	17798
d__Bacteria	k__norank_d__Bacteria	p__Actinobacteriota	c__Acidimicrobiia	o__Microtrichales	f__Microtrichaceae	g__norank_f__Microtrichaceae	s__unclassified_g__norank_f__Microtrichaceae	OTU550	1	1	0	0	0	0	0	0	0	0	2
d__Bacteria	k__norank_d__Bacteria	p__Proteobacteria	c__Gammaproteobacteria	o__Pseudomonadales	f__Moraxellaceae	g__Acinetobacter	s__unclassified_g__Acinetobacter	OTU215	0	1	3	0	19	2	0	0	0	0	25
d__Bacteria	k__norank_d__Bacteria	p__Actinobacteriota	c__Acidimicrobiia	o__Microtrichales	f__Microtrichaceae	g__IMCC26207	s__unclassified_g__IMCC26207	OTU1172	1	1	0	0	0	0	0	0	0	0	2
d__Bacteria	k__norank_d__Bacteria	p__Cyanobacteria	c__Cyanobacteriia	o__Chloroplast	f__norank_o__Chloroplast	g__norank_f__norank_o__Chloroplast	s__unclassified_g__norank_f__norank_o__Chloroplast	OTU564	1	0	0	0	1	0	0	2	0	0	4
d__Bacteria	k__norank_d__Bacteria	p__Firmicutes	c__Bacilli	o__Mycoplasmatales	f__Mycoplasmataceae	g__norank_f__Mycoplasmataceae	s__uncultured_Firmicutes_bacterium_g__norank_f__Mycoplasmataceae	OTU1149	4	0	1	212	0	0	12	0	0	6	235
d__Bacteria	k__norank_d__Bacteria	p__Actinobacteriota	c__Acidimicrobiia	o__unclassified_c__Acidimicrobiia	f__unclassified_c__Acidimicrobiia	g__unclassified_c__Acidimicrobiia	s__unclassified_c__Acidimicrobiia	OTU641	1	1	0	0	0	1	0	0	0	0	3
d__Bacteria	k__norank_d__Bacteria	p__Cyanobacteria	c__Vampirivibrionia	o__Vampirovibrionales	f__norank_o__Vampirovibrionales	g__norank_f__norank_o__Vampirovibrionales	s__uncultured_bacterium_g__norank_f__norank_o__Vampirovibrionales	OTU1096	0	0	0	0	0	0	0	0	0	1	1
d__Bacteria	k__norank_d__Bacteria	p__Patescibacteria	c__Parcubacteria	o__Candidatus_Kaiserbacteria	f__norank_o__Candidatus_Kaiserbacteria	g__norank_f__norank_o__Candidatus_Kaiserbacteria	s__uncultured_bacterium_g__norank_f__norank_o__Candidatus_Kaiserbacteria	OTU371	0	0	0	0	0	1	0	0	0	0	1
d__Bacteria	k__norank_d__Bacteria	p__Proteobacteria	c__Gammaproteobacteria	o__Burkholderiales	f__Comamonadaceae	g__Ramlibacter	s__unclassified_g__Ramlibacter	OTU281	1	0	3	0	0	0	0	4	0	0	8
d__Bacteria	k__norank_d__Bacteria	p__Desulfobacterota	c__Desulfobulbia	o__Desulfobulbales	f__Desulfobulbaceae	g__Desulfobulbus	s__uncultured_bacterium_g__Desulfobulbus	OTU614	0	0	0	0	0	1	1	0	0	0	2
d__Bacteria	k__norank_d__Bacteria	p__Bacteroidota	c__Bacteroidia	o__Bacteroidales	f__Prolixibacteraceae	g__Roseimarinus	s__uncultured_bacterium_g__Roseimarinus	OTU1100	0	0	0	0	0	0	0	0	0	1	1
d__Bacteria	k__norank_d__Bacteria	p__Actinobacteriota	c__Acidimicrobiia	o__Microtrichales	f__Microtrichaceae	g__Sva0996_marine_group	s__unclassified_g__Sva0996_marine_group	OTU736	0	0	0	0	0	0	1	0	1	0	2
d__Bacteria	k__norank_d__Bacteria	p__Patescibacteria	c__Saccharimonadia	o__Saccharimonadales	f__norank_o__Saccharimonadales	g__norank_f__norank_o__Saccharimonadales	s__unclassified_g__norank_f__norank_o__Saccharimonadales	OTU87	15	6	1	1	1	1	1	0	10	3	39
d__Bacteria	k__norank_d__Bacteria	p__Chloroflexi	c__Anaerolineae	o__Anaerolineales	f__Anaerolineaceae	g__norank_f__Anaerolineaceae	s__unclassified_g__norank_f__Anaerolineaceae	OTU813	0	0	0	0	0	0	0	2	0	0	2
d__Bacteria	k__norank_d__Bacteria	p__Chloroflexi	c__Anaerolineae	o__ADurb.Bin180	f__norank_o__ADurb.Bin180	g__norank_f__norank_o__ADurb.Bin180	s__uncultured_bacterium_SJA-68	OTU974	1	1	0	0	0	0	0	1	1	0	4
d__Bacteria	k__norank_d__Bacteria	p__Chloroflexi	c__Anaerolineae	o__unclassified_c__Anaerolineae	f__unclassified_c__Anaerolineae	g__unclassified_c__Anaerolineae	s__unclassified_c__Anaerolineae	OTU765	7	12	2	1	0	1	5	0	1	2	31
d__Bacteria	k__norank_d__Bacteria	p__Patescibacteria	c__CPR2	o__norank_c__CPR2	f__norank_o__norank_c__CPR2	g__norank_f__norank_o__norank_c__CPR2	s__uncultured_bacterium_g__norank_f__norank_o__norank_c__CPR2	OTU66	0	6	3	1	0	1	4	0	1	0	16
d__Bacteria	k__norank_d__Bacteria	p__Patescibacteria	c__CPR2	o__norank_c__CPR2	f__norank_o__norank_c__CPR2	g__norank_f__norank_o__norank_c__CPR2	s__uncultured_bacterium_g__norank_f__norank_o__norank_c__CPR2	OTU65	0	1	0	0	0	0	0	0	0	0	1
d__Bacteria	k__norank_d__Bacteria	p__Bacteroidota	c__Bacteroidia	o__Flavobacteriales	f__Flavobacteriaceae	g__Actibacter	s__uncultured_bacterium_g__Actibacter	OTU457	0	3	2	1	2	0	0	0	0	1	9
d__Bacteria	k__norank_d__Bacteria	p__Chloroflexi	c__Anaerolineae	o__Caldilineales	f__Caldilineaceae	g__norank_f__Caldilineaceae	s__uncultured_bacterium_g__norank_f__Caldilineaceae	OTU1141	0	0	0	0	0	0	0	0	0	4	4
d__Bacteria	k__norank_d__Bacteria	p__Firmicutes	c__Clostridia	o__Lachnospirales	f__Lachnospiraceae	g__unclassified_f__Lachnospiraceae	s__unclassified_f__Lachnospiraceae	OTU14	1	0	0	0	0	0	0	0	0	0	1
d__Bacteria	k__norank_d__Bacteria	p__Patescibacteria	c__Saccharimonadia	o__Saccharimonadales	f__Saccharimonadaceae	g__unclassified_f__Saccharimonadaceae	s__unclassified_f__Saccharimonadaceae	OTU822	30	7	7	6	9	0	7	21	4	3	94
d__Bacteria	k__norank_d__Bacteria	p__Bacteroidota	c__Bacteroidia	o__Flavobacteriales	f__Weeksellaceae	g__Cloacibacterium	s__unclassified_g__Cloacibacterium	OTU563	2	0	0	2	1	6	0	2	0	0	13
d__Bacteria	k__norank_d__Bacteria	p__Cyanobacteria	c__Cyanobacteriia	o__Chloroplast	f__norank_o__Chloroplast	g__norank_f__norank_o__Chloroplast	s__unclassified_g__norank_f__norank_o__Chloroplast	OTU1162	0	1	0	0	0	0	2	0	0	0	3
d__Bacteria	k__norank_d__Bacteria	p__Actinobacteriota	c__Coriobacteriia	o__OPB41	f__norank_o__OPB41	g__norank_f__norank_o__OPB41	s__unclassified_g__norank_f__norank_o__OPB41	OTU1064	19	62	25	31	5	9	21	9	4	9	194
d__Bacteria	k__norank_d__Bacteria	p__unclassified_k__norank_d__Bacteria	c__unclassified_k__norank_d__Bacteria	o__unclassified_k__norank_d__Bacteria	f__unclassified_k__norank_d__Bacteria	g__unclassified_k__norank_d__Bacteria	s__unclassified_k__norank_d__Bacteria	OTU253	0	1	1	0	0	0	0	0	1	0	3
d__Bacteria	k__norank_d__Bacteria	p__Proteobacteria	c__Gammaproteobacteria	o__Burkholderiales	f__Burkholderiaceae	g__unclassified_f__Burkholderiaceae	s__unclassified_f__Burkholderiaceae	OTU307	0	0	0	0	1	0	0	1	0	0	2
d__Bacteria	k__norank_d__Bacteria	p__Proteobacteria	c__Gammaproteobacteria	o__Run-SP154	f__norank_o__Run-SP154	g__norank_f__norank_o__Run-SP154	s__uncultured_bacterium_g__norank_f__norank_o__Run-SP154	OTU556	1	2	3	0	0	1	2	0	6	1	16
d__Bacteria	k__norank_d__Bacteria	p__Patescibacteria	c__Saccharimonadia	o__Saccharimonadales	f__norank_o__Saccharimonadales	g__norank_f__norank_o__Saccharimonadales	s__unclassified_g__norank_f__norank_o__Saccharimonadales	OTU589	0	0	0	0	0	0	0	1	0	0	1
d__Bacteria	k__norank_d__Bacteria	p__Actinobacteriota	c__Coriobacteriia	o__OPB41	f__norank_o__OPB41	g__norank_f__norank_o__OPB41	s__uncultured_bacterium_g__norank_f__norank_o__OPB41	OTU69	3	17	3	6	0	0	7	3	0	0	39
d__Bacteria	k__norank_d__Bacteria	p__Firmicutes	c__Clostridia	o__Eubacteriales	f__Eubacteriaceae	g__Acetobacterium	s__uncultured_bacterium_g__Acetobacterium	OTU690	3	0	0	1	0	1	0	0	0	0	5
d__Bacteria	k__norank_d__Bacteria	p__Bacteroidota	c__Bacteroidia	o__Flavobacteriales	f__Weeksellaceae	g__Chryseobacterium	s__unclassified_g__Chryseobacterium	OTU208	0	0	2	0	0	0	0	0	0	0	2
d__Bacteria	k__norank_d__Bacteria	p__Proteobacteria	c__Alphaproteobacteria	o__Sphingomonadales	f__Sphingomonadaceae	g__Sphingorhabdus	s__uncultured_bacterium_g__Sphingorhabdus	OTU109	1	5	2	1	3	0	1	2	1	3	19
d__Bacteria	k__norank_d__Bacteria	p__Actinobacteriota	c__Acidimicrobiia	o__Microtrichales	f__Ilumatobacteraceae	g__Ilumatobacter	s__uncultured_bacterium_g__Ilumatobacter	OTU1142	2	10	1	3	1	4	5	2	2	2	32
d__Bacteria	k__norank_d__Bacteria	p__Proteobacteria	c__Gammaproteobacteria	o__PLTA13	f__norank_o__PLTA13	g__norank_f__norank_o__PLTA13	s__uncultured_bacterium_g__norank_f__norank_o__PLTA13	OTU645	0	1	0	0	0	1	0	0	1	0	3
d__Bacteria	k__norank_d__Bacteria	p__Desulfobacterota	c__Desulfobacteria	o__Desulfatiglandales	f__Desulfatiglandaceae	g__Desulfatiglans	s__uncultured_delta_proteobacterium_g__Desulfatiglans	OTU116	4	3	1	0	0	2	0	0	0	2	12
d__Bacteria	k__norank_d__Bacteria	p__Proteobacteria	c__Gammaproteobacteria	o__Burkholderiales	f__Burkholderiaceae	g__Polynucleobacter	s__uncultured_bacterium_g__Polynucleobacter	OTU431	1	0	0	0	1	1	0	1	0	0	4
d__Bacteria	k__norank_d__Bacteria	p__Proteobacteria	c__Gammaproteobacteria	o__Vibrionales	f__Vibrionaceae	g__Vibrio	s__Vibrio_campbellii	OTU642	249	2	85	66	285	1664	408	19	0	134	2912
d__Bacteria	k__norank_d__Bacteria	p__Chloroflexi	c__Anaerolineae	o__Caldilineales	f__Caldilineaceae	g__norank_f__Caldilineaceae	s__metagenome_g__norank_f__Caldilineaceae	OTU823	0	5	1	0	0	0	2	2	4	1	15
d__Bacteria	k__norank_d__Bacteria	p__Proteobacteria	c__Alphaproteobacteria	o__Rickettsiales	f__Rickettsiaceae	g__norank_f__Rickettsiaceae	s__uncultured_bacterium_g__norank_f__Rickettsiaceae	OTU1005	0	0	0	0	0	0	0	0	1	1	2
d__Bacteria	k__norank_d__Bacteria	p__Desulfobacterota	c__Syntrophobacteria	o__Syntrophobacterales	f__norank_o__Syntrophobacterales	g__norank_f__norank_o__Syntrophobacterales	s__uncultured_bacterium_g__norank_f__norank_o__Syntrophobacterales	OTU247	1	6	2	2	0	0	1	1	0	0	13
d__Bacteria	k__norank_d__Bacteria	p__Patescibacteria	c__Gracilibacteria	o__unclassified_c__Gracilibacteria	f__unclassified_c__Gracilibacteria	g__unclassified_c__Gracilibacteria	s__unclassified_c__Gracilibacteria	OTU269	0	0	2	0	0	0	0	0	0	0	2
d__Bacteria	k__norank_d__Bacteria	p__Chloroflexi	c__Anaerolineae	o__Anaerolineales	f__Anaerolineaceae	g__norank_f__Anaerolineaceae	s__unclassified_g__norank_f__Anaerolineaceae	OTU55	0	0	0	0	0	0	1	0	0	0	1
d__Bacteria	k__norank_d__Bacteria	p__Desulfobacterota	c__Desulfuromonadia	o__norank_c__Desulfuromonadia	f__Geothermobacteraceae	g__Geothermobacter	s__unclassified_g__Geothermobacter	OTU147	1	7	6	2	0	5	0	0	1	0	22
d__Bacteria	k__norank_d__Bacteria	p__Acidobacteriota	c__Blastocatellia	o__Blastocatellales	f__Blastocatellaceae	g__Blastocatella	s__uncultured_bacterium_g__Blastocatella	OTU1137	2	0	0	0	0	1	0	2	0	2	7
d__Bacteria	k__norank_d__Bacteria	p__Firmicutes	c__Clostridia	o__Lachnospirales	f__Lachnospiraceae	g__unclassified_f__Lachnospiraceae	s__unclassified_f__Lachnospiraceae	OTU981	0	0	0	0	1	0	0	0	1	0	2
d__Bacteria	k__norank_d__Bacteria	p__Proteobacteria	c__Alphaproteobacteria	o__Sphingomonadales	f__Sphingomonadaceae	g__Altererythrobacter	s__unclassified_g__Altererythrobacter	OTU1060	0	0	0	1	0	0	0	0	0	0	1
d__Bacteria	k__norank_d__Bacteria	p__Chloroflexi	c__Anaerolineae	o__Anaerolineales	f__Anaerolineaceae	g__norank_f__Anaerolineaceae	s__unclassified_g__norank_f__Anaerolineaceae	OTU58	0	2	0	0	0	0	0	0	0	0	2
d__Bacteria	k__norank_d__Bacteria	p__Proteobacteria	c__Alphaproteobacteria	o__Rhodobacterales	f__Rhodobacteraceae	g__Rubellimicrobium	s__unclassified_g__Rubellimicrobium	OTU881	0	1	2	1	0	1	1	1	2	0	9
d__Bacteria	k__norank_d__Bacteria	p__Patescibacteria	c__Gracilibacteria	o__norank_c__Gracilibacteria	f__norank_o__norank_c__Gracilibacteria	g__norank_f__norank_o__norank_c__Gracilibacteria	s__metagenome_g__norank_f__norank_o__norank_c__Gracilibacteria	OTU1119	0	0	0	0	0	0	0	0	0	3	3
d__Bacteria	k__norank_d__Bacteria	p__Chloroflexi	c__Anaerolineae	o__Caldilineales	f__Caldilineaceae	g__unclassified_f__Caldilineaceae	s__unclassified_f__Caldilineaceae	OTU998	4	5	0	2	0	0	6	1	5	0	23
d__Bacteria	k__norank_d__Bacteria	p__Firmicutes	c__Clostridia	o__Lachnospirales	f__Lachnospiraceae	g__unclassified_f__Lachnospiraceae	s__unclassified_f__Lachnospiraceae	OTU594	0	22	0	0	36	2	86	0	0	3	149
d__Bacteria	k__norank_d__Bacteria	p__Proteobacteria	c__Gammaproteobacteria	o__Burkholderiales	f__Comamonadaceae	g__Comamonas	s__Comamonas_aquatica	OTU957	0	0	1	0	0	0	1	0	0	0	2
d__Bacteria	k__norank_d__Bacteria	p__Bacteroidota	c__Bacteroidia	o__Cytophagales	f__Spirosomaceae	g__norank_f__Spirosomaceae	s__uncultured_bacterium_g__norank_f__Spirosomaceae	OTU513	9	9	3	2	0	0	6	3	1	3	36
d__Bacteria	k__norank_d__Bacteria	p__Proteobacteria	c__Gammaproteobacteria	o__Burkholderiales	f__Alcaligenaceae	g__Achromobacter	s__Achromobacter_insolitus_g__Achromobacter	OTU122	0	2	0	0	0	0	0	0	0	0	2
d__Bacteria	k__norank_d__Bacteria	p__Chloroflexi	c__Anaerolineae	o__SJA-15	f__norank_o__SJA-15	g__norank_f__norank_o__SJA-15	s__uncultured_bacterium_g__norank_f__norank_o__SJA-15	OTU744	4	11	2	6	1	1	2	2	1	0	30
d__Bacteria	k__norank_d__Bacteria	p__Bacteroidota	c__Bacteroidia	o__Cytophagales	f__Spirosomaceae	g__unclassified_f__Spirosomaceae	s__unclassified_f__Spirosomaceae	OTU586	0	0	0	1	0	0	0	0	0	1	2
d__Bacteria	k__norank_d__Bacteria	p__SAR324_cladeMarine_group_B	c__norank_p__SAR324_cladeMarine_group_B	o__norank_c__norank_p__SAR324_cladeMarine_group_B	f__norank_o__norank_c__norank_p__SAR324_cladeMarine_group_B	g__norank_f__norank_o__norank_c__norank_p__SAR324_cladeMarine_group_B	s__unclassified_g__norank_f__norank_o__norank_c__norank_p__SAR324_cladeMarine_group_B	OTU802	0	0	0	0	0	0	0	2	0	0	2
d__Bacteria	k__norank_d__Bacteria	p__Cyanobacteria	c__Cyanobacteriia	o__Cyanobacteriales	f__Microcystaceae	g__unclassified_f__Microcystaceae	s__unclassified_f__Microcystaceae	OTU110	0	3	0	0	0	0	0	0	0	0	3
d__Bacteria	k__norank_d__Bacteria	p__Desulfobacterota	c__Desulfobaccia	o__Desulfobaccales	f__Desulfobaccaceae	g__Desulfobacca	s__bacterium_enrichment_culture_clone_E8	OTU449	2	4	0	3	0	0	2	0	3	0	14
d__Bacteria	k__norank_d__Bacteria	p__Actinobacteriota	c__Acidimicrobiia	o__Microtrichales	f__Ilumatobacteraceae	g__CL500-29_marine_group	s__metagenome_g__CL500-29_marine_group	OTU1135	2	2	4	1	0	2	0	3	1	3	18
d__Bacteria	k__norank_d__Bacteria	p__Proteobacteria	c__Gammaproteobacteria	o__Legionellales	f__Legionellaceae	g__Legionella	s__uncultured_bacterium_g__Legionella	OTU50	0	1	0	0	0	0	0	0	1	0	2
d__Bacteria	k__norank_d__Bacteria	p__Bacteroidota	c__Bacteroidia	o__Bacteroidales	f__Prolixibacteraceae	g__Roseimarinus	s__uncultured_bacterium_g__Roseimarinus	OTU844	3	2	305	0	6183	776	18	74	0	2957	10318
d__Bacteria	k__norank_d__Bacteria	p__Chloroflexi	c__KD4-96	o__norank_c__KD4-96	f__norank_o__norank_c__KD4-96	g__norank_f__norank_o__norank_c__KD4-96	s__uncultured_Chloroflexi_bacterium_g__norank_f__norank_o__norank_c__KD4-96	OTU798	2	3	0	2	0	0	3	2	0	0	12
d__Bacteria	k__norank_d__Bacteria	p__Proteobacteria	c__Gammaproteobacteria	o__Pseudomonadales	f__Moraxellaceae	g__Acinetobacter	s__unclassified_g__Acinetobacter	OTU505	0	2	0	0	1	0	0	2	0	0	5
d__Bacteria	k__norank_d__Bacteria	p__Proteobacteria	c__Alphaproteobacteria	o__Rhodobacterales	f__Rhodobacteraceae	g__Gemmobacter	s__unclassified_g__Gemmobacter	OTU1061	6	16	21	8	4	24	4	8	6	5	102
d__Bacteria	k__norank_d__Bacteria	p__Firmicutes	c__Clostridia	o__Oscillospirales	f__Butyricicoccaceae	g__Butyricicoccus	s__unclassified_g__Butyricicoccus	OTU567	0	0	0	0	1	0	0	0	0	0	1
d__Bacteria	k__norank_d__Bacteria	p__Chloroflexi	c__Anaerolineae	o__RBG-13-54-9	f__norank_o__RBG-13-54-9	g__norank_f__norank_o__RBG-13-54-9	s__unclassified_g__norank_f__norank_o__RBG-13-54-9	OTU615	0	0	0	0	0	2	0	0	0	0	2
d__Bacteria	k__norank_d__Bacteria	p__Desulfobacterota	c__Desulfobacteria	o__Desulfobacterales	f__Desulfosarcinaceae	g__Sva0081_sediment_group	s__uncultured_bacterium_g__Sva0081_sediment_group	OTU233	2	4	5	1	0	1	0	0	0	0	13
d__Bacteria	k__norank_d__Bacteria	p__Desulfobacterota	c__Desulfobaccia	o__Desulfobaccales	f__Desulfobaccaceae	g__Desulfobacca	s__uncultured_bacterium_g__Desulfobacca	OTU790	6	11	10	2	0	1	10	8	10	1	59
d__Bacteria	k__norank_d__Bacteria	p__Verrucomicrobiota	c__Chlamydiae	o__Chlamydiales	f__cvE6	g__norank_f__cvE6	s__metagenome_g__norank_f__cvE6	OTU908	0	0	0	0	0	0	0	0	1	0	1
d__Bacteria	k__norank_d__Bacteria	p__Cyanobacteria	c__Cyanobacteriia	o__Cyanobacteriales	f__Nostocaceae	g__Nostoc_PCC-7524	s__unclassified_g__Nostoc_PCC-7524	OTU767	1	0	0	0	0	0	2	0	0	0	3
d__Bacteria	k__norank_d__Bacteria	p__Firmicutes	c__Bacilli	o__Bacillales	f__Planococcaceae	g__Jeotgalibacillus	s__Jeotgalibacillus_malaysiensis	OTU898	0	0	0	1	0	0	0	0	0	0	1
d__Bacteria	k__norank_d__Bacteria	p__Firmicutes	c__Clostridia	o__Clostridiales	f__Clostridiaceae	g__Clostridium_sensu_stricto_1	s__unclassified_g__Clostridium_sensu_stricto_1	OTU1057	14	15	4	13	2	2	4	8	21	6	89
d__Bacteria	k__norank_d__Bacteria	p__Proteobacteria	c__Alphaproteobacteria	o__Acetobacterales	f__Acetobacteraceae	g__Roseomonas	s__unclassified_g__Roseomonas	OTU53	2	1	3	0	0	0	8	0	4	1	19
d__Bacteria	k__norank_d__Bacteria	p__Chloroflexi	c__Anaerolineae	o__Caldilineales	f__Caldilineaceae	g__norank_f__Caldilineaceae	s__unclassified_g__norank_f__Caldilineaceae	OTU973	1	1	0	1	0	0	0	1	1	0	5
d__Bacteria	k__norank_d__Bacteria	p__Firmicutes	c__Clostridia	o__Peptostreptococcales-Tissierellales	f__Thermotaleaceae	g__Crassaminicella	s__Marinisporobacter_sp.	OTU1093	0	0	0	0	0	0	1	0	1	0	2
d__Bacteria	k__norank_d__Bacteria	p__Bacteroidota	c__Bacteroidia	o__Chitinophagales	f__Saprospiraceae	g__norank_f__Saprospiraceae	s__uncultured_bacterium_g__norank_f__Saprospiraceae	OTU480	1	0	0	0	0	0	1	0	0	0	2
d__Bacteria	k__norank_d__Bacteria	p__Proteobacteria	c__Alphaproteobacteria	o__Rhizobiales	f__unclassified_o__Rhizobiales	g__unclassified_o__Rhizobiales	s__unclassified_o__Rhizobiales	OTU1018	8	7	5	3	0	2	2	0	7	0	34
d__Bacteria	k__norank_d__Bacteria	p__Actinobacteriota	c__Actinobacteria	o__Propionibacteriales	f__Nocardioidaceae	g__Nocardioides	s__Nocardioides_sp._g__Nocardioides	OTU17	1	0	0	0	0	0	0	1	0	0	2
d__Bacteria	k__norank_d__Bacteria	p__Firmicutes	c__Bacilli	o__Bacillales	f__Bacillaceae	g__Bacillus	s__unclassified_g__Bacillus	OTU443	0	2	3	1	0	0	0	0	0	0	6
d__Bacteria	k__norank_d__Bacteria	p__Chloroflexi	c__Anaerolineae	o__SJA-15	f__norank_o__SJA-15	g__norank_f__norank_o__SJA-15	s__unclassified_g__norank_f__norank_o__SJA-15	OTU1129	10	32	7	8	1	2	17	6	14	4	101
d__Bacteria	k__norank_d__Bacteria	p__Proteobacteria	c__Alphaproteobacteria	o__Rhizobiales	f__Rhizobiales_Incertae_Sedis	g__norank_f__Rhizobiales_Incertae_Sedis	s__unclassified_g__norank_f__Rhizobiales_Incertae_Sedis	OTU1037	0	0	1	1	0	0	1	1	0	0	4
d__Bacteria	k__norank_d__Bacteria	p__Chloroflexi	c__Anaerolineae	o__SBR1031	f__A4b	g__norank_f__A4b	s__unclassified_g__norank_f__A4b	OTU137	0	1	0	0	0	0	0	1	0	0	2
d__Bacteria	k__norank_d__Bacteria	p__Firmicutes	c__TSAC18	o__norank_c__TSAC18	f__norank_o__norank_c__TSAC18	g__norank_f__norank_o__norank_c__TSAC18	s__uncultured_bacterium_g__norank_f__norank_o__norank_c__TSAC18	OTU646	0	0	0	0	0	2	0	2	0	0	4
d__Bacteria	k__norank_d__Bacteria	p__Actinobacteriota	c__Thermoleophilia	o__Gaiellales	f__norank_o__Gaiellales	g__norank_f__norank_o__Gaiellales	s__unclassified_g__norank_f__norank_o__Gaiellales	OTU741	5	18	3	8	0	1	13	4	2	0	54
d__Bacteria	k__norank_d__Bacteria	p__Actinobacteriota	c__Acidimicrobiia	o__Microtrichales	f__Iamiaceae	g__Iamia	s__metagenome_g__Iamia	OTU770	0	0	1	0	0	0	1	0	1	0	3
d__Bacteria	k__norank_d__Bacteria	p__Desulfobacterota	c__Desulfobulbia	o__Desulfobulbales	f__Desulfocapsaceae	g__Desulfobacterium_catecholicum_group	s__uncultured_bacterium_g__Desulfobacterium_catecholicum_group	OTU826	0	0	3	0	0	0	0	2	0	1	6
d__Bacteria	k__norank_d__Bacteria	p__Firmicutes	c__Bacilli	o__Entomoplasmatales	f__Entomoplasmatales_Incertae_Sedis	g__Candidatus_Hepatoplasma	s__Astacus_leptodactylus_narrow-clawed_crayfish	OTU407	1	0	1793	6289	9707	0	12	19	7	13	17841
d__Bacteria	k__norank_d__Bacteria	p__Firmicutes	c__Clostridia	o__Lachnospirales	f__unclassified_o__Lachnospirales	g__unclassified_o__Lachnospirales	s__unclassified_o__Lachnospirales	OTU517	0	0	0	0	0	0	0	1	0	0	1
d__Bacteria	k__norank_d__Bacteria	p__Actinobacteriota	c__Actinobacteria	o__PeM15	f__norank_o__PeM15	g__norank_f__norank_o__PeM15	s__unclassified_g__norank_f__norank_o__PeM15	OTU679	2	2	2	0	0	0	1	1	0	1	9
d__Bacteria	k__norank_d__Bacteria	p__Actinobacteriota	c__Acidimicrobiia	o__Microtrichales	f__Ilumatobacteraceae	g__CL500-29_marine_group	s__uncultured_bacterium_g__CL500-29_marine_group	OTU124	1	2	1	0	0	0	0	0	1	0	5
d__Bacteria	k__norank_d__Bacteria	p__Verrucomicrobiota	c__Kiritimatiellae	o__113B434	f__norank_o__113B434	g__norank_f__norank_o__113B434	s__uncultured_bacterium_g__norank_f__norank_o__113B434	OTU241	0	1	1	0	0	1	0	0	0	0	3
d__Bacteria	k__norank_d__Bacteria	p__Cyanobacteria	c__Cyanobacteriia	o__Synechococcales	f__Cyanobiaceae	g__Cyanobium_PCC-6307	s__unclassified_g__Cyanobium_PCC-6307	OTU1144	49	52	6	15	3	3	15	11	9	12	175
d__Bacteria	k__norank_d__Bacteria	p__Proteobacteria	c__Gammaproteobacteria	o__Gammaproteobacteria_Incertae_Sedis	f__unclassified_o__Gammaproteobacteria_Incertae_Sedis	g__Candidatus_Berkiella	s__unclassified_g__Candidatus_Berkiella	OTU720	0	0	0	0	0	0	1	0	1	0	2
d__Bacteria	k__norank_d__Bacteria	p__Sumerlaeota	c__Sumerlaeia	o__Sumerlaeales	f__Sumerlaeaceae	g__Sumerlaea	s__uncultured_bacterium_g__Sumerlaea	OTU1094	1	6	2	0	0	0	2	1	1	1	14
d__Bacteria	k__norank_d__Bacteria	p__Acidobacteriota	c__Vicinamibacteria	o__Subgroup_17	f__norank_o__Subgroup_17	g__norank_f__norank_o__Subgroup_17	s__unclassified_g__norank_f__norank_o__Subgroup_17	OTU860	10	79	10	10	1	3	20	16	7	0	156
d__Bacteria	k__norank_d__Bacteria	p__Chloroflexi	c__Anaerolineae	o__ADurb.Bin180	f__norank_o__ADurb.Bin180	g__norank_f__norank_o__ADurb.Bin180	s__unclassified_g__norank_f__norank_o__ADurb.Bin180	OTU263	0	2	1	0	0	0	0	0	0	0	3
d__Bacteria	k__norank_d__Bacteria	p__Patescibacteria	c__Saccharimonadia	o__Saccharimonadales	f__norank_o__Saccharimonadales	g__norank_f__norank_o__Saccharimonadales	s__uncultured_bacterium_g__norank_f__norank_o__Saccharimonadales	OTU1127	5	1	3	3	1	2	4	0	3	2	24
d__Bacteria	k__norank_d__Bacteria	p__Chloroflexi	c__Anaerolineae	o__Caldilineales	f__Caldilineaceae	g__norank_f__Caldilineaceae	s__uncultured_Anaerolineaceae_bacterium_g__norank_f__Caldilineaceae	OTU256	0	4	1	2	1	0	0	0	2	1	11
d__Bacteria	k__norank_d__Bacteria	p__Desulfobacterota	c__Desulfobaccia	o__Desulfobaccales	f__Desulfobaccaceae	g__Desulfobacca	s__unclassified_g__Desulfobacca	OTU674	2	11	2	3	1	0	8	5	3	2	37
d__Bacteria	k__norank_d__Bacteria	p__Patescibacteria	c__Saccharimonadia	o__Saccharimonadales	f__norank_o__Saccharimonadales	g__norank_f__norank_o__Saccharimonadales	s__unclassified_g__norank_f__norank_o__Saccharimonadales	OTU518	0	0	0	0	1	0	0	1	0	0	2
d__Bacteria	k__norank_d__Bacteria	p__Cyanobacteria	c__Vampirivibrionia	o__Gastranaerophilales	f__norank_o__Gastranaerophilales	g__norank_f__norank_o__Gastranaerophilales	s__unclassified_g__norank_f__norank_o__Gastranaerophilales	OTU127	0	1	0	0	0	0	1	0	0	0	2
d__Bacteria	k__norank_d__Bacteria	p__Proteobacteria	c__Alphaproteobacteria	o__Caulobacterales	f__Parvularculaceae	g__Amphiplicatus	s__uncultured_Alphaproteobacteria_bacterium_g__Amphiplicatus	OTU331	1	0	0	0	1	0	0	1	0	0	3
d__Bacteria	k__norank_d__Bacteria	p__Proteobacteria	c__Alphaproteobacteria	o__unclassified_c__Alphaproteobacteria	f__unclassified_c__Alphaproteobacteria	g__unclassified_c__Alphaproteobacteria	s__unclassified_c__Alphaproteobacteria	OTU1007	0	0	1	0	0	0	0	0	1	3	5
d__Bacteria	k__norank_d__Bacteria	p__Bacteroidota	c__Bacteroidia	o__Chitinophagales	f__unclassified_o__Chitinophagales	g__unclassified_o__Chitinophagales	s__unclassified_o__Chitinophagales	OTU1101	0	0	0	0	0	0	0	0	0	1	1
d__Bacteria	k__norank_d__Bacteria	p__Verrucomicrobiota	c__Chlamydiae	o__Chlamydiales	f__Parachlamydiaceae	g__Neochlamydia	s__uncultured_bacterium_g__Neochlamydia	OTU562	1	0	0	0	3	0	0	0	0	0	4
d__Bacteria	k__norank_d__Bacteria	p__Verrucomicrobiota	c__Verrucomicrobiae	o__Verrucomicrobiales	f__Rubritaleaceae	g__Luteolibacter	s__uncultured_bacterium_g__Luteolibacter	OTU48	0	0	0	1	0	0	0	0	0	0	1
d__Bacteria	k__norank_d__Bacteria	p__Actinobacteriota	c__Acidimicrobiia	o__Microtrichales	f__Ilumatobacteraceae	g__CL500-29_marine_group	s__uncultured_marine_bacterium_g__CL500-29_marine_group	OTU781	0	1	0	0	0	1	0	1	0	0	3
d__Bacteria	k__norank_d__Bacteria	p__Firmicutes	c__Bacilli	o__Mycoplasmatales	f__Mycoplasmataceae	g__Candidatus_Bacilloplasma	s__uncultured_bacterium_g__Candidatus_Bacilloplasma	OTU165	1	3	0	0	1	0	4	0	7	2	18
d__Bacteria	k__norank_d__Bacteria	p__Proteobacteria	c__Gammaproteobacteria	o__Competibacterales	f__Competibacteraceae	g__Candidatus_Competibacter	s__uncultured_bacterium_g__Candidatus_Competibacter	OTU872	5	12	7	2	0	3	1	0	3	1	34
d__Bacteria	k__norank_d__Bacteria	p__Patescibacteria	c__Saccharimonadia	o__Saccharimonadales	f__norank_o__Saccharimonadales	g__norank_f__norank_o__Saccharimonadales	s__unclassified_g__norank_f__norank_o__Saccharimonadales	OTU200	0	0	1	0	0	0	0	0	0	0	1
d__Bacteria	k__norank_d__Bacteria	p__SAR324_cladeMarine_group_B	c__norank_p__SAR324_cladeMarine_group_B	o__norank_c__norank_p__SAR324_cladeMarine_group_B	f__norank_o__norank_c__norank_p__SAR324_cladeMarine_group_B	g__norank_f__norank_o__norank_c__norank_p__SAR324_cladeMarine_group_B	s__unclassified_g__norank_f__norank_o__norank_c__norank_p__SAR324_cladeMarine_group_B	OTU758	0	1	1	0	0	0	1	0	0	0	3
d__Bacteria	k__norank_d__Bacteria	p__Verrucomicrobiota	c__Verrucomicrobiae	o__Verrucomicrobiales	f__Rubritaleaceae	g__Luteolibacter	s__uncultured_bacterium_g__Luteolibacter	OTU411	0	1	0	0	0	0	1	1	0	1	4
d__Bacteria	k__norank_d__Bacteria	p__Chloroflexi	c__Anaerolineae	o__Anaerolineales	f__Anaerolineaceae	g__RBG-16-58-14	s__uncultured_bacterium_g__RBG-16-58-14	OTU789	10	49	6	5	2	0	14	6	0	2	94
d__Bacteria	k__norank_d__Bacteria	p__Proteobacteria	c__Alphaproteobacteria	o__Rhodobacterales	f__Rhodobacteraceae	g__Paracoccus	s__unclassified_g__Paracoccus	OTU846	44	134	12	10	10	10	60	17	1	14	312
d__Bacteria	k__norank_d__Bacteria	p__Bacteroidota	c__Bacteroidia	o__Flavobacteriales	f__Flavobacteriaceae	g__Flavobacterium	s__unclassified_g__Flavobacterium	OTU1024	1	0	1	0	0	0	0	0	0	0	2
d__Bacteria	k__norank_d__Bacteria	p__Proteobacteria	c__Gammaproteobacteria	o__Methylococcales	f__Methylomonadaceae	g__unclassified_f__Methylomonadaceae	s__unclassified_f__Methylomonadaceae	OTU239	1	1	5	1	6	0	1	5	3	3	26
d__Bacteria	k__norank_d__Bacteria	p__Firmicutes	c__Bacilli	o__Mycoplasmatales	f__Mycoplasmataceae	g__norank_f__Mycoplasmataceae	s__uncultured_Firmicutes_bacterium_g__norank_f__Mycoplasmataceae	OTU760	0	0	0	0	0	0	1	0	0	0	1
d__Bacteria	k__norank_d__Bacteria	p__Gemmatimonadota	c__Gemmatimonadetes	o__Gemmatimonadales	f__Gemmatimonadaceae	g__norank_f__Gemmatimonadaceae	s__metagenome_g__norank_f__Gemmatimonadaceae	OTU968	0	0	0	0	0	1	0	0	0	0	1
d__Bacteria	k__norank_d__Bacteria	p__Actinobacteriota	c__Actinobacteria	o__Frankiales	f__Sporichthyaceae	g__unclassified_f__Sporichthyaceae	s__unclassified_f__Sporichthyaceae	OTU111	1	7	2	0	0	0	1	2	0	0	13
d__Bacteria	k__norank_d__Bacteria	p__Proteobacteria	c__Gammaproteobacteria	o__Thiotrichales	f__Thiotrichaceae	g__Thiothrix	s__unclassified_g__Thiothrix	OTU990	1	0	0	1	0	12	1	2	1	1	19
d__Bacteria	k__norank_d__Bacteria	p__Patescibacteria	c__CPR2	o__norank_c__CPR2	f__norank_o__norank_c__CPR2	g__norank_f__norank_o__norank_c__CPR2	s__uncultured_bacterium_g__norank_f__norank_o__norank_c__CPR2	OTU983	1	2	0	0	1	0	3	1	1	0	9
d__Bacteria	k__norank_d__Bacteria	p__Actinobacteriota	c__Acidimicrobiia	o__Microtrichales	f__Ilumatobacteraceae	g__Ilumatobacter	s__unclassified_g__Ilumatobacter	OTU604	4	125	1	0	0	0	1	0	1	0	132
d__Bacteria	k__norank_d__Bacteria	p__Bacteroidota	c__Bacteroidia	o__Flavobacteriales	f__Flavobacteriaceae	g__norank_f__Flavobacteriaceae	s__uncultured_prokaryote_g__norank_f__Flavobacteriaceae	OTU794	0	0	0	0	0	1	0	2	0	0	3
d__Bacteria	k__norank_d__Bacteria	p__Proteobacteria	c__Gammaproteobacteria	o__Enterobacterales	f__Enterobacteriaceae	g__Enterobacter	s__unclassified_g__Enterobacter	OTU422	0	1	1521	5	100	11	100	0	22	3	1763
d__Bacteria	k__norank_d__Bacteria	p__Firmicutes	c__Clostridia	o__Lachnospirales	f__Lachnospiraceae	g__unclassified_f__Lachnospiraceae	s__unclassified_f__Lachnospiraceae	OTU757	0	1	0	0	0	1	2	0	0	0	4
d__Bacteria	k__norank_d__Bacteria	p__Firmicutes	c__Bacilli	o__Bacillales	f__Bacillaceae	g__Bacillus	s__Bacillus_selenatarsenatis	OTU436	1	4	1	2	0	0	0	0	1	0	9
d__Bacteria	k__norank_d__Bacteria	p__Acidobacteriota	c__Aminicenantia	o__Aminicenantales	f__norank_o__Aminicenantales	g__norank_f__norank_o__Aminicenantales	s__unclassified_g__norank_f__norank_o__Aminicenantales	OTU121	0	2	1	1	0	0	0	0	0	0	4
d__Bacteria	k__norank_d__Bacteria	p__unclassified_k__norank_d__Bacteria	c__unclassified_k__norank_d__Bacteria	o__unclassified_k__norank_d__Bacteria	f__unclassified_k__norank_d__Bacteria	g__unclassified_k__norank_d__Bacteria	s__unclassified_k__norank_d__Bacteria	OTU989	2	0	0	0	0	0	0	0	2	0	4
d__Bacteria	k__norank_d__Bacteria	p__Proteobacteria	c__Alphaproteobacteria	o__Rhodobacterales	f__Rhodobacteraceae	g__Roseovarius	s__unclassified_g__Roseovarius	OTU905	195	8	2	1	8	0	4	0	1	20	239
d__Bacteria	k__norank_d__Bacteria	p__Proteobacteria	c__Gammaproteobacteria	o__Xanthomonadales	f__Xanthomonadaceae	g__unclassified_f__Xanthomonadaceae	s__unclassified_f__Xanthomonadaceae	OTU910	0	0	1	0	0	0	0	4	0	4	9
d__Bacteria	k__norank_d__Bacteria	p__Desulfobacterota	c__Syntrophobacteria	o__Syntrophobacterales	f__Syntrophobacteraceae	g__Syntrophobacter	s__unclassified_g__Syntrophobacter	OTU978	3	0	1	3	0	0	0	1	1	1	10
d__Bacteria	k__norank_d__Bacteria	p__Firmicutes	c__Clostridia	o__Clostridiales	f__Clostridiaceae	g__Clostridium_sensu_stricto_13	s__unclassified_g__Clostridium_sensu_stricto_13	OTU977	1	2	0	1	0	0	2	0	1	0	7
d__Bacteria	k__norank_d__Bacteria	p__Proteobacteria	c__Alphaproteobacteria	o__Rhizobiales	f__Hyphomicrobiaceae	g__unclassified_f__Hyphomicrobiaceae	s__unclassified_f__Hyphomicrobiaceae	OTU225	0	0	1	0	0	0	1	0	0	0	2
d__Bacteria	k__norank_d__Bacteria	p__Verrucomicrobiota	c__Verrucomicrobiae	o__Verrucomicrobiales	f__Rubritaleaceae	g__Luteolibacter	s__uncultured_bacterium_g__Luteolibacter	OTU1085	2	2	3	0	0	0	0	0	1	0	8
d__Bacteria	k__norank_d__Bacteria	p__Patescibacteria	c__Saccharimonadia	o__Saccharimonadales	f__Saccharimonadaceae	g__TM7a	s__uncultured_bacterium_g__TM7a	OTU617	2	2	0	1	0	2	0	1	0	0	8
d__Bacteria	k__norank_d__Bacteria	p__Chloroflexi	c__Anaerolineae	o__norank_c__Anaerolineae	f__norank_o__norank_c__Anaerolineae	g__norank_f__norank_o__norank_c__Anaerolineae	s__uncultured_Chloroflexi_bacterium_g__norank_f__norank_o__norank_c__Anaerolineae	OTU824	5	16	0	1	0	0	4	4	3	0	33
d__Bacteria	k__norank_d__Bacteria	p__Chloroflexi	c__Anaerolineae	o__Anaerolineales	f__Anaerolineaceae	g__Pelolinea	s__uncultured_bacterium_g__Pelolinea	OTU746	0	5	0	0	0	0	2	1	0	0	8
d__Bacteria	k__norank_d__Bacteria	p__Proteobacteria	c__Alphaproteobacteria	o__Sphingomonadales	f__Sphingomonadaceae	g__Sandaracinobacter	s__uncultured_bacterium_g__Sandaracinobacter	OTU163	0	0	1	0	0	0	0	0	0	1	2
d__Bacteria	k__norank_d__Bacteria	p__Bacteroidota	c__Bacteroidia	o__Chitinophagales	f__Saprospiraceae	g__Phaeodactylibacter	s__uncultured_bacterium_g__Phaeodactylibacter	OTU1138	0	0	0	0	0	0	0	0	0	2	2
d__Bacteria	k__norank_d__Bacteria	p__Proteobacteria	c__Gammaproteobacteria	o__Methylococcales	f__Methylococcaceae	g__Methyloparacoccus	s__uncultured_bacterium_g__Methyloparacoccus	OTU925	5	5	5	1	0	1	4	1	7	1	30
d__Bacteria	k__norank_d__Bacteria	p__Proteobacteria	c__Alphaproteobacteria	o__Rhizobiales	f__Xanthobacteraceae	g__norank_f__Xanthobacteraceae	s__uncultured_bacterium_g__norank_f__Xanthobacteraceae	OTU210	0	0	0	0	0	0	0	1	0	1	2
d__Bacteria	k__norank_d__Bacteria	p__Actinobacteriota	c__Actinobacteria	o__Micromonosporales	f__Micromonosporaceae	g__norank_f__Micromonosporaceae	s__uncultured_bacterium_g__norank_f__Micromonosporaceae	OTU1054	0	0	1	1	0	0	0	0	0	0	2
d__Bacteria	k__norank_d__Bacteria	p__Patescibacteria	c__CPR2	o__norank_c__CPR2	f__norank_o__norank_c__CPR2	g__norank_f__norank_o__norank_c__CPR2	s__uncultured_microorganism_g__norank_f__norank_o__norank_c__CPR2	OTU984	1	3	0	2	0	0	4	3	1	1	15
d__Bacteria	k__norank_d__Bacteria	p__Cyanobacteria	c__Cyanobacteriia	o__Cyanobacteriales	f__Nostocaceae	g__Nostoc_PCC-8976	s__unclassified_g__Nostoc_PCC-8976	OTU1122	2	11	1	3	1	1	10	11	2	2	44
d__Bacteria	k__norank_d__Bacteria	p__Patescibacteria	c__Saccharimonadia	o__Saccharimonadales	f__unclassified_o__Saccharimonadales	g__unclassified_o__Saccharimonadales	s__unclassified_o__Saccharimonadales	OTU34	1	0	0	1	0	0	0	0	0	0	2
d__Bacteria	k__norank_d__Bacteria	p__Bacteroidota	c__Bacteroidia	o__Cytophagales	f__Microscillaceae	g__norank_f__Microscillaceae	s__unclassified_g__norank_f__Microscillaceae	OTU303	0	0	0	0	0	0	0	0	0	1	1
d__Bacteria	k__norank_d__Bacteria	p__Firmicutes	c__Bacilli	o__Entomoplasmatales	f__Entomoplasmatales_Incertae_Sedis	g__Candidatus_Hepatoplasma	s__uncultured_bacterium_g__Candidatus_Hepatoplasma	OTU919	23	0	5	1467	18622	0	28	149	1149	926	22369
d__Bacteria	k__norank_d__Bacteria	p__Firmicutes	c__Clostridia	o__Christensenellales	f__Christensenellaceae	g__Christensenellaceae_R-7_group	s__unclassified_g__Christensenellaceae_R-7_group	OTU97	0	2	0	0	0	0	0	0	0	0	2
d__Bacteria	k__norank_d__Bacteria	p__unclassified_k__norank_d__Bacteria	c__unclassified_k__norank_d__Bacteria	o__unclassified_k__norank_d__Bacteria	f__unclassified_k__norank_d__Bacteria	g__unclassified_k__norank_d__Bacteria	s__unclassified_k__norank_d__Bacteria	OTU1040	0	0	0	0	1	0	0	0	0	0	1
d__Bacteria	k__norank_d__Bacteria	p__Proteobacteria	c__Alphaproteobacteria	o__Caulobacterales	f__Caulobacteraceae	g__Brevundimonas	s__Brevundimonas_diminuta	OTU672	0	0	0	0	0	0	0	0	1	1	2
d__Bacteria	k__norank_d__Bacteria	p__Chloroflexi	c__KD4-96	o__norank_c__KD4-96	f__norank_o__norank_c__KD4-96	g__norank_f__norank_o__norank_c__KD4-96	s__unclassified_g__norank_f__norank_o__norank_c__KD4-96	OTU106	13	50	5	16	1	5	19	5	2	2	118
d__Bacteria	k__norank_d__Bacteria	p__Firmicutes	c__Clostridia	o__Peptostreptococcales-Tissierellales	f__Fusibacteraceae	g__Fusibacter	s__unclassified_g__Fusibacter	OTU1112	0	0	0	0	0	0	0	0	0	1	1
d__Bacteria	k__norank_d__Bacteria	p__Actinobacteriota	c__Acidimicrobiia	o__Microtrichales	f__norank_o__Microtrichales	g__norank_f__norank_o__Microtrichales	s__wastewater_metagenome_g__norank_f__norank_o__Microtrichales	OTU170	2	2	0	3	0	0	0	0	0	0	7
d__Bacteria	k__norank_d__Bacteria	p__Firmicutes	c__Bacilli	o__Lactobacillales	f__Lactobacillaceae	g__Lactobacillus	s__Lactobacillus_johnsonii	OTU211	1	0	0	0	0	0	0	0	0	0	1
d__Bacteria	k__norank_d__Bacteria	p__Bacteroidota	c__SJA-28	o__norank_c__SJA-28	f__norank_o__norank_c__SJA-28	g__norank_f__norank_o__norank_c__SJA-28	s__unclassified_g__norank_f__norank_o__norank_c__SJA-28	OTU751	1	0	1	0	0	0	1	0	0	0	3
d__Bacteria	k__norank_d__Bacteria	p__Proteobacteria	c__Alphaproteobacteria	o__Rhizobiales	f__Beijerinckiaceae	g__Microvirga	s__uncultured_bacterium_g__Microvirga	OTU895	0	0	1	0	0	0	0	1	0	0	2
d__Bacteria	k__norank_d__Bacteria	p__Patescibacteria	c__Saccharimonadia	o__Saccharimonadales	f__unclassified_o__Saccharimonadales	g__unclassified_o__Saccharimonadales	s__unclassified_o__Saccharimonadales	OTU608	3	1	0	0	1	0	0	0	0	0	5
d__Bacteria	k__norank_d__Bacteria	p__Chloroflexi	c__Anaerolineae	o__Caldilineales	f__Caldilineaceae	g__norank_f__Caldilineaceae	s__metagenome_g__norank_f__Caldilineaceae	OTU142	0	8	0	0	0	0	0	0	0	0	8
d__Bacteria	k__norank_d__Bacteria	p__Patescibacteria	c__CPR2	o__norank_c__CPR2	f__norank_o__norank_c__CPR2	g__norank_f__norank_o__norank_c__CPR2	s__uncultured_bacterium_g__norank_f__norank_o__norank_c__CPR2	OTU1015	1	0	0	0	0	0	0	0	2	0	3
d__Bacteria	k__norank_d__Bacteria	p__Bacteroidota	c__Bacteroidia	o__Sphingobacteriales	f__Lentimicrobiaceae	g__norank_f__Lentimicrobiaceae	s__unclassified_g__norank_f__Lentimicrobiaceae	OTU626	0	0	2	0	0	3	0	0	0	0	5
d__Bacteria	k__norank_d__Bacteria	p__Patescibacteria	c__CPR2	o__norank_c__CPR2	f__norank_o__norank_c__CPR2	g__norank_f__norank_o__norank_c__CPR2	s__uncultured_bacterium_g__norank_f__norank_o__norank_c__CPR2	OTU1011	2	3	6	3	1	1	6	2	8	1	33
d__Bacteria	k__norank_d__Bacteria	p__Proteobacteria	c__Alphaproteobacteria	o__Rhodobacterales	f__Rhodobacteraceae	g__Tropicimonas	s__uncultured_bacterium_g__Tropicimonas	OTU877	10	16	4	7	0	5	6	10	20	0	78
d__Bacteria	k__norank_d__Bacteria	p__Myxococcota	c__Polyangia	o__Nannocystales	f__Nannocystaceae	g__Nannocystis	s__metagenome_g__Nannocystis	OTU656	2	2	0	0	0	0	1	0	0	0	5
d__Bacteria	k__norank_d__Bacteria	p__Chloroflexi	c__Anaerolineae	o__Caldilineales	f__Caldilineaceae	g__norank_f__Caldilineaceae	s__unclassified_g__norank_f__Caldilineaceae	OTU104	1	3	1	2	0	0	1	1	2	2	13
d__Bacteria	k__norank_d__Bacteria	p__Spirochaetota	c__Spirochaetia	o__Spirochaetales	f__Spirochaetaceae	g__M2PT2-76_termite_group	s__uncultured_bacterium_g__M2PT2-76_termite_group	OTU16	2	0	0	0	0	0	0	0	0	0	2
d__Bacteria	k__norank_d__Bacteria	p__Patescibacteria	c__Saccharimonadia	o__Saccharimonadales	f__Saccharimonadaceae	g__TM7a	s__uncultured_bacterium_g__TM7a	OTU463	0	0	0	1	0	0	0	0	0	0	1
d__Bacteria	k__norank_d__Bacteria	p__Proteobacteria	c__Gammaproteobacteria	o__Burkholderiales	f__Comamonadaceae	g__unclassified_f__Comamonadaceae	s__unclassified_f__Comamonadaceae	OTU982	1	0	1	0	0	2	0	0	2	1	7
d__Bacteria	k__norank_d__Bacteria	p__Bacteroidota	c__Bacteroidia	o__Chitinophagales	f__Chitinophagaceae	g__unclassified_f__Chitinophagaceae	s__unclassified_f__Chitinophagaceae	OTU474	0	0	0	0	0	0	3	0	0	0	3
d__Bacteria	k__norank_d__Bacteria	p__Nitrospinota	c__P9X2b3D02	o__norank_c__P9X2b3D02	f__norank_o__norank_c__P9X2b3D02	g__norank_f__norank_o__norank_c__P9X2b3D02	s__uncultured_bacterium_g__norank_f__norank_o__norank_c__P9X2b3D02	OTU90	1	5	0	0	0	0	0	0	0	0	6
d__Bacteria	k__norank_d__Bacteria	p__Proteobacteria	c__Gammaproteobacteria	o__Competibacterales	f__Competibacteraceae	g__Candidatus_Competibacter	s__uncultured_gamma_proteobacterium_g__Candidatus_Competibacter	OTU924	2	25	9	1	0	2	9	2	6	6	62
d__Bacteria	k__norank_d__Bacteria	p__Proteobacteria	c__Gammaproteobacteria	o__Aeromonadales	f__Aeromonadaceae	g__Aeromonas	s__unclassified_g__Aeromonas	OTU1080	0	0	0	1	0	0	0	0	0	0	1
d__Bacteria	k__norank_d__Bacteria	p__Firmicutes	c__Bacilli	o__Exiguobacterales	f__Exiguobacteraceae	g__Exiguobacterium	s__Exiguobacterium_sp._AT1b	OTU850	1	4	3	2	5	1	1	8	0	1	26
d__Bacteria	k__norank_d__Bacteria	p__Proteobacteria	c__Gammaproteobacteria	o__Thiotrichales	f__Thiotrichaceae	g__Thiothrix	s__unclassified_g__Thiothrix	OTU1124	0	0	0	0	0	0	0	0	0	1	1
d__Bacteria	k__norank_d__Bacteria	p__Firmicutes	c__Bacilli	o__Bacillales	f__Sporolactobacillaceae	g__Sporolactobacillus	s__Sporolactobacillus_inulinus	OTU216	0	0	0	0	0	0	0	0	0	2	2
d__Bacteria	k__norank_d__Bacteria	p__MBNT15	c__norank_p__MBNT15	o__norank_c__norank_p__MBNT15	f__norank_o__norank_c__norank_p__MBNT15	g__norank_f__norank_o__norank_c__norank_p__MBNT15	s__unclassified_g__norank_f__norank_o__norank_c__norank_p__MBNT15	OTU301	0	0	1	0	0	0	0	0	1	0	2
d__Bacteria	k__norank_d__Bacteria	p__Proteobacteria	c__Alphaproteobacteria	o__unclassified_c__Alphaproteobacteria	f__unclassified_c__Alphaproteobacteria	g__unclassified_c__Alphaproteobacteria	s__unclassified_c__Alphaproteobacteria	OTU1046	2	136	801	0	126	176	79	24	0	70	1414
d__Bacteria	k__norank_d__Bacteria	p__Patescibacteria	c__Saccharimonadia	o__Saccharimonadales	f__norank_o__Saccharimonadales	g__norank_f__norank_o__Saccharimonadales	s__uncultured_organism_g__norank_f__norank_o__Saccharimonadales	OTU1139	6	6	0	0	0	0	0	0	0	2	14
d__Bacteria	k__norank_d__Bacteria	p__Proteobacteria	c__Alphaproteobacteria	o__Rhizobiales	f__Rhizobiaceae	g__Allorhizobium-Neorhizobium-Pararhizobium-Rhizobium	s__unclassified_g__Allorhizobium-Neorhizobium-Pararhizobium-Rhizobium	OTU613	0	1	0	0	0	0	0	0	0	0	1
d__Bacteria	k__norank_d__Bacteria	p__Proteobacteria	c__Gammaproteobacteria	o__Coxiellales	f__Coxiellaceae	g__Coxiella	s__uncultured_Coxiellaceae_bacterium_g__Coxiella	OTU248	0	0	2	0	0	0	0	0	0	0	2
d__Bacteria	k__norank_d__Bacteria	p__Firmicutes	c__Clostridia	o__Lachnospirales	f__Lachnospiraceae	g__unclassified_f__Lachnospiraceae	s__unclassified_f__Lachnospiraceae	OTU894	1	1	0	1	0	0	0	0	2	0	5
d__Bacteria	k__norank_d__Bacteria	p__Proteobacteria	c__Gammaproteobacteria	o__Steroidobacterales	f__Steroidobacteraceae	g__norank_f__Steroidobacteraceae	s__uncultured_gamma_proteobacterium_g__norank_f__Steroidobacteraceae	OTU933	65	199	98	54	10	38	84	9	53	13	623
d__Bacteria	k__norank_d__Bacteria	p__Actinobacteriota	c__Actinobacteria	o__Frankiales	f__Sporichthyaceae	g__hgcI_clade	s__uncultured_bacterium_g__hgcI_clade	OTU593	0	2	0	0	0	1	4	2	0	0	9
d__Bacteria	k__norank_d__Bacteria	p__Bacteroidota	c__Bacteroidia	o__Bacteroidales	f__Dysgonomonadaceae	g__Dysgonomonas	s__uncultured_bacterium_g__Dysgonomonas	OTU429	878	1016	58	1432	204	352	2480	160	524	1119	8223
d__Bacteria	k__norank_d__Bacteria	p__Desulfobacterota	c__Desulfovibrionia	o__Desulfovibrionales	f__Desulfovibrionaceae	g__Desulfovibrio	s__unclassified_g__Desulfovibrio	OTU359	0	0	0	0	0	0	0	2	0	0	2
d__Bacteria	k__norank_d__Bacteria	p__Firmicutes	c__Bacilli	o__Staphylococcales	f__Staphylococcaceae	g__Staphylococcus	s__Staphylococcus_saprophyticus_g__Staphylococcus	OTU676	0	0	1	0	0	0	0	0	0	0	1
d__Bacteria	k__norank_d__Bacteria	p__Verrucomicrobiota	c__Kiritimatiellae	o__WCHB1-41	f__norank_o__WCHB1-41	g__norank_f__norank_o__WCHB1-41	s__uncultured_Chlorobi_bacterium_g__norank	OTU285	0	8	2	0	1	0	1	0	0	0	12
d__Bacteria	k__norank_d__Bacteria	p__Proteobacteria	c__Gammaproteobacteria	o__Cellvibrionales	f__Halieaceae	g__unclassified_f__Halieaceae	s__unclassified_f__Halieaceae	OTU743	2	2	3	0	2	0	3	12	4	6	34
d__Bacteria	k__norank_d__Bacteria	p__Firmicutes	c__Bacilli	o__Mycoplasmatales	f__Mycoplasmataceae	g__norank_f__Mycoplasmataceae	s__uncultured_Firmicutes_bacterium_g__norank_f__Mycoplasmataceae	OTU30	95	140	0	52	5	0	15	93	387	349	1136
d__Bacteria	k__norank_d__Bacteria	p__Gemmatimonadota	c__Gemmatimonadetes	o__Gemmatimonadales	f__Gemmatimonadaceae	g__norank_f__Gemmatimonadaceae	s__Gemmatimonadetes_bacterium_SCN_70-22	OTU27	1	0	1	0	0	0	0	0	0	0	2
d__Bacteria	k__norank_d__Bacteria	p__Desulfobacterota	c__Syntrophobacteria	o__Syntrophobacterales	f__Syntrophobacteraceae	g__Syntrophobacter	s__uncultured_soil_bacterium_g__Syntrophobacter	OTU776	2	0	0	0	0	0	1	1	0	0	4
d__Bacteria	k__norank_d__Bacteria	p__Firmicutes	c__Bacilli	o__Mycoplasmatales	f__Mycoplasmataceae	g__Candidatus_Bacilloplasma	s__uncultured_bacterium_g__Candidatus_Bacilloplasma	OTU546	129	10	18	25	25	27	43	62	168	177	684
d__Bacteria	k__norank_d__Bacteria	p__Actinobacteriota	c__Acidimicrobiia	o__Microtrichales	f__Ilumatobacteraceae	g__CL500-29_marine_group	s__uncultured_bacterium_g__CL500-29_marine_group	OTU118	1	2	1	0	0	0	0	0	0	0	4
d__Bacteria	k__norank_d__Bacteria	p__Patescibacteria	c__WWE3	o__norank_c__WWE3	f__norank_o__norank_c__WWE3	g__norank_f__norank_o__norank_c__WWE3	s__unclassified_g__norank_f__norank_o__norank_c__WWE3	OTU1075	0	4	0	1	1	2	1	0	3	0	12
d__Bacteria	k__norank_d__Bacteria	p__unclassified_k__norank_d__Bacteria	c__unclassified_k__norank_d__Bacteria	o__unclassified_k__norank_d__Bacteria	f__unclassified_k__norank_d__Bacteria	g__unclassified_k__norank_d__Bacteria	s__unclassified_k__norank_d__Bacteria	OTU993	2	1	1	0	0	0	0	0	1	1	6
d__Bacteria	k__norank_d__Bacteria	p__Proteobacteria	c__Alphaproteobacteria	o__Rhodobacterales	f__Rhodobacteraceae	g__Rhodobacter	s__uncultured_bacterium_g__Rhodobacter	OTU665	29	27	31	22	12	30	13	24	48	14	250
d__Bacteria	k__norank_d__Bacteria	p__Bacteroidota	c__Bacteroidia	o__Bacteroidales	f__Tannerellaceae	g__Parabacteroides	s__unclassified_g__Parabacteroides	OTU1083	3	27	945	6	2111	160	90	3	1	23	3369
d__Bacteria	k__norank_d__Bacteria	p__Proteobacteria	c__Gammaproteobacteria	o__unclassified_c__Gammaproteobacteria	f__unclassified_c__Gammaproteobacteria	g__unclassified_c__Gammaproteobacteria	s__unclassified_c__Gammaproteobacteria	OTU986	0	0	0	0	0	0	0	0	2	0	2
d__Bacteria	k__norank_d__Bacteria	p__unclassified_k__norank_d__Bacteria	c__unclassified_k__norank_d__Bacteria	o__unclassified_k__norank_d__Bacteria	f__unclassified_k__norank_d__Bacteria	g__unclassified_k__norank_d__Bacteria	s__unclassified_k__norank_d__Bacteria	OTU328	0	0	0	0	0	0	0	0	0	1	1
d__Bacteria	k__norank_d__Bacteria	p__Bacteroidota	c__Bacteroidia	o__Cytophagales	f__Spirosomaceae	g__Taeseokella	s__unclassified_g__Taeseokella	OTU1084	0	0	0	0	0	1	0	1	0	0	2
d__Bacteria	k__norank_d__Bacteria	p__Proteobacteria	c__Gammaproteobacteria	o__Burkholderiales	f__Hydrogenophilaceae	g__Thiobacillus	s__uncultured_Thiobacillus_sp._g__Thiobacillus	OTU1013	1	1	7	0	0	2	0	0	1	3	15
d__Bacteria	k__norank_d__Bacteria	p__Proteobacteria	c__Alphaproteobacteria	o__Rhodobacterales	f__Rhodobacteraceae	g__unclassified_f__Rhodobacteraceae	s__unclassified_f__Rhodobacteraceae	OTU435	41	6	1	0	3	0	25	2	5	5	88
d__Bacteria	k__norank_d__Bacteria	p__Chloroflexi	c__Anaerolineae	o__Anaerolineales	f__Anaerolineaceae	g__norank_f__Anaerolineaceae	s__uncultured_prokaryote_g__norank_f__Anaerolineaceae	OTU1102	1	17	7	2	0	2	8	3	0	1	41
d__Bacteria	k__norank_d__Bacteria	p__Proteobacteria	c__Alphaproteobacteria	o__Azospirillales	f__norank_o__Azospirillales	g__norank_f__norank_o__Azospirillales	s__uncultured_bacterium_g__norank_f__norank_o__Azospirillales	OTU1048	0	0	0	0	0	0	0	1	0	0	1
d__Bacteria	k__norank_d__Bacteria	p__Bacteroidota	c__Bacteroidia	o__Bacteroidales	f__Muribaculaceae	g__norank_f__Muribaculaceae	s__uncultured_bacterium_g__norank_f__Muribaculaceae	OTU191	0	0	0	0	0	1	0	0	0	0	1
d__Bacteria	k__norank_d__Bacteria	p__WS2	c__norank_p__WS2	o__norank_c__norank_p__WS2	f__norank_o__norank_c__norank_p__WS2	g__norank_f__norank_o__norank_c__norank_p__WS2	s__unclassified_g__norank_f__norank_o__norank_c__norank_p__WS2	OTU1017	1	2	1	0	0	1	0	0	1	0	6
d__Bacteria	k__norank_d__Bacteria	p__Chloroflexi	c__Anaerolineae	o__1-20	f__norank_o__1-20	g__norank_f__norank_o__1-20	s__uncultured_bacterium_g__norank_f__norank_o__1-20	OTU86	1	5	0	2	1	0	2	2	1	0	14
d__Bacteria	k__norank_d__Bacteria	p__Actinobacteriota	c__Actinobacteria	o__Streptomycetales	f__Streptomycetaceae	g__Streptomyces	s__unclassified_g__Streptomyces	OTU278	1	0	1	0	0	0	0	0	0	0	2
d__Bacteria	k__norank_d__Bacteria	p__Chloroflexi	c__Anaerolineae	o__SBR1031	f__A4b	g__norank_f__A4b	s__unclassified_g__norank_f__A4b	OTU1130	0	0	0	0	1	0	0	0	0	1	2
d__Bacteria	k__norank_d__Bacteria	p__Proteobacteria	c__Gammaproteobacteria	o__Burkholderiales	f__Burkholderiaceae	g__Ralstonia	s__Ralstonia_pickettii	OTU742	0	0	0	1	0	0	2	5	0	0	8
d__Bacteria	k__norank_d__Bacteria	p__Proteobacteria	c__Alphaproteobacteria	o__Defluviicoccales	f__Defluviicoccaceae	g__Defluviicoccus	s__unclassified_g__Defluviicoccus	OTU115	0	2	0	0	0	0	0	0	1	0	3
d__Bacteria	k__norank_d__Bacteria	p__Verrucomicrobiota	c__Chlamydiae	o__Chlamydiales	f__unclassified_o__Chlamydiales	g__unclassified_o__Chlamydiales	s__unclassified_o__Chlamydiales	OTU873	0	1	2	0	0	0	0	0	1	0	4
d__Bacteria	k__norank_d__Bacteria	p__Proteobacteria	c__Alphaproteobacteria	o__Rhizobiales	f__Hyphomicrobiaceae	g__Hyphomicrobium	s__metagenome_g__Hyphomicrobium	OTU856	0	2	0	1	0	0	0	2	3	3	11
d__Bacteria	k__norank_d__Bacteria	p__Patescibacteria	c__Dojkabacteria	o__norank_c__Dojkabacteria	f__norank_o__norank_c__Dojkabacteria	g__norank_f__norank_o__norank_c__Dojkabacteria	s__uncultured_bacterium_g__norank_f__norank_o__norank_c__Dojkabacteria	OTU611	1	0	0	0	0	0	0	0	0	0	1
d__Bacteria	k__norank_d__Bacteria	p__Actinobacteriota	c__Acidimicrobiia	o__IMCC26256	f__norank_o__IMCC26256	g__norank_f__norank_o__IMCC26256	s__unclassified_g__norank_f__norank_o__IMCC26256	OTU305	0	0	0	0	0	0	1	0	0	0	1
d__Bacteria	k__norank_d__Bacteria	p__Verrucomicrobiota	c__Verrucomicrobiae	o__Verrucomicrobiales	f__Rubritaleaceae	g__norank_f__Rubritaleaceae	s__uncultured_bacterium_g__norank_f__Rubritaleaceae	OTU12	1	0	2	0	0	0	0	0	0	0	3
d__Bacteria	k__norank_d__Bacteria	p__Cyanobacteria	c__Cyanobacteriia	o__Chloroplast	f__norank_o__Chloroplast	g__norank_f__norank_o__Chloroplast	s__Pectinodesmus_pectinatus	OTU108	1	2	0	0	0	0	0	1	0	0	4
d__Bacteria	k__norank_d__Bacteria	p__Proteobacteria	c__Alphaproteobacteria	o__Rhizobiales	f__unclassified_o__Rhizobiales	g__unclassified_o__Rhizobiales	s__unclassified_o__Rhizobiales	OTU74	13	11	1	1	0	0	13	5	1	2	47
d__Bacteria	k__norank_d__Bacteria	p__Bacteroidota	c__Bacteroidia	o__Chitinophagales	f__Saprospiraceae	g__norank_f__Saprospiraceae	s__uncultured_bacterium_g__norank_f__Saprospiraceae	OTU1131	0	0	1	0	0	0	0	0	0	1	2
d__Bacteria	k__norank_d__Bacteria	p__Desulfobacterota	c__Desulfobulbia	o__Desulfobulbales	f__Desulfobulbaceae	g__Desulfobulbus	s__uncultured_Desulfobulbus_sp._g__Desulfobulbus	OTU623	1	0	1	0	1	2	0	0	0	1	6
d__Bacteria	k__norank_d__Bacteria	p__Proteobacteria	c__Gammaproteobacteria	o__Steroidobacterales	f__Steroidobacteraceae	g__norank_f__Steroidobacteraceae	s__unclassified_g__norank_f__Steroidobacteraceae	OTU994	1	2	0	4	1	0	3	0	4	1	16
d__Bacteria	k__norank_d__Bacteria	p__Actinobacteriota	c__Actinobacteria	o__Propionibacteriales	f__Nocardioidaceae	g__Aeromicrobium	s__bacterium_g__Aeromicrobium	OTU698	1	0	0	0	0	0	0	0	0	0	1
d__Bacteria	k__norank_d__Bacteria	p__Firmicutes	c__Clostridia	o__Lachnospirales	f__Lachnospiraceae	g__Tyzzerella	s__unclassified_g__Tyzzerella	OTU835	7	136	75	288	107	0	590	216	0	650	2069
d__Bacteria	k__norank_d__Bacteria	p__Cyanobacteria	c__Cyanobacteriia	o__Cyanobacteriales	f__Nostocaceae	g__Sphaerospermopsis_BCCUSP55	s__uncultured_bacterium_g__Sphaerospermopsis_BCCUSP55	OTU768	0	0	2	0	0	0	2	0	2	0	6
d__Bacteria	k__norank_d__Bacteria	p__Bacteroidota	c__Bacteroidia	o__Bacteroidales	f__Barnesiellaceae	g__Barnesiella	s__Barnesiella_viscericola_DSM_18177	OTU559	0	0	0	0	2	0	0	0	0	0	2
d__Bacteria	k__norank_d__Bacteria	p__Actinobacteriota	c__Thermoleophilia	o__Gaiellales	f__norank_o__Gaiellales	g__norank_f__norank_o__Gaiellales	s__uncultured_Rubrobacteraceae_bacterium_g__norank	OTU246	9	18	6	9	1	1	23	16	4	1	88
d__Bacteria	k__norank_d__Bacteria	p__Acidobacteriota	c__Vicinamibacteria	o__Vicinamibacterales	f__Vicinamibacteraceae	g__Luteitalea	s__uncultured_bacterium_g__Luteitalea	OTU819	1	1	0	1	0	0	1	1	0	0	5
d__Bacteria	k__norank_d__Bacteria	p__Cyanobacteria	c__Cyanobacteriia	o__Cyanobacteriales	f__Nostocaceae	g__Sphaerospermopsis_BCCUSP55	s__Sphaerospermopsis_kisseleviana_NIES-73	OTU761	0	6	0	0	0	1	3	1	0	3	14
d__Bacteria	k__norank_d__Bacteria	p__Chloroflexi	c__Anaerolineae	o__Anaerolineales	f__Anaerolineaceae	g__norank_f__Anaerolineaceae	s__uncultured_Anaerolineaceae_bacterium_g__norank_f__Anaerolineaceae	OTU782	6	6	5	9	0	0	12	7	8	6	59
d__Bacteria	k__norank_d__Bacteria	p__Proteobacteria	c__Gammaproteobacteria	o__Methylococcales	f__Methylococcaceae	g__norank_f__Methylococcaceae	s__uncultured_bacterium_g__norank_f__Methylococcaceae	OTU1058	0	0	0	0	0	0	0	0	1	0	1
d__Bacteria	k__norank_d__Bacteria	p__Desulfobacterota	c__Desulfobulbia	o__Desulfobulbales	f__Desulfocapsaceae	g__unclassified_f__Desulfocapsaceae	s__unclassified_f__Desulfocapsaceae	OTU791	2	8	1	2	0	1	1	10	3	0	28
d__Bacteria	k__norank_d__Bacteria	p__Myxococcota	c__Polyangia	o__Polyangiales	f__Polyangiaceae	g__Polyangium	s__metagenome_g__Polyangium	OTU277	2	0	1	0	0	0	0	0	0	0	3
d__Bacteria	k__norank_d__Bacteria	p__Firmicutes	c__Clostridia	o__Clostridiales	f__Clostridiaceae	g__Clostridium_sensu_stricto_11	s__Clostridium_sp._DY2632	OTU1140	0	0	0	0	0	0	0	1	0	1	2
d__Bacteria	k__norank_d__Bacteria	p__Proteobacteria	c__Gammaproteobacteria	o__Pseudomonadales	f__Pseudomonadaceae	g__Pseudomonas	s__unclassified_g__Pseudomonas	OTU766	8	1	0	0	0	0	2	0	0	2	13
